# Supplementary material for: Development of Autophagy Signature-Based Prognostic Nomogram for Refined Glioma Survival Prognostication
Source: Biomed Res Int. 2020 Sep 4;2020:1872962. doi: 10.1155/2020/1872962 (PMC7492900; doi:10.1155/2020/1872962)
Supplement: Supplementary Materials — . Table S1: a list of autophagy-related genes assembled from the databases. Table S2: candidate risk genes screened out by univariate Cox regression and PH assumption. Table S3: the GO result and GSEA result of the high- versus low-risk group. Figure S1: (a) Schoenfeld test plot for the visualization of the proportional hazard test for the ATG signature members, TRIM13, NPC1, and MUL1. (b) Forest plot for the adjustment of the ATG signature as an independent prognostic factor with the Age, Grade, and IDH1 mutation variables. (c) Heat map of the four clusters grouped by the expression of the signature members in the TCGA cohort. (d) Kaplan-Meier survival curve of the merged clusters based on similar survival and mutation status in the GEO cohort. (e) Bar plot for illustration of the varying IDH1 mutant/wild type ratio in the merged GEO clusters. (f) Boxplot for the estimation of the immune and stromal status of the two risk groups in the TCGA cohort. Figure S2: (a) Forest plot for the adjustment of the AIM-g model. (b) Schoenfeld test plot for the visualization of the proportional hazard test for the AIM-g model. [file 1872962.f1.zip › 1872962.f2.xlsx]

## Sheet: autophagy gene
ABL1	ABL2	AC022966.1	AC091230.1	ACER2	ADRA1A
ADRB2	AKT1	AMBRA1	APOL1	ARL13B	ARNT
ARSA	ARSB	ATF4	ATF6	ATG10	ATG101
ATG12	ATG13	ATG14	ATG16L1	ATG16L2	ATG2A
ATG2B	ATG3	ATG4A	ATG4B	ATG4C	ATG4D
ATG5	ATG7	ATG9A	ATG9B	ATIC	ATM
ATP13A2	ATP5IF1	ATP6V0A1	ATP6V0A2	ATP6V0B	ATP6V0C
ATP6V0D1	ATP6V0D2	ATP6V0E1	ATP6V0E2	ATP6V1A	ATP6V1B1
ATP6V1B2	ATP6V1C1	ATP6V1C2	ATP6V1D	ATP6V1E1	ATP6V1E2
ATP6V1G1	ATP6V1G2	ATP6V1H	BAD	BAG1	BAG3
BAK1	BAX	BCL2	BCL2L1	BCL2L11	BECN1
BECN2	BID	BIRC5	BIRC6	BMF	BNIP1
BNIP3	BNIP3L	BOK	C12orf44	C17orf88	C9orf72
CALCOCO2	CAMKK2	CANX	CAPN1	CAPN10	CAPN2
CAPNS1	CASP1	CASP3	CASP4	CASP8	CCL2
CCR2	CD46	CDC37	CDK5	CDK5R1	CDKN1A
CDKN1B	CDKN2A	CETN1	CFLAR	CFTR	CHMP2A
CHMP2B	CHMP3	CHMP4A	CHMP4B	CHMP4C	CHMP6
CHMP7	CISD2	CLEC16A	CLN3	CLU	CPTP
CSNK2A1	CSNK2A2	CSNK2B	CTSA	CTSB	CTSD
CTSL1	CTTN	CX3CL1	CXCR4	DAP	DAPK1
DAPK2	DAPK3	DAPL1	DCN	DDIT3	DEPP1
DHRSX	DIRAS3	DLC1	DNAJB1	DNAJB9	DNM1L
DRAM1	DRAM2	DYNC1H1	DYNC1I1	DYNC1I2	DYNC1LI1
DYNC1LI2	DYNLL1	DYNLL2	EDEM1	EEF1A1	EEF1A2
EEF2	EEF2K	EGFR	EIF2AK2	EIF2AK3	EIF2AK4
EIF2S1	EIF4EBP1	EIF4G1	EIF4G2	EP300	EPAS1
EPM2A	ERBB2	ERCC4	ERN1	ERO1L	EXOC1
EXOC4	EXOC7	EXOC8	FADD	FAM48A	FAS
FBXL2	FBXO7	FBXW7	FEZ1	FEZ2	FKBP1A
FKBP1B	FLCN	FOS	FOXK1	FOXK2	FOXO1
FOXO3	FUNDC1	FYCO1	FZD5	GAA	GABARAP
GABARAPL1	GABARAPL2	GAPDH	GATA4	GBA	GFAP
GNAI3	GNB2L1	GOLGA2	GOPC	GPSM1	GRID1
GRID2	GSK3A	GSK3B	HAX1	HBB	HDAC1
HDAC6	HERC1	HGF	HGS	HIF1A	HK2
HMGB1	HMGB4	HMOX1	HSF1	HSP90AA1	HSP90AB1
HSPA5	HSPA8	HSPB1	HSPB8	HTR2B	HTRA2
HTT	IFI16	IFNA1	IFNA10	IFNA13	IFNA14
IFNA16	IFNA17	IFNA2	IFNA21	IFNA4	IFNA5
IFNA6	IFNA7	IFNA8	IFNG	IFT20	IFT88
IKBKB	IKBKE	IKBKG	IL10	IL10RA	IL24
IL4	ILRUN	INS	IRGM	ITGA3	ITGA6
ITGB1	ITGB4	ITPR1	KAT5	KAT8	KDM4A
KDR	KEAP1	KIAA0226	KIAA0652	KIAA0831	KIAA1324
KIF25	KIF5B	KLHL22	KLHL24	KLHL3	LACRT
LAMP1	LAMP2	LAMP3	LAMTOR1	LAMTOR2	LAMTOR3
LAMTOR4	LAMTOR5	LARP1	LARS1	LEP	LEPR
LGALS8	LRRK2	LRSAM1	LZTS1	MAP1LC3A	MAP1LC3B
MAP1LC3C	MAP2K7	MAP3K7	MAPK1	MAPK15	MAPK3
MAPK8	MAPK8IP1	MAPK9	MAPT	MBTPS2	MCL1
MEFV	MET	MFN1	MFN2	MFSD8	MID2
MIR199A1	MIR199A2	MIRLET7B	MLST8	MT3	MTCL1
MTDH	MTERF3	MTM1	MTMR14	MTMR3	MTMR8
MTMR9	MTOR	MUL1	MVB12A	MVB12B	MYC
NAF1	NAMPT	NBR1	NCKAP1	NEDD4	NFE2L2
NFKB1	NKX2-3	NLRC4	NLRP6	NOD1	NPC1
NPRL2	NPRL3	NRBP2	NRG1	NRG2	NRG3
NUPR1	OPTN	OSBPL7	P4HB	PAFAH1B2	PARK2
PARK7	PARP1	PCNT	PEA15	PELP1	PEX14
PEX3	PEX5	PGAM5	PHF23	PIK3C3	PIK3CA
PIK3CB	PIK3R2	PIK3R4	PIKFYVE	PIM2	PINK1
PIP4K2A	PIP4K2B	PIP4K2C	PLEKHF1	PLIN2	PLIN3
PLK2	PLK3	POLDIP2	PPP1R15A	PRKAA1	PRKAA2
PRKAB1	PRKAB2	PRKACA	PRKAG1	PRKAG2	PRKAG3
PRKAR1A	PRKCD	PRKCQ	PRKD1	PRKN	PSAP
PTEN	PTK2	PTK6	PTPN22	PYCARD	QSOX1
RAB11A	RAB12	RAB1A	RAB1B	RAB24	RAB33B
RAB39B	RAB3GAP1	RAB3GAP2	RAB5A	RAB7A	RAB8A
RAC1	RAF1	RALB	RASIP1	RB1	RB1CC1
RELA	RETREG1	RGS19	RHEB	RIPK2	RMC1
RNASE1	RNF152	RNF41	RNF5	ROCK1	RPS27A
RPS6KB1	RPTOR	RRAGA	RRAGB	RRAGC	RRAGD
RUBCN	RUFY4	SAR1A	SCFD1	SCOC	SEC22B
SERPINA1	SESN1	SESN2	SESN3	SH3BP4	SH3GLB1
SIRT1	SIRT2	SLC38A9	SMCR8	SMURF1	SNCA
SNRNP70	SNX32	SNX5	SNX6	SOGA1	SOGA3
SPHK1	SPNS1	SPTLC1	SPTLC2	SQSTM1	SRC
SREBF1	SREBF2	ST13	STAT3	STBD1	STING1
STK11	STUB1	STX12	SUPT5H	SVIP	SYNPO2
TAB2	TAB3	TBC1D12	TBC1D14	TBC1D25	TBK1
TEX264	TFEB	TICAM1	TIGAR	TLK2	TM9SF1
TMEM150A	TMEM150B	TMEM150C	TMEM49	TMEM59	TMEM74
TNFSF10	TOMM20	TOMM22	TOMM40	TOMM5	TOMM6
TOMM7	TOMM70	TP53	TP53INP1	TP53INP2	TP63
TP73	TPCN1	TPCN2	TRAPPC8	TREM2	TRIB3
TRIM13	TRIM21	TRIM22	TRIM65	TRIM8	TSC1
TSC2	TSG101	TSPO	TUBA1A	TUBA1B	TUBA1C
TUBA3C	TUBA3D	TUBA3E	TUBA4A	TUBA4B	TUBA8
TUBAL3	TUBB1	TUBB2A	TUBB2B	TUBB3	TUBB4A
TUBB4B	TUBB6	TUBB8	TUBB8B	TUSC1	UBA52
UBAP1	UBB	UBC	UBE2N	UBE2V1	UBQLN1
UBQLN2	UBQLN4	UCHL1	ULK1	ULK2	ULK3
USP10	USP13	USP30	USP33	UVRAG	VAMP3
VAMP7	VCP	VDAC1	VEGFA	VIM	VMP1
VPS13C	VPS13D	VPS26A	VPS26B	VPS28	VPS35
VPS37A	VPS37B	VPS37C	VPS37D	WAC	WASHC1
WDFY3	WDR24	WDR41	WDR45	WDR45B	WDR45L
WDR6	WDR81	WIPI1	WIPI2	XBP1	XPA
ZC3H12A	ZFYVE1	ZKSCAN3	ZMPSTE24
