# Supplementary material for: Development of Autophagy Signature-Based Prognostic Nomogram for Refined Glioma Survival Prognostication
Source: Biomed Res Int. 2020 Sep 4;2020:1872962. doi: 10.1155/2020/1872962 (PMC7492900; doi:10.1155/2020/1872962)
Supplement: Supplementary Materials — . Table S1: a list of autophagy-related genes assembled from the databases. Table S2: candidate risk genes screened out by univariate Cox regression and PH assumption. Table S3: the GO result and GSEA result of the high- versus low-risk group. Figure S1: (a) Schoenfeld test plot for the visualization of the proportional hazard test for the ATG signature members, TRIM13, NPC1, and MUL1. (b) Forest plot for the adjustment of the ATG signature as an independent prognostic factor with the Age, Grade, and IDH1 mutation variables. (c) Heat map of the four clusters grouped by the expression of the signature members in the TCGA cohort. (d) Kaplan-Meier survival curve of the merged clusters based on similar survival and mutation status in the GEO cohort. (e) Bar plot for illustration of the varying IDH1 mutant/wild type ratio in the merged GEO clusters. (f) Boxplot for the estimation of the immune and stromal status of the two risk groups in the TCGA cohort. Figure S2: (a) Forest plot for the adjustment of the AIM-g model. (b) Schoenfeld test plot for the visualization of the proportional hazard test for the AIM-g model. [file 1872962.f1.zip › 1872962.f3.xlsx]

## Sheet: significant_univariate_blue.res
	beta	HR (95% CI)	z	wald.test	P-value	ph-test
XPA	-1.0077	0.365(0.261-0.5106)	-5.8847	34.63	3.98857e-09	0.801263
XBP1	0.4783	1.6133(1.2259-2.1233)	3.4132	11.65	0.000642155	0.521668
VPS37C	-0.8782	0.4155(0.2462-0.7014)	-3.2875	10.81	0.00101078	0.246775
VPS26B	-0.7811	0.4579(0.3258-0.6436)	-4.498	20.23	6.85913e-06	0.551337
UCHL1	0.2008	1.2223(1.072-1.3937)	2.9983	8.99	0.00271512	0.52554
UBQLN1	0.3362	1.3996(1.0049-1.9494)	1.989	3.96	0.0467052	0.442176
UBB	0.3768	1.4577(1.1358-1.8707)	2.9605	8.76	0.0030715	0.181765
UBAP1	-0.9148	0.4006(0.2835-0.566)	-5.1871	26.91	2.13558e-07	0.767825
TUBB6	0.2958	1.3442(1.2283-1.4709)	6.4334	41.39	1.24754e-10	0.292664
TUBA8	-1.2531	0.2856(0.1346-0.606)	-3.2652	10.66	0.00109392	0.0839905
TSG101	-0.811	0.4444(0.3202-0.6168)	-4.8489	23.51	1.24131e-06	0.154638
TRIM13	-0.6836	0.5048(0.4026-0.633)	-5.9192	35.04	3.23472e-09	0.437904
TM9SF1	0.6189	1.8569(1.3912-2.4785)	4.2009	17.65	2.65897e-05	0.72826
TIGAR	0.4024	1.4954(1.2826-1.7434)	5.1394	26.41	2.75647e-07	0.209089
ST13	-0.6768	0.5083(0.3904-0.6617)	-5.0267	25.27	4.99113e-07	0.554524
SESN2	0.49	1.6324(1.219-2.1858)	3.2895	10.82	0.00100361	0.209852
SEC22B	0.4928	1.6368(1.2063-2.2209)	3.1647	10.02	0.00155234	0.731709
RRAGA	-0.332	0.7175(0.5199-0.9902)	-2.02	4.08	0.0433847	0.0986149
RPS6KB1	-0.5847	0.5573(0.3764-0.8252)	-2.9192	8.52	0.00350896	0.0663854
RAB8A	0.6882	1.9901(1.4444-2.7422)	4.2082	17.71	2.57421e-05	0.85524
RAB3GAP2	0.485	1.6241(1.1281-2.3383)	2.6082	6.8	0.00910242	0.930285
RAB3GAP1	-1.0015	0.3673(0.2158-0.6253)	-3.6893	13.61	0.000224864	0.4697
RAB24	-0.5639	0.569(0.4087-0.7921)	-3.3409	11.16	0.000834999	0.170721
PRKAG2	-0.1729	0.8412(0.714-0.9912)	-2.0657	4.27	0.0388553	0.313491
PRKACA	0.9058	2.4738(1.3964-4.3824)	3.1044	9.64	0.00190669	0.797005
PRKAB2	-0.8135	0.4433(0.3197-0.6147)	-4.8776	23.79	1.07394e-06	0.235977
PIP4K2C	0.2876	1.3332(1.1433-1.5546)	3.6688	13.46	0.000243708	0.68276
PEX5	-1.0479	0.3507(0.2543-0.4836)	-6.3884	40.81	1.67625e-10	0.0761692
PEA15	-0.2313	0.7935(0.6587-0.9559)	-2.4352	5.93	0.0148817	0.404183
OSBPL7	-1.557	0.2108(0.1042-0.4265)	-4.3292	18.74	1.49669e-05	0.661825
NPRL2	-0.3173	0.7281(0.5306-0.9991)	-1.9653	3.86	0.0493839	0.384197
NPC1	0.3529	1.4231(1.0851-1.8665)	2.5501	6.5	0.0107691	0.301736
MVB12B	-0.4783	0.6198(0.4292-0.8952)	-2.5503	6.5	0.0107625	0.978466
MUL1	1.6272	5.0895(3.3347-7.7677)	7.5432	56.9	4.58519e-14	0.805181
MFSD8	0.314	1.3689(1.0086-1.8578)	2.0149	4.06	0.0439165	0.572554
LARS1	-0.4266	0.6527(0.4577-0.9309)	-2.3551	5.55	0.0185161	0.625033
LAMTOR5	0.7551	2.1279(1.6105-2.8116)	5.3126	28.22	1.08094e-07	0.0540349
KLHL3	-0.5949	0.5516(0.3591-0.8475)	-2.7156	7.37	0.00661616	0.897832
KDR	0.1817	1.1992(1.0364-1.3876)	2.4408	5.96	0.014655	0.741947
HTRA2	-0.7871	0.4552(0.3117-0.6647)	-4.074	16.6	4.6221e-05	0.395653
HSPA5	0.4759	1.6095(1.2833-2.0185)	4.1188	16.96	3.80888e-05	0.714813
HIF1A	0.5982	1.8189(1.3018-2.5414)	3.5058	12.29	0.000455297	0.401706
GSK3A	0.5263	1.6926(1.0002-2.8645)	1.9606	3.84	0.0499285	0.294312
FLCN	0.6589	1.9327(1.2268-3.0447)	2.8414	8.07	0.00449214	0.380611
FKBP1B	0.3591	1.4321(1.2035-1.7041)	4.0482	16.39	5.16118e-05	0.523063
FKBP1A	0.2933	1.3408(1.0674-1.6843)	2.52	6.35	0.0117348	0.325236
FADD	0.4745	1.6072(1.1898-2.1711)	3.0923	9.56	0.00198623	0.901494
ERBB2	0.6135	1.8468(1.3742-2.482)	4.0677	16.55	4.7489e-05	0.978556
EP300	-0.4101	0.6636(0.5235-0.8411)	-3.3901	11.49	0.000698607	0.145799
DYNLL2	0.4923	1.636(1.2812-2.089)	3.9468	15.58	7.92007e-05	0.139079
DDIT3	0.2835	1.3278(1.1664-1.5117)	4.286	18.37	1.81942e-05	0.580907
DAPL1	-0.2517	0.7775(0.682-0.8863)	-3.7665	14.19	0.000165521	0.675169
DAPK2	-0.6136	0.5414(0.2984-0.9824)	-2.0185	4.07	0.0435436	0.127493
CSNK2A2	-0.473	0.6231(0.4522-0.8587)	-2.8907	8.36	0.00384334	0.091296
CHMP2A	1.083	2.9534(2.1473-4.0622)	6.659	44.34	2.75611e-11	0.32887
CAPNS1	0.8217	2.2745(1.7332-2.9847)	5.9267	35.13	3.09054e-09	0.0839333
BOK	0.1306	1.1395(1.0021-1.2958)	1.9916	3.97	0.0464105	0.73272
BID	-0.3008	0.7402(0.6364-0.861)	-3.9001	15.21	9.61467e-05	0.0561865
BAX	0.3133	1.3679(1.1078-1.6891)	2.9113	8.48	0.00359891	0.769271
BAG1	-0.7074	0.4929(0.3492-0.6958)	-4.022	16.18	5.77025e-05	0.750775
ATP6V1G2	-0.3409	0.7111(0.6509-0.7768)	-7.5598	57.15	4.03718e-14	0.201715
ATP6V0A2	0.2486	1.2823(1.0201-1.6117)	2.1309	4.54	0.0331007	0.121476
ATM	-0.4081	0.6649(0.5363-0.8243)	-3.7218	13.85	0.000197846	0.664704
ATG2A	-0.7309	0.4815(0.3214-0.7213)	-3.5437	12.56	0.000394542	0.500715
ARNT	-0.8227	0.4393(0.2373-0.8131)	-2.6185	6.86	0.00883143	0.0812331
AMBRA1	-0.9481	0.3875(0.2111-0.7111)	-3.0607	9.37	0.00220856	0.145664
ADRA1A	-2.043	0.1296(0.0497-0.3381)	-4.1776	17.45	2.94542e-05	0.231482
