# Supplementary material for: Development of Autophagy Signature-Based Prognostic Nomogram for Refined Glioma Survival Prognostication
Source: Biomed Res Int. 2020 Sep 4;2020:1872962. doi: 10.1155/2020/1872962 (PMC7492900; doi:10.1155/2020/1872962)
Supplement: Supplementary Materials — . Table S1: a list of autophagy-related genes assembled from the databases. Table S2: candidate risk genes screened out by univariate Cox regression and PH assumption. Table S3: the GO result and GSEA result of the high- versus low-risk group. Figure S1: (a) Schoenfeld test plot for the visualization of the proportional hazard test for the ATG signature members, TRIM13, NPC1, and MUL1. (b) Forest plot for the adjustment of the ATG signature as an independent prognostic factor with the Age, Grade, and IDH1 mutation variables. (c) Heat map of the four clusters grouped by the expression of the signature members in the TCGA cohort. (d) Kaplan-Meier survival curve of the merged clusters based on similar survival and mutation status in the GEO cohort. (e) Bar plot for illustration of the varying IDH1 mutant/wild type ratio in the merged GEO clusters. (f) Boxplot for the estimation of the immune and stromal status of the two risk groups in the TCGA cohort. Figure S2: (a) Forest plot for the adjustment of the AIM-g model. (b) Schoenfeld test plot for the visualization of the proportional hazard test for the AIM-g model. [file 1872962.f1.zip › 1872962.f4.xlsx]

## Sheet: GEO_GO_BP_enrichiment_results
	ID	Description	GeneRatio	BgRatio	pvalue	p.adjust	qvalue	geneID	Count
GO:0043062	GO:0043062	extracellular structure organization	63/793	422/18670	2.05005e-18	1.0486e-14	8.2045e-15	ABCA5/ADAMTS9/AEBP1/ANXA2/APOC2/BCAN/CCN1/CD44/CLASP2/COL1A1/COL1A2/COL3A1/COL4A1/COL4A2/COL5A1/COL5A2/COL6A2/COL6A3/ECM2/EFEMP2/EMILIN1/FBLN5/FERMT1/FMOD/FN1/IBSP/ITGA3/ITGA7/ITGAM/ITGB2/ITGB5/LAMA2/LAMB1/LAMB2/LAMC1/LIPG/LOX/LOXL1/LUM/NCAN/NPNT/NR2E1/NTN4/PDPN/PLA2G2A/PLOD1/PLOD2/PLOD3/PLTP/POSTN/PTX3/SDC4/SERPINE1/SERPINH1/SOAT1/SPP1/TGFB2/TGFBI/TIMP1/TNC/TNFRSF11B/TNFRSF1A/VCAM1	63
GO:0030198	GO:0030198	extracellular matrix organization	56/793	368/18670	7.20688e-17	1.84316e-13	1.44213e-13	ADAMTS9/AEBP1/ANXA2/BCAN/CCN1/CD44/CLASP2/COL1A1/COL1A2/COL3A1/COL4A1/COL4A2/COL5A1/COL5A2/COL6A2/COL6A3/ECM2/EFEMP2/EMILIN1/FBLN5/FERMT1/FMOD/FN1/IBSP/ITGA3/ITGA7/ITGAM/ITGB2/ITGB5/LAMA2/LAMB1/LAMB2/LAMC1/LOX/LOXL1/LUM/NCAN/NPNT/NR2E1/NTN4/PDPN/PLOD1/PLOD2/PLOD3/POSTN/PTX3/SERPINE1/SERPINH1/SPP1/TGFB2/TGFBI/TIMP1/TNC/TNFRSF11B/TNFRSF1A/VCAM1	56
GO:0050808	GO:0050808	synapse organization	59/793	408/18670	1.1826e-16	2.01633e-13	1.57763e-13	ACTN1/ADGRB3/AMIGO2/BCAN/BSN/C1QB/C1QC/C1QL1/C3/C5AR1/CACNG2/CAST/CDK5R1/COL4A1/CTTNBP2/CUX2/DKK1/DNER/DNM3/DSCAM/EFNB2/EPHB1/FCGR2B/FLRT1/GABRB3/GABRG2/IGSF21/INA/ITGA3/ITGAM/LAMB2/LRP4/LRRC4/LRRC4C/LRRN1/LRRTM1/LRRTM2/MAPT/MYOT/NDRG1/NRP1/NRXN1/NRXN2/OXTR/PAK3/PPFIA2/SEZ6L/SHANK2/SIPA1L1/SLITRK1/SLITRK5/SRPX2/TLR2/TNC/TPBG/TREM2/WASF1/ZC4H2/ZNF804A	59
GO:0031589	GO:0031589	cell-substrate adhesion	49/793	354/18670	2.71373e-13	3.47018e-10	2.71516e-10	ACTN1/ADAM9/ADAMTS9/ANGPT1/BCR/CCN1/CD44/CDH13/CLASP2/COL1A1/COL3A1/ECM2/EMILIN1/EPHB1/FBLN5/FERMT1/FLNA/FN1/FZD7/GBP1/IQGAP1/ITGA3/ITGA7/ITGB2/ITGB5/ITGBL1/LAMB1/LAMB2/LAMC1/LGALS1/MDK/NPNT/NRP1/NTN4/PDPN/PIK3R1/PLAU/POSTN/PPFIA2/PRKCZ/PRKX/S100A10/SDC4/SERPINE1/SPOCK1/TNFRSF12A/TRIP6/VCAM1/VEGFA	49
GO:0042063	GO:0042063	gliogenesis	40/793	290/18670	4.8664e-11	4.97833e-08	3.89517e-08	ANXA1/ASCL1/BACE2/BMP2/C5AR1/CCL2/CDK5R1/CXCR4/DLL1/DNER/GPR17/GPR183/LAMA2/LAMB1/LAMB2/LIF/LPAR1/MAPT/MDK/MT3/MXRA8/NDN/NDRG1/NFIB/NKX2-2/NOG/NR2E1/OLIG2/PLP1/S100A8/SOX11/SOX4/SOX6/SOX8/TGFB2/TLR2/TREM2/TSPO/VIM/ZNF488	40
GO:0042119	GO:0042119	neutrophil activation	54/793	498/18670	2.59758e-10	2.21444e-07	1.73263e-07	ADA2/ADGRE5/ANXA2/BCR/BST2/C3/C5AR1/CD14/CD44/CD53/CD58/CHI3L1/CLEC5A/CTSC/CXCL8/CYSTM1/FCER1G/FCGR2B/FPR1/FUCA2/GLIPR1/GPR84/HSPA6/IQGAP1/ITGAM/ITGB2/LAIR1/LTF/MGST1/MVP/NPC2/PLAU/PLAUR/PTX3/PYCARD/PYGL/RNASE2/S100A11/S100A8/S100A9/SERPINA1/SERPINA3/SERPINB1/SERPINB6/SLC2A3/SLC2A5/SNAP25/STBD1/TCIRG1/TLR2/TMBIM1/TNFAIP6/TYROBP/VAMP8	54
GO:0030199	GO:0030199	collagen fibril organization	16/793	54/18670	4.48861e-10	3.27989e-07	2.56627e-07	AEBP1/ANXA2/COL1A1/COL1A2/COL3A1/COL5A1/COL5A2/EMILIN1/FMOD/LOX/LUM/PLOD1/PLOD2/PLOD3/SERPINH1/TGFB2	16
GO:0043312	GO:0043312	neutrophil degranulation	52/793	485/18670	8.40401e-10	4.96964e-07	3.88838e-07	ADA2/ADGRE5/ANXA2/BCR/BST2/C3/C5AR1/CD14/CD44/CD53/CD58/CHI3L1/CLEC5A/CTSC/CYSTM1/FCER1G/FPR1/FUCA2/GLIPR1/GPR84/HSPA6/IQGAP1/ITGAM/ITGB2/LAIR1/LTF/MGST1/MVP/NPC2/PLAU/PLAUR/PTX3/PYCARD/PYGL/RNASE2/S100A11/S100A8/S100A9/SERPINA1/SERPINA3/SERPINB1/SERPINB6/SLC2A3/SLC2A5/SNAP25/STBD1/TCIRG1/TLR2/TMBIM1/TNFAIP6/TYROBP/VAMP8	52
GO:0010001	GO:0010001	glial cell differentiation	32/793	218/18670	8.74424e-10	4.96964e-07	3.88838e-07	ASCL1/BACE2/BMP2/C5AR1/CXCR4/DLL1/DNER/GPR17/LAMA2/LAMB2/LIF/LPAR1/MAPT/MDK/MT3/MXRA8/NDRG1/NFIB/NKX2-2/NOG/NR2E1/OLIG2/PLP1/S100A8/SOX11/SOX4/SOX6/SOX8/TLR2/TREM2/VIM/ZNF488	32
GO:0002283	GO:0002283	neutrophil activation involved in immune response	52/793	488/18670	1.0447e-09	5.34363e-07	4.18099e-07	ADA2/ADGRE5/ANXA2/BCR/BST2/C3/C5AR1/CD14/CD44/CD53/CD58/CHI3L1/CLEC5A/CTSC/CYSTM1/FCER1G/FPR1/FUCA2/GLIPR1/GPR84/HSPA6/IQGAP1/ITGAM/ITGB2/LAIR1/LTF/MGST1/MVP/NPC2/PLAU/PLAUR/PTX3/PYCARD/PYGL/RNASE2/S100A11/S100A8/S100A9/SERPINA1/SERPINA3/SERPINB1/SERPINB6/SLC2A3/SLC2A5/SNAP25/STBD1/TCIRG1/TLR2/TMBIM1/TNFAIP6/TYROBP/VAMP8	52
GO:0010038	GO:0010038	response to metal ion	43/793	364/18670	1.35214e-09	6.28745e-07	4.91946e-07	ABAT/ADAM9/AKR1C3/ALOX5AP/ANXA5/AQP1/ASCL1/CA2/CACNG2/CAV1/CCND1/CD14/CNGA3/CYBRD1/FIBIN/HAMP/HMOX1/IGFBP2/IQGAP1/ITPKB/KCNK3/MAOB/MAPT/MT1E/MT1F/MT1G/MT1M/MT3/NDRG1/P2RX7/RYR3/S100A13/S100A16/S100A8/SERPINF1/SLC25A24/SLC6A1/SYT1/SYT4/TCIRG1/TNFRSF11B/TSPO/VCAM1	43
GO:0007160	GO:0007160	cell-matrix adhesion	32/793	225/18670	1.9592e-09	8.35108e-07	6.5341e-07	ACTN1/ADAM9/ADAMTS9/BCR/CD44/CDH13/CLASP2/COL3A1/ECM2/EMILIN1/FBLN5/FERMT1/FN1/IQGAP1/ITGA3/ITGA7/ITGB2/ITGB5/ITGBL1/NPNT/NRP1/PIK3R1/PLAU/POSTN/PPFIA2/PRKCZ/S100A10/SDC4/SERPINE1/TRIP6/VCAM1/VEGFA	32
GO:0002446	GO:0002446	neutrophil mediated immunity	52/793	499/18670	2.27728e-09	8.96021e-07	7.01069e-07	ADA2/ADGRE5/ANXA2/BCR/BST2/C3/C5AR1/CD14/CD44/CD53/CD58/CHI3L1/CLEC5A/CTSC/CYSTM1/FCER1G/FPR1/FUCA2/GLIPR1/GPR84/HSPA6/IQGAP1/ITGAM/ITGB2/LAIR1/LTF/MGST1/MVP/NPC2/PLAU/PLAUR/PTX3/PYCARD/PYGL/RNASE2/S100A11/S100A8/S100A9/SERPINA1/SERPINA3/SERPINB1/SERPINB6/SLC2A3/SLC2A5/SNAP25/STBD1/TCIRG1/TLR2/TMBIM1/TNFAIP6/TYROBP/VAMP8	52
GO:0007409	GO:0007409	axonogenesis	49/793	468/18670	5.72463e-09	1.98849e-06	1.55585e-06	ALCAM/ATL1/CDK5R1/CELSR3/CHL1/CRMP1/CXCR4/CYFIP2/DOK6/DSCAM/EFNB2/EPHB1/FGF13/FN1/GRB10/LAMA2/LAMB2/LINGO1/LRP4/LRRC4C/MAP2/MAPT/MT3/MYOT/NDN/NFIB/NOG/NR2E1/NRP1/NRXN1/NTN4/OLFM1/OMG/PAK3/PIK3R1/RNF165/RPS6KA5/S100A6/SHC1/SIPA1L1/SLITRK1/SLITRK5/SPP1/STXBP1/TNFRSF12A/UNC5A/UST/VAX2/VEGFA	49
GO:0060560	GO:0060560	developmental growth involved in morphogenesis	32/793	235/18670	5.83135e-09	1.98849e-06	1.55585e-06	ALCAM/CDK5R1/CXCR4/CYFIP2/DSCAM/FGF13/FLRT1/FN1/IMPACT/IQGAP1/LAMB2/MAP2/MAPT/MT3/NDN/NRP1/OLFM1/POSTN/PRKCZ/RDH10/RIMS2/SH3GL2/SPP1/SPRY1/SPRY2/SYT1/SYT4/TNC/TNFRSF12A/VEGFA/WASF1/YAP1	32
GO:0050900	GO:0050900	leukocyte migration	51/793	499/18670	6.28631e-09	2.00965e-06	1.5724e-06	ANGPT1/ANXA1/BCR/C5AR1/CAV1/CCL2/CCL20/CCR1/CD200/CD44/CD58/CD74/CHGA/COL1A1/COL1A2/CXCL10/CXCL14/CXCL8/CXCR4/EMILIN1/FCER1G/FN1/GPR183/HMOX1/HRH1/ITGA3/ITGAM/ITGB2/MDK/MSN/MSTN/PIK3R1/PLCB1/PODXL2/PROS1/PYCARD/RARRES2/S100A8/S100A9/SDC2/SDC4/SERPINE1/SHC1/SLC16A3/SLC7A7/SWAP70/TGFB2/TREM1/TREM2/VCAM1/VEGFA	51
GO:0007416	GO:0007416	synapse assembly	27/793	177/18670	7.80121e-09	2.34725e-06	1.83655e-06	ADGRB3/AMIGO2/BSN/CUX2/DKK1/DNER/DNM3/DSCAM/EFNB2/EPHB1/FLRT1/GABRB3/GABRG2/LRP4/LRRC4/LRRN1/LRRTM1/LRRTM2/NRXN1/NRXN2/OXTR/SHANK2/SLITRK1/SLITRK5/SRPX2/TLR2/TPBG	27
GO:0048708	GO:0048708	astrocyte differentiation	17/793	81/18670	4.01887e-08	1.1233e-05	8.78896e-06	BACE2/BMP2/C5AR1/DLL1/LAMB2/LIF/MAPT/MT3/NKX2-2/NOG/NR2E1/PLP1/S100A8/SOX6/SOX8/TREM2/VIM	17
GO:0010975	GO:0010975	regulation of neuron projection development	49/793	499/18670	4.47704e-08	1.1233e-05	8.78896e-06	ADGRB3/CDK5R1/CNTN1/CRMP1/CSMD3/CUX2/CXCR4/DKK1/DNM3/DSCAM/EFNB2/FGF13/FN1/IQGAP1/ITGA3/LGALS1/LINGO1/LPAR1/LRP4/LRRC4C/MAP2/MAPT/MDK/MT3/NR2E1/NRP1/OLFM1/OMG/PAK3/PMP22/RAP2A/RIMS2/S100A9/SDC2/SERPINF1/SHANK2/SIPA1L1/SLITRK1/SNAP25/SPOCK1/SPP1/STMN2/SYT1/SYT4/TNFRSF12A/UST/VEGFA/VIM/ZNF804A	49
GO:0050890	GO:0050890	cognition	35/793	296/18670	4.55385e-08	1.1233e-05	8.78896e-06	ADGRB3/ASIC1/BRINP1/C1QL1/C5AR1/CEBPB/CHD7/CHL1/CUX2/DGKI/DKK1/FGF13/GATM/HLA-DRA/HRH1/ITGA3/JPH3/JPH4/MAPT/MDK/NRXN1/NRXN2/OXTR/PAK5/PLCB1/PRKCZ/SCN2A/SERPINF1/SHANK2/SLC6A1/SNAP25/SYT4/TAFA2/TLR2/TUSC3	35
GO:1990138	GO:1990138	neuron projection extension	25/793	168/18670	4.61178e-08	1.1233e-05	8.78896e-06	ALCAM/CDK5R1/CXCR4/CYFIP2/DSCAM/FLRT1/FN1/IMPACT/IQGAP1/LAMB2/MAP2/MAPT/MT3/NDN/NRP1/OLFM1/POSTN/PRKCZ/RIMS2/SH3GL2/SYT1/SYT4/TNFRSF12A/VEGFA/WASF1	25
GO:0070372	GO:0070372	regulation of ERK1 and ERK2 cascade	35/793	300/18670	6.37977e-08	1.4833e-05	1.16057e-05	AKAP12/ANGPT1/BMP2/C5AR1/CCL2/CCL20/CCN1/CCR1/CD44/CD74/CHI3L1/CHRNA9/DUSP26/EMILIN1/EPHB1/ERRFI1/FN1/GBP1/GPNMB/GPR183/LIF/MT3/NDRG2/NPNT/NRP1/PLA2G2A/PLA2G5/PRKCZ/PYCARD/RRAS/SHC1/SPRY1/SPRY2/SPRY4/TREM2	35
GO:0070371	GO:0070371	ERK1 and ERK2 cascade	36/793	317/18670	8.2361e-08	1.83164e-05	1.43312e-05	AKAP12/ANGPT1/BMP2/C5AR1/CCL2/CCL20/CCN1/CCR1/CD44/CD74/CHI3L1/CHRNA9/DUSP26/EMILIN1/EPHB1/ERRFI1/FN1/GBP1/GPNMB/GPR183/LIF/MT3/NDRG2/NPNT/NRP1/OXTR/PLA2G2A/PLA2G5/PRKCZ/PYCARD/RRAS/SHC1/SPRY1/SPRY2/SPRY4/TREM2	36
GO:0021782	GO:0021782	glial cell development	20/793	116/18670	8.61935e-08	1.837e-05	1.43732e-05	ASCL1/BACE2/C5AR1/DLL1/LAMB2/LPAR1/MAPT/MDK/MT3/MXRA8/NDRG1/NKX2-2/PLP1/S100A8/SOX11/SOX4/TLR2/TREM2/VIM/ZNF488	20
GO:0032103	GO:0032103	positive regulation of response to external stimulus	36/793	323/18670	1.32083e-07	2.70242e-05	2.11444e-05	C3/C5AR1/CCR1/CD74/CDH13/CEBPB/CTSC/CXCL10/CXCL14/CXCL8/CXCR4/DSCAM/F3/FCER1G/LPAR1/LY96/MDK/MSTN/MYD88/NEAT1/NFKBIZ/NRP1/NUPR1/OSMR/PDE2A/PLA2G2A/RARRES2/S100A8/S100A9/SERPINE1/SWAP70/TLR2/TNFRSF1A/TREM2/VAMP8/VEGFA	36
GO:0050769	GO:0050769	positive regulation of neurogenesis	46/793	474/18670	1.64443e-07	3.23511e-05	2.53123e-05	ASCL1/BMP2/BRINP1/CNTN1/CUX2/CXCR4/DKK1/DMRTA2/DSCAM/FLNA/FN1/IMPACT/IQGAP1/ITGA3/LIF/LPAR1/MAPT/MDK/MMD2/NAP1L2/NEUROD1/NKX2-2/NRP1/OLIG2/PAK3/RIMS2/S100A9/SERPINF1/SH3GL3/SHANK2/SLITRK1/SOX11/SOX8/STMN2/SYT1/SYT4/TCF12/TLR2/TNFRSF12A/TREM2/TSPO/VEGFA/ZC4H2/ZEB1/ZNF488/ZNF804A	46
GO:0022604	GO:0022604	regulation of cell morphogenesis	46/793	484/18670	3.00831e-07	5.59377e-05	4.37671e-05	ADGRB3/ANXA1/ARHGAP18/CCL2/CD44/CDK5R1/CUX2/CXCR4/DNM3/DSCAM/FGF13/FLNA/FN1/GBP1/ITGA7/ITGB2/LINGO1/LPAR1/LRP4/LRRC4C/MAP2/MAPT/MDK/MSN/MT3/NR2E1/NRP1/OLFM1/OMG/PAK3/PDPN/POSTN/RAP2A/RHOJ/RIMS2/S100A10/S100A13/SDC2/SIPA1L1/SLITRK1/SPP1/SYT1/SYT4/TNFRSF12A/UST/VEGFA	46
GO:0007178	GO:0007178	transmembrane receptor protein serine/threonine kinase signaling pathway	37/793	349/18670	3.14321e-07	5.59377e-05	4.37671e-05	ACVR1C/ADAM9/ASPN/ATOH8/BMP2/CAV1/CAV2/CCN1/COL1A2/COL3A1/DKK1/EMILIN1/FERMT1/FGF9/FMOD/FSTL1/GDF15/ITGA3/ITGB5/LOX/MSTN/NOG/NPNT/PRKCZ/RGMB/RNF165/SFRP4/SIRT1/SOX11/TGFB2/TMEM100/TWSG1/VASN/VIM/WWTR1/ZEB1/ZNF423	37
GO:0001822	GO:0001822	kidney development	32/793	278/18670	3.17144e-07	5.59377e-05	4.37671e-05	ACTA2/ADAMTS1/ANGPT1/BASP1/BMP2/CA2/DLL1/EFNB2/EYA1/IQGAP1/IRX2/ITGA3/LAMB2/LIF/LRP4/NOG/NPNT/NRP1/PCSK5/PRKX/RDH10/RGN/SDC4/SERPINF1/SOX11/SOX4/SOX8/SPRY1/TGFB2/VEGFA/WWTR1/YAP1	32
GO:0072001	GO:0072001	renal system development	33/793	293/18670	3.44936e-07	5.88115e-05	4.60156e-05	ACTA2/ADAMTS1/ANGPT1/BASP1/BMP2/CA2/COL4A1/DLL1/EFNB2/EYA1/IQGAP1/IRX2/ITGA3/LAMB2/LIF/LRP4/NOG/NPNT/NRP1/PCSK5/PRKX/RDH10/RGN/SDC4/SERPINF1/SOX11/SOX4/SOX8/SPRY1/TGFB2/VEGFA/WWTR1/YAP1	33
GO:0001503	GO:0001503	ossification	40/793	398/18670	4.3027e-07	7.09946e-05	5.55479e-05	ASPN/BMP2/CCN1/CCR1/CEBPB/CEBPD/CLEC5A/CLIC1/COL1A1/COL1A2/COL5A2/CTHRC1/DHRS3/DKK1/FGF9/GPNMB/IBSP/IGFBP3/IGFBP5/LOX/LRP4/LTF/MDK/MGP/MN1/NOG/NPNT/P2RX7/RIPPLY2/SMOC1/SNX10/SOX11/SOX8/SPP1/TCIRG1/TGFB2/TNC/TWIST1/TWSG1/WWTR1	40
GO:0002576	GO:0002576	platelet degranulation	20/793	128/18670	4.5371e-07	7.25227e-05	5.67436e-05	ACTN1/ANXA5/F13A1/FCER1G/FLNA/FN1/LGALS3BP/LHFPL2/PROS1/RARRES2/SCG3/SERPINA1/SERPINA3/SERPINE1/SERPING1/STXBP1/TAGLN2/TGFB2/TIMP1/VEGFA	20
GO:0010810	GO:0010810	regulation of cell-substrate adhesion	27/793	215/18670	4.73349e-07	7.33692e-05	5.74059e-05	CCN1/CDH13/CLASP2/COL1A1/ECM2/EMILIN1/FERMT1/FLNA/FN1/FZD7/GBP1/IQGAP1/ITGA3/LGALS1/MDK/NPNT/NRP1/PDPN/PIK3R1/PLAU/POSTN/PRKCZ/S100A10/SDC4/SERPINE1/SPOCK1/VEGFA	27
GO:0007611	GO:0007611	learning or memory	30/793	256/18670	5.03247e-07	7.57091e-05	5.92367e-05	ADGRB3/ASIC1/BRINP1/C1QL1/CEBPB/CUX2/DGKI/DKK1/FGF13/GATM/HRH1/ITGA3/JPH3/JPH4/MAPT/MDK/NRXN1/NRXN2/OXTR/PAK5/PLCB1/PRKCZ/SCN2A/SERPINF1/SHANK2/SLC6A1/SNAP25/SYT4/TAFA2/TLR2	30
GO:0010721	GO:0010721	negative regulation of cell development	36/793	344/18670	6.20395e-07	8.86305e-05	6.93468e-05	ASCL1/BRINP1/CDK5R1/COL3A1/CRMP1/DKK1/DLL1/DLL3/DNM3/EFNB2/FGF13/GBP1/LGALS1/LINGO1/LPAR1/LRP4/LTF/MAP2/MT3/NKX2-2/NOG/NR2E1/NRP1/OLIG2/OMG/PMP22/POSTN/SOX11/SOX8/SPOCK1/SPP1/STMN2/SYT4/TSPO/VEGFA/VIM	36
GO:0051961	GO:0051961	negative regulation of nervous system development	34/793	315/18670	6.23793e-07	8.86305e-05	6.93468e-05	ASCL1/BRINP1/CDK5R1/COL3A1/CRMP1/CTSC/DKK1/DLL1/DLL3/DNM3/EFNB2/FGF13/LGALS1/LINGO1/LPAR1/LRP4/MAP2/MT3/NKX2-2/NOG/NR2E1/NRP1/OLIG2/OMG/PMP22/SOX11/SOX8/SPOCK1/SPP1/STMN2/SYT4/TLR2/TSPO/VIM	34
GO:0001655	GO:0001655	urogenital system development	35/793	330/18670	6.4785e-07	8.95609e-05	7.00747e-05	ACTA2/ADAMTS1/ANGPT1/ANXA1/BASP1/BMP2/CA2/COL4A1/DLL1/EFNB2/EYA1/IQGAP1/IRX2/ITGA3/LAMB2/LIF/LRP4/NOG/NPNT/NRP1/PCSK5/PRKX/RDH10/RGN/SDC4/SERPINF1/SOX11/SOX4/SOX8/SPRY1/TGFB2/TNC/VEGFA/WWTR1/YAP1	35
GO:0050804	GO:0050804	modulation of chemical synaptic transmission	42/793	436/18670	6.9249e-07	9.32129e-05	7.29321e-05	ABAT/AKAP12/ASIC1/BCR/CA2/CACNG2/CCL2/CPLX1/CUX2/DGKI/DKK1/EPHB1/FGF14/GNAI1/HRH1/JPH3/JPH4/KCNB1/LAMA2/LRRC4/LRRC4C/LRRTM1/LRRTM2/MAPT/NR2E1/NRXN1/OXTR/PLAT/PLCB1/PLCB4/PLCL1/PPFIA2/PRKCZ/RIMS2/SHANK2/SIPA1L1/SLC6A1/SNAP25/STXBP1/SYT1/SYT4/TYROBP	42
GO:0099177	GO:0099177	regulation of trans-synaptic signaling	42/793	437/18670	7.35747e-07	9.39334e-05	7.34958e-05	ABAT/AKAP12/ASIC1/BCR/CA2/CACNG2/CCL2/CPLX1/CUX2/DGKI/DKK1/EPHB1/FGF14/GNAI1/HRH1/JPH3/JPH4/KCNB1/LAMA2/LRRC4/LRRC4C/LRRTM1/LRRTM2/MAPT/NR2E1/NRXN1/OXTR/PLAT/PLCB1/PLCB4/PLCL1/PPFIA2/PRKCZ/RIMS2/SHANK2/SIPA1L1/SLC6A1/SNAP25/STXBP1/SYT1/SYT4/TYROBP	42
GO:0002526	GO:0002526	acute inflammatory response	27/793	220/18670	7.49654e-07	9.39334e-05	7.34958e-05	C1QB/C1QC/C1R/C1S/C3/C5AR1/CD163/CEBPB/CFB/CFI/F3/FCER1G/FCGR2B/FN1/HAMP/NUPR1/OSMR/PLSCR1/PROS1/S100A8/SERPINA1/SERPINA3/SERPING1/SUSD4/TREM1/VCAM1/VSIG4	27
GO:1901342	GO:1901342	regulation of vasculature development	41/793	422/18670	7.52936e-07	9.39334e-05	7.34958e-05	ADAMTS9/ADGRB3/ADM/ANGPTL4/ANXA1/AQP1/C3/C5AR1/CHI3L1/COL4A2/CXCL10/CXCL8/CXCR4/DLL1/EFNB2/EMILIN1/F3/FGF9/GPNMB/HK2/HMOX1/HOXA5/HTATIP2/ITGB2/MDK/MEOX2/NR2E1/NRP1/RHOJ/RRAS/SERPINE1/SERPINF1/SIRT1/SOD2/SPRY2/SRPX2/TGFB2/TMEM100/TNFRSF12A/TWIST1/VEGFA	41
GO:0048588	GO:0048588	developmental cell growth	28/793	234/18670	7.88078e-07	9.59767e-05	7.50946e-05	ALCAM/CDK5R1/CXCR4/CYFIP2/DSCAM/FGF13/FLRT1/FN1/HAMP/IMPACT/IQGAP1/LAMB2/MAP2/MAPT/MT3/NDN/NRP1/OLFM1/POSTN/PRKCZ/RIMS2/SH3GL2/SPP1/SYT1/SYT4/TNFRSF12A/VEGFA/WASF1	28
GO:0051965	GO:0051965	positive regulation of synapse assembly	14/793	68/18670	8.09039e-07	9.6238e-05	7.5299e-05	ADGRB3/AMIGO2/CUX2/EPHB1/FLRT1/LRRN1/LRRTM1/LRRTM2/NRXN1/OXTR/SLITRK1/SLITRK5/SRPX2/TPBG	14
GO:0050768	GO:0050768	negative regulation of neurogenesis	32/793	295/18670	1.192e-06	0.00013857	0.00010842	ASCL1/BRINP1/CDK5R1/COL3A1/CRMP1/DKK1/DLL1/DLL3/DNM3/EFNB2/FGF13/LGALS1/LINGO1/LPAR1/LRP4/MAP2/MT3/NKX2-2/NOG/NR2E1/NRP1/OLIG2/OMG/PMP22/SOX11/SOX8/SPOCK1/SPP1/STMN2/SYT4/TSPO/VIM	32
GO:0050663	GO:0050663	cytokine secretion	28/793	240/18670	1.31367e-06	0.000148392	0.000116106	AKAP12/ANGPT1/ANXA1/CARD16/CASP1/CD14/CD200/CD58/CHI3L1/CLEC5A/FCGR2B/FERMT1/FN1/GBP1/IFIH1/LCP2/MDK/P2RX7/POSTN/PRKCZ/PYCARD/S100A13/SCAMP5/SERPINB1/TCIRG1/TLR1/TLR2/TWIST1	28
GO:1990778	GO:1990778	protein localization to cell periphery	33/793	311/18670	1.33451e-06	0.000148392	0.000116106	ANXA2/CACNG2/CAV1/CLASP2/CPLX1/DPP10/DPP6/FCER1G/FGF13/FLNA/GBP1/GNAI1/GPR158/ITGA3/KCNB1/PID1/PIK3R1/PRKCZ/RAB34/RAB3C/RAP2A/S100A10/SAPCD2/SCN3B/SNAP25/STXBP1/TMBIM1/TNFRSF1A/TREM2/VAMP5/VAMP8/ZDHHC22/ZDHHC23	33
GO:0045666	GO:0045666	positive regulation of neuron differentiation	37/793	371/18670	1.40004e-06	0.000152366	0.000119215	ASCL1/BMP2/BRINP1/CNTN1/CUX2/CXCR4/DKK1/DSCAM/FN1/IMPACT/IQGAP1/ITGA3/LPAR1/MAPT/MDK/MMD2/NAP1L2/NEUROD1/NKX2-2/NRP1/PAK3/RIMS2/S100A9/SERPINF1/SH3GL3/SHANK2/SLITRK1/SOX11/STMN2/SYT1/SYT4/TCF12/TNFRSF12A/VEGFA/ZC4H2/ZEB1/ZNF804A	37
GO:0071559	GO:0071559	response to transforming growth factor beta	29/793	255/18670	1.44319e-06	0.00015379	0.000120329	ACVR1C/ADAM9/ASPN/CAV1/CAV2/COL1A1/COL1A2/COL3A1/COL4A2/EMILIN1/FERMT1/FMOD/GDF15/ITGA3/ITGB5/LOX/MSTN/MXRA5/NPNT/PDE2A/POSTN/PRKCZ/SIRT1/SOX11/SOX6/TGFB2/TWSG1/VASN/ZEB1	29
GO:0050673	GO:0050673	epithelial cell proliferation	41/793	434/18670	1.54931e-06	0.000161729	0.000126541	ANG/ATOH8/BMP2/C5AR1/CAV1/CAV2/CCL2/CCND1/CDH13/CEBPB/EFNB2/ERRFI1/EYA1/F3/FABP7/FERMT1/FGF9/FZD7/HMOX1/HOXA5/IGFBP3/IGFBP5/LAMB1/LAMC1/MDK/NFIB/NOG/NRP1/NUPR1/PRKX/RGN/RICTOR/SERPINB1/SERPINF1/SIRT1/SOX11/TGFB2/TWIST1/VEGFA/YAP1/ZFP36	41
GO:0051346	GO:0051346	negative regulation of hydrolase activity	43/793	466/18670	1.60633e-06	0.000164328	0.000128574	ANGPTL4/ANXA1/AQP1/ARFGEF3/BIRC3/BST2/C3/CARD16/CAST/CD44/COL6A3/CSRNP3/CSTA/DGKI/ELFN2/IQGAP1/LTF/MAP2/MT3/PHACTR3/PLAUR/PRKCZ/PROS1/PTX3/RARRES1/RGN/SERPINA1/SERPINA3/SERPINB1/SERPINB6/SERPINE1/SERPINF1/SERPING1/SERPINH1/SIRT1/SPOCD1/SPOCK1/SPRY1/SPRY2/TGFB2/TIMP1/TNFAIP8/VEGFA	43
GO:0010043	GO:0010043	response to zinc ion	12/793	53/18670	1.69913e-06	0.000170413	0.000133335	CA2/HAMP/KCNK3/MT1E/MT1F/MT1G/MT1M/MT3/P2RX7/S100A8/TSPO/VCAM1	12
GO:0052547	GO:0052547	regulation of peptidase activity	42/793	452/18670	1.77454e-06	0.000173203	0.000135518	ACVR1C/AQP1/BIRC3/BST2/C3/CARD16/CASP1/CASP4/CAST/CAV1/CCN1/CD44/COL6A3/CSTA/CYFIP2/F3/FAS/FN1/LTF/MAPT/MT3/PCOLCE/PCOLCE2/PLAUR/PROS1/PYCARD/RARRES1/S100A8/S100A9/SERPINA1/SERPINA3/SERPINB1/SERPINB6/SERPINE1/SERPINF1/SERPING1/SERPINH1/SIRT1/SPOCK1/TIMP1/TNFAIP8/VEGFA	42
GO:1904018	GO:1904018	positive regulation of vasculature development	27/793	230/18670	1.79467e-06	0.000173203	0.000135518	ADM/ANGPTL4/ANXA1/AQP1/C3/C5AR1/CHI3L1/CXCL8/CXCR4/DLL1/EFNB2/F3/HK2/HMOX1/ITGB2/MDK/NR2E1/NRP1/RHOJ/RRAS/SERPINE1/SIRT1/SOD2/SRPX2/TMEM100/TWIST1/VEGFA	27
GO:0010769	GO:0010769	regulation of cell morphogenesis involved in differentiation	32/793	301/18670	1.84756e-06	0.000175005	0.000136928	ADGRB3/CDK5R1/CUX2/DNM3/DSCAM/FGF13/FLNA/FN1/GBP1/LINGO1/LRP4/LRRC4C/MAP2/MAPT/MDK/MT3/NR2E1/NRP1/OLFM1/OMG/PAK3/PDPN/POSTN/RAP2A/S100A10/SDC2/SIPA1L1/SLITRK1/SPP1/TNFRSF12A/UST/VEGFA	32
GO:0007613	GO:0007613	memory	18/793	117/18670	2.12866e-06	0.000197966	0.000154893	ASIC1/BRINP1/CEBPB/CUX2/FGF13/HRH1/ITGA3/JPH3/MAPT/MDK/OXTR/PAK5/PLCB1/PRKCZ/SCN2A/SERPINF1/SYT4/TAFA2	18
GO:0098883	GO:0098883	synapse pruning	6/793	11/18670	2.21674e-06	0.000202475	0.000158422	C1QB/C1QC/C3/DKK1/ITGAM/TREM2	6
GO:0071560	GO:0071560	cellular response to transforming growth factor beta stimulus	28/793	249/18670	2.72576e-06	0.000242335	0.000189609	ACVR1C/ADAM9/ASPN/CAV1/CAV2/COL1A1/COL1A2/COL3A1/COL4A2/EMILIN1/FERMT1/FMOD/GDF15/ITGA3/ITGB5/LOX/MSTN/NPNT/PDE2A/POSTN/PRKCZ/SIRT1/SOX11/SOX6/TGFB2/TWSG1/VASN/ZEB1	28
GO:0090287	GO:0090287	regulation of cellular response to growth factor stimulus	31/793	292/18670	2.74789e-06	0.000242335	0.000189609	ASPN/CAV1/CAV2/CCN1/CYFIP2/DKK1/DLL1/EMILIN1/FERMT1/FGF9/FSTL1/GRB10/ITGA3/LOX/MT3/MYOF/NOG/NPNT/RNF165/SFRP4/SIRT1/SOX11/SPRY1/SPRY2/SPRY4/TWSG1/VASN/VEGFA/WASF1/ZEB1/ZNF423	31
GO:0045765	GO:0045765	regulation of angiogenesis	37/793	383/18670	2.97265e-06	0.000257713	0.000201641	ADAMTS9/ADGRB3/ADM/ANGPTL4/ANXA1/AQP1/C3/C5AR1/CHI3L1/COL4A2/CXCL10/CXCL8/CXCR4/DLL1/EMILIN1/F3/GPNMB/HK2/HMOX1/HOXA5/HTATIP2/ITGB2/MDK/MEOX2/NR2E1/NRP1/RHOJ/RRAS/SERPINE1/SERPINF1/SIRT1/SPRY2/SRPX2/TGFB2/TNFRSF12A/TWIST1/VEGFA	37
GO:0097529	GO:0097529	myeloid leukocyte migration	25/793	210/18670	3.33607e-06	0.0002844	0.000222522	ANXA1/C5AR1/CCL2/CCL20/CCR1/CD200/CD74/CHGA/CXCL10/CXCL8/EMILIN1/FCER1G/HRH1/ITGB2/MDK/MSTN/PLCB1/RARRES2/S100A8/S100A9/SERPINE1/SWAP70/TGFB2/TREM2/VEGFA	25
GO:0001649	GO:0001649	osteoblast differentiation	26/793	225/18670	3.72241e-06	0.000312133	0.000244221	BMP2/CCN1/CEBPB/CEBPD/CLEC5A/CLIC1/COL1A1/CTHRC1/FGF9/GPNMB/IBSP/IGFBP3/IGFBP5/LOX/LTF/NOG/NPNT/SMOC1/SOX11/SOX8/SPP1/TCIRG1/TNC/TWIST1/TWSG1/WWTR1	26
GO:0045785	GO:0045785	positive regulation of cell adhesion	38/793	403/18670	3.89526e-06	0.000321359	0.000251439	ADAM9/ANGPT1/ANXA1/CAV1/CCL2/CCN1/CD44/CD74/CDH13/DUSP26/ECM2/EFNB2/EMILIN1/FERMT1/FLNA/FN1/HLA-DMB/IBSP/IGFBP2/IQGAP1/ITGA3/ITGB2/ITPKB/LGALS1/MDK/NFKBIZ/NPNT/NRP1/PAK3/PDPN/PIK3R1/PRKCZ/PYCARD/S100A10/SDC4/TGFB2/VCAM1/VEGFA	38
GO:0002791	GO:0002791	regulation of peptide secretion	44/793	500/18670	4.23262e-06	0.000340205	0.000266185	ABAT/ABCC8/ACVR1C/ADAM9/AKAP12/ANG/ANGPT1/ANXA1/ANXA5/CARD16/CASP1/CD14/CD200/CD58/CD74/CHD7/CHGA/CLEC5A/ENHO/FCGR2B/FERMT1/FN1/GBP1/IFIH1/KCNB1/MDK/NEUROD1/P2RX7/POSTN/PRKCZ/PYCARD/RAPGEF4/S100A8/SCAMP5/SERPINB1/SNAP25/SOX4/SYT4/TCIRG1/TGFB2/TLR1/TLR2/TREM2/TWIST1	44
GO:1901214	GO:1901214	regulation of neuron death	32/793	313/18670	4.25672e-06	0.000340205	0.000266185	ANGPT1/ASCL1/C5AR1/CCL2/CD200/CDK5R1/CEBPB/CHGA/CHL1/DKK1/EFNB2/EPHB1/FCGR2B/GABRB3/GPNMB/HMOX1/ITGAM/ITGB2/KCNB1/MAPT/MDK/MT3/NRP1/NUPR1/PAK3/SERPINF1/SIRT1/SOD2/STXBP1/TGFB2/TOX3/TYROBP	32
GO:0050921	GO:0050921	positive regulation of chemotaxis	19/793	135/18670	4.36573e-06	0.000343549	0.000268802	C5AR1/CCR1/CD74/CDH13/CXCL10/CXCL14/CXCL8/CXCR4/DSCAM/F3/LPAR1/MDK/MSTN/NRP1/RARRES2/SERPINE1/SWAP70/TREM2/VEGFA	19
GO:0070482	GO:0070482	response to oxygen levels	37/793	394/18670	5.72271e-06	0.000432602	0.000338479	ABAT/ACAA2/ADM/ANG/ANGPTL4/AQP1/BMP2/CARD16/CAV1/COL1A1/CXCR4/FAS/HILPDA/HK2/HMOX1/KCND2/KCNK3/LDHA/LPAR1/MGARP/MT3/NDRG1/OXTR/PDLIM1/PLAT/PLAU/PLOD1/PLOD2/POSTN/SCN2A/SIRT1/TGFB2/TLR2/TWIST1/VASN/VCAM1/VEGFA	37
GO:0030323	GO:0030323	respiratory tube development	22/793	176/18670	5.78902e-06	0.000432602	0.000338479	ASCL1/CHI3L1/ERRFI1/FGF9/HOXA5/IGFBP5/ITGA3/LIF/LOX/NFIB/NOG/PCSK5/PDPN/PLOD3/RDH10/SOX11/SPRY1/SPRY2/TNC/VEGFA/YAP1/ZFPM2	22
GO:0007517	GO:0007517	muscle organ development	38/793	410/18670	5.82968e-06	0.000432602	0.000338479	BASP1/BMP2/CAV1/CAV2/CHD7/COL3A1/COL6A3/CXCL10/DKK1/DLL1/DMRTA2/DNER/EFNB2/EPHB1/FGF9/FZD7/HAMP/HLF/ITGA7/LAMA2/LIF/LOX/MEOX2/MSTN/MYBPC1/NOG/NUPR1/SIRT1/SOX11/SOX6/SOX8/TAGLN/TCF12/TGFB2/TWIST1/VAMP5/YAP1/ZFPM2	38
GO:0070997	GO:0070997	neuron death	34/793	348/18670	5.83569e-06	0.000432602	0.000338479	ANGPT1/ASCL1/C5AR1/CCL2/CD200/CDK5R1/CEBPB/CHGA/CHL1/DKK1/DPYSL4/EFNB2/EPHB1/FCGR2B/GABRB3/GPNMB/HMOX1/ITGAM/ITGB2/KCNB1/MAPT/MDK/MT3/NRP1/NUPR1/PAK3/SCN2A/SERPINF1/SIRT1/SOD2/STXBP1/TGFB2/TOX3/TYROBP	34
GO:0060425	GO:0060425	lung morphogenesis	11/793	50/18670	6.20103e-06	0.000453118	0.000354531	HOXA5/LIF/NFIB/NOG/PLOD3/RDH10/SOX11/SPRY1/SPRY2/TNC/YAP1	11
GO:0045766	GO:0045766	positive regulation of angiogenesis	24/793	204/18670	6.40208e-06	0.000461221	0.000360871	ADM/ANGPTL4/ANXA1/AQP1/C3/C5AR1/CHI3L1/CXCL8/CXCR4/DLL1/F3/HK2/HMOX1/ITGB2/MDK/NR2E1/NRP1/RHOJ/RRAS/SERPINE1/SIRT1/SRPX2/TWIST1/VEGFA	24
GO:0051047	GO:0051047	positive regulation of secretion	39/793	428/18670	6.58636e-06	0.000467906	0.000366101	ABAT/ADAM9/AKAP12/ANG/AQP1/CASP1/CD14/CD58/CLASP2/CLEC5A/FCER1G/FERMT1/IFIH1/ITGAM/ITGB2/KCNB1/MDK/OXTR/P2RX7/POSTN/PRKCZ/PYCARD/S100A8/SCAMP5/SCIN/SDC4/SLC6A1/SOX11/SOX4/SPP1/STXBP1/SYT1/SYT4/TGFB2/TLR1/TLR2/TREM2/TWIST1/VAMP8	39
GO:0007229	GO:0007229	integrin-mediated signaling pathway	16/793	103/18670	6.82811e-06	0.000478436	0.00037434	ADAM9/ADAMTS1/COL3A1/FCER1G/FERMT1/FLNA/ITGA3/ITGA7/ITGAM/ITGB2/ITGB5/ITGBL1/NRP1/PLP1/TIMP1/TYROBP	16
GO:0016049	GO:0016049	cell growth	42/793	484/18670	9.83598e-06	0.000679149	0.000531383	ALCAM/BST2/CDK5R1/CXCR4/CYFIP2/DSCAM/FBLN5/FGF13/FLRT1/FN1/GNG4/HAMP/IGFBP3/IGFBP5/IMPACT/IQGAP1/LAMB2/MAP2/MAPT/MT3/NDN/NET1/NRP1/OLFM1/PAK5/POSTN/PRKCZ/PSRC1/RIMS2/S100A8/S100A9/SH3GL2/SIRT1/SPOCK1/SPP1/SYT1/SYT4/TGFB2/TMEM97/TNFRSF12A/VEGFA/WASF1	42
GO:0051963	GO:0051963	regulation of synapse assembly	16/793	106/18670	9.9582e-06	0.000679149	0.000531383	ADGRB3/AMIGO2/CUX2/DKK1/EPHB1/FLRT1/LRRN1/LRRTM1/LRRTM2/NRXN1/OXTR/SLITRK1/SLITRK5/SRPX2/TLR2/TPBG	16
GO:0002685	GO:0002685	regulation of leukocyte migration	23/793	196/18670	1.03531e-05	0.000696792	0.000545187	ANXA1/BCR/C5AR1/CCL2/CCL20/CCR1/CD200/CD74/CXCL10/CXCL14/CXCL8/EMILIN1/HMOX1/MDK/MSN/MSTN/PLCB1/PYCARD/RARRES2/SERPINE1/SWAP70/TREM2/VEGFA	23
GO:0050707	GO:0050707	regulation of cytokine secretion	24/793	210/18670	1.05233e-05	0.000699045	0.00054695	AKAP12/ANGPT1/ANXA1/CARD16/CASP1/CD14/CD200/CD58/CLEC5A/FCGR2B/FERMT1/FN1/GBP1/IFIH1/MDK/P2RX7/POSTN/PRKCZ/PYCARD/SCAMP5/SERPINB1/TLR1/TLR2/TWIST1	24
GO:0002237	GO:0002237	response to molecule of bacterial origin	33/793	343/18670	1.10095e-05	0.00072197	0.000564888	ADAM9/ADM/AKAP12/BCR/C5AR1/CARD16/CASP1/CCL2/CD14/CEBPB/CXCL10/CXCL8/FCGR2B/GJB2/GNG12/HAMP/LITAF/LOXL1/LTF/LY96/MAOB/MGST1/P2RX7/PYCARD/S100A8/SERPINE1/TLR1/TLR2/TREM2/TSPO/VCAM1/VIM/ZFP36	33
GO:0045665	GO:0045665	negative regulation of neuron differentiation	25/793	225/18670	1.13642e-05	0.000735794	0.000575704	ASCL1/CDK5R1/CRMP1/DKK1/DLL1/DNM3/EFNB2/FGF13/LGALS1/LINGO1/LPAR1/LRP4/MAP2/MT3/NKX2-2/NR2E1/NRP1/OLIG2/OMG/PMP22/SOX8/SPOCK1/SPP1/STMN2/VIM	25
GO:0014002	GO:0014002	astrocyte development	10/793	44/18670	1.20473e-05	0.000763601	0.000597461	BACE2/C5AR1/DLL1/LAMB2/MAPT/MT3/PLP1/S100A8/TREM2/VIM	10
GO:0050708	GO:0050708	regulation of protein secretion	41/793	472/18670	1.22335e-05	0.000763601	0.000597461	ABAT/ABCC8/ACVR1C/ADAM9/AKAP12/ANG/ANGPT1/ANXA1/ANXA5/CARD16/CASP1/CD14/CD200/CD58/CHGA/CLEC5A/ENHO/FCGR2B/FERMT1/FN1/GBP1/IFIH1/KCNB1/MDK/NEUROD1/P2RX7/POSTN/PRKCZ/PYCARD/RAPGEF4/SCAMP5/SERPINB1/SNAP25/SOX4/SYT4/TCIRG1/TGFB2/TLR1/TLR2/TREM2/TWIST1	41
GO:0060541	GO:0060541	respiratory system development	23/793	198/18670	1.22415e-05	0.000763601	0.000597461	ASCL1/BASP1/CHD7/CHI3L1/ERRFI1/FGF9/HOXA5/IGFBP5/ITGA3/LIF/LOX/NFIB/NOG/PDPN/PLOD3/RDH10/SOX11/SPRY1/SPRY2/TNC/VEGFA/YAP1/ZFPM2	23
GO:0090092	GO:0090092	regulation of transmembrane receptor protein serine/threonine kinase signaling pathway	26/793	241/18670	1.29506e-05	0.000798103	0.000624456	ASPN/BMP2/CAV1/CAV2/CCN1/DKK1/EMILIN1/FERMT1/FGF9/FSTL1/GDF15/ITGA3/LOX/MSTN/NOG/NPNT/RNF165/SFRP4/SIRT1/SOX11/TGFB2/TWSG1/VASN/WWTR1/ZEB1/ZNF423	26
GO:0052548	GO:0052548	regulation of endopeptidase activity	38/793	425/18670	1.32848e-05	0.000800228	0.000626119	ACVR1C/AQP1/BIRC3/BST2/C3/CARD16/CASP1/CASP4/CAST/CCN1/CD44/COL6A3/CSTA/CYFIP2/F3/FAS/LTF/MAPT/MT3/PLAUR/PROS1/PYCARD/RARRES1/S100A8/S100A9/SERPINA1/SERPINA3/SERPINB1/SERPINB6/SERPINE1/SERPINF1/SERPING1/SERPINH1/SIRT1/SPOCK1/TIMP1/TNFAIP8/VEGFA	38
GO:0007179	GO:0007179	transforming growth factor beta receptor signaling pathway	23/793	199/18670	1.3298e-05	0.000800228	0.000626119	ACVR1C/ADAM9/ASPN/CAV1/CAV2/COL1A2/COL3A1/EMILIN1/FERMT1/FMOD/GDF15/ITGA3/ITGB5/LOX/MSTN/NPNT/PRKCZ/SIRT1/SOX11/TGFB2/TWSG1/VASN/ZEB1	23
GO:0030324	GO:0030324	lung development	21/793	172/18670	1.35288e-05	0.000804651	0.00062958	ASCL1/CHI3L1/ERRFI1/FGF9/HOXA5/IGFBP5/ITGA3/LIF/LOX/NFIB/NOG/PDPN/PLOD3/RDH10/SOX11/SPRY1/SPRY2/TNC/VEGFA/YAP1/ZFPM2	21
GO:0061448	GO:0061448	connective tissue development	28/793	273/18670	1.57547e-05	0.000926271	0.000724737	ACTA2/ANXA2/BMP2/CCN1/CD44/CHI3L1/COL1A1/COL5A1/COL6A2/COL6A3/EFEMP1/FGF9/HOXA5/LOX/LUM/MDK/MGP/NFIB/NOG/PLAAT3/SCIN/SERPINH1/SIRT1/SOX6/SOX8/TGFBI/TIMP1/ZEB1	28
GO:0030900	GO:0030900	forebrain development	35/793	381/18670	1.63476e-05	0.000950206	0.000743465	AQP1/ASCL1/ATAT1/BCAN/BCL2A1/BMP2/CDK5R1/CHD7/COL3A1/CRTAC1/CXCR4/DKK1/DMRTA2/FABP7/FGF13/FLNA/GNAO1/GNG12/ITGAM/LAMB1/LPAR1/MDK/NEUROD1/NFIB/NOG/NR2E1/NRP1/OLIG2/OXTR/PLCB1/SLITRK5/TACC2/TWSG1/TYROBP/VAX2	35
GO:0002683	GO:0002683	negative regulation of immune system process	40/793	463/18670	1.76821e-05	0.001011	0.000791034	ANGPT1/ANXA1/BCR/BST2/C1QC/CCL2/CD14/CD200/CD74/CEBPB/COL3A1/DLL1/EMILIN1/FCER1G/FCGR2B/GBP1/GPNMB/GPR17/H4C3/HMOX1/HOXA5/IL13RA2/ITPKB/LTF/LY96/MDK/NMI/PIK3R1/PLCB1/SAMSN1/SDC4/SERPING1/SOX11/TGFB2/TMEM176A/TMEM176B/TWSG1/TYROBP/VSIG4/ZFP36	40
GO:0072659	GO:0072659	protein localization to plasma membrane	27/793	260/18670	1.77889e-05	0.001011	0.000791034	ANXA2/CLASP2/DPP10/DPP6/FCER1G/FGF13/FLNA/GBP1/GPR158/ITGA3/KCNB1/PID1/PIK3R1/PRKCZ/RAB34/RAB3C/RAP2A/S100A10/SCN3B/STXBP1/TMBIM1/TNFRSF1A/TREM2/VAMP5/VAMP8/ZDHHC22/ZDHHC23	27
GO:0031623	GO:0031623	receptor internalization	16/793	111/18670	1.80774e-05	0.00101611	0.000795028	ADM/ANGPT1/CACNG2/CAV1/CXCL8/DKK1/DNM3/EFNB2/FCER1G/ITGB2/LRRTM1/LRRTM2/SFRP4/SH3GL2/SNAP25/VEGFA	16
GO:0030278	GO:0030278	regulation of ossification	23/793	203/18670	1.83995e-05	0.00102297	0.000800398	BMP2/CCN1/CCR1/CEBPB/CEBPD/CLIC1/CTHRC1/DHRS3/DKK1/IGFBP5/LRP4/LTF/MDK/MGP/NOG/NPNT/P2RX7/SMOC1/SOX11/TCIRG1/TGFB2/TWIST1/TWSG1	23
GO:0046717	GO:0046717	acid secretion	17/793	124/18670	1.95697e-05	0.00107383	0.000840195	ABAT/ABCC3/ANXA1/CPLX1/OXTR/P2RX7/PLA2G2A/PLA2G5/PPFIA2/SLC1A1/SLC6A1/SNAP25/SNX10/STXBP1/SYT1/SYT4/TSPOAP1	17
GO:0050807	GO:0050807	regulation of synapse organization	24/793	218/18670	1.97342e-05	0.00107383	0.000840195	ADGRB3/AMIGO2/CDK5R1/CTTNBP2/CUX2/DKK1/DNM3/EPHB1/FCGR2B/FLRT1/LRP4/LRRN1/LRRTM1/LRRTM2/NRXN1/OXTR/PAK3/SIPA1L1/SLITRK1/SLITRK5/SRPX2/TLR2/TPBG/ZNF804A	24
GO:0099173	GO:0099173	postsynapse organization	20/793	163/18670	2.00412e-05	0.00107906	0.000844284	ACTN1/CDK5R1/CUX2/DNM3/EPHB1/FCGR2B/INA/ITGA3/LRP4/LRRC4/LRRTM1/LRRTM2/NDRG1/NRP1/NRXN1/NRXN2/PAK3/SHANK2/SIPA1L1/ZNF804A	20
GO:0042391	GO:0042391	regulation of membrane potential	38/793	434/18670	2.12371e-05	0.00112764	0.000882298	ABAT/ASIC1/ATP1A3/CACNG2/CAV1/CHRNA9/CLIC1/CNIH3/CUX2/DGKI/FGF12/FGF13/FGF14/FLNA/GABBR1/GABRA3/GABRB3/GABRG2/GRIA3/KCNB1/KCND2/KCNH8/KCNK3/KCNN2/KCNT2/MAPT/NALCN/NRXN1/P2RX7/PID1/PRKCZ/RIMS2/SCN2A/SCN3A/SCN3B/SHANK2/TREM2/TSPO	38
GO:0036293	GO:0036293	response to decreased oxygen levels	34/793	370/18670	2.13845e-05	0.00112764	0.000882298	ABAT/ACAA2/ADM/ANG/ANGPTL4/AQP1/BMP2/CARD16/CAV1/CXCR4/HILPDA/HK2/HMOX1/KCND2/KCNK3/LDHA/MGARP/MT3/NDRG1/OXTR/PDLIM1/PLAT/PLAU/PLOD1/PLOD2/POSTN/SCN2A/SIRT1/TGFB2/TLR2/TWIST1/VASN/VCAM1/VEGFA	34
GO:0010951	GO:0010951	negative regulation of endopeptidase activity	26/793	250/18670	2.46624e-05	0.00128723	0.00100716	AQP1/BIRC3/BST2/C3/CARD16/CAST/CD44/COL6A3/CSTA/LTF/MT3/PLAUR/PROS1/RARRES1/SERPINA1/SERPINA3/SERPINB1/SERPINB6/SERPINE1/SERPINF1/SERPING1/SERPINH1/SPOCK1/TIMP1/TNFAIP8/VEGFA	26
GO:1901654	GO:1901654	response to ketone	22/793	193/18670	2.52843e-05	0.00130636	0.00102213	AKR1C3/AQP1/CAV1/CCND1/ERRFI1/FBXO32/FIBIN/GJB2/GNAI1/MAOB/MSN/MSTN/NKX2-2/OXTR/SERPINF1/SIRT1/SPP1/TGFB2/TLR2/TNC/TSPO/YAP1	22
GO:0030193	GO:0030193	regulation of blood coagulation	13/793	79/18670	2.61773e-05	0.00132829	0.00103929	ABAT/ANXA2/ANXA5/CAV1/F3/FCER1G/PDPN/PLAT/PLAU/PLAUR/PROS1/SERPINE1/SERPING1	13
GO:0021537	GO:0021537	telencephalon development	26/793	251/18670	2.643e-05	0.00132829	0.00103929	AQP1/ASCL1/ATAT1/BCAN/BCL2A1/BMP2/CDK5R1/CHD7/COL3A1/CRTAC1/CXCR4/DMRTA2/FGF13/FLNA/GNG12/LAMB1/LPAR1/MDK/NEUROD1/NFIB/NR2E1/NRP1/OXTR/PLCB1/SLITRK5/TACC2	26
GO:0001818	GO:0001818	negative regulation of cytokine production	29/793	296/18670	2.64913e-05	0.00132829	0.00103929	ANGPT1/ANXA1/BST2/CARD16/CD200/DLL1/ERRFI1/FCGR2B/FN1/GBP1/GPNMB/HERC5/HMOX1/IFIH1/LTF/NDRG2/NMI/PYCARD/RNF135/RPS6KA5/SERPINB1/TGFB2/TREM2/TSPO/TWIST1/TWSG1/TYROBP/VSIG4/ZFP36	29
GO:0030100	GO:0030100	regulation of endocytosis	28/793	281/18670	2.67477e-05	0.00132829	0.00103929	ANGPT1/ANXA2/APOC2/BCR/C3/CAV1/CCL2/CD14/CDH13/DKK1/DLL1/EFNB2/FCER1G/FCGR2B/LRRTM1/LRRTM2/PTX3/PYCARD/SCAMP5/SERPINE1/SFRP4/SH3GL2/SH3GL3/SNAP91/SYT4/TLR2/TREM2/VEGFA	28
GO:0050729	GO:0050729	positive regulation of inflammatory response	19/793	153/18670	2.70754e-05	0.00133164	0.00104191	C3/CEBPB/CTSC/FCER1G/MDK/MYD88/NEAT1/NFKBIZ/NUPR1/OSMR/PDE2A/PLA2G2A/S100A8/S100A9/SERPINE1/TLR2/TNFRSF1A/TREM2/VAMP8	19
GO:0001666	GO:0001666	response to hypoxia	33/793	359/18670	2.7972e-05	0.00136263	0.00106616	ABAT/ACAA2/ADM/ANG/ANGPTL4/AQP1/BMP2/CARD16/CAV1/CXCR4/HILPDA/HK2/HMOX1/KCND2/KCNK3/LDHA/MGARP/MT3/NDRG1/PDLIM1/PLAT/PLAU/PLOD1/PLOD2/POSTN/SCN2A/SIRT1/TGFB2/TLR2/TWIST1/VASN/VCAM1/VEGFA	33
GO:0033690	GO:0033690	positive regulation of osteoblast proliferation	5/793	10/18670	2.87857e-05	0.00138905	0.00108683	BMP2/CCN1/CTHRC1/LTF/SOX8	5
GO:0051048	GO:0051048	negative regulation of secretion	25/793	238/18670	2.97174e-05	0.0014206	0.00111152	ABAT/ACVR1C/ANGPT1/ANXA1/ANXA5/ASIC1/BCR/CARD16/CD200/CD74/CHGA/ENHO/FCGR2B/FN1/GBP1/HMOX1/IL13RA2/KCNB1/LIF/MAOB/OXTR/SERPINB1/SYT4/TNFRSF1A/VAMP8	25
GO:1900046	GO:1900046	regulation of hemostasis	13/793	80/18670	3.00587e-05	0.00142361	0.00111387	ABAT/ANXA2/ANXA5/CAV1/F3/FCER1G/PDPN/PLAT/PLAU/PLAUR/PROS1/SERPINE1/SERPING1	13
GO:0030595	GO:0030595	leukocyte chemotaxis	24/793	224/18670	3.08821e-05	0.00144919	0.00113388	ANXA1/C5AR1/CCL2/CCL20/CCR1/CD74/CHGA/CXCL10/CXCL14/CXCL8/CXCR4/FCER1G/GPR183/HRH1/ITGB2/MDK/MSTN/RARRES2/S100A8/S100A9/SERPINE1/SWAP70/TGFB2/VEGFA	24
GO:0032496	GO:0032496	response to lipopolysaccharide	31/793	330/18670	3.20788e-05	0.00148361	0.00116082	ADAM9/ADM/AKAP12/BCR/C5AR1/CARD16/CASP1/CCL2/CD14/CEBPB/CXCL10/CXCL8/GJB2/GNG12/HAMP/LITAF/LOXL1/LTF/LY96/MAOB/MGST1/P2RX7/PYCARD/S100A8/SERPINE1/TLR2/TREM2/TSPO/VCAM1/VIM/ZFP36	31
GO:0010977	GO:0010977	negative regulation of neuron projection development	19/793	155/18670	3.25106e-05	0.00148361	0.00116082	CDK5R1/CRMP1/DKK1/DNM3/EFNB2/FGF13/LGALS1/LINGO1/LPAR1/LRP4/MAP2/MT3/NRP1/OMG/PMP22/SPOCK1/SPP1/STMN2/VIM	19
GO:0014812	GO:0014812	muscle cell migration	15/793	104/18670	3.25643e-05	0.00148361	0.00116082	ADAMTS1/ANXA1/FGF9/IGFBP3/IGFBP5/IQGAP1/LPAR1/MDK/MSTN/NET1/NRP1/PLAT/PLAU/POSTN/SERPINE1	15
GO:0071294	GO:0071294	cellular response to zinc ion	7/793	23/18670	3.27758e-05	0.00148361	0.00116082	KCNK3/MT1E/MT1F/MT1G/MT1M/MT3/TSPO	7
GO:0050678	GO:0050678	regulation of epithelial cell proliferation	34/793	378/18670	3.31626e-05	0.00148796	0.00116421	ANG/ATOH8/BMP2/C5AR1/CAV1/CAV2/CCL2/CCND1/CDH13/EFNB2/ERRFI1/EYA1/F3/FGF9/FZD7/HMOX1/HOXA5/LAMB1/LAMC1/MDK/NFIB/NOG/NRP1/NUPR1/RGN/RICTOR/SERPINF1/SIRT1/SOX11/TGFB2/TWIST1/VEGFA/YAP1/ZFP36	34
GO:1903531	GO:1903531	negative regulation of secretion by cell	23/793	211/18670	3.42007e-05	0.00152119	0.00119022	ABAT/ACVR1C/ANGPT1/ANXA1/ANXA5/ASIC1/BCR/CARD16/CD200/CHGA/ENHO/FCGR2B/FN1/GBP1/HMOX1/IL13RA2/KCNB1/LIF/MAOB/SERPINB1/SYT4/TNFRSF1A/VAMP8	23
GO:0006898	GO:0006898	receptor-mediated endocytosis	30/793	316/18670	3.51436e-05	0.00154965	0.00121249	ADM/ANGPT1/ANXA2/APOC2/C3/CACNG2/CAV1/CAV2/CD14/CD163/CXCL8/DKK1/DLL1/DNM3/EFNB2/FCER1G/FCGR2B/FCHSD2/ITGAM/ITGB2/LRRTM1/LRRTM2/SERPINE1/SFRP4/SH3GL2/SH3GL3/SNAP25/SNAP91/VEGFA/WASF1	30
GO:0030856	GO:0030856	regulation of epithelial cell differentiation	19/793	156/18670	3.55768e-05	0.00155535	0.00121694	ASCL1/ATOH8/CAV1/CCND1/CEBPB/DLL1/ERRFI1/LIF/PLAAT4/PRKX/SERPINE1/SFRP4/TMEM100/TNFRSF1A/VEGFA/WWTR1/YAP1/ZEB1/ZFP36	19
GO:0050803	GO:0050803	regulation of synapse structure or activity	24/793	227/18670	3.83542e-05	0.00166256	0.00130083	ADGRB3/AMIGO2/CDK5R1/CTTNBP2/CUX2/DKK1/DNM3/EPHB1/FCGR2B/FLRT1/LRP4/LRRN1/LRRTM1/LRRTM2/NRXN1/OXTR/PAK3/SIPA1L1/SLITRK1/SLITRK5/SRPX2/TLR2/TPBG/ZNF804A	24
GO:0001706	GO:0001706	endoderm formation	10/793	50/18670	3.96038e-05	0.0017023	0.00133192	COL4A2/COL5A1/COL5A2/DKK1/FN1/ITGA7/ITGB2/ITGB5/LAMB1/NOG	10
GO:0034341	GO:0034341	response to interferon-gamma	22/793	199/18670	4.05692e-05	0.00172926	0.00135302	AQP4/BST2/CASP1/CCL2/CCL20/CD44/CD58/GBP1/GBP2/GBP3/HLA-DQB1/HLA-DRA/IFI30/IFITM3/NMI/OAS1/PARP9/STXBP1/TLR2/TRIM22/VCAM1/VIM	22
GO:1903532	GO:1903532	positive regulation of secretion by cell	35/793	399/18670	4.28766e-05	0.00181251	0.00141815	ABAT/ADAM9/AKAP12/ANG/CASP1/CD14/CD58/CLASP2/CLEC5A/FCER1G/FERMT1/IFIH1/ITGAM/ITGB2/KCNB1/MDK/OXTR/P2RX7/POSTN/PRKCZ/PYCARD/SCAMP5/SDC4/SOX11/SOX4/SPP1/STXBP1/SYT1/SYT4/TGFB2/TLR1/TLR2/TREM2/TWIST1/VAMP8	35
GO:0060326	GO:0060326	cell chemotaxis	29/793	304/18670	4.32506e-05	0.00181333	0.0014188	ANXA1/C5AR1/CCL2/CCL20/CCR1/CD74/CHGA/CXCL10/CXCL14/CXCL8/CXCR4/EPHB1/FCER1G/GPR183/HRH1/ITGB2/LOX/LPAR1/MDK/MSTN/NRP1/RARRES2/S100A8/S100A9/SERPINE1/SWAP70/TGFB2/VCAM1/VEGFA	29
GO:0007162	GO:0007162	negative regulation of cell adhesion	28/793	289/18670	4.4291e-05	0.00183101	0.00143263	ABAT/ANGPT1/ANXA1/BMP2/CD74/CDH13/CEBPB/CLASP2/COL1A1/DSCAM/FCGR2B/FXYD5/FZD7/GBP1/GPNMB/LGALS1/MDK/PIK3R1/POSTN/SDC4/SERPINE1/SPOCK1/SWAP70/TGFBI/TNC/TWSG1/VEGFA/VSIG4	28
GO:0042476	GO:0042476	odontogenesis	17/793	132/18670	4.43881e-05	0.00183101	0.00143263	ADM/AQP1/ASPN/BMP2/CA2/COL1A1/COL1A2/GNAO1/LAMB1/LRP4/SERPINE1/SNX10/TCIRG1/TGFB2/TNC/TNFRSF11B/TWIST1	17
GO:0050727	GO:0050727	regulation of inflammatory response	40/793	485/18670	5.04665e-05	0.00205644	0.00160901	ANXA1/BCR/BIRC3/C1QB/C1QC/C1R/C1S/C3/C5AR1/CD200/CEBPB/CFB/CFI/CTSC/FCER1G/FCGR2B/GPR17/MDK/MYD88/NEAT1/NFKBIZ/NUPR1/OSMR/PDE2A/PLA2G2A/PROS1/PYCARD/RICTOR/S100A8/S100A9/SERPINE1/SERPINF1/SERPING1/SUSD4/TLR2/TNFAIP6/TNFRSF1A/TREM2/VAMP8/VSIG4	40
GO:0032060	GO:0032060	bleb assembly	5/793	11/18670	5.09265e-05	0.00205644	0.00160901	EMP1/EMP3/LPAR1/P2RX7/PMP22	5
GO:0050818	GO:0050818	regulation of coagulation	13/793	84/18670	5.10592e-05	0.00205644	0.00160901	ABAT/ANXA2/ANXA5/CAV1/F3/FCER1G/PDPN/PLAT/PLAU/PLAUR/PROS1/SERPINE1/SERPING1	13
GO:0031345	GO:0031345	negative regulation of cell projection organization	21/793	188/18670	5.1778e-05	0.0020691	0.00161891	CDK5R1/CRMP1/DKK1/DNM3/EFNB2/FGF13/ITGA3/LGALS1/LINGO1/LPAR1/LRP4/MAP2/MT3/NRP1/OMG/PMP22/SPOCK1/SPP1/SPRY2/STMN2/VIM	21
GO:0010811	GO:0010811	positive regulation of cell-substrate adhesion	16/793	121/18670	5.34254e-05	0.00211838	0.00165747	CCN1/CDH13/ECM2/EMILIN1/FERMT1/FLNA/FN1/IQGAP1/ITGA3/MDK/NPNT/NRP1/PRKCZ/S100A10/SDC4/VEGFA	16
GO:0097485	GO:0097485	neuron projection guidance	27/793	277/18670	5.43085e-05	0.00213683	0.00167191	ALCAM/CDK5R1/CELSR3/CHL1/CRMP1/CXCR4/CYFIP2/DOK6/DPYSL4/DSCAM/EFNB2/EPHB1/GRB10/LAMA2/LAMB2/MYOT/NFIB/NOG/NRP1/NRXN1/NTN4/PIK3R1/RNF165/RPS6KA5/SHC1/UNC5A/VEGFA	27
GO:0010466	GO:0010466	negative regulation of peptidase activity	26/793	262/18670	5.49632e-05	0.00214608	0.00167915	AQP1/BIRC3/BST2/C3/CARD16/CAST/CD44/COL6A3/CSTA/LTF/MT3/PLAUR/PROS1/RARRES1/SERPINA1/SERPINA3/SERPINB1/SERPINB6/SERPINE1/SERPINF1/SERPING1/SERPINH1/SPOCK1/TIMP1/TNFAIP8/VEGFA	26
GO:0043583	GO:0043583	ear development	23/793	219/18670	6.12803e-05	0.00237461	0.00185795	BCR/BMP2/C1QB/CEBPD/CHD7/CHRNA9/CTHRC1/CXCL14/DLL1/EYA1/FGF9/FZD6/GABRB3/GJB2/KCNK3/NEUROD1/NOG/RDH10/SDC4/SPRY2/TGFB2/TWIST1/ZEB1	23
GO:0071621	GO:0071621	granulocyte chemotaxis	16/793	123/18670	6.53238e-05	0.00251227	0.00196566	ANXA1/C5AR1/CCL2/CCL20/CD74/CXCL10/CXCL8/FCER1G/HRH1/ITGB2/MDK/MSTN/RARRES2/S100A8/S100A9/TGFB2	16
GO:0060537	GO:0060537	muscle tissue development	35/793	408/18670	6.74188e-05	0.00257349	0.00201356	ADAMTS9/BMP2/CAV1/CAV2/CHD7/COL3A1/CSRP1/CSRP2/DKK1/DLL1/DMRTA2/DNER/EFNB2/EPHB1/EYA1/FGF9/FZD7/HAMP/HLF/IGFBP5/LOX/MEOX2/MSTN/MYBPC1/NOG/NUPR1/SOX11/SOX6/SOX8/TGFB2/TWIST1/VAMP5/VEGFA/YAP1/ZFPM2	35
GO:0071711	GO:0071711	basement membrane organization	7/793	26/18670	7.8666e-05	0.00295865	0.00231492	CLASP2/COL4A1/FERMT1/LAMB1/LAMB2/NTN4/PLOD3	7
GO:1900120	GO:1900120	regulation of receptor binding	7/793	26/18670	7.8666e-05	0.00295865	0.00231492	ANXA2/CRTAC1/LOX/NOG/NRP1/PHLDA2/PLCL1	7
GO:0014047	GO:0014047	glutamate secretion	9/793	44/18670	7.99359e-05	0.00298447	0.00233512	CPLX1/P2RX7/PPFIA2/SLC1A1/SNAP25/STXBP1/SYT1/SYT4/TSPOAP1	9
GO:0060840	GO:0060840	artery development	14/793	100/18670	8.25169e-05	0.00305851	0.00239305	ADAMTS9/CHD7/COL3A1/EFNB2/EYA1/LOX/LOXL1/MDK/NOG/NRP1/PDE2A/SOX4/TGFB2/VEGFA	14
GO:0071346	GO:0071346	cellular response to interferon-gamma	20/793	180/18670	8.34677e-05	0.00307149	0.00240321	AQP4/CASP1/CCL2/CCL20/CD44/CD58/GBP1/GBP2/GBP3/HLA-DQB1/HLA-DRA/IFI30/NMI/OAS1/PARP9/STXBP1/TLR2/TRIM22/VCAM1/VIM	20
GO:0051216	GO:0051216	cartilage development	22/793	209/18670	8.49726e-05	0.00310453	0.00242907	ANXA2/BMP2/CCN1/CD44/CHI3L1/COL1A1/COL6A2/COL6A3/EFEMP1/FGF9/HOXA5/LUM/MDK/MGP/NFIB/NOG/SCIN/SERPINH1/SOX6/TGFBI/TIMP1/ZEB1	22
GO:0002886	GO:0002886	regulation of myeloid leukocyte mediated immunity	10/793	55/18670	9.30877e-05	0.0033769	0.00264217	BCR/C3/FCER1G/FCGR2B/HMOX1/IL13RA2/ITGAM/ITGB2/STXBP1/VAMP8	10
GO:0072073	GO:0072073	kidney epithelium development	17/793	140/18670	9.37969e-05	0.00337867	0.00264356	BASP1/BMP2/DLL1/EFNB2/EYA1/IQGAP1/IRX2/LAMB2/LIF/NOG/NPNT/SDC4/SOX8/SPRY1/VEGFA/WWTR1/YAP1	17
GO:0150063	GO:0150063	visual system development	32/793	366/18670	9.5883e-05	0.00339331	0.00265501	C3/CHD7/COL4A1/COL5A1/COL5A2/CRB1/DCX/DLL1/DSCAM/EFEMP1/EPHB1/FGF9/ITGAM/LAMB2/MEGF11/NEUROD1/NR2E1/NRP1/RDH10/RHOJ/SERPINF1/SMOC1/SOX11/SOX8/TCIRG1/TGFB2/TWIST1/TWSG1/VAX2/VEGFA/VIM/ZEB1	32
GO:0015800	GO:0015800	acidic amino acid transport	11/793	66/18670	9.60328e-05	0.00339331	0.00265501	ABAT/CPLX1/P2RX7/PPFIA2/SLC1A1/SLC6A1/SNAP25/STXBP1/SYT1/SYT4/TSPOAP1	11
GO:0035987	GO:0035987	endodermal cell differentiation	9/793	45/18670	9.61937e-05	0.00339331	0.00265501	COL4A2/COL5A1/COL5A2/DKK1/FN1/ITGA7/ITGB2/ITGB5/LAMB1	9
GO:0071219	GO:0071219	cellular response to molecule of bacterial origin	22/793	212/18670	0.000104901	0.00365529	0.00285999	ADAM9/BCR/CARD16/CASP1/CCL2/CD14/CEBPB/CXCL10/CXCL8/FCGR2B/HAMP/LITAF/LTF/LY96/PYCARD/SERPINE1/TLR1/TLR2/TREM2/TSPO/VIM/ZFP36	22
GO:0050770	GO:0050770	regulation of axonogenesis	20/793	183/18670	0.000105049	0.00365529	0.00285999	CDK5R1/DSCAM/FGF13/FN1/LINGO1/LRP4/LRRC4C/MAP2/MAPT/MT3/NRP1/OLFM1/OMG/PAK3/SIPA1L1/SLITRK1/SPP1/TNFRSF12A/UST/VEGFA	20
GO:0007596	GO:0007596	blood coagulation	30/793	336/18670	0.00010813	0.00373705	0.00292396	ABAT/ANXA2/ANXA5/CAV1/CLIC1/COL1A1/COL1A2/COL3A1/CSRP1/DGKI/F13A1/F3/FCER1G/FLNA/FZD6/LCP2/MYL9/P2RX7/PDPN/PIK3R1/PLAT/PLAU/PLAUR/PLSCR1/PROS1/SERPINA1/SERPINE1/SERPING1/STXBP1/ZFPM2	30
GO:0048545	GO:0048545	response to steroid hormone	33/793	385/18670	0.000109558	0.00374054	0.00292669	ADAM9/ADM/AKR1C3/ANXA1/AQP1/ATP1A3/CA2/CAV1/CCND1/CNGA3/COL1A1/ERRFI1/FBXO32/FHL2/FIBIN/GJB2/IGFBP2/LOX/MAOB/MDK/MGARP/MSTN/NKX2-2/NR2E1/OXTR/SERPINF1/SIRT1/SPP1/TGFB2/TLR2/TSPO/YAP1/ZFP36	33
GO:0031099	GO:0031099	regeneration	21/793	198/18670	0.000109693	0.00374054	0.00292669	ADM/ANXA1/C5AR1/CCND1/CEBPB/CPQ/FZD7/HAMP/HMOX1/LAMB2/MDK/MSTN/NNMT/OMG/POSTN/PTGFRN/RGN/SPP1/TNC/TSPO/YAP1	21
GO:0072006	GO:0072006	nephron development	17/793	142/18670	0.000111958	0.0037925	0.00296735	ACTA2/ANGPT1/BASP1/BMP2/DLL1/EYA1/IQGAP1/IRX2/ITGA3/LAMB2/LIF/NOG/NPNT/SOX8/VEGFA/WWTR1/YAP1	17
GO:0048259	GO:0048259	regulation of receptor-mediated endocytosis	14/793	103/18670	0.000114266	0.00384522	0.00300859	ANGPT1/ANXA2/APOC2/C3/DKK1/EFNB2/LRRTM1/LRRTM2/SERPINE1/SFRP4/SH3GL2/SH3GL3/SNAP91/VEGFA	14
GO:0043300	GO:0043300	regulation of leukocyte degranulation	9/793	46/18670	0.000115134	0.0038491	0.00301163	BCR/FCER1G/FCGR2B/HMOX1/IL13RA2/ITGAM/ITGB2/STXBP1/VAMP8	9
GO:0060562	GO:0060562	epithelial tube morphogenesis	29/793	322/18670	0.000120465	0.00400117	0.00313062	ADM/BMP2/COL4A1/CTHRC1/CXCL10/CXCR4/DLL1/EFNB2/EYA1/FZD6/HOXA5/IRX2/MDK/NOG/NPNT/NRP1/PRKX/RDH10/SDC4/SOX11/SOX4/SOX8/SPRY1/SPRY2/TGFB2/TNC/TWIST1/VEGFA/YAP1	29
GO:0048880	GO:0048880	sensory system development	32/793	371/18670	0.000123403	0.00407231	0.00318628	C3/CHD7/COL4A1/COL5A1/COL5A2/CRB1/DCX/DLL1/DSCAM/EFEMP1/EPHB1/FGF9/ITGAM/LAMB2/MEGF11/NEUROD1/NR2E1/NRP1/RDH10/RHOJ/SERPINF1/SMOC1/SOX11/SOX8/TCIRG1/TGFB2/TWIST1/TWSG1/VAX2/VEGFA/VIM/ZEB1	32
GO:0070374	GO:0070374	positive regulation of ERK1 and ERK2 cascade	22/793	215/18670	0.000128877	0.00422567	0.00330627	AKAP12/ANGPT1/BMP2/C5AR1/CCL2/CCL20/CCR1/CD44/CD74/CHI3L1/GPNMB/GPR183/MT3/NPNT/NRP1/PLA2G2A/PLA2G5/PRKCZ/PYCARD/SHC1/SPRY2/TREM2	22
GO:0007411	GO:0007411	axon guidance	26/793	276/18670	0.000129832	0.00422987	0.00330956	ALCAM/CDK5R1/CELSR3/CHL1/CRMP1/CXCR4/CYFIP2/DOK6/DSCAM/EFNB2/EPHB1/GRB10/LAMA2/LAMB2/MYOT/NFIB/NOG/NRP1/NRXN1/NTN4/PIK3R1/RNF165/RPS6KA5/SHC1/UNC5A/VEGFA	26
GO:0042730	GO:0042730	fibrinolysis	7/793	28/18670	0.000131473	0.00424146	0.00331862	ANXA2/PLAT/PLAU/PLAUR/PROS1/SERPINE1/SERPING1	7
GO:0070831	GO:0070831	basement membrane assembly	5/793	13/18670	0.000132124	0.00424146	0.00331862	CLASP2/LAMB1/LAMB2/NTN4/PLOD3	5
GO:0019932	GO:0019932	second-messenger-mediated signaling	36/793	439/18670	0.000132675	0.00424146	0.00331862	ADGRB3/ADGRE5/ADGRL2/ADM/AQP1/CAMTA1/CCL20/CCR1/CDH13/CHGA/CXCL10/CXCL8/CXCR4/FHL2/FPR1/GBP1/GNAI1/GNAL/GPR65/HRH1/JPH3/JPH4/LPAR1/MAPT/NEUROD1/P2RX7/PDE2A/RAPGEF4/RCAN1/RGN/RIMS2/RUNDC3A/TMEM100/TREM2/VCAM1/VEGFA	36
GO:0031952	GO:0031952	regulation of protein autophosphorylation	9/793	47/18670	0.000137097	0.0043556	0.00340794	CAV1/ERRFI1/GPNMB/IMPACT/IQGAP1/MVP/RAP2A/TOM1L1/VEGFA	9
GO:0007599	GO:0007599	hemostasis	30/793	341/18670	0.000140565	0.00443821	0.00347257	ABAT/ANXA2/ANXA5/CAV1/CLIC1/COL1A1/COL1A2/COL3A1/CSRP1/DGKI/F13A1/F3/FCER1G/FLNA/FZD6/LCP2/MYL9/P2RX7/PDPN/PIK3R1/PLAT/PLAU/PLAUR/PLSCR1/PROS1/SERPINA1/SERPINE1/SERPING1/STXBP1/ZFPM2	30
GO:0007612	GO:0007612	learning	17/793	145/18670	0.000144978	0.00450744	0.00352673	ADGRB3/ASIC1/C1QL1/DGKI/DKK1/FGF13/HRH1/JPH3/JPH4/NRXN1/NRXN2/PAK5/SHANK2/SLC6A1/SNAP25/TAFA2/TLR2	17
GO:0060485	GO:0060485	mesenchyme development	26/793	278/18670	0.000145896	0.00450744	0.00352673	ACTA2/BASP1/BMP2/CLASP2/COL1A1/DLL3/FGF9/FN1/HOXA5/MDK/NOG/NRP1/OLFM1/PDPN/RDH10/S100A4/SOX11/SOX8/SPRY1/TGFB2/TMEM100/TWIST1/VASN/WWTR1/YAP1/ZFPM2	26
GO:0017157	GO:0017157	regulation of exocytosis	22/793	217/18670	0.000147445	0.00450744	0.00352673	ANXA1/BCR/CLASP2/CPLX1/DGKI/FCER1G/FCGR2B/HMOX1/IL13RA2/ITGAM/ITGB2/KCNB1/PPFIA2/RAB3C/RAPGEF4/RIMS2/SCAMP5/SDC4/STXBP1/SYT1/SYT4/VAMP8	22
GO:0050920	GO:0050920	regulation of chemotaxis	22/793	217/18670	0.000147445	0.00450744	0.00352673	C5AR1/CCL2/CCR1/CD74/CDH13/CXCL10/CXCL14/CXCL8/CXCR4/DSCAM/EFNB2/F3/GPR183/LPAR1/MDK/MSTN/NRP1/RARRES2/SERPINE1/SWAP70/TREM2/VEGFA	22
GO:0050817	GO:0050817	coagulation	30/793	342/18670	0.000148012	0.00450744	0.00352673	ABAT/ANXA2/ANXA5/CAV1/CLIC1/COL1A1/COL1A2/COL3A1/CSRP1/DGKI/F13A1/F3/FCER1G/FLNA/FZD6/LCP2/MYL9/P2RX7/PDPN/PIK3R1/PLAT/PLAU/PLAUR/PLSCR1/PROS1/SERPINA1/SERPINE1/SERPING1/STXBP1/ZFPM2	30
GO:0035904	GO:0035904	aorta development	10/793	58/18670	0.000148045	0.00450744	0.00352673	ADAMTS9/CHD7/COL3A1/EFNB2/EYA1/LOX/LOXL1/PDE2A/SOX4/TGFB2	10
GO:0032680	GO:0032680	regulation of tumor necrosis factor production	18/793	160/18670	0.000158881	0.00480875	0.00376249	AKAP12/ANGPT1/CD14/ERRFI1/FCER1G/GPNMB/IFIH1/LTF/LY96/PIK3R1/PYCARD/TLR1/TLR2/TREM2/TSPO/TWIST1/TYROBP/ZFP36	18
GO:0008038	GO:0008038	neuron recognition	9/793	48/18670	0.000162451	0.00488787	0.00382439	CDK5R1/CELSR3/CRTAC1/CXCR4/DSCAM/NDN/NRP1/NTM/OPCML	9
GO:0034612	GO:0034612	response to tumor necrosis factor	28/793	312/18670	0.00016638	0.00494406	0.00386836	ADAM9/AKAP12/BIRC3/CARD16/CASP1/CASP4/CCL2/CCL20/CD14/CD58/CHI3L1/COL1A1/CXCL8/GBP1/GBP2/GBP3/HAMP/NPNT/PID1/POSTN/PYCARD/SIRT1/SPPL2A/TNFRSF11B/TNFRSF12A/TNFRSF1A/VCAM1/ZFP36	28
GO:0072606	GO:0072606	interleukin-8 secretion	7/793	29/18670	0.000166999	0.00494406	0.00386836	ANXA1/CD14/CD58/CHI3L1/PYCARD/TLR1/TLR2	7
GO:0002573	GO:0002573	myeloid leukocyte differentiation	21/793	204/18670	0.000167218	0.00494406	0.00386836	ANXA2/C1QC/CA2/CCR1/CD74/CEBPB/FCER1G/GPR183/HCLS1/LIF/LTF/MT1G/PIK3R1/PIR/SIRT1/SNX10/TCIRG1/TLR2/TREM2/TYROBP/VEGFA	21
GO:0042116	GO:0042116	macrophage activation	13/793	95/18670	0.000185453	0.0054119	0.00423441	C5AR1/CD200/CD74/CTSC/FCGR2B/ITGAM/ITGB2/MAPT/TLR1/TLR2/TREM2/TYROBP/VSIG4	13
GO:0031960	GO:0031960	response to corticosteroid	18/793	162/18670	0.000185935	0.0054119	0.00423441	ADAM9/ADM/AKR1C3/ANXA1/AQP1/CCND1/CNGA3/COL1A1/ERRFI1/FBXO32/FIBIN/GJB2/IGFBP2/MAOB/MDK/MSTN/SERPINF1/ZFP36	18
GO:0061041	GO:0061041	regulation of wound healing	17/793	148/18670	0.000186216	0.0054119	0.00423441	ABAT/ANXA1/ANXA2/ANXA5/CAV1/CLASP2/CXCR4/F3/FCER1G/PDPN/PLAT/PLAU/PLAUR/PROS1/SERPINE1/SERPING1/TNFRSF12A	17
GO:0001704	GO:0001704	formation of primary germ layer	15/793	121/18670	0.000189001	0.00546181	0.00427346	ATOH8/COL4A2/COL5A1/COL5A2/DKK1/EYA1/FN1/FZD7/ITGA3/ITGA7/ITGB2/ITGB5/LAMB1/NOG/TWSG1	15
GO:0050679	GO:0050679	positive regulation of epithelial cell proliferation	21/793	206/18670	0.000191586	0.00547491	0.0042837	ANG/BMP2/C5AR1/CAV2/CCND1/CDH13/EYA1/F3/FGF9/FZD7/HMOX1/LAMB1/LAMC1/MDK/NOG/NRP1/RICTOR/SIRT1/SOX11/TWIST1/VEGFA	21
GO:0008347	GO:0008347	glial cell migration	9/793	49/18670	0.000191595	0.00547491	0.0042837	CCL2/CDK5R1/GPR183/LAMB1/NDN/NR2E1/TGFB2/TREM2/TSPO	9
GO:0045576	GO:0045576	mast cell activation	10/793	60/18670	0.000198154	0.00558517	0.00436998	CHGA/FCER1G/HMOX1/IL13RA2/LCP2/NDRG1/PLSCR1/S100A13/STXBP1/VAMP8	10
GO:0021781	GO:0021781	glial cell fate commitment	5/793	14/18670	0.000198355	0.00558517	0.00436998	ASCL1/NKX2-2/OLIG2/SOX6/SOX8	5
GO:0031214	GO:0031214	biomineral tissue development	18/793	163/18670	0.000200913	0.00558517	0.00436998	ANXA2/ASPN/BMP2/CCN1/CCR1/CEBPB/COL1A1/COL1A2/GPNMB/IBSP/LOX/LTF/MGP/P2RX7/SNX10/SPP1/TCIRG1/TWIST1	18
GO:0032640	GO:0032640	tumor necrosis factor production	18/793	163/18670	0.000200913	0.00558517	0.00436998	AKAP12/ANGPT1/CD14/ERRFI1/FCER1G/GPNMB/IFIH1/LTF/LY96/PIK3R1/PYCARD/TLR1/TLR2/TREM2/TSPO/TWIST1/TYROBP/ZFP36	18
GO:1903555	GO:1903555	regulation of tumor necrosis factor superfamily cytokine production	18/793	163/18670	0.000200913	0.00558517	0.00436998	AKAP12/ANGPT1/CD14/ERRFI1/FCER1G/GPNMB/IFIH1/LTF/LY96/PIK3R1/PYCARD/TLR1/TLR2/TREM2/TSPO/TWIST1/TYROBP/ZFP36	18
GO:0048839	GO:0048839	inner ear development	20/793	192/18670	0.000202234	0.00559148	0.00437492	BCR/BMP2/C1QB/CEBPD/CHD7/CHRNA9/CTHRC1/CXCL14/DLL1/EYA1/FGF9/FZD6/GABRB3/GJB2/KCNK3/NEUROD1/SDC4/SPRY2/TGFB2/ZEB1	20
GO:0072009	GO:0072009	nephron epithelium development	14/793	109/18670	0.000210573	0.00579075	0.00453083	BASP1/BMP2/DLL1/EYA1/IQGAP1/IRX2/LAMB2/LIF/NOG/NPNT/SOX8/VEGFA/WWTR1/YAP1	14
GO:1903034	GO:1903034	regulation of response to wounding	19/793	179/18670	0.000226859	0.00620166	0.00485233	ABAT/ANXA1/ANXA2/ANXA5/CAV1/CLASP2/CXCR4/F3/FCER1G/MDK/PDPN/PLAT/PLAU/PLAUR/PROS1/SERPINE1/SERPING1/SPP1/TNFRSF12A	19
GO:0003170	GO:0003170	heart valve development	10/793	61/18670	0.000228117	0.00620166	0.00485233	ADAMTS9/BMP2/CCN1/EMILIN1/OLFM1/PDE2A/SOX4/TGFB2/TNFRSF1A/TWIST1	10
GO:0048709	GO:0048709	oligodendrocyte differentiation	13/793	97/18670	0.000229152	0.00620166	0.00485233	ASCL1/CXCR4/GPR17/LPAR1/MDK/NKX2-2/OLIG2/PLP1/SOX11/SOX6/SOX8/TLR2/ZNF488	13
GO:1902903	GO:1902903	regulation of supramolecular fiber organization	30/793	352/18670	0.000244329	0.00657759	0.00514647	AEBP1/ARHGAP18/ARPC1B/CAPG/CDK5R1/CLASP2/EMILIN1/FCHSD2/FGF13/FLNA/GPR65/HCLS1/LPAR1/MAP2/MAPT/NRP1/PAK3/PIK3R1/PPM1E/PSRC1/PYCARD/RICTOR/S100A10/SCIN/SDC4/STMN2/SWAP70/TMEFF2/TMSB15A/WASF1	30
GO:0014013	GO:0014013	regulation of gliogenesis	15/793	124/18670	0.000248221	0.00664738	0.00520108	BMP2/CXCR4/GPR183/LIF/MDK/NKX2-2/NOG/NR2E1/OLIG2/SOX11/SOX8/TLR2/TREM2/TSPO/ZNF488	15
GO:0043523	GO:0043523	regulation of neuron apoptotic process	21/793	210/18670	0.00024987	0.00665668	0.00520835	ANGPT1/ASCL1/C5AR1/CCL2/CDK5R1/CEBPB/CHL1/GABRB3/HMOX1/ITGAM/KCNB1/MDK/MT3/NRP1/NUPR1/PAK3/SOD2/STXBP1/TGFB2/TOX3/TYROBP	21
GO:0044319	GO:0044319	wound healing, spreading of cells	7/793	31/18670	0.000261275	0.00683185	0.00534541	CCN1/CD44/CLASP2/COL5A1/FLNA/PDPN/TMEFF2	7
GO:0090505	GO:0090505	epiboly involved in wound healing	7/793	31/18670	0.000261275	0.00683185	0.00534541	CCN1/CD44/CLASP2/COL5A1/FLNA/PDPN/TMEFF2	7
GO:0048857	GO:0048857	neural nucleus development	10/793	62/18670	0.000261787	0.00683185	0.00534541	ASCL1/BASP1/CDK5R1/FGF9/INA/MAOB/NDRG2/NFIB/PLP1/SYNGR3	10
GO:1901862	GO:1901862	negative regulation of muscle tissue development	10/793	62/18670	0.000261787	0.00683185	0.00534541	BMP2/DKK1/DLL1/EPHB1/FZD7/IGFBP5/MSTN/NOG/SOX6/TWIST1	10
GO:0014015	GO:0014015	positive regulation of gliogenesis	11/793	74/18670	0.000274601	0.00712987	0.00557859	BMP2/CXCR4/LIF/MDK/NKX2-2/OLIG2/SOX8/TLR2/TREM2/TSPO/ZNF488	11
GO:0050715	GO:0050715	positive regulation of cytokine secretion	16/793	139/18670	0.000278162	0.00718586	0.0056224	AKAP12/CASP1/CD14/CD58/CLEC5A/FERMT1/IFIH1/MDK/P2RX7/POSTN/PRKCZ/PYCARD/SCAMP5/TLR1/TLR2/TWIST1	16
GO:0010273	GO:0010273	detoxification of copper ion	5/793	15/18670	0.000287161	0.00727143	0.00568935	MT1E/MT1F/MT1G/MT1M/MT3	5
GO:0072148	GO:0072148	epithelial cell fate commitment	5/793	15/18670	0.000287161	0.00727143	0.00568935	DLL1/NEUROD1/NKX2-2/NRP1/PDPN	5
GO:1990169	GO:1990169	stress response to copper ion	5/793	15/18670	0.000287161	0.00727143	0.00568935	MT1E/MT1F/MT1G/MT1M/MT3	5
GO:2000484	GO:2000484	positive regulation of interleukin-8 secretion	5/793	15/18670	0.000287161	0.00727143	0.00568935	CD14/CD58/PYCARD/TLR1/TLR2	5
GO:0050806	GO:0050806	positive regulation of synaptic transmission	18/793	168/18670	0.000292712	0.00733931	0.00574246	ABAT/CA2/CACNG2/CCL2/CUX2/LAMA2/LRRTM1/LRRTM2/NR2E1/NRXN1/OXTR/PRKCZ/RIMS2/SHANK2/SNAP25/STXBP1/SYT1/TYROBP	18
GO:0071706	GO:0071706	tumor necrosis factor superfamily cytokine production	18/793	168/18670	0.000292712	0.00733931	0.00574246	AKAP12/ANGPT1/CD14/ERRFI1/FCER1G/GPNMB/IFIH1/LTF/LY96/PIK3R1/PYCARD/TLR1/TLR2/TREM2/TSPO/TWIST1/TYROBP/ZFP36	18
GO:0045667	GO:0045667	regulation of osteoblast differentiation	15/793	126/18670	0.000296053	0.00738689	0.00577969	BMP2/CCN1/CEBPB/CEBPD/CLIC1/CTHRC1/IGFBP5/LTF/NOG/NPNT/SMOC1/SOX11/TCIRG1/TWIST1/TWSG1	15
GO:0071356	GO:0071356	cellular response to tumor necrosis factor	26/793	291/18670	0.000300777	0.00742539	0.00580982	AKAP12/BIRC3/CARD16/CASP1/CASP4/CCL2/CCL20/CD58/CHI3L1/COL1A1/CXCL8/GBP1/GBP2/GBP3/HAMP/NPNT/PID1/POSTN/PYCARD/SIRT1/SPPL2A/TNFRSF11B/TNFRSF12A/TNFRSF1A/VCAM1/ZFP36	26
GO:0002690	GO:0002690	positive regulation of leukocyte chemotaxis	12/793	87/18670	0.000301262	0.00742539	0.00580982	C5AR1/CCR1/CD74/CXCL10/CXCL14/CXCL8/MDK/MSTN/RARRES2/SERPINE1/SWAP70/VEGFA	12
GO:0060078	GO:0060078	regulation of postsynaptic membrane potential	16/793	140/18670	0.000301952	0.00742539	0.00580982	ABAT/CHRNA9/CUX2/DGKI/FGF14/GABBR1/GABRA3/GABRB3/GABRG2/GRIA3/KCND2/NRXN1/P2RX7/PRKCZ/RIMS2/SHANK2	16
GO:0150076	GO:0150076	neuroinflammatory response	11/793	75/18670	0.000309657	0.00757617	0.00592779	BACE2/C5AR1/CD200/CTSC/ITGAM/ITGB2/MAPT/NUPR1/TLR2/TREM2/TYROBP	11
GO:0034446	GO:0034446	substrate adhesion-dependent cell spreading	13/793	100/18670	0.000311094	0.00757617	0.00592779	FLNA/FN1/FZD7/GBP1/LAMB1/LAMB2/LAMC1/MDK/NRP1/NTN4/PDPN/POSTN/S100A10	13
GO:0048714	GO:0048714	positive regulation of oligodendrocyte differentiation	6/793	23/18670	0.000312526	0.00757617	0.00592779	CXCR4/MDK/NKX2-2/OLIG2/TLR2/ZNF488	6
GO:0060317	GO:0060317	cardiac epithelial to mesenchymal transition	7/793	32/18670	0.000322289	0.00773946	0.00605555	BMP2/NOG/OLFM1/SPRY1/TGFB2/TMEM100/TWIST1	7
GO:0090504	GO:0090504	epiboly	7/793	32/18670	0.000322289	0.00773946	0.00605555	CCN1/CD44/CLASP2/COL5A1/FLNA/PDPN/TMEFF2	7
GO:0097530	GO:0097530	granulocyte migration	16/793	141/18670	0.000327478	0.00782734	0.00612431	ANXA1/C5AR1/CCL2/CCL20/CD74/CXCL10/CXCL8/FCER1G/HRH1/ITGB2/MDK/MSTN/RARRES2/S100A8/S100A9/TGFB2	16
GO:1904035	GO:1904035	regulation of epithelial cell apoptotic process	12/793	88/18670	0.000335598	0.0079841	0.00624696	AKR1C3/ANGPT1/ANGPTL4/CAST/CCL2/HMOX1/MDK/NEUROD1/NUPR1/SERPINE1/SFRP4/ZFP36	12
GO:0007492	GO:0007492	endoderm development	11/793	76/18670	0.000348404	0.00821238	0.00642558	COL4A2/COL5A1/COL5A2/DKK1/FN1/ITGA7/ITGB2/ITGB5/LAMB1/LAMC1/NOG	11
GO:0048844	GO:0048844	artery morphogenesis	11/793	76/18670	0.000348404	0.00821238	0.00642558	ADAMTS9/CHD7/COL3A1/EFNB2/EYA1/MDK/NOG/NRP1/SOX4/TGFB2/VEGFA	11
GO:0002687	GO:0002687	positive regulation of leukocyte migration	15/793	128/18670	0.000351616	0.00821694	0.00642914	C5AR1/CCL20/CCR1/CD74/CXCL10/CXCL14/CXCL8/MDK/MSTN/PYCARD/RARRES2/SERPINE1/SWAP70/TREM2/VEGFA	15
GO:0015850	GO:0015850	organic hydroxy compound transport	24/793	262/18670	0.00035181	0.00821694	0.00642914	ABAT/ABCA5/ABCC3/AKR1C1/ANXA2/APOC2/AQP1/CAV1/CHGA/FCER1G/KCNB1/LIPG/MAOB/NPC2/OSBPL3/OXTR/PLTP/SIRT1/SLC16A3/SOAT1/SPP1/SYT1/SYT4/TSPO	24
GO:0030195	GO:0030195	negative regulation of blood coagulation	9/793	53/18670	0.000355163	0.00822018	0.00643167	ABAT/ANXA2/ANXA5/PLAT/PLAU/PLAUR/PROS1/SERPINE1/SERPING1	9
GO:1903307	GO:1903307	positive regulation of regulated secretory pathway	9/793	53/18670	0.000355163	0.00822018	0.00643167	FCER1G/ITGAM/ITGB2/KCNB1/SCAMP5/STXBP1/SYT1/SYT4/VAMP8	9
GO:0001764	GO:0001764	neuron migration	17/793	157/18670	0.000377114	0.00867828	0.00679011	ASCL1/CDK5R1/CELSR3/CHL1/COL3A1/CXCR4/DCX/DNER/FGF13/FLNA/ITGA3/MDK/NDN/NRP1/SPOCK1/TWIST1/VEGFA	17
GO:0016485	GO:0016485	protein processing	28/793	328/18670	0.000378349	0.00867828	0.00679011	AEBP1/ANXA2/BACE2/BIRC3/C1QB/C1QC/C1R/C1S/C3/C5AR1/CARD16/CASP1/CAST/CFB/CFI/CYFIP2/F3/P2RX7/PCSK2/PCSK5/PLAT/PLAU/PROS1/PYCARD/SERPINE1/SERPING1/SUSD4/VSIG4	28
GO:0048813	GO:0048813	dendrite morphogenesis	16/793	143/18670	0.000384162	0.00877228	0.00686365	ADGRB3/CDK5R1/CUX2/DNM3/DSCAM/EPHB1/LRP4/MAP2/NR2E1/NRP1/PAK3/RAP2A/SDC2/SHANK2/SIPA1L1/SLITRK5	16
GO:0001654	GO:0001654	eye development	30/793	362/18670	0.000392918	0.00887392	0.00694318	CHD7/COL4A1/COL5A1/COL5A2/CRB1/DCX/DLL1/DSCAM/EFEMP1/EPHB1/FGF9/LAMB2/MEGF11/NEUROD1/NR2E1/NRP1/RDH10/RHOJ/SERPINF1/SMOC1/SOX11/SOX8/TCIRG1/TGFB2/TWIST1/TWSG1/VAX2/VEGFA/VIM/ZEB1	30
GO:0006692	GO:0006692	prostanoid metabolic process	8/793	43/18670	0.000395553	0.00887392	0.00694318	AKR1C3/ANXA1/CBR1/CD74/PTGR1/PTGS1/SIRT1/TNFRSF1A	8
GO:0006693	GO:0006693	prostaglandin metabolic process	8/793	43/18670	0.000395553	0.00887392	0.00694318	AKR1C3/ANXA1/CBR1/CD74/PTGR1/PTGS1/SIRT1/TNFRSF1A	8
GO:0045687	GO:0045687	positive regulation of glial cell differentiation	8/793	43/18670	0.000395553	0.00887392	0.00694318	BMP2/CXCR4/LIF/MDK/NKX2-2/OLIG2/TLR2/ZNF488	8
GO:0003181	GO:0003181	atrioventricular valve morphogenesis	6/793	24/18670	0.000401841	0.00897561	0.00702275	BMP2/CCN1/OLFM1/SOX4/TGFB2/TWIST1	6
GO:0021987	GO:0021987	cerebral cortex development	14/793	116/18670	0.000404565	0.00899716	0.00703961	ASCL1/BCL2A1/CDK5R1/COL3A1/DMRTA2/FGF13/FLNA/GNG12/LAMB1/MDK/NR2E1/NRP1/PLCB1/TACC2	14
GO:0070206	GO:0070206	protein trimerization	9/793	54/18670	0.000410368	0.00904755	0.00707904	ALOX5AP/ASIC1/CD74/COL1A1/COL1A2/COL6A2/EMILIN1/MGST1/TRIM22	9
GO:1900047	GO:1900047	negative regulation of hemostasis	9/793	54/18670	0.000410368	0.00904755	0.00707904	ABAT/ANXA2/ANXA5/PLAT/PLAU/PLAUR/PROS1/SERPINE1/SERPING1	9
GO:1903035	GO:1903035	negative regulation of response to wounding	12/793	90/18670	0.000414278	0.0090833	0.007107	ABAT/ANXA2/ANXA5/CLASP2/MDK/PLAT/PLAU/PLAUR/PROS1/SERPINE1/SERPING1/SPP1	12
GO:0060041	GO:0060041	retina development in camera-type eye	16/793	144/18670	0.000415541	0.0090833	0.007107	CHD7/COL4A1/DCX/DLL1/DSCAM/LAMB2/MEGF11/NEUROD1/NR2E1/NRP1/RHOJ/SERPINF1/SOX8/TCIRG1/TGFB2/VAX2	16
GO:0007584	GO:0007584	response to nutrient	21/793	219/18670	0.000440777	0.00959394	0.00750654	AKR1C3/ASCL1/CASTOR3/CCND1/COL1A1/CXCL10/GDAP1/HAMP/HMOX1/IGFBP2/LDHA/LIPG/NMRAL1/P2RX7/POSTN/RYR3/SPP1/TNC/TNFRSF11B/TSPO/VCAM1	21
GO:0030099	GO:0030099	myeloid cell differentiation	33/793	416/18670	0.000451554	0.00974794	0.00762703	ACTN1/ANXA2/C1QC/CA2/CCR1/CD74/CEBPB/CLEC5A/DLL1/FCER1G/GPR183/H4C3/HCLS1/HOXA5/ITPKB/LIF/LOX/LTF/MT1G/MYL9/PIK3R1/PIR/PRKX/SCIN/SIRT1/SNX10/SOX6/TCIRG1/TLR2/TREM2/TYROBP/VEGFA/ZFP36	33
GO:0055076	GO:0055076	transition metal ion homeostasis	15/793	131/18670	0.000451664	0.00974794	0.00762703	CP/CYBRD1/HAMP/HEPH/HMOX1/LTF/MT1E/MT1F/MT1G/MT1M/MT3/S100A8/S100A9/STEAP1/STEAP3	15
GO:0014909	GO:0014909	smooth muscle cell migration	12/793	91/18670	0.000459121	0.00986725	0.00772038	ADAMTS1/FGF9/IGFBP3/IGFBP5/IQGAP1/LPAR1/MDK/NRP1/PLAT/PLAU/POSTN/SERPINE1	12
GO:0035850	GO:0035850	epithelial cell differentiation involved in kidney development	8/793	44/18670	0.00046569	0.00996655	0.00779808	ACTA2/BASP1/IQGAP1/LAMB2/LIF/PRKX/WWTR1/YAP1	8

## Sheet: GSE results for high-risk group
NAME	GS<br> follow link to MSigDB	GS DETAILS	SIZE	ES	NES	NOM p-val	FDR q-val	FWER p-val	RANK AT MAX	LEADING EDGE
GO_AMINO_ACID_BETAINE_METABOLIC_PROCESS	GO_AMINO_ACID_BETAINE_METABOLIC_PROCESS		17	0.674551	1.51414	0.0353635	0.190291	1	3076	tags=53%, list=18%, signal=64%
GO_DETECTION_OF_BIOTIC_STIMULUS	GO_DETECTION_OF_BIOTIC_STIMULUS		23	0.719207	1.51308	0.0358491	0.190366	1	3873	tags=65%, list=23%, signal=84%
GO_REGULATION_OF_CYTOKINE_SECRETION	GO_REGULATION_OF_CYTOKINE_SECRETION		135	0.589585	1.5134	0.0285714	0.190413	1	3988	tags=50%, list=23%, signal=65%
GO_REGULATION_OF_B_CELL_MEDIATED_IMMUNITY	GO_REGULATION_OF_B_CELL_MEDIATED_IMMUNITY		38	0.533356	1.51432	0.0444015	0.190556	1	2707	tags=32%, list=16%, signal=37%
GO_MYOBLAST_FUSION	GO_MYOBLAST_FUSION		18	0.565115	1.51446	0.0399202	0.190837	1	925	tags=17%, list=5%, signal=18%
GO_REGULATION_OF_HEMOPOIESIS	GO_REGULATION_OF_HEMOPOIESIS		281	0.482059	1.51341	0.0172745	0.190942	1	3068	tags=33%, list=18%, signal=40%
GO_CELL_DIFFERENTIATION_INVOLVED_IN_EMBRYONIC_PLACENTA_DEVELOPMENT	GO_CELL_DIFFERENTIATION_INVOLVED_IN_EMBRYONIC_PLACENTA_DEVELOPMENT		24	0.672951	1.5147	0.0191571	0.190963	1	3662	tags=54%, list=21%, signal=69%
GO_NAD_METABOLIC_PROCESS	GO_NAD_METABOLIC_PROCESS		47	0.534331	1.51526	0.0428571	0.191077	1	2723	tags=40%, list=16%, signal=48%
GO_CELLULAR_RESPONSE_TO_ALKALOID	GO_CELLULAR_RESPONSE_TO_ALKALOID		31	0.570784	1.51494	0.0141414	0.191105	1	2516	tags=35%, list=15%, signal=41%
GO_REGULATION_OF_SYSTEMIC_ARTERIAL_BLOOD_PRESSURE_BY_RENIN_ANGIOTENSIN	GO_REGULATION_OF_SYSTEMIC_ARTERIAL_BLOOD_PRESSURE_BY_RENIN_ANGIOTENSIN		22	0.635215	1.51533	0.0380952	0.191511	1	1703	tags=23%, list=10%, signal=25%
GO_REGULATION_OF_B_CELL_PROLIFERATION	GO_REGULATION_OF_B_CELL_PROLIFERATION		54	0.618781	1.51561	0.0555556	0.191646	1	2900	tags=39%, list=17%, signal=47%
GO_REGULATION_OF_SYSTEMIC_ARTERIAL_BLOOD_PRESSURE_BY_HORMONE	GO_REGULATION_OF_SYSTEMIC_ARTERIAL_BLOOD_PRESSURE_BY_HORMONE		35	0.553917	1.50993	0.0374753	0.191689	1	1703	tags=17%, list=10%, signal=19%
GO_NEURON_PROJECTION_REGENERATION	GO_NEURON_PROJECTION_REGENERATION		29	0.688448	1.5109	0.0221774	0.191747	1	1588	tags=34%, list=9%, signal=38%
GO_REGULATION_OF_INTERLEUKIN_2_BIOSYNTHETIC_PROCESS	GO_REGULATION_OF_INTERLEUKIN_2_BIOSYNTHETIC_PROCESS		18	0.62323	1.51574	0.0534653	0.192039	1	1828	tags=33%, list=11%, signal=37%
GO_POSITIVE_REGULATION_OF_RESPONSE_TO_EXTERNAL_STIMULUS	GO_POSITIVE_REGULATION_OF_RESPONSE_TO_EXTERNAL_STIMULUS		280	0.565349	1.51142	0.0273438	0.192055	1	3128	tags=37%, list=18%, signal=45%
GO_REGULATION_OF_TUMOR_NECROSIS_FACTOR_BIOSYNTHETIC_PROCESS	GO_REGULATION_OF_TUMOR_NECROSIS_FACTOR_BIOSYNTHETIC_PROCESS		17	0.73197	1.51173	0.0376984	0.192058	1	3756	tags=59%, list=22%, signal=75%
GO_REGULATION_OF_NIK_NF_KAPPAB_SIGNALING	GO_REGULATION_OF_NIK_NF_KAPPAB_SIGNALING		41	0.542397	1.51003	0.0339321	0.192087	1	3311	tags=34%, list=19%, signal=42%
GO_CELLULAR_IRON_ION_HOMEOSTASIS	GO_CELLULAR_IRON_ION_HOMEOSTASIS		40	0.571515	1.49699	0.0224033	0.192114	1	1346	tags=23%, list=8%, signal=24%
GO_NUCLEOSIDE_TRANSPORT	GO_NUCLEOSIDE_TRANSPORT		15	0.528016	1.51101	0.0287908	0.192123	1	1311	tags=13%, list=8%, signal=14%
GO_MODIFICATION_OF_MORPHOLOGY_OR_PHYSIOLOGY_OF_OTHER_ORGANISM	GO_MODIFICATION_OF_MORPHOLOGY_OR_PHYSIOLOGY_OF_OTHER_ORGANISM		92	0.463489	1.49641	0.0155039	0.192136	1	2848	tags=27%, list=17%, signal=32%
GO_POSITIVE_REGULATION_OF_CELL_ADHESION	GO_POSITIVE_REGULATION_OF_CELL_ADHESION		344	0.511721	1.4961	0.0251938	0.192225	1	3041	tags=37%, list=18%, signal=44%
GO_CYTOKINE_PRODUCTION	GO_CYTOKINE_PRODUCTION		114	0.56688	1.50027	0.0373134	0.192225	1	3095	tags=42%, list=18%, signal=51%
GO_SALIVARY_GLAND_DEVELOPMENT	GO_SALIVARY_GLAND_DEVELOPMENT		32	0.615643	1.49713	0.0192678	0.19236	1	3041	tags=53%, list=18%, signal=64%
GO_AGING	GO_AGING		254	0.503252	1.49805	0.00769231	0.19237	1	2866	tags=32%, list=17%, signal=38%
GO_POSITIVE_REGULATION_OF_WOUND_HEALING	GO_POSITIVE_REGULATION_OF_WOUND_HEALING		46	0.617737	1.4965	0.0403071	0.192461	1	1651	tags=28%, list=10%, signal=31%
GO_HOMEOSTASIS_OF_NUMBER_OF_CELLS	GO_HOMEOSTASIS_OF_NUMBER_OF_CELLS		162	0.42252	1.49556	0.0157791	0.192492	1	2744	tags=25%, list=16%, signal=29%
GO_LYMPHOCYTE_CHEMOTAXIS	GO_LYMPHOCYTE_CHEMOTAXIS		32	0.69627	1.51009	0.039604	0.19252	1	3934	tags=47%, list=23%, signal=61%
GO_EXTRACELLULAR_MATRIX_DISASSEMBLY	GO_EXTRACELLULAR_MATRIX_DISASSEMBLY		69	0.590599	1.49822	0.0338983	0.192537	1	2288	tags=38%, list=13%, signal=43%
GO_REGULATION_OF_VIRAL_GENOME_REPLICATION	GO_REGULATION_OF_VIRAL_GENOME_REPLICATION		66	0.634057	1.51577	0.0388889	0.192547	1	3257	tags=48%, list=19%, signal=60%
GO_TOLL_LIKE_RECEPTOR_SIGNALING_PATHWAY	GO_TOLL_LIKE_RECEPTOR_SIGNALING_PATHWAY		81	0.65662	1.49521	0.0500963	0.19256	1	2007	tags=43%, list=12%, signal=49%
GO_LIPID_OXIDATION	GO_LIPID_OXIDATION		69	0.441527	1.50034	0.0592885	0.192574	1	3891	tags=38%, list=23%, signal=49%
GO_PATTERN_RECOGNITION_RECEPTOR_SIGNALING_PATHWAY	GO_PATTERN_RECOGNITION_RECEPTOR_SIGNALING_PATHWAY		102	0.634392	1.49728	0.0423892	0.192577	1	2598	tags=43%, list=15%, signal=51%
GO_REGULATION_OF_LEUKOCYTE_MIGRATION	GO_REGULATION_OF_LEUKOCYTE_MIGRATION		139	0.642624	1.50906	0.0194553	0.192594	1	3092	tags=47%, list=18%, signal=57%
GO_REGULATION_OF_IMMUNE_EFFECTOR_PROCESS	GO_REGULATION_OF_IMMUNE_EFFECTOR_PROCESS		379	0.479385	1.50873	0.0249042	0.192634	1	3049	tags=31%, list=18%, signal=37%
GO_PROTEIN_MATURATION	GO_PROTEIN_MATURATION		246	0.434204	1.49752	0.00795229	0.192682	1	3486	tags=31%, list=20%, signal=39%
GO_PROTEIN_HETEROOLIGOMERIZATION	GO_PROTEIN_HETEROOLIGOMERIZATION		81	0.4679	1.50054	0.0336634	0.192752	1	2697	tags=31%, list=16%, signal=36%
GO_REGULATION_OF_NECROTIC_CELL_DEATH	GO_REGULATION_OF_NECROTIC_CELL_DEATH		24	0.604832	1.49834	0.0332681	0.192854	1	2530	tags=42%, list=15%, signal=49%
GO_ACTIVATION_OF_CYSTEINE_TYPE_ENDOPEPTIDASE_ACTIVITY	GO_ACTIVATION_OF_CYSTEINE_TYPE_ENDOPEPTIDASE_ACTIVITY		90	0.505733	1.50624	0.0139165	0.192908	1	3354	tags=36%, list=19%, signal=44%
GO_REGULATION_OF_MONONUCLEAR_CELL_MIGRATION	GO_REGULATION_OF_MONONUCLEAR_CELL_MIGRATION		15	0.83318	1.51586	0.00196078	0.192962	1	1112	tags=47%, list=6%, signal=50%
GO_PTERIDINE_CONTAINING_COMPOUND_METABOLIC_PROCESS	GO_PTERIDINE_CONTAINING_COMPOUND_METABOLIC_PROCESS		32	0.570413	1.50187	0.0273438	0.193016	1	2080	tags=28%, list=12%, signal=32%
GO_NEGATIVE_REGULATION_OF_PROTEIN_TYROSINE_KINASE_ACTIVITY	GO_NEGATIVE_REGULATION_OF_PROTEIN_TYROSINE_KINASE_ACTIVITY		18	0.671032	1.50817	0.0472279	0.193025	1	3078	tags=44%, list=18%, signal=54%
GO_CELLULAR_RESPONSE_TO_EXTERNAL_STIMULUS	GO_CELLULAR_RESPONSE_TO_EXTERNAL_STIMULUS		251	0.497304	1.50578	0.00572519	0.193041	1	3084	tags=41%, list=18%, signal=49%
GO_REGULATION_OF_TOLL_LIKE_RECEPTOR_SIGNALING_PATHWAY	GO_REGULATION_OF_TOLL_LIKE_RECEPTOR_SIGNALING_PATHWAY		45	0.667979	1.49913	0.0330739	0.193044	1	1887	tags=38%, list=11%, signal=42%
GO_PHOSPHATIDYLCHOLINE_METABOLIC_PROCESS	GO_PHOSPHATIDYLCHOLINE_METABOLIC_PROCESS		58	0.469048	1.49885	0.028	0.193059	1	4053	tags=34%, list=24%, signal=45%
GO_LEUKOCYTE_CHEMOTAXIS	GO_LEUKOCYTE_CHEMOTAXIS		104	0.653524	1.50215	0.0261194	0.193086	1	1554	tags=31%, list=9%, signal=34%
GO_REGULATION_OF_ACUTE_INFLAMMATORY_RESPONSE	GO_REGULATION_OF_ACUTE_INFLAMMATORY_RESPONSE		66	0.640898	1.50065	0.037594	0.193089	1	2294	tags=36%, list=13%, signal=42%
GO_REGULATION_OF_MYELOID_LEUKOCYTE_DIFFERENTIATION	GO_REGULATION_OF_MYELOID_LEUKOCYTE_DIFFERENTIATION		101	0.517636	1.50275	0.026616	0.19319	1	2885	tags=33%, list=17%, signal=39%
GO_FAT_SOLUBLE_VITAMIN_METABOLIC_PROCESS	GO_FAT_SOLUBLE_VITAMIN_METABOLIC_PROCESS		29	0.615672	1.50086	0.0215686	0.193264	1	4156	tags=45%, list=24%, signal=59%
GO_RESPONSE_TO_FUNGUS	GO_RESPONSE_TO_FUNGUS		48	0.671094	1.49838	0.0268199	0.193297	1	2496	tags=40%, list=15%, signal=46%
GO_POSITIVE_REGULATION_OF_ACTIVATED_T_CELL_PROLIFERATION	GO_POSITIVE_REGULATION_OF_ACTIVATED_T_CELL_PROLIFERATION		27	0.60862	1.50234	0.0579151	0.193303	1	746	tags=19%, list=4%, signal=19%
GO_POSITIVE_REGULATION_OF_INNATE_IMMUNE_RESPONSE	GO_POSITIVE_REGULATION_OF_INNATE_IMMUNE_RESPONSE		231	0.52709	1.50142	0.0519231	0.193331	1	2615	tags=34%, list=15%, signal=39%
GO_REGULATION_OF_ALPHA_BETA_T_CELL_ACTIVATION	GO_REGULATION_OF_ALPHA_BETA_T_CELL_ACTIVATION		66	0.569155	1.50626	0.0637899	0.193387	1	3032	tags=39%, list=18%, signal=48%
GO_SYNCYTIUM_FORMATION	GO_SYNCYTIUM_FORMATION		24	0.535766	1.50694	0.0571992	0.193417	1	1689	tags=21%, list=10%, signal=23%
GO_PLATELET_AGGREGATION	GO_PLATELET_AGGREGATION		35	0.622053	1.5159	0.0368932	0.193478	1	2387	tags=43%, list=14%, signal=50%
GO_MACROPHAGE_ACTIVATION	GO_MACROPHAGE_ACTIVATION		30	0.699216	1.49917	0.0586011	0.19348	1	2167	tags=47%, list=13%, signal=53%
GO_LUNG_ALVEOLUS_DEVELOPMENT	GO_LUNG_ALVEOLUS_DEVELOPMENT		37	0.628766	1.50285	0.0234375	0.193555	1	1813	tags=32%, list=11%, signal=36%
GO_POSITIVE_REGULATION_OF_MYELOID_CELL_DIFFERENTIATION	GO_POSITIVE_REGULATION_OF_MYELOID_CELL_DIFFERENTIATION		77	0.52256	1.50507	0.028463	0.19358	1	1556	tags=23%, list=9%, signal=26%
GO_RESPONSE_TO_OSMOTIC_STRESS	GO_RESPONSE_TO_OSMOTIC_STRESS		61	0.537118	1.50374	0.0118343	0.193613	1	1643	tags=28%, list=10%, signal=31%
GO_REGULATION_OF_TUMOR_NECROSIS_FACTOR_MEDIATED_SIGNALING_PATHWAY	GO_REGULATION_OF_TUMOR_NECROSIS_FACTOR_MEDIATED_SIGNALING_PATHWAY		43	0.542928	1.5009	0.0311284	0.193699	1	2630	tags=35%, list=15%, signal=41%
GO_VITAMIN_METABOLIC_PROCESS	GO_VITAMIN_METABOLIC_PROCESS		107	0.445693	1.50337	0.00393701	0.193711	1	3959	tags=36%, list=23%, signal=46%
GO_CELLULAR_RESPONSE_TO_INORGANIC_SUBSTANCE	GO_CELLULAR_RESPONSE_TO_INORGANIC_SUBSTANCE		139	0.502699	1.5074	0	0.193742	1	2177	tags=29%, list=13%, signal=33%
GO_MYELOID_LEUKOCYTE_MIGRATION	GO_MYELOID_LEUKOCYTE_MIGRATION		86	0.644895	1.50303	0.0260708	0.193758	1	2127	tags=33%, list=12%, signal=37%
GO_FATTY_ACID_DERIVATIVE_METABOLIC_PROCESS	GO_FATTY_ACID_DERIVATIVE_METABOLIC_PROCESS		86	0.538914	1.50636	0.0350877	0.193779	1	1759	tags=23%, list=10%, signal=26%
GO_RENAL_SYSTEM_PROCESS_INVOLVED_IN_REGULATION_OF_SYSTEMIC_ARTERIAL_BLOOD_PRESSURE	GO_RENAL_SYSTEM_PROCESS_INVOLVED_IN_REGULATION_OF_SYSTEMIC_ARTERIAL_BLOOD_PRESSURE		23	0.606949	1.50697	0.0318352	0.193906	1	2387	tags=35%, list=14%, signal=40%
GO_GLYCOSYL_COMPOUND_CATABOLIC_PROCESS	GO_GLYCOSYL_COMPOUND_CATABOLIC_PROCESS		38	0.573156	1.51596	0.0194175	0.193942	1	1730	tags=29%, list=10%, signal=32%
GO_POSITIVE_REGULATION_OF_BLOOD_VESSEL_ENDOTHELIAL_CELL_MIGRATION	GO_POSITIVE_REGULATION_OF_BLOOD_VESSEL_ENDOTHELIAL_CELL_MIGRATION		24	0.70499	1.50384	0.0241935	0.193979	1	1449	tags=38%, list=8%, signal=41%
GO_REGULATION_OF_EXTRINSIC_APOPTOTIC_SIGNALING_PATHWAY_VIA_DEATH_DOMAIN_RECEPTORS	GO_REGULATION_OF_EXTRINSIC_APOPTOTIC_SIGNALING_PATHWAY_VIA_DEATH_DOMAIN_RECEPTORS		52	0.613164	1.49404	0.0392157	0.193994	1	3501	tags=46%, list=20%, signal=58%
GO_MONOSACCHARIDE_TRANSPORT	GO_MONOSACCHARIDE_TRANSPORT		51	0.497907	1.5044	0.0234375	0.194127	1	2332	tags=24%, list=14%, signal=27%
GO_APOPTOTIC_SIGNALING_PATHWAY	GO_APOPTOTIC_SIGNALING_PATHWAY		276	0.446657	1.50403	0.00770713	0.194196	1	2529	tags=29%, list=15%, signal=34%
GO_RUFFLE_ORGANIZATION	GO_RUFFLE_ORGANIZATION		20	0.581348	1.51609	0.036	0.194271	1	3588	tags=50%, list=21%, signal=63%
GO_POSITIVE_REGULATION_OF_CELL_ACTIVATION	GO_POSITIVE_REGULATION_OF_CELL_ACTIVATION		274	0.550941	1.51656	0.046332	0.194653	1	2916	tags=38%, list=17%, signal=45%
GO_LEUKOCYTE_MIGRATION	GO_LEUKOCYTE_MIGRATION		241	0.606798	1.51612	0.0171103	0.194778	1	1961	tags=32%, list=11%, signal=35%
GO_REGULATION_OF_PHAGOCYTOSIS	GO_REGULATION_OF_PHAGOCYTOSIS		65	0.634557	1.51658	0.0332681	0.195182	1	2456	tags=42%, list=14%, signal=48%
GO_REGULATION_OF_T_CELL_DIFFERENTIATION	GO_REGULATION_OF_T_CELL_DIFFERENTIATION		99	0.51059	1.49287	0.0415094	0.195308	1	3041	tags=34%, list=18%, signal=41%
GO_EMBRYO_IMPLANTATION	GO_EMBRYO_IMPLANTATION		35	0.6602	1.51673	0.0275591	0.19543	1	1664	tags=34%, list=10%, signal=38%
GO_RESPONSE_TO_TOPOLOGICALLY_INCORRECT_PROTEIN	GO_RESPONSE_TO_TOPOLOGICALLY_INCORRECT_PROTEIN		145	0.445799	1.49069	0.0458891	0.195787	1	4416	tags=48%, list=26%, signal=63%
GO_CELLULAR_MODIFIED_AMINO_ACID_BIOSYNTHETIC_PROCESS	GO_CELLULAR_MODIFIED_AMINO_ACID_BIOSYNTHETIC_PROCESS		46	0.478988	1.51688	0.0237624	0.195844	1	3408	tags=35%, list=20%, signal=43%
GO_REGULATION_OF_LEUKOCYTE_MEDIATED_IMMUNITY	GO_REGULATION_OF_LEUKOCYTE_MEDIATED_IMMUNITY		145	0.513838	1.49096	0.0534351	0.19586	1	2910	tags=35%, list=17%, signal=42%
GO_POSITIVE_REGULATION_OF_INTERLEUKIN_8_PRODUCTION	GO_POSITIVE_REGULATION_OF_INTERLEUKIN_8_PRODUCTION		44	0.689152	1.49161	0.028626	0.195891	1	2848	tags=52%, list=17%, signal=62%
GO_LIPID_LOCALIZATION	GO_LIPID_LOCALIZATION		242	0.43047	1.49217	0.0139165	0.195909	1	2892	tags=29%, list=17%, signal=34%
GO_EXTRACELLULAR_MATRIX_ASSEMBLY	GO_EXTRACELLULAR_MATRIX_ASSEMBLY		16	0.736909	1.5172	0.00795229	0.195911	1	983	tags=38%, list=6%, signal=40%
GO_POSITIVE_REGULATION_OF_RESPONSE_TO_WOUNDING	GO_POSITIVE_REGULATION_OF_RESPONSE_TO_WOUNDING		152	0.59488	1.49184	0.031068	0.196032	1	2496	tags=34%, list=15%, signal=39%
GO_WOUND_HEALING	GO_WOUND_HEALING		420	0.513053	1.51732	0.0116505	0.196258	1	2456	tags=31%, list=14%, signal=35%
GO_REGULATION_OF_SYSTEMIC_ARTERIAL_BLOOD_PRESSURE	GO_REGULATION_OF_SYSTEMIC_ARTERIAL_BLOOD_PRESSURE		81	0.484477	1.49098	0.0291829	0.196324	1	2498	tags=20%, list=15%, signal=23%
GO_ALPHA_BETA_T_CELL_ACTIVATION	GO_ALPHA_BETA_T_CELL_ACTIVATION		53	0.578434	1.51756	0.0338346	0.196427	1	2275	tags=30%, list=13%, signal=35%
GO_NEGATIVE_REGULATION_OF_RESPONSE_TO_EXTERNAL_STIMULUS	GO_NEGATIVE_REGULATION_OF_RESPONSE_TO_EXTERNAL_STIMULUS		252	0.480291	1.51779	0.0138067	0.196631	1	3678	tags=38%, list=21%, signal=47%
GO_HEME_METABOLIC_PROCESS	GO_HEME_METABOLIC_PROCESS		26	0.503211	1.48903	0.0612245	0.196662	1	2974	tags=31%, list=17%, signal=37%
GO_ARACHIDONIC_ACID_METABOLIC_PROCESS	GO_ARACHIDONIC_ACID_METABOLIC_PROCESS		47	0.559289	1.48869	0.0460922	0.196729	1	1257	tags=23%, list=7%, signal=25%
GO_REGULATION_OF_HOMOTYPIC_CELL_CELL_ADHESION	GO_REGULATION_OF_HOMOTYPIC_CELL_CELL_ADHESION		280	0.500897	1.4898	0.0530303	0.196804	1	3095	tags=35%, list=18%, signal=42%
GO_FORMATION_OF_PRIMARY_GERM_LAYER	GO_FORMATION_OF_PRIMARY_GERM_LAYER		104	0.52751	1.4895	0.0193424	0.196826	1	1849	tags=30%, list=11%, signal=33%
GO_CELLULAR_RESPONSE_TO_INTERLEUKIN_1	GO_CELLULAR_RESPONSE_TO_INTERLEUKIN_1		79	0.557556	1.488	0.05	0.196848	1	1782	tags=25%, list=10%, signal=28%
GO_REGULATION_OF_PROTEIN_MATURATION	GO_REGULATION_OF_PROTEIN_MATURATION		70	0.604313	1.51793	0.0189036	0.196964	1	1231	tags=24%, list=7%, signal=26%
GO_NEGATIVE_REGULATION_OF_CALCIUM_MEDIATED_SIGNALING	GO_NEGATIVE_REGULATION_OF_CALCIUM_MEDIATED_SIGNALING		17	0.594037	1.48907	0.0529412	0.197072	1	2994	tags=35%, list=17%, signal=43%
GO_REGULATION_OF_PEPTIDYL_TYROSINE_PHOSPHORYLATION	GO_REGULATION_OF_PEPTIDYL_TYROSINE_PHOSPHORYLATION		201	0.477821	1.48755	0.0329457	0.197109	1	2424	tags=28%, list=14%, signal=32%
GO_CARBOHYDRATE_TRANSMEMBRANE_TRANSPORT	GO_CARBOHYDRATE_TRANSMEMBRANE_TRANSPORT		22	0.593392	1.48721	0.0334646	0.197153	1	2309	tags=27%, list=13%, signal=31%
GO_MATERNAL_PROCESS_INVOLVED_IN_FEMALE_PREGNANCY	GO_MATERNAL_PROCESS_INVOLVED_IN_FEMALE_PREGNANCY		57	0.601695	1.48808	0.0267686	0.197212	1	1702	tags=32%, list=10%, signal=35%
GO_NEGATIVE_REGULATION_OF_WOUND_HEALING	GO_NEGATIVE_REGULATION_OF_WOUND_HEALING		58	0.574495	1.51805	0.00772201	0.197381	1	1311	tags=24%, list=8%, signal=26%
GO_KERATINOCYTE_DIFFERENTIATION	GO_KERATINOCYTE_DIFFERENTIATION		76	0.444816	1.48658	0.0208333	0.197751	1	2211	tags=20%, list=13%, signal=23%
GO_REGULATION_OF_NITRIC_OXIDE_BIOSYNTHETIC_PROCESS	GO_REGULATION_OF_NITRIC_OXIDE_BIOSYNTHETIC_PROCESS		52	0.615152	1.48328	0.0444015	0.197899	1	3742	tags=54%, list=22%, signal=69%
GO_RESPONSE_TO_PROTOZOAN	GO_RESPONSE_TO_PROTOZOAN		20	0.673855	1.51808	0.0486891	0.197931	1	3371	tags=50%, list=20%, signal=62%
GO_EXOCRINE_SYSTEM_DEVELOPMENT	GO_EXOCRINE_SYSTEM_DEVELOPMENT		43	0.566539	1.48152	0.015534	0.197999	1	3733	tags=53%, list=22%, signal=68%
GO_MYELOID_CELL_DIFFERENTIATION	GO_MYELOID_CELL_DIFFERENTIATION		180	0.446309	1.48346	0.0230326	0.198072	1	2233	tags=28%, list=13%, signal=32%
GO_RECEPTOR_CATABOLIC_PROCESS	GO_RECEPTOR_CATABOLIC_PROCESS		16	0.591806	1.48282	0.0433071	0.198146	1	3569	tags=38%, list=21%, signal=47%
GO_T_CELL_MEDIATED_IMMUNITY	GO_T_CELL_MEDIATED_IMMUNITY		27	0.678437	1.48369	0.032197	0.198171	1	3873	tags=63%, list=23%, signal=81%
GO_POSITIVE_REGULATION_OF_LEUKOCYTE_MIGRATION	GO_POSITIVE_REGULATION_OF_LEUKOCYTE_MIGRATION		104	0.685352	1.51899	0.0194553	0.198195	1	2760	tags=45%, list=16%, signal=54%
GO_REGULATION_OF_APOPTOTIC_SIGNALING_PATHWAY	GO_REGULATION_OF_APOPTOTIC_SIGNALING_PATHWAY		337	0.427805	1.4816	0.018	0.198326	1	3309	tags=31%, list=19%, signal=38%
GO_NEGATIVE_REGULATION_OF_CALCIUM_ION_TRANSPORT_INTO_CYTOSOL	GO_NEGATIVE_REGULATION_OF_CALCIUM_ION_TRANSPORT_INTO_CYTOSOL		17	0.560288	1.48419	0.0592885	0.198339	1	2994	tags=29%, list=17%, signal=36%
GO_LEUKOCYTE_DIFFERENTIATION	GO_LEUKOCYTE_DIFFERENTIATION		283	0.48328	1.51818	0.0246212	0.198358	1	2846	tags=32%, list=17%, signal=38%
GO_GLUCAN_BIOSYNTHETIC_PROCESS	GO_GLUCAN_BIOSYNTHETIC_PROCESS		23	0.573875	1.48441	0.0597302	0.19843	1	4283	tags=52%, list=25%, signal=69%
GO_VASOCONSTRICTION	GO_VASOCONSTRICTION		28	0.560445	1.48373	0.0600414	0.198556	1	1703	tags=21%, list=10%, signal=24%
GO_POSITIVE_REGULATION_OF_IMMUNE_RESPONSE	GO_POSITIVE_REGULATION_OF_IMMUNE_RESPONSE		498	0.510627	1.48461	0.0660194	0.198602	1	2615	tags=31%, list=15%, signal=35%
GO_RESPONSE_TO_ENDOPLASMIC_RETICULUM_STRESS	GO_RESPONSE_TO_ENDOPLASMIC_RETICULUM_STRESS		209	0.389773	1.48194	0.0495238	0.198688	1	3716	tags=36%, list=22%, signal=46%
GO_POSITIVE_REGULATION_OF_OSTEOCLAST_DIFFERENTIATION	GO_POSITIVE_REGULATION_OF_OSTEOCLAST_DIFFERENTIATION		23	0.614997	1.48219	0.0483559	0.198705	1	1305	tags=26%, list=8%, signal=28%
GO_NEGATIVE_REGULATION_OF_INFLAMMATORY_RESPONSE	GO_NEGATIVE_REGULATION_OF_INFLAMMATORY_RESPONSE		88	0.493795	1.48164	0.0293542	0.198716	1	3502	tags=35%, list=20%, signal=44%
GO_RESPONSE_TO_NUTRIENT	GO_RESPONSE_TO_NUTRIENT		187	0.490738	1.48539	0.00782779	0.198716	1	2204	tags=27%, list=13%, signal=31%
GO_ENDODERMAL_CELL_DIFFERENTIATION	GO_ENDODERMAL_CELL_DIFFERENTIATION		37	0.680617	1.51899	0.0311891	0.198774	1	1665	tags=38%, list=10%, signal=42%
GO_ACTIVATION_OF_INNATE_IMMUNE_RESPONSE	GO_ACTIVATION_OF_INNATE_IMMUNE_RESPONSE		191	0.53623	1.48565	0.0655106	0.198782	1	2615	tags=36%, list=15%, signal=42%
GO_IRON_ION_HOMEOSTASIS	GO_IRON_ION_HOMEOSTASIS		62	0.539704	1.5183	0.0276134	0.198804	1	1647	tags=23%, list=10%, signal=25%
GO_RESPONSE_TO_METAL_ION	GO_RESPONSE_TO_METAL_ION		311	0.467979	1.48045	0.0019685	0.198816	1	2624	tags=30%, list=15%, signal=35%
GO_REGULATION_OF_TYPE_I_INTERFERON_PRODUCTION	GO_REGULATION_OF_TYPE_I_INTERFERON_PRODUCTION		101	0.548061	1.5193	0.042471	0.198905	1	2816	tags=36%, list=16%, signal=42%
GO_POSITIVE_REGULATION_OF_CYTOKINE_SECRETION	GO_POSITIVE_REGULATION_OF_CYTOKINE_SECRETION		89	0.568716	1.48467	0.0289575	0.198981	1	3988	tags=52%, list=23%, signal=67%
GO_RESPONSE_TO_VITAMIN_D	GO_RESPONSE_TO_VITAMIN_D		33	0.68944	1.5196	0.0078125	0.199028	1	1952	tags=39%, list=11%, signal=44%
GO_REGULATION_OF_B_CELL_DIFFERENTIATION	GO_REGULATION_OF_B_CELL_DIFFERENTIATION		22	0.602713	1.48058	0.0676983	0.199057	1	3041	tags=41%, list=18%, signal=50%
GO_POSITIVE_REGULATION_OF_B_CELL_PROLIFERATION	GO_POSITIVE_REGULATION_OF_B_CELL_PROLIFERATION		36	0.624077	1.4848	0.046875	0.199223	1	2900	tags=36%, list=17%, signal=43%
GO_RESPONSE_TO_KETONE	GO_RESPONSE_TO_KETONE		175	0.498051	1.4737	0.01341	0.199346	1	2529	tags=31%, list=15%, signal=36%
GO_HETEROTYPIC_CELL_CELL_ADHESION	GO_HETEROTYPIC_CELL_CELL_ADHESION		26	0.695996	1.46752	0.021611	0.199491	1	1256	tags=38%, list=7%, signal=41%
GO_REGULATION_OF_RESPONSE_TO_INTERFERON_GAMMA	GO_REGULATION_OF_RESPONSE_TO_INTERFERON_GAMMA		21	0.54754	1.47519	0.0764706	0.199525	1	2616	tags=38%, list=15%, signal=45%
GO_I_KAPPAB_KINASE_NF_KAPPAB_SIGNALING	GO_I_KAPPAB_KINASE_NF_KAPPAB_SIGNALING		63	0.583016	1.5204	0.042471	0.199559	1	3865	tags=51%, list=22%, signal=65%
GO_POSITIVE_REGULATION_OF_LEUKOCYTE_DEGRANULATION	GO_POSITIVE_REGULATION_OF_LEUKOCYTE_DEGRANULATION		17	0.719779	1.47331	0.0516899	0.199568	1	2294	tags=53%, list=13%, signal=61%
GO_REGULATION_OF_NF_KAPPAB_IMPORT_INTO_NUCLEUS	GO_REGULATION_OF_NF_KAPPAB_IMPORT_INTO_NUCLEUS		44	0.621981	1.51966	0.0273973	0.199588	1	2921	tags=45%, list=17%, signal=55%
GO_REGULATION_OF_PROTEIN_ACTIVATION_CASCADE	GO_REGULATION_OF_PROTEIN_ACTIVATION_CASCADE		31	0.698432	1.46914	0.039924	0.199607	1	896	tags=29%, list=5%, signal=31%
GO_UNSATURATED_FATTY_ACID_METABOLIC_PROCESS	GO_UNSATURATED_FATTY_ACID_METABOLIC_PROCESS		98	0.531664	1.52	0.0294118	0.199656	1	1783	tags=23%, list=10%, signal=26%
GO_AMINOGLYCAN_METABOLIC_PROCESS	GO_AMINOGLYCAN_METABOLIC_PROCESS		160	0.532836	1.4789	0.00201207	0.199662	1	3226	tags=42%, list=19%, signal=51%
GO_NEGATIVE_REGULATION_OF_ENDOTHELIAL_CELL_APOPTOTIC_PROCESS	GO_NEGATIVE_REGULATION_OF_ENDOTHELIAL_CELL_APOPTOTIC_PROCESS		27	0.655513	1.52065	0.0196078	0.199703	1	2707	tags=33%, list=16%, signal=39%
GO_RESPONSE_TO_SALT_STRESS	GO_RESPONSE_TO_SALT_STRESS		19	0.596926	1.46932	0.0451866	0.199753	1	2529	tags=26%, list=15%, signal=31%
GO_POSITIVE_REGULATION_OF_MAPK_CASCADE	GO_POSITIVE_REGULATION_OF_MAPK_CASCADE		430	0.440392	1.46761	0.0039604	0.199759	1	2619	tags=25%, list=15%, signal=29%
GO_PHAGOCYTOSIS	GO_PHAGOCYTOSIS		160	0.517098	1.47096	0.0525292	0.199763	1	2486	tags=33%, list=14%, signal=38%
GO_RESPONSE_TO_REACTIVE_OXYGEN_SPECIES	GO_RESPONSE_TO_REACTIVE_OXYGEN_SPECIES		184	0.507308	1.47909	0.0113636	0.19977	1	2204	tags=30%, list=13%, signal=35%
GO_REGULATION_OF_HUMORAL_IMMUNE_RESPONSE	GO_REGULATION_OF_HUMORAL_IMMUNE_RESPONSE		43	0.638186	1.47794	0.0466019	0.199771	1	1076	tags=23%, list=6%, signal=25%
GO_MYELOID_LEUKOCYTE_ACTIVATION	GO_MYELOID_LEUKOCYTE_ACTIVATION		92	0.619375	1.46842	0.0619137	0.199772	1	3046	tags=51%, list=18%, signal=62%
GO_REGULATION_OF_TUMOR_NECROSIS_FACTOR_SUPERFAMILY_CYTOKINE_PRODUCTION	GO_REGULATION_OF_TUMOR_NECROSIS_FACTOR_SUPERFAMILY_CYTOKINE_PRODUCTION		92	0.633802	1.4737	0.0449219	0.199772	1	3934	tags=55%, list=23%, signal=71%
GO_POSITIVE_REGULATION_OF_INTERFERON_GAMMA_PRODUCTION	GO_POSITIVE_REGULATION_OF_INTERFERON_GAMMA_PRODUCTION		60	0.617527	1.47821	0.0697674	0.199804	1	1737	tags=33%, list=10%, signal=37%
GO_ENDODERM_DEVELOPMENT	GO_ENDODERM_DEVELOPMENT		67	0.582776	1.4723	0.0489237	0.19981	1	1849	tags=34%, list=11%, signal=38%
GO_RESPONSE_TO_CORTICOSTEROID	GO_RESPONSE_TO_CORTICOSTEROID		168	0.510647	1.47762	0.0176125	0.199856	1	2202	tags=27%, list=13%, signal=30%
GO_TEMPERATURE_HOMEOSTASIS	GO_TEMPERATURE_HOMEOSTASIS		26	0.555397	1.47057	0.0585938	0.199886	1	2866	tags=42%, list=17%, signal=51%
GO_CELL_CHEMOTAXIS	GO_CELL_CHEMOTAXIS		146	0.618949	1.46801	0.0379507	0.199893	1	1554	tags=31%, list=9%, signal=34%
GO_CELLULAR_RESPONSE_TO_MECHANICAL_STIMULUS	GO_CELLULAR_RESPONSE_TO_MECHANICAL_STIMULUS		79	0.59137	1.47522	0.0288462	0.199898	1	2737	tags=47%, list=16%, signal=55%
GO_RESPONSE_TO_EXTRACELLULAR_STIMULUS	GO_RESPONSE_TO_EXTRACELLULAR_STIMULUS		420	0.416811	1.46861	0.0116959	0.199898	1	3089	tags=29%, list=18%, signal=35%
GO_WATER_TRANSPORT	GO_WATER_TRANSPORT		18	0.712638	1.47111	0.0353635	0.199943	1	1004	tags=28%, list=6%, signal=29%
GO_STEROL_METABOLIC_PROCESS	GO_STEROL_METABOLIC_PROCESS		118	0.412413	1.47952	0.0382409	0.199955	1	2993	tags=25%, list=17%, signal=30%
GO_POSITIVE_REGULATION_OF_RECEPTOR_INTERNALIZATION	GO_POSITIVE_REGULATION_OF_RECEPTOR_INTERNALIZATION		23	0.63069	1.46946	0.0411765	0.19996	1	2301	tags=35%, list=13%, signal=40%
GO_MEMBRANE_PROTEIN_INTRACELLULAR_DOMAIN_PROTEOLYSIS	GO_MEMBRANE_PROTEIN_INTRACELLULAR_DOMAIN_PROTEOLYSIS		16	0.637747	1.47413	0.0792079	0.199977	1	4835	tags=75%, list=28%, signal=104%
GO_T_CELL_DIFFERENTIATION	GO_T_CELL_DIFFERENTIATION		123	0.500167	1.47385	0.0511364	0.200005	1	2295	tags=28%, list=13%, signal=33%
GO_REGULATION_OF_VASOCONSTRICTION	GO_REGULATION_OF_VASOCONSTRICTION		65	0.533398	1.4784	0.0384615	0.200008	1	1703	tags=22%, list=10%, signal=24%
GO_RESPONSE_TO_UV_B	GO_RESPONSE_TO_UV_B		16	0.592757	1.46616	0.0674374	0.200019	1	1127	tags=19%, list=7%, signal=20%
GO_PROTEIN_LOCALIZATION_TO_CELL_SURFACE	GO_PROTEIN_LOCALIZATION_TO_CELL_SURFACE		21	0.608892	1.46768	0.0412574	0.20005	1	1679	tags=33%, list=10%, signal=37%
GO_REGULATION_OF_REACTIVE_OXYGEN_SPECIES_BIOSYNTHETIC_PROCESS	GO_REGULATION_OF_REACTIVE_OXYGEN_SPECIES_BIOSYNTHETIC_PROCESS		64	0.569477	1.47152	0.0419847	0.200078	1	3742	tags=48%, list=22%, signal=62%
GO_REGULATION_OF_CYTOKINE_PRODUCTION_INVOLVED_IN_IMMUNE_RESPONSE	GO_REGULATION_OF_CYTOKINE_PRODUCTION_INVOLVED_IN_IMMUNE_RESPONSE		55	0.657871	1.52154	0.0114286	0.200088	1	2910	tags=49%, list=17%, signal=59%
GO_POSITIVE_REGULATION_OF_PEPTIDYL_SERINE_PHOSPHORYLATION	GO_POSITIVE_REGULATION_OF_PEPTIDYL_SERINE_PHOSPHORYLATION		81	0.467961	1.47124	0.0469667	0.20013	1	2593	tags=22%, list=15%, signal=26%
GO_CELLULAR_RESPONSE_TO_EXTRACELLULAR_STIMULUS	GO_CELLULAR_RESPONSE_TO_EXTRACELLULAR_STIMULUS		176	0.458779	1.46958	0.0113208	0.200184	1	3084	tags=37%, list=18%, signal=45%
GO_RESPONSE_TO_INCREASED_OXYGEN_LEVELS	GO_RESPONSE_TO_INCREASED_OXYGEN_LEVELS		23	0.68208	1.47232	0.0250482	0.200188	1	2192	tags=43%, list=13%, signal=50%
GO_CELLULAR_RESPONSE_TO_RETINOIC_ACID	GO_CELLULAR_RESPONSE_TO_RETINOIC_ACID		58	0.538003	1.47911	0.0196464	0.200203	1	2192	tags=22%, list=13%, signal=26%
GO_REGULATION_OF_CELLULAR_PH	GO_REGULATION_OF_CELLULAR_PH		69	0.410922	1.4745	0.0218254	0.200253	1	2281	tags=22%, list=13%, signal=25%
GO_DECIDUALIZATION	GO_DECIDUALIZATION		20	0.740708	1.47168	0.0380952	0.200264	1	1406	tags=40%, list=8%, signal=44%
GO_LYMPHOCYTE_MIGRATION	GO_LYMPHOCYTE_MIGRATION		42	0.633995	1.52067	0.0406977	0.200279	1	3934	tags=38%, list=23%, signal=49%
GO_PLATELET_ACTIVATION	GO_PLATELET_ACTIVATION		131	0.508776	1.47525	0.0396975	0.200284	1	2456	tags=31%, list=14%, signal=36%
GO_INTRINSIC_APOPTOTIC_SIGNALING_PATHWAY_IN_RESPONSE_TO_ENDOPLASMIC_RETICULUM_STRESS	GO_INTRINSIC_APOPTOTIC_SIGNALING_PATHWAY_IN_RESPONSE_TO_ENDOPLASMIC_RETICULUM_STRESS		28	0.567572	1.46516	0.0314961	0.20033	1	3635	tags=54%, list=21%, signal=68%
GO_POSITIVE_REGULATION_OF_LAMELLIPODIUM_ASSEMBLY	GO_POSITIVE_REGULATION_OF_LAMELLIPODIUM_ASSEMBLY		15	0.520671	1.47418	0.078	0.200345	1	4047	tags=47%, list=24%, signal=61%
GO_REGULATION_OF_ALPHA_BETA_T_CELL_PROLIFERATION	GO_REGULATION_OF_ALPHA_BETA_T_CELL_PROLIFERATION		22	0.687502	1.46492	0.0721248	0.200348	1	2574	tags=45%, list=15%, signal=53%
GO_REGULATION_OF_LEUKOCYTE_CHEMOTAXIS	GO_REGULATION_OF_LEUKOCYTE_CHEMOTAXIS		90	0.665053	1.46975	0.0381526	0.200357	1	3092	tags=49%, list=18%, signal=59%
GO_LYMPHOCYTE_DIFFERENTIATION	GO_LYMPHOCYTE_DIFFERENTIATION		203	0.456308	1.47651	0.0538462	0.200367	1	3499	tags=33%, list=20%, signal=41%
GO_POSITIVE_REGULATION_OF_PROTEIN_MATURATION	GO_POSITIVE_REGULATION_OF_PROTEIN_MATURATION		15	0.6603	1.46672	0.0422018	0.200376	1	4693	tags=60%, list=27%, signal=82%
GO_POSITIVE_REGULATION_OF_LEUKOCYTE_CHEMOTAXIS	GO_POSITIVE_REGULATION_OF_LEUKOCYTE_CHEMOTAXIS		78	0.690851	1.46998	0.0318725	0.200389	1	3092	tags=50%, list=18%, signal=61%
GO_SKIN_DEVELOPMENT	GO_SKIN_DEVELOPMENT		182	0.443904	1.46618	0.00197239	0.200393	1	2211	tags=21%, list=13%, signal=24%
GO_RESPONSE_TO_OXYGEN_LEVELS	GO_RESPONSE_TO_OXYGEN_LEVELS		293	0.503394	1.52171	0.0117417	0.2004	1	1940	tags=27%, list=11%, signal=30%
GO_POST_TRANSLATIONAL_PROTEIN_MODIFICATION	GO_POST_TRANSLATIONAL_PROTEIN_MODIFICATION		30	0.571225	1.52095	0.0442308	0.200428	1	1898	tags=30%, list=11%, signal=34%
GO_NEGATIVE_REGULATION_OF_VIRAL_GENOME_REPLICATION	GO_NEGATIVE_REGULATION_OF_VIRAL_GENOME_REPLICATION		44	0.708902	1.47592	0.0338346	0.20045	1	1853	tags=50%, list=11%, signal=56%
GO_B_CELL_ACTIVATION	GO_B_CELL_ACTIVATION		123	0.472838	1.4664	0.0569745	0.20046	1	3112	tags=30%, list=18%, signal=36%
GO_EMBRYONIC_PLACENTA_MORPHOGENESIS	GO_EMBRYONIC_PLACENTA_MORPHOGENESIS		21	0.577698	1.47536	0.0363985	0.200544	1	2942	tags=43%, list=17%, signal=52%
GO_PROTEIN_LIPID_COMPLEX_SUBUNIT_ORGANIZATION	GO_PROTEIN_LIPID_COMPLEX_SUBUNIT_ORGANIZATION		34	0.624304	1.47664	0.0385396	0.200564	1	1704	tags=29%, list=10%, signal=33%
GO_FATTY_ACID_DERIVATIVE_BIOSYNTHETIC_PROCESS	GO_FATTY_ACID_DERIVATIVE_BIOSYNTHETIC_PROCESS		39	0.643378	1.46526	0.0674374	0.200592	1	2294	tags=41%, list=13%, signal=47%
GO_CELL_SUBSTRATE_JUNCTION_ASSEMBLY	GO_CELL_SUBSTRATE_JUNCTION_ASSEMBLY		40	0.560805	1.4756	0.0701403	0.200593	1	1874	tags=30%, list=11%, signal=34%
GO_REGULATION_OF_ANTIGEN_PROCESSING_AND_PRESENTATION	GO_REGULATION_OF_ANTIGEN_PROCESSING_AND_PRESENTATION		23	0.711614	1.47234	0.0574713	0.2006	1	2598	tags=57%, list=15%, signal=66%
GO_REGULATION_OF_ALPHA_BETA_T_CELL_DIFFERENTIATION	GO_REGULATION_OF_ALPHA_BETA_T_CELL_DIFFERENTIATION		45	0.553627	1.46553	0.0704762	0.200633	1	1980	tags=29%, list=12%, signal=33%
GO_POSITIVE_REGULATION_OF_INFLAMMATORY_RESPONSE	GO_POSITIVE_REGULATION_OF_INFLAMMATORY_RESPONSE		105	0.628736	1.47607	0.0438095	0.200677	1	2342	tags=36%, list=14%, signal=42%
GO_TRANSITION_METAL_ION_HOMEOSTASIS	GO_TRANSITION_METAL_ION_HOMEOSTASIS		98	0.520457	1.53215	0.0194175	0.200694	0.999	2980	tags=34%, list=17%, signal=40%
GO_POSITIVE_REGULATION_OF_TRANSLATIONAL_INITIATION	GO_POSITIVE_REGULATION_OF_TRANSLATIONAL_INITIATION		21	0.563984	1.47683	0.0608365	0.200721	1	702	tags=14%, list=4%, signal=15%
GO_COMPLEMENT_ACTIVATION	GO_COMPLEMENT_ACTIVATION		51	0.716384	1.45924	0.0410156	0.200769	1	1375	tags=35%, list=8%, signal=38%
GO_RESPONSE_TO_INORGANIC_SUBSTANCE	GO_RESPONSE_TO_INORGANIC_SUBSTANCE		449	0.473439	1.52217	0.0019305	0.200872	1	2204	tags=27%, list=13%, signal=31%
GO_CELLULAR_RESPONSE_TO_OSMOTIC_STRESS	GO_CELLULAR_RESPONSE_TO_OSMOTIC_STRESS		20	0.625716	1.45966	0.0167715	0.200934	1	1643	tags=40%, list=10%, signal=44%
GO_RESPONSE_TO_PROGESTERONE	GO_RESPONSE_TO_PROGESTERONE		47	0.661151	1.52176	0.015748	0.200962	1	1305	tags=36%, list=8%, signal=39%
GO_REGULATION_OF_VASCULAR_ENDOTHELIAL_GROWTH_FACTOR_PRODUCTION	GO_REGULATION_OF_VASCULAR_ENDOTHELIAL_GROWTH_FACTOR_PRODUCTION		29	0.729336	1.464	0.023301	0.200992	1	1651	tags=45%, list=10%, signal=50%
GO_NEGATIVE_REGULATION_OF_LEUKOCYTE_PROLIFERATION	GO_NEGATIVE_REGULATION_OF_LEUKOCYTE_PROLIFERATION		61	0.594542	1.53154	0.03861	0.201063	0.999	2816	tags=46%, list=16%, signal=55%
GO_REGULATION_OF_CHEMOTAXIS	GO_REGULATION_OF_CHEMOTAXIS		171	0.566845	1.46369	0.0257937	0.201064	1	3128	tags=42%, list=18%, signal=50%
GO_NITROGEN_CYCLE_METABOLIC_PROCESS	GO_NITROGEN_CYCLE_METABOLIC_PROCESS		15	0.638991	1.4593	0.0462428	0.201087	1	1465	tags=33%, list=9%, signal=36%
GO_POSITIVE_REGULATION_OF_STRIATED_MUSCLE_CELL_DIFFERENTIATION	GO_POSITIVE_REGULATION_OF_STRIATED_MUSCLE_CELL_DIFFERENTIATION		49	0.484414	1.4642	0.0241935	0.201112	1	2655	tags=29%, list=15%, signal=34%
GO_ACTIVATION_OF_IMMUNE_RESPONSE	GO_ACTIVATION_OF_IMMUNE_RESPONSE		376	0.510862	1.45978	0.0809249	0.201147	1	2615	tags=31%, list=15%, signal=36%
GO_REGULATION_OF_NATURAL_KILLER_CELL_ACTIVATION	GO_REGULATION_OF_NATURAL_KILLER_CELL_ACTIVATION		24	0.555855	1.45999	0.0611855	0.201184	1	3780	tags=46%, list=22%, signal=59%
GO_REGULATION_OF_CELL_CELL_ADHESION	GO_REGULATION_OF_CELL_CELL_ADHESION		347	0.475421	1.46051	0.0559846	0.201196	1	3095	tags=33%, list=18%, signal=40%
GO_NEGATIVE_REGULATION_OF_PEPTIDYL_TYROSINE_PHOSPHORYLATION	GO_NEGATIVE_REGULATION_OF_PEPTIDYL_TYROSINE_PHOSPHORYLATION		36	0.581062	1.46073	0.0625	0.201271	1	3141	tags=42%, list=18%, signal=51%
GO_POSITIVE_REGULATION_OF_IMMUNE_EFFECTOR_PROCESS	GO_POSITIVE_REGULATION_OF_IMMUNE_EFFECTOR_PROCESS		144	0.547659	1.53223	0.0327553	0.201298	0.999	2910	tags=35%, list=17%, signal=41%
GO_MODIFICATION_BY_SYMBIONT_OF_HOST_MORPHOLOGY_OR_PHYSIOLOGY	GO_MODIFICATION_BY_SYMBIONT_OF_HOST_MORPHOLOGY_OR_PHYSIOLOGY		41	0.449698	1.46011	0.0606654	0.201407	1	3244	tags=37%, list=19%, signal=45%
GO_NEGATIVE_REGULATION_OF_LIPID_TRANSPORT	GO_NEGATIVE_REGULATION_OF_LIPID_TRANSPORT		26	0.54192	1.53254	0.0345528	0.201471	0.999	4091	tags=42%, list=24%, signal=55%
GO_POSITIVE_REGULATION_OF_B_CELL_ACTIVATION	GO_POSITIVE_REGULATION_OF_B_CELL_ACTIVATION		70	0.626806	1.5222	0.031746	0.201487	1	3969	tags=49%, list=23%, signal=63%
GO_RESPONSE_TO_OXIDATIVE_STRESS	GO_RESPONSE_TO_OXIDATIVE_STRESS		331	0.450023	1.46166	0.0114504	0.201518	1	2716	tags=28%, list=16%, signal=33%
GO_GLUCOSE_CATABOLIC_PROCESS	GO_GLUCOSE_CATABOLIC_PROCESS		27	0.593289	1.45822	0.0791075	0.20155	1	2723	tags=41%, list=16%, signal=48%
GO_JAK_STAT_CASCADE_INVOLVED_IN_GROWTH_HORMONE_SIGNALING_PATHWAY	GO_JAK_STAT_CASCADE_INVOLVED_IN_GROWTH_HORMONE_SIGNALING_PATHWAY		15	0.572918	1.46077	0.0806142	0.201606	1	795	tags=13%, list=5%, signal=14%
GO_REGULATION_OF_INTERLEUKIN_6_PRODUCTION	GO_REGULATION_OF_INTERLEUKIN_6_PRODUCTION		96	0.601977	1.5229	0.0384615	0.20166	1	3842	tags=52%, list=22%, signal=67%
GO_POSITIVE_REGULATION_OF_CHEMOTAXIS	GO_POSITIVE_REGULATION_OF_CHEMOTAXIS		116	0.62113	1.46128	0.0318091	0.201669	1	3128	tags=46%, list=18%, signal=55%
GO_POSITIVE_REGULATION_OF_PROTEOLYSIS	GO_POSITIVE_REGULATION_OF_PROTEOLYSIS		333	0.39806	1.46181	0.0267686	0.201702	1	3569	tags=30%, list=21%, signal=37%
GO_RESPONSE_TO_ANGIOTENSIN	GO_RESPONSE_TO_ANGIOTENSIN		15	0.700086	1.53069	0.028463	0.201765	1	1703	tags=33%, list=10%, signal=37%
GO_EMBRYONIC_PLACENTA_DEVELOPMENT	GO_EMBRYONIC_PLACENTA_DEVELOPMENT		79	0.491608	1.5224	0.0190114	0.201816	1	2211	tags=27%, list=13%, signal=30%
GO_NEGATIVE_REGULATION_OF_CARBOHYDRATE_METABOLIC_PROCESS	GO_NEGATIVE_REGULATION_OF_CARBOHYDRATE_METABOLIC_PROCESS		41	0.456134	1.45828	0.040856	0.201858	1	2866	tags=22%, list=17%, signal=26%
GO_REGULATION_OF_BLOOD_PRESSURE	GO_REGULATION_OF_BLOOD_PRESSURE		160	0.479998	1.53268	0.00779727	0.201874	0.999	2223	tags=22%, list=13%, signal=25%
GO_POSITIVE_REGULATION_OF_PEPTIDASE_ACTIVITY	GO_POSITIVE_REGULATION_OF_PEPTIDASE_ACTIVITY		143	0.449472	1.46078	0.0292969	0.201991	1	3354	tags=33%, list=19%, signal=40%
GO_RESPONSE_TO_INTERFERON_BETA	GO_RESPONSE_TO_INTERFERON_BETA		20	0.754015	1.46261	0.0512334	0.202003	1	1810	tags=50%, list=11%, signal=56%
GO_BODY_FLUID_SECRETION	GO_BODY_FLUID_SECRETION		67	0.443342	1.46185	0.0382294	0.202022	1	1830	tags=18%, list=11%, signal=20%
GO_MONOSACCHARIDE_CATABOLIC_PROCESS	GO_MONOSACCHARIDE_CATABOLIC_PROCESS		54	0.494109	1.52778	0.0425101	0.202032	1	3059	tags=33%, list=18%, signal=40%
GO_REGULATION_OF_REACTIVE_OXYGEN_SPECIES_METABOLIC_PROCESS	GO_REGULATION_OF_REACTIVE_OXYGEN_SPECIES_METABOLIC_PROCESS		145	0.526045	1.46279	0.0277228	0.202088	1	2217	tags=30%, list=13%, signal=35%
GO_REGULATION_OF_LEUKOCYTE_DEGRANULATION	GO_REGULATION_OF_LEUKOCYTE_DEGRANULATION		40	0.615246	1.45749	0.0706107	0.202205	1	3365	tags=55%, list=20%, signal=68%
GO_NEGATIVE_REGULATION_OF_T_CELL_RECEPTOR_SIGNALING_PATHWAY	GO_NEGATIVE_REGULATION_OF_T_CELL_RECEPTOR_SIGNALING_PATHWAY		15	0.639341	1.46195	0.074856	0.202282	1	4966	tags=73%, list=29%, signal=103%
GO_ATP_GENERATION_FROM_ADP	GO_ATP_GENERATION_FROM_ADP		34	0.576895	1.52292	0.0684105	0.202283	1	4039	tags=56%, list=23%, signal=73%
GO_CELL_KILLING	GO_CELL_KILLING		46	0.585206	1.53278	0.0313653	0.202412	0.999	1710	tags=26%, list=10%, signal=29%
GO_LABYRINTHINE_LAYER_DEVELOPMENT	GO_LABYRINTHINE_LAYER_DEVELOPMENT		41	0.537015	1.52321	0.01341	0.202455	1	3698	tags=41%, list=21%, signal=53%
GO_RESPONSE_TO_TRANSITION_METAL_NANOPARTICLE	GO_RESPONSE_TO_TRANSITION_METAL_NANOPARTICLE		137	0.494511	1.46207	0.0135659	0.202459	1	2624	tags=34%, list=15%, signal=40%
GO_POSITIVE_REGULATION_OF_ALPHA_BETA_T_CELL_PROLIFERATION	GO_POSITIVE_REGULATION_OF_ALPHA_BETA_T_CELL_PROLIFERATION		19	0.682871	1.45707	0.0914286	0.202472	1	3756	tags=53%, list=22%, signal=67%
GO_NEGATIVE_REGULATION_OF_CELL_CELL_ADHESION	GO_NEGATIVE_REGULATION_OF_CELL_CELL_ADHESION		123	0.500898	1.52352	0.027668	0.202616	1	3095	tags=34%, list=18%, signal=41%
GO_PATTERNING_OF_BLOOD_VESSELS	GO_PATTERNING_OF_BLOOD_VESSELS		31	0.618323	1.5278	0.0298805	0.202668	1	3678	tags=42%, list=21%, signal=53%
GO_APOPTOTIC_CELL_CLEARANCE	GO_APOPTOTIC_CELL_CLEARANCE		27	0.627355	1.52973	0.0350195	0.202735	1	3244	tags=48%, list=19%, signal=59%
GO_REGULATION_OF_GRANULOCYTE_CHEMOTAXIS	GO_REGULATION_OF_GRANULOCYTE_CHEMOTAXIS		37	0.723507	1.52698	0.0217822	0.202901	1	959	tags=32%, list=6%, signal=34%
GO_NEGATIVE_REGULATION_OF_REACTIVE_OXYGEN_SPECIES_BIOSYNTHETIC_PROCESS	GO_NEGATIVE_REGULATION_OF_REACTIVE_OXYGEN_SPECIES_BIOSYNTHETIC_PROCESS		16	0.692306	1.52367	0.0194553	0.203033	1	3458	tags=56%, list=20%, signal=70%
GO_CELLULAR_RESPONSE_TO_VIRUS	GO_CELLULAR_RESPONSE_TO_VIRUS		21	0.681637	1.52521	0.0189394	0.203068	1	2564	tags=43%, list=15%, signal=50%
GO_POSITIVE_REGULATION_OF_VASCULATURE_DEVELOPMENT	GO_POSITIVE_REGULATION_OF_VASCULATURE_DEVELOPMENT		124	0.595248	1.53281	0.0117878	0.203101	0.999	1737	tags=31%, list=10%, signal=34%
GO_NEGATIVE_REGULATION_OF_TUMOR_NECROSIS_FACTOR_SUPERFAMILY_CYTOKINE_PRODUCTION	GO_NEGATIVE_REGULATION_OF_TUMOR_NECROSIS_FACTOR_SUPERFAMILY_CYTOKINE_PRODUCTION		39	0.646469	1.52789	0.0363985	0.203128	1	3815	tags=54%, list=22%, signal=69%
GO_VITAMIN_TRANSPORT	GO_VITAMIN_TRANSPORT		30	0.526354	1.52829	0.0321285	0.203162	1	3640	tags=37%, list=21%, signal=46%
GO_NEGATIVE_REGULATION_OF_LEUKOCYTE_DIFFERENTIATION	GO_NEGATIVE_REGULATION_OF_LEUKOCYTE_DIFFERENTIATION		76	0.551084	1.52585	0.0307102	0.20331	1	2885	tags=34%, list=17%, signal=41%
GO_PHOSPHATIDIC_ACID_METABOLIC_PROCESS	GO_PHOSPHATIDIC_ACID_METABOLIC_PROCESS		27	0.538952	1.53297	0.0304878	0.203538	0.999	2637	tags=26%, list=15%, signal=31%
GO_POSITIVE_REGULATION_OF_MULTI_ORGANISM_PROCESS	GO_POSITIVE_REGULATION_OF_MULTI_ORGANISM_PROCESS		141	0.421553	1.52534	0.0158103	0.203556	1	2785	tags=24%, list=16%, signal=29%
GO_NEGATIVE_REGULATION_OF_RESPONSE_TO_WOUNDING	GO_NEGATIVE_REGULATION_OF_RESPONSE_TO_WOUNDING		144	0.520543	1.5241	0.00984252	0.203578	1	3502	tags=36%, list=20%, signal=45%
GO_FOLIC_ACID_CONTAINING_COMPOUND_METABOLIC_PROCESS	GO_FOLIC_ACID_CONTAINING_COMPOUND_METABOLIC_PROCESS		25	0.615157	1.52373	0.0250965	0.203616	1	2080	tags=32%, list=12%, signal=36%
GO_HYALURONAN_METABOLIC_PROCESS	GO_HYALURONAN_METABOLIC_PROCESS		29	0.669202	1.52836	0.00763359	0.203726	1	3872	tags=62%, list=23%, signal=80%
GO_NATURAL_KILLER_CELL_ACTIVATION	GO_NATURAL_KILLER_CELL_ACTIVATION		47	0.527095	1.52596	0.0440613	0.203808	1	3476	tags=30%, list=20%, signal=37%
GO_NEGATIVE_REGULATION_OF_INTERLEUKIN_1_PRODUCTION	GO_NEGATIVE_REGULATION_OF_INTERLEUKIN_1_PRODUCTION		17	0.689823	1.5287	0.0381679	0.203851	1	3458	tags=47%, list=20%, signal=59%
GO_POSITIVE_REGULATION_OF_DEFENSE_RESPONSE	GO_POSITIVE_REGULATION_OF_DEFENSE_RESPONSE		337	0.547013	1.52426	0.0346154	0.203996	1	2615	tags=34%, list=15%, signal=39%
GO_MONOSACCHARIDE_METABOLIC_PROCESS	GO_MONOSACCHARIDE_METABOLIC_PROCESS		177	0.417447	1.533	0.0163934	0.204184	0.999	3059	tags=26%, list=18%, signal=31%
GO_POSITIVE_REGULATION_OF_SMOOTH_MUSCLE_CELL_MIGRATION	GO_POSITIVE_REGULATION_OF_SMOOTH_MUSCLE_CELL_MIGRATION		30	0.752809	1.53327	0.00193424	0.204427	0.999	1118	tags=43%, list=6%, signal=46%
GO_INTERFERON_GAMMA_MEDIATED_SIGNALING_PATHWAY	GO_INTERFERON_GAMMA_MEDIATED_SIGNALING_PATHWAY		62	0.716888	1.53365	0.0114723	0.204514	0.999	2887	tags=65%, list=17%, signal=77%
GO_REGULATION_OF_VASCULATURE_DEVELOPMENT	GO_REGULATION_OF_VASCULATURE_DEVELOPMENT		215	0.577029	1.53409	0.00976562	0.204568	0.999	1838	tags=30%, list=11%, signal=33%
GO_POSITIVE_REGULATION_OF_PROTEIN_AUTOPHOSPHORYLATION	GO_POSITIVE_REGULATION_OF_PROTEIN_AUTOPHOSPHORYLATION		21	0.628581	1.45513	0.0482625	0.204701	1	2301	tags=38%, list=13%, signal=44%
GO_POSITIVE_REGULATION_OF_ORGANELLE_ASSEMBLY	GO_POSITIVE_REGULATION_OF_ORGANELLE_ASSEMBLY		43	0.475718	1.45537	0.0502901	0.204715	1	1528	tags=16%, list=9%, signal=18%
GO_NEGATIVE_REGULATION_OF_B_CELL_ACTIVATION	GO_NEGATIVE_REGULATION_OF_B_CELL_ACTIVATION		30	0.617174	1.45418	0.0522388	0.204919	1	2981	tags=43%, list=17%, signal=52%
GO_RESPONSE_TO_HEAT	GO_RESPONSE_TO_HEAT		83	0.56702	1.53468	0.025641	0.204992	0.999	1690	tags=29%, list=10%, signal=32%
GO_REGULATION_OF_EPIDERMAL_GROWTH_FACTOR_ACTIVATED_RECEPTOR_ACTIVITY	GO_REGULATION_OF_EPIDERMAL_GROWTH_FACTOR_ACTIVATED_RECEPTOR_ACTIVITY		20	0.62057	1.53588	0.0205339	0.205098	0.999	594	tags=20%, list=3%, signal=21%
GO_KERATAN_SULFATE_BIOSYNTHETIC_PROCESS	GO_KERATAN_SULFATE_BIOSYNTHETIC_PROCESS		27	0.624256	1.45425	0.0517241	0.20523	1	3890	tags=44%, list=23%, signal=57%
GO_RESPONSE_TO_INTERLEUKIN_1	GO_RESPONSE_TO_INTERLEUKIN_1		104	0.557364	1.53411	0.0308285	0.205277	0.999	1782	tags=26%, list=10%, signal=29%
GO_NEGATIVE_REGULATION_OF_TYPE_I_INTERFERON_PRODUCTION	GO_NEGATIVE_REGULATION_OF_TYPE_I_INTERFERON_PRODUCTION		35	0.67649	1.53617	0.0152381	0.205374	0.999	2816	tags=43%, list=16%, signal=51%
GO_PROTEIN_O_LINKED_GLYCOSYLATION	GO_PROTEIN_O_LINKED_GLYCOSYLATION		84	0.426541	1.53487	0.0141129	0.205495	0.999	3890	tags=36%, list=23%, signal=46%
GO_LYTIC_VACUOLE_ORGANIZATION	GO_LYTIC_VACUOLE_ORGANIZATION		50	0.470963	1.45425	0.0546559	0.205618	1	2765	tags=34%, list=16%, signal=40%
GO_OXIDOREDUCTION_COENZYME_METABOLIC_PROCESS	GO_OXIDOREDUCTION_COENZYME_METABOLIC_PROCESS		93	0.417681	1.45081	0.0431211	0.205839	1	3059	tags=31%, list=18%, signal=38%
GO_AXON_REGENERATION	GO_AXON_REGENERATION		20	0.707229	1.5363	0.0140845	0.205859	0.999	1014	tags=35%, list=6%, signal=37%
GO_REGULATION_OF_PEPTIDYL_THREONINE_PHOSPHORYLATION	GO_REGULATION_OF_PEPTIDYL_THREONINE_PHOSPHORYLATION		35	0.540564	1.45315	0.0223577	0.20608	1	1737	tags=26%, list=10%, signal=29%
GO_REGULATION_OF_TYROSINE_PHOSPHORYLATION_OF_STAT3_PROTEIN	GO_REGULATION_OF_TYROSINE_PHOSPHORYLATION_OF_STAT3_PROTEIN		44	0.591444	1.53498	0.0154739	0.206091	0.999	2423	tags=34%, list=14%, signal=40%
GO_REACTIVE_OXYGEN_SPECIES_BIOSYNTHETIC_PROCESS	GO_REACTIVE_OXYGEN_SPECIES_BIOSYNTHETIC_PROCESS		23	0.634785	1.45113	0.0599251	0.206113	1	2047	tags=30%, list=12%, signal=34%
GO_POSITIVE_REGULATION_OF_STAT_CASCADE	GO_POSITIVE_REGULATION_OF_STAT_CASCADE		72	0.5176	1.45082	0.0390625	0.206203	1	3150	tags=32%, list=18%, signal=39%
GO_PROTEIN_ACTIVATION_CASCADE	GO_PROTEIN_ACTIVATION_CASCADE		73	0.680855	1.53649	0.0250482	0.206298	0.999	2239	tags=33%, list=13%, signal=38%
GO_REGULATION_OF_DNA_TEMPLATED_TRANSCRIPTION_IN_RESPONSE_TO_STRESS	GO_REGULATION_OF_DNA_TEMPLATED_TRANSCRIPTION_IN_RESPONSE_TO_STRESS		59	0.520161	1.45215	0.0442656	0.206427	1	1982	tags=31%, list=12%, signal=34%
GO_RESPONSE_TO_STARVATION	GO_RESPONSE_TO_STARVATION		140	0.416955	1.45115	0.0192678	0.206447	1	3122	tags=34%, list=18%, signal=41%
GO_RESPONSE_TO_AXON_INJURY	GO_RESPONSE_TO_AXON_INJURY		43	0.553771	1.45189	0.0349515	0.206481	1	2682	tags=33%, list=16%, signal=38%
GO_POSITIVE_REGULATION_OF_LOCOMOTION	GO_POSITIVE_REGULATION_OF_LOCOMOTION		383	0.503446	1.45136	0.0198807	0.206553	1	3458	tags=39%, list=20%, signal=48%
GO_PORPHYRIN_CONTAINING_COMPOUND_METABOLIC_PROCESS	GO_PORPHYRIN_CONTAINING_COMPOUND_METABOLIC_PROCESS		33	0.433546	1.45151	0.0670732	0.20671	1	2974	tags=24%, list=17%, signal=29%
GO_POSITIVE_REGULATION_OF_CELL_CELL_ADHESION	GO_POSITIVE_REGULATION_OF_CELL_CELL_ADHESION		223	0.516889	1.45218	0.0673077	0.206779	1	3086	tags=39%, list=18%, signal=46%
GO_ANTIMICROBIAL_HUMORAL_RESPONSE	GO_ANTIMICROBIAL_HUMORAL_RESPONSE		37	0.603012	1.44935	0.055666	0.206858	1	2574	tags=27%, list=15%, signal=32%
GO_NEGATIVE_REGULATION_OF_LEUKOCYTE_MEDIATED_IMMUNITY	GO_NEGATIVE_REGULATION_OF_LEUKOCYTE_MEDIATED_IMMUNITY		44	0.56863	1.44613	0.0786948	0.206921	1	2816	tags=43%, list=16%, signal=52%
GO_CELLULAR_TRANSITION_METAL_ION_HOMEOSTASIS	GO_CELLULAR_TRANSITION_METAL_ION_HOMEOSTASIS		71	0.558005	1.53657	0.013834	0.206943	0.999	3372	tags=41%, list=20%, signal=51%
GO_RESPONSE_TO_HYDROGEN_PEROXIDE	GO_RESPONSE_TO_HYDROGEN_PEROXIDE		105	0.527037	1.45232	0.0280374	0.206964	1	2204	tags=31%, list=13%, signal=36%
GO_BONE_REMODELING	GO_BONE_REMODELING		34	0.585091	1.44627	0.046332	0.207061	1	3479	tags=41%, list=20%, signal=52%
GO_POSITIVE_REGULATION_OF_T_HELPER_1_TYPE_IMMUNE_RESPONSE	GO_POSITIVE_REGULATION_OF_T_HELPER_1_TYPE_IMMUNE_RESPONSE		15	0.631198	1.44892	0.071291	0.207187	1	1034	tags=13%, list=6%, signal=14%
GO_POLYSACCHARIDE_METABOLIC_PROCESS	GO_POLYSACCHARIDE_METABOLIC_PROCESS		73	0.454867	1.44694	0.0342205	0.207189	1	4290	tags=44%, list=25%, signal=58%
GO_REGULATION_OF_LIPOPOLYSACCHARIDE_MEDIATED_SIGNALING_PATHWAY	GO_REGULATION_OF_LIPOPOLYSACCHARIDE_MEDIATED_SIGNALING_PATHWAY		16	0.728322	1.44665	0.045977	0.207218	1	2400	tags=63%, list=14%, signal=73%
GO_REGULATION_OF_INTERLEUKIN_6_BIOSYNTHETIC_PROCESS	GO_REGULATION_OF_INTERLEUKIN_6_BIOSYNTHETIC_PROCESS		16	0.702314	1.44935	0.0666667	0.207235	1	2383	tags=44%, list=14%, signal=51%
GO_POSITIVE_REGULATION_OF_REACTIVE_OXYGEN_SPECIES_METABOLIC_PROCESS	GO_POSITIVE_REGULATION_OF_REACTIVE_OXYGEN_SPECIES_METABOLIC_PROCESS		84	0.555876	1.4476	0.0503876	0.207274	1	2167	tags=35%, list=13%, signal=39%
GO_POSITIVE_REGULATION_OF_SMOOTH_MUSCLE_CONTRACTION	GO_POSITIVE_REGULATION_OF_SMOOTH_MUSCLE_CONTRACTION		28	0.621377	1.44638	0.0589391	0.2073	1	1073	tags=25%, list=6%, signal=27%
GO_HYPEROSMOTIC_RESPONSE	GO_HYPEROSMOTIC_RESPONSE		19	0.621894	1.44709	0.0381679	0.207334	1	1055	tags=21%, list=6%, signal=22%
GO_MEMBRANE_RAFT_ORGANIZATION	GO_MEMBRANE_RAFT_ORGANIZATION		17	0.773077	1.44731	0.0381679	0.207393	1	3095	tags=76%, list=18%, signal=93%
GO_IMMUNOGLOBULIN_PRODUCTION	GO_IMMUNOGLOBULIN_PRODUCTION		40	0.569742	1.53675	0.0262172	0.20743	0.999	2846	tags=25%, list=17%, signal=30%
GO_BRANCH_ELONGATION_OF_AN_EPITHELIUM	GO_BRANCH_ELONGATION_OF_AN_EPITHELIUM		16	0.786855	1.44551	0.0377359	0.207523	1	1737	tags=56%, list=10%, signal=63%
GO_SMALL_MOLECULE_BIOSYNTHETIC_PROCESS	GO_SMALL_MOLECULE_BIOSYNTHETIC_PROCESS		397	0.403899	1.44843	0.0180361	0.207535	1	3076	tags=28%, list=18%, signal=34%
GO_REGULATION_OF_CELL_SHAPE	GO_REGULATION_OF_CELL_SHAPE		128	0.513803	1.44937	0.0221774	0.207595	1	1821	tags=27%, list=11%, signal=29%
GO_POSITIVE_REGULATION_OF_PEPTIDYL_THREONINE_PHOSPHORYLATION	GO_POSITIVE_REGULATION_OF_PEPTIDYL_THREONINE_PHOSPHORYLATION		24	0.579083	1.44764	0.0284091	0.207596	1	1737	tags=25%, list=10%, signal=28%
GO_POSITIVE_REGULATION_OF_MONOCYTE_CHEMOTAXIS	GO_POSITIVE_REGULATION_OF_MONOCYTE_CHEMOTAXIS		15	0.802278	1.44785	0.0309478	0.207653	1	1302	tags=47%, list=8%, signal=50%
GO_PROTEIN_LIPID_COMPLEX_ASSEMBLY	GO_PROTEIN_LIPID_COMPLEX_ASSEMBLY		19	0.526069	1.448	0.0871287	0.207852	1	1704	tags=21%, list=10%, signal=23%
GO_POSITIVE_REGULATION_OF_ALPHA_BETA_T_CELL_DIFFERENTIATION	GO_POSITIVE_REGULATION_OF_ALPHA_BETA_T_CELL_DIFFERENTIATION		36	0.595325	1.44455	0.0858779	0.207881	1	1980	tags=36%, list=12%, signal=41%
GO_ORGANIC_CATION_TRANSPORT	GO_ORGANIC_CATION_TRANSPORT		19	0.594454	1.53685	0.0318725	0.208038	0.999	1480	tags=16%, list=9%, signal=17%
GO_UNSATURATED_FATTY_ACID_BIOSYNTHETIC_PROCESS	GO_UNSATURATED_FATTY_ACID_BIOSYNTHETIC_PROCESS		50	0.573987	1.44458	0.0557769	0.208202	1	2294	tags=32%, list=13%, signal=37%
GO_REGULATION_OF_CELL_ACTIVATION	GO_REGULATION_OF_CELL_ACTIVATION		435	0.51485	1.53715	0.0290135	0.208208	0.999	3969	tags=42%, list=23%, signal=53%
GO_POSITIVE_REGULATION_OF_LIPID_CATABOLIC_PROCESS	GO_POSITIVE_REGULATION_OF_LIPID_CATABOLIC_PROCESS		25	0.558303	1.44478	0.0760234	0.208247	1	2900	tags=32%, list=17%, signal=38%
GO_DENDRITIC_CELL_CHEMOTAXIS	GO_DENDRITIC_CELL_CHEMOTAXIS		16	0.731077	1.44336	0.0572519	0.20845	1	1302	tags=38%, list=8%, signal=41%
GO_CELLULAR_RESPONSE_TO_ABIOTIC_STIMULUS	GO_CELLULAR_RESPONSE_TO_ABIOTIC_STIMULUS		243	0.44099	1.44381	0.0115607	0.208526	1	2602	tags=29%, list=15%, signal=34%
GO_TOLL_LIKE_RECEPTOR_4_SIGNALING_PATHWAY	GO_TOLL_LIKE_RECEPTOR_4_SIGNALING_PATHWAY		18	0.731865	1.4435	0.0652591	0.208613	1	1559	tags=44%, list=9%, signal=49%
GO_PYRUVATE_METABOLIC_PROCESS	GO_PYRUVATE_METABOLIC_PROCESS		59	0.480784	1.44291	0.0688259	0.208759	1	4506	tags=44%, list=26%, signal=60%
GO_REGULATION_OF_EPITHELIAL_CELL_MIGRATION	GO_REGULATION_OF_EPITHELIAL_CELL_MIGRATION		160	0.478682	1.44263	0.027451	0.208818	1	2476	tags=28%, list=14%, signal=33%
GO_REGULATION_OF_ACTIVATED_T_CELL_PROLIFERATION	GO_REGULATION_OF_ACTIVATED_T_CELL_PROLIFERATION		39	0.581623	1.53719	0.0314961	0.208945	0.999	3905	tags=41%, list=23%, signal=53%
GO_MONOCYTE_CHEMOTAXIS	GO_MONOCYTE_CHEMOTAXIS		34	0.664117	1.44026	0.0895238	0.20909	1	1554	tags=21%, list=9%, signal=23%
GO_DETECTION_OF_OTHER_ORGANISM	GO_DETECTION_OF_OTHER_ORGANISM		16	0.710597	1.44071	0.105364	0.209107	1	4264	tags=69%, list=25%, signal=91%
GO_RESPONSE_TO_MERCURY_ION	GO_RESPONSE_TO_MERCURY_ION		15	0.669358	1.44046	0.0675676	0.209132	1	1873	tags=33%, list=11%, signal=37%
GO_LEUKOCYTE_PROLIFERATION	GO_LEUKOCYTE_PROLIFERATION		81	0.503758	1.44095	0.0757282	0.209137	1	3002	tags=37%, list=17%, signal=45%
GO_POSITIVE_REGULATION_OF_ENDOCYTOSIS	GO_POSITIVE_REGULATION_OF_ENDOCYTOSIS		111	0.528142	1.43996	0.0473373	0.209161	1	2456	tags=34%, list=14%, signal=40%
GO_MAMMARY_GLAND_DEVELOPMENT	GO_MAMMARY_GLAND_DEVELOPMENT		108	0.455008	1.44187	0.0308642	0.209186	1	3365	tags=31%, list=20%, signal=39%
GO_CELLULAR_RESPONSE_TO_LIPID	GO_CELLULAR_RESPONSE_TO_LIPID		425	0.419525	1.4397	0.00583658	0.209203	1	2231	tags=22%, list=13%, signal=25%
GO_REGULATION_OF_RENAL_SYSTEM_PROCESS	GO_REGULATION_OF_RENAL_SYSTEM_PROCESS		37	0.574138	1.53742	0.0229446	0.209378	0.999	2387	tags=27%, list=14%, signal=31%
GO_REGULATION_OF_INTERLEUKIN_8_SECRETION	GO_REGULATION_OF_INTERLEUKIN_8_SECRETION		18	0.754019	1.44149	0.0208729	0.209388	1	1737	tags=44%, list=10%, signal=49%
GO_CELLULAR_RESPONSE_TO_TOPOLOGICALLY_INCORRECT_PROTEIN	GO_CELLULAR_RESPONSE_TO_TOPOLOGICALLY_INCORRECT_PROTEIN		108	0.419305	1.44196	0.0536398	0.209401	1	3360	tags=36%, list=20%, signal=45%
GO_ONE_CARBON_METABOLIC_PROCESS	GO_ONE_CARBON_METABOLIC_PROCESS		33	0.521674	1.441	0.0665362	0.20941	1	2302	tags=24%, list=13%, signal=28%
GO_MUCOPOLYSACCHARIDE_METABOLIC_PROCESS	GO_MUCOPOLYSACCHARIDE_METABOLIC_PROCESS		104	0.518049	1.44116	0.0153846	0.20952	1	3890	tags=51%, list=23%, signal=65%
GO_NEGATIVE_REGULATION_OF_RECEPTOR_ACTIVITY	GO_NEGATIVE_REGULATION_OF_RECEPTOR_ACTIVITY		28	0.545401	1.53948	0.0357853	0.209647	0.999	3078	tags=32%, list=18%, signal=39%
GO_B_CELL_MEDIATED_IMMUNITY	GO_B_CELL_MEDIATED_IMMUNITY		71	0.727665	1.53998	0.00978474	0.209705	0.999	1556	tags=38%, list=9%, signal=42%
GO_NEGATIVE_REGULATION_OF_CHONDROCYTE_DIFFERENTIATION	GO_NEGATIVE_REGULATION_OF_CHONDROCYTE_DIFFERENTIATION		16	0.673304	1.53753	0.0119284	0.209889	0.999	3352	tags=44%, list=19%, signal=54%
GO_REGULATION_OF_TYROSINE_PHOSPHORYLATION_OF_STAT1_PROTEIN	GO_REGULATION_OF_TYROSINE_PHOSPHORYLATION_OF_STAT1_PROTEIN		16	0.621021	1.5378	0.0153846	0.210112	0.999	2602	tags=38%, list=15%, signal=44%
GO_REGULATION_OF_ERK1_AND_ERK2_CASCADE	GO_REGULATION_OF_ERK1_AND_ERK2_CASCADE		216	0.543582	1.5401	0.00388349	0.210235	0.999	2387	tags=31%, list=14%, signal=36%
GO_ERYTHROCYTE_HOMEOSTASIS	GO_ERYTHROCYTE_HOMEOSTASIS		67	0.460721	1.54028	0.0158416	0.210756	0.999	2733	tags=31%, list=16%, signal=37%
GO_ADP_METABOLIC_PROCESS	GO_ADP_METABOLIC_PROCESS		41	0.565916	1.54417	0.0561122	0.210803	0.999	4039	tags=54%, list=23%, signal=70%
GO_MONOSACCHARIDE_BIOSYNTHETIC_PROCESS	GO_MONOSACCHARIDE_BIOSYNTHETIC_PROCESS		50	0.502036	1.53781	0.0254237	0.210914	0.999	3059	tags=32%, list=18%, signal=39%
GO_REGULATION_OF_BODY_FLUID_LEVELS	GO_REGULATION_OF_BODY_FLUID_LEVELS		458	0.471374	1.54135	0.00580271	0.210985	0.999	2387	tags=24%, list=14%, signal=27%
GO_NEGATIVE_REGULATION_OF_VASCULATURE_DEVELOPMENT	GO_NEGATIVE_REGULATION_OF_VASCULATURE_DEVELOPMENT		73	0.559281	1.43717	0.0332031	0.211268	1	1993	tags=27%, list=12%, signal=31%
GO_POSITIVE_REGULATION_OF_CELL_ADHESION_MEDIATED_BY_INTEGRIN	GO_POSITIVE_REGULATION_OF_CELL_ADHESION_MEDIATED_BY_INTEGRIN		17	0.767972	1.54041	0.00956023	0.211279	0.999	1449	tags=47%, list=8%, signal=51%
GO_POSITIVE_REGULATION_OF_EXTRINSIC_APOPTOTIC_SIGNALING_PATHWAY	GO_POSITIVE_REGULATION_OF_EXTRINSIC_APOPTOTIC_SIGNALING_PATHWAY		51	0.634941	1.53801	0.0176817	0.211404	0.999	2921	tags=49%, list=17%, signal=59%
GO_LONG_CHAIN_FATTY_ACID_TRANSPORT	GO_LONG_CHAIN_FATTY_ACID_TRANSPORT		41	0.604296	1.54075	0.0157171	0.211424	0.999	2976	tags=44%, list=17%, signal=53%
GO_REGULATION_OF_MACROPHAGE_DIFFERENTIATION	GO_REGULATION_OF_MACROPHAGE_DIFFERENTIATION		20	0.667987	1.54474	0.0153846	0.211424	0.999	2744	tags=45%, list=16%, signal=53%
GO_CELLULAR_RESPONSE_TO_GLUCOSE_STARVATION	GO_CELLULAR_RESPONSE_TO_GLUCOSE_STARVATION		29	0.632506	1.54515	0.023166	0.211531	0.999	3354	tags=48%, list=19%, signal=60%
GO_NEGATIVE_REGULATION_OF_IMMUNE_SYSTEM_PROCESS	GO_NEGATIVE_REGULATION_OF_IMMUNE_SYSTEM_PROCESS		329	0.518885	1.54424	0.015444	0.211544	0.999	2905	tags=36%, list=17%, signal=42%
GO_REGULATION_OF_ADAPTIVE_IMMUNE_RESPONSE	GO_REGULATION_OF_ADAPTIVE_IMMUNE_RESPONSE		116	0.487603	1.4372	0.0971429	0.211587	1	3026	tags=33%, list=18%, signal=39%
GO_REGULATION_OF_PLASMA_LIPOPROTEIN_PARTICLE_LEVELS	GO_REGULATION_OF_PLASMA_LIPOPROTEIN_PARTICLE_LEVELS		44	0.580637	1.43791	0.0342742	0.211604	1	1704	tags=30%, list=10%, signal=33%
GO_POSITIVE_REGULATION_OF_MYELOID_LEUKOCYTE_DIFFERENTIATION	GO_POSITIVE_REGULATION_OF_MYELOID_LEUKOCYTE_DIFFERENTIATION		47	0.572768	1.54987	0.0206379	0.211642	0.999	3905	tags=40%, list=23%, signal=52%
GO_REGULATION_OF_MULTI_ORGANISM_PROCESS	GO_REGULATION_OF_MULTI_ORGANISM_PROCESS		414	0.437474	1.54136	0.00961539	0.211818	0.999	3175	tags=29%, list=18%, signal=35%
GO_REGULATION_OF_BLOOD_VESSEL_ENDOTHELIAL_CELL_MIGRATION	GO_REGULATION_OF_BLOOD_VESSEL_ENDOTHELIAL_CELL_MIGRATION		49	0.616779	1.54544	0.0281125	0.211827	0.999	1457	tags=29%, list=8%, signal=31%
GO_REGULATION_OF_B_CELL_ACTIVATION	GO_REGULATION_OF_B_CELL_ACTIVATION		105	0.609014	1.55024	0.0291829	0.211849	0.999	3041	tags=38%, list=18%, signal=46%
GO_REGULATION_OF_LIPOPROTEIN_LIPASE_ACTIVITY	GO_REGULATION_OF_LIPOPROTEIN_LIPASE_ACTIVITY		15	0.65922	1.54175	0.0427699	0.211922	0.999	2616	tags=40%, list=15%, signal=47%
GO_LIPOPOLYSACCHARIDE_MEDIATED_SIGNALING_PATHWAY	GO_LIPOPOLYSACCHARIDE_MEDIATED_SIGNALING_PATHWAY		30	0.718608	1.43722	0.0647059	0.211936	1	2202	tags=47%, list=13%, signal=53%
GO_REGULATION_OF_MAST_CELL_ACTIVATION_INVOLVED_IN_IMMUNE_RESPONSE	GO_REGULATION_OF_MAST_CELL_ACTIVATION_INVOLVED_IN_IMMUNE_RESPONSE		30	0.713588	1.54219	0.0288462	0.211987	0.999	2670	tags=57%, list=16%, signal=67%
GO_AMINE_METABOLIC_PROCESS	GO_AMINE_METABOLIC_PROCESS		115	0.41988	1.43645	0.0335968	0.211997	1	3926	tags=35%, list=23%, signal=45%
GO_REGULATION_OF_IMMUNOGLOBULIN_SECRETION	GO_REGULATION_OF_IMMUNOGLOBULIN_SECRETION		17	0.608568	1.43729	0.101145	0.212194	1	4593	tags=59%, list=27%, signal=80%
GO_NEGATIVE_REGULATION_OF_LYMPHOCYTE_DIFFERENTIATION	GO_NEGATIVE_REGULATION_OF_LYMPHOCYTE_DIFFERENTIATION		36	0.553096	1.55054	0.0249042	0.2123	0.999	2733	tags=28%, list=16%, signal=33%
GO_ANTIGEN_PROCESSING_AND_PRESENTATION_OF_EXOGENOUS_PEPTIDE_ANTIGEN_VIA_MHC_CLASS_I	GO_ANTIGEN_PROCESSING_AND_PRESENTATION_OF_EXOGENOUS_PEPTIDE_ANTIGEN_VIA_MHC_CLASS_I		60	0.636046	1.54567	0.0414201	0.212308	0.999	3533	tags=45%, list=21%, signal=56%
GO_INTERACTION_WITH_SYMBIONT	GO_INTERACTION_WITH_SYMBIONT		50	0.557483	1.54621	0.0121212	0.212312	0.999	2480	tags=28%, list=14%, signal=33%
GO_ANGIOGENESIS	GO_ANGIOGENESIS		269	0.506651	1.43602	0.0413386	0.212341	1	2424	tags=32%, list=14%, signal=37%
GO_ENDOPLASMIC_RETICULUM_CALCIUM_ION_HOMEOSTASIS	GO_ENDOPLASMIC_RETICULUM_CALCIUM_ION_HOMEOSTASIS		20	0.484858	1.43339	0.105691	0.212381	1	4583	tags=50%, list=27%, signal=68%
GO_POSITIVE_REGULATION_OF_PRODUCTION_OF_MOLECULAR_MEDIATOR_OF_IMMUNE_RESPONSE	GO_POSITIVE_REGULATION_OF_PRODUCTION_OF_MOLECULAR_MEDIATOR_OF_IMMUNE_RESPONSE		59	0.586695	1.54901	0.0211946	0.212508	0.999	3041	tags=41%, list=18%, signal=49%
GO_REGULATION_OF_INNATE_IMMUNE_RESPONSE	GO_REGULATION_OF_INNATE_IMMUNE_RESPONSE		328	0.52219	1.55082	0.0350195	0.21263	0.999	2655	tags=33%, list=15%, signal=38%
GO_POSITIVE_REGULATION_OF_MYELOID_LEUKOCYTE_MEDIATED_IMMUNITY	GO_POSITIVE_REGULATION_OF_MYELOID_LEUKOCYTE_MEDIATED_IMMUNITY		17	0.783239	1.54229	0.0175439	0.212666	0.999	2294	tags=59%, list=13%, signal=68%
GO_RESPONSE_TO_ALCOHOL	GO_RESPONSE_TO_ALCOHOL		349	0.439711	1.43342	0.00959693	0.212688	1	2202	tags=24%, list=13%, signal=27%
GO_ORGAN_REGENERATION	GO_ORGAN_REGENERATION		81	0.588267	1.54691	0.00764818	0.212752	0.999	2387	tags=33%, list=14%, signal=39%
GO_POSITIVE_REGULATION_OF_TYROSINE_PHOSPHORYLATION_OF_STAT3_PROTEIN	GO_POSITIVE_REGULATION_OF_TYROSINE_PHOSPHORYLATION_OF_STAT3_PROTEIN		37	0.583051	1.4335	0.0421456	0.212916	1	3092	tags=41%, list=18%, signal=49%
GO_RESPONSE_TO_TYPE_I_INTERFERON	GO_RESPONSE_TO_TYPE_I_INTERFERON		62	0.724848	1.54631	0.0410448	0.21298	0.999	3256	tags=58%, list=19%, signal=71%
GO_REGULATION_OF_CD4_POSITIVE_ALPHA_BETA_T_CELL_ACTIVATION	GO_REGULATION_OF_CD4_POSITIVE_ALPHA_BETA_T_CELL_ACTIVATION		37	0.554869	1.43526	0.0907407	0.213079	1	1980	tags=27%, list=12%, signal=30%
GO_NEGATIVE_REGULATION_OF_CELL_ADHESION	GO_NEGATIVE_REGULATION_OF_CELL_ADHESION		203	0.474473	1.43363	0.0335306	0.213085	1	2383	tags=30%, list=14%, signal=34%
GO_BLOOD_COAGULATION_INTRINSIC_PATHWAY	GO_BLOOD_COAGULATION_INTRINSIC_PATHWAY		17	0.57433	1.54238	0.0534351	0.21334	0.999	4177	tags=29%, list=24%, signal=39%
GO_NEGATIVE_REGULATION_OF_SMALL_GTPASE_MEDIATED_SIGNAL_TRANSDUCTION	GO_NEGATIVE_REGULATION_OF_SMALL_GTPASE_MEDIATED_SIGNAL_TRANSDUCTION		38	0.49338	1.43364	0.0442656	0.213428	1	1214	tags=18%, list=7%, signal=20%
GO_REGULATION_OF_INFLAMMATORY_RESPONSE	GO_REGULATION_OF_INFLAMMATORY_RESPONSE		268	0.571899	1.55087	0.0156556	0.213485	0.999	2342	tags=30%, list=14%, signal=34%
GO_CELLULAR_RESPONSE_TO_STARVATION	GO_CELLULAR_RESPONSE_TO_STARVATION		106	0.433907	1.43247	0.0299625	0.213516	1	3084	tags=36%, list=18%, signal=43%
GO_VASCULATURE_DEVELOPMENT	GO_VASCULATURE_DEVELOPMENT		438	0.496919	1.4315	0.0337302	0.213546	1	2424	tags=31%, list=14%, signal=35%
GO_POLYSACCHARIDE_CATABOLIC_PROCESS	GO_POLYSACCHARIDE_CATABOLIC_PROCESS		24	0.592605	1.43125	0.0566406	0.213589	1	3059	tags=42%, list=18%, signal=51%
GO_REGULATION_OF_EXTRINSIC_APOPTOTIC_SIGNALING_PATHWAY_IN_ABSENCE_OF_LIGAND	GO_REGULATION_OF_EXTRINSIC_APOPTOTIC_SIGNALING_PATHWAY_IN_ABSENCE_OF_LIGAND		45	0.54938	1.43171	0.037037	0.213605	1	3193	tags=40%, list=19%, signal=49%
GO_NEGATIVE_REGULATION_OF_CYTOKINE_PRODUCTION_INVOLVED_IN_IMMUNE_RESPONSE	GO_NEGATIVE_REGULATION_OF_CYTOKINE_PRODUCTION_INVOLVED_IN_IMMUNE_RESPONSE		21	0.723235	1.54692	0.0191571	0.213615	0.999	2905	tags=48%, list=17%, signal=57%
GO_ISOTYPE_SWITCHING	GO_ISOTYPE_SWITCHING		15	0.552658	1.43375	0.0871985	0.213646	1	2846	tags=20%, list=17%, signal=24%
GO_RESPONSE_TO_DRUG	GO_RESPONSE_TO_DRUG		414	0.418407	1.4342	0.00968992	0.213654	1	2403	tags=24%, list=14%, signal=28%
GO_REGULATION_OF_CELLULAR_AMINE_METABOLIC_PROCESS	GO_REGULATION_OF_CELLULAR_AMINE_METABOLIC_PROCESS		84	0.448514	1.54745	0.0333333	0.213698	0.999	2970	tags=25%, list=17%, signal=30%
GO_REGULATION_OF_LIPASE_ACTIVITY	GO_REGULATION_OF_LIPASE_ACTIVITY		80	0.521806	1.43394	0.0441767	0.21371	1	3646	tags=45%, list=21%, signal=57%
GO_CELL_ACTIVATION_INVOLVED_IN_IMMUNE_RESPONSE	GO_CELL_ACTIVATION_INVOLVED_IN_IMMUNE_RESPONSE		130	0.552316	1.54784	0.026465	0.213756	0.999	3112	tags=37%, list=18%, signal=45%
GO_SIGNAL_PEPTIDE_PROCESSING	GO_SIGNAL_PEPTIDE_PROCESSING		22	0.521663	1.43459	0.0932039	0.213846	1	4683	tags=55%, list=27%, signal=75%
GO_RESPONSE_TO_TEMPERATURE_STIMULUS	GO_RESPONSE_TO_TEMPERATURE_STIMULUS		137	0.497647	1.43427	0.0252427	0.213912	1	2264	tags=31%, list=13%, signal=35%
GO_REGULATION_OF_TOLERANCE_INDUCTION	GO_REGULATION_OF_TOLERANCE_INDUCTION		17	0.664444	1.43172	0.0740038	0.213948	1	2905	tags=59%, list=17%, signal=71%
GO_HYDROGEN_PEROXIDE_METABOLIC_PROCESS	GO_HYDROGEN_PEROXIDE_METABOLIC_PROCESS		27	0.585219	1.5511	0.0366089	0.21399	0.999	2884	tags=26%, list=17%, signal=31%
GO_NEGATIVE_REGULATION_OF_TOLL_LIKE_RECEPTOR_SIGNALING_PATHWAY	GO_NEGATIVE_REGULATION_OF_TOLL_LIKE_RECEPTOR_SIGNALING_PATHWAY		25	0.623606	1.43183	0.0801527	0.214152	1	1663	tags=32%, list=10%, signal=35%
GO_DENDRITIC_CELL_DIFFERENTIATION	GO_DENDRITIC_CELL_DIFFERENTIATION		32	0.595568	1.42976	0.0878906	0.214469	1	2846	tags=50%, list=17%, signal=60%
GO_NEGATIVE_REGULATION_OF_CHEMOKINE_PRODUCTION	GO_NEGATIVE_REGULATION_OF_CHEMOKINE_PRODUCTION		15	0.717617	1.55129	0.0227704	0.21458	0.999	2707	tags=53%, list=16%, signal=63%
GO_POSITIVE_REGULATION_OF_EPITHELIAL_CELL_MIGRATION	GO_POSITIVE_REGULATION_OF_EPITHELIAL_CELL_MIGRATION		99	0.498298	1.42946	0.0416667	0.214602	1	1737	tags=25%, list=10%, signal=28%
GO_MYELOID_LEUKOCYTE_DIFFERENTIATION	GO_MYELOID_LEUKOCYTE_DIFFERENTIATION		93	0.49987	1.43025	0.0381679	0.214764	1	2199	tags=34%, list=13%, signal=39%
GO_POSITIVE_REGULATION_OF_INTERLEUKIN_6_PRODUCTION	GO_POSITIVE_REGULATION_OF_INTERLEUKIN_6_PRODUCTION		64	0.610896	1.42978	0.0758755	0.214791	1	3842	tags=56%, list=22%, signal=72%
GO_NEGATIVE_REGULATION_OF_SMOOTH_MUSCLE_CELL_MIGRATION	GO_NEGATIVE_REGULATION_OF_SMOOTH_MUSCLE_CELL_MIGRATION		16	0.698856	1.42835	0.0457256	0.214887	1	2485	tags=56%, list=14%, signal=66%
GO_MEMBRANE_LIPID_CATABOLIC_PROCESS	GO_MEMBRANE_LIPID_CATABOLIC_PROCESS		21	0.555523	1.42986	0.0644531	0.215021	1	2808	tags=48%, list=16%, signal=57%
GO_RESPONSE_TO_THYROID_HORMONE	GO_RESPONSE_TO_THYROID_HORMONE		19	0.596338	1.42888	0.0655106	0.215076	1	2177	tags=42%, list=13%, signal=48%
GO_AMINE_BIOSYNTHETIC_PROCESS	GO_AMINE_BIOSYNTHETIC_PROCESS		17	0.435215	1.42747	0.0821918	0.215136	1	4600	tags=47%, list=27%, signal=64%
GO_ENDOPLASMIC_RETICULUM_TO_CYTOSOL_TRANSPORT	GO_ENDOPLASMIC_RETICULUM_TO_CYTOSOL_TRANSPORT		20	0.514715	1.42792	0.0742972	0.215176	1	5780	tags=75%, list=34%, signal=113%
GO_EPITHELIAL_CELL_MORPHOGENESIS	GO_EPITHELIAL_CELL_MORPHOGENESIS		41	0.522388	1.42838	0.0306748	0.215178	1	2301	tags=32%, list=13%, signal=37%
GO_REGULATION_OF_CELL_MIGRATION_INVOLVED_IN_SPROUTING_ANGIOGENESIS	GO_REGULATION_OF_CELL_MIGRATION_INVOLVED_IN_SPROUTING_ANGIOGENESIS		19	0.650428	1.42767	0.0495049	0.2152	1	1449	tags=32%, list=8%, signal=34%
GO_CELLULAR_CARBOHYDRATE_METABOLIC_PROCESS	GO_CELLULAR_CARBOHYDRATE_METABOLIC_PROCESS		131	0.378489	1.42856	0.0351562	0.215285	1	3798	tags=31%, list=22%, signal=39%
GO_DEFENSE_RESPONSE_TO_BACTERIUM	GO_DEFENSE_RESPONSE_TO_BACTERIUM		177	0.583835	1.55131	0.0268199	0.215529	0.999	1445	tags=22%, list=8%, signal=24%
GO_POSITIVE_REGULATION_OF_PHAGOCYTOSIS	GO_POSITIVE_REGULATION_OF_PHAGOCYTOSIS		44	0.648136	1.4268	0.0537849	0.215783	1	2456	tags=48%, list=14%, signal=56%
GO_LEUKOTRIENE_BIOSYNTHETIC_PROCESS	GO_LEUKOTRIENE_BIOSYNTHETIC_PROCESS		17	0.753867	1.55164	0.0254403	0.215933	0.999	2294	tags=47%, list=13%, signal=54%
GO_POSITIVE_REGULATION_OF_TYPE_I_INTERFERON_PRODUCTION	GO_POSITIVE_REGULATION_OF_TYPE_I_INTERFERON_PRODUCTION		64	0.52736	1.426	0.0885827	0.216273	1	2785	tags=36%, list=16%, signal=43%
GO_MYD88_DEPENDENT_TOLL_LIKE_RECEPTOR_SIGNALING_PATHWAY	GO_MYD88_DEPENDENT_TOLL_LIKE_RECEPTOR_SIGNALING_PATHWAY		30	0.69087	1.42617	0.0833333	0.216337	1	2007	tags=43%, list=12%, signal=49%
GO_CARTILAGE_DEVELOPMENT_INVOLVED_IN_ENDOCHONDRAL_BONE_MORPHOGENESIS	GO_CARTILAGE_DEVELOPMENT_INVOLVED_IN_ENDOCHONDRAL_BONE_MORPHOGENESIS		19	0.664271	1.42493	0.0580271	0.216517	1	3352	tags=42%, list=19%, signal=52%
GO_REGULATION_OF_REPRODUCTIVE_PROCESS	GO_REGULATION_OF_REPRODUCTIVE_PROCESS		119	0.438431	1.42534	0.0263692	0.216562	1	2339	tags=24%, list=14%, signal=28%
GO_CELL_JUNCTION_ASSEMBLY	GO_CELL_JUNCTION_ASSEMBLY		122	0.445703	1.42549	0.0455446	0.216703	1	3095	tags=31%, list=18%, signal=38%
GO_POSITIVE_REGULATION_OF_REACTIVE_OXYGEN_SPECIES_BIOSYNTHETIC_PROCESS	GO_POSITIVE_REGULATION_OF_REACTIVE_OXYGEN_SPECIES_BIOSYNTHETIC_PROCESS		47	0.575307	1.42504	0.0669216	0.216705	1	2167	tags=34%, list=13%, signal=39%
GO_POSITIVE_REGULATION_OF_LEUKOCYTE_MEDIATED_IMMUNITY	GO_POSITIVE_REGULATION_OF_LEUKOCYTE_MEDIATED_IMMUNITY		78	0.493845	1.42431	0.0788955	0.216787	1	2602	tags=31%, list=15%, signal=36%
GO_CELLULAR_RESPONSE_TO_VITAMIN	GO_CELLULAR_RESPONSE_TO_VITAMIN		26	0.694802	1.42403	0.0428016	0.216846	1	2847	tags=58%, list=17%, signal=69%
GO_GLUCOSE_METABOLIC_PROCESS	GO_GLUCOSE_METABOLIC_PROCESS		111	0.449189	1.55165	0.0121212	0.216887	0.999	3059	tags=29%, list=18%, signal=35%
GO_POSITIVE_REGULATION_OF_NF_KAPPAB_IMPORT_INTO_NUCLEUS	GO_POSITIVE_REGULATION_OF_NF_KAPPAB_IMPORT_INTO_NUCLEUS		25	0.689761	1.42442	0.0839844	0.216995	1	2550	tags=44%, list=15%, signal=52%
GO_GRANULOCYTE_MIGRATION	GO_GRANULOCYTE_MIGRATION		63	0.725778	1.55199	0.00938086	0.217166	0.999	2127	tags=38%, list=12%, signal=43%
GO_POSITIVE_REGULATION_OF_ACTIN_FILAMENT_BUNDLE_ASSEMBLY	GO_POSITIVE_REGULATION_OF_ACTIN_FILAMENT_BUNDLE_ASSEMBLY		43	0.507594	1.42349	0.0348162	0.217395	1	1080	tags=21%, list=6%, signal=22%
GO_POSITIVE_REGULATION_OF_NIK_NF_KAPPAB_SIGNALING	GO_POSITIVE_REGULATION_OF_NIK_NF_KAPPAB_SIGNALING		29	0.579141	1.55297	0.0366089	0.217451	0.999	2598	tags=31%, list=15%, signal=36%
GO_REGULATION_OF_T_CELL_RECEPTOR_SIGNALING_PATHWAY	GO_REGULATION_OF_T_CELL_RECEPTOR_SIGNALING_PATHWAY		26	0.605031	1.42318	0.08413	0.217542	1	4966	tags=65%, list=29%, signal=92%
GO_BLOOD_VESSEL_REMODELING	GO_BLOOD_VESSEL_REMODELING		32	0.569092	1.42268	0.07393	0.217963	1	3281	tags=44%, list=19%, signal=54%
GO_DEFENSE_RESPONSE_TO_OTHER_ORGANISM	GO_DEFENSE_RESPONSE_TO_OTHER_ORGANISM		407	0.534012	1.55208	0.0153846	0.218034	0.999	2910	tags=32%, list=17%, signal=38%
GO_INTEGRIN_MEDIATED_SIGNALING_PATHWAY	GO_INTEGRIN_MEDIATED_SIGNALING_PATHWAY		77	0.619098	1.55309	0.0195312	0.218231	0.999	2725	tags=43%, list=16%, signal=51%
GO_HEMOSTASIS	GO_HEMOSTASIS		274	0.506664	1.55344	0.00761905	0.218426	0.999	2387	tags=29%, list=14%, signal=33%
GO_ORGANOPHOSPHATE_BIOSYNTHETIC_PROCESS	GO_ORGANOPHOSPHATE_BIOSYNTHETIC_PROCESS		381	0.342825	1.42213	0.006	0.218471	1	3129	tags=24%, list=18%, signal=28%
GO_NONRIBOSOMAL_PEPTIDE_BIOSYNTHETIC_PROCESS	GO_NONRIBOSOMAL_PEPTIDE_BIOSYNTHETIC_PROCESS		15	0.575333	1.42029	0.0905512	0.21857	1	3768	tags=60%, list=22%, signal=77%
GO_POSITIVE_REGULATION_OF_ALPHA_BETA_T_CELL_ACTIVATION	GO_POSITIVE_REGULATION_OF_ALPHA_BETA_T_CELL_ACTIVATION		50	0.569752	1.4205	0.10325	0.218621	1	3032	tags=42%, list=18%, signal=51%
GO_POSITIVE_REGULATION_OF_NF_KAPPAB_TRANSCRIPTION_FACTOR_ACTIVITY	GO_POSITIVE_REGULATION_OF_NF_KAPPAB_TRANSCRIPTION_FACTOR_ACTIVITY		127	0.468752	1.4206	0.0554455	0.218822	1	3126	tags=37%, list=18%, signal=45%
GO_NEGATIVE_REGULATION_OF_LEUKOCYTE_APOPTOTIC_PROCESS	GO_NEGATIVE_REGULATION_OF_LEUKOCYTE_APOPTOTIC_PROCESS		42	0.568784	1.42071	0.0764818	0.218995	1	3205	tags=38%, list=19%, signal=47%
GO_POSITIVE_REGULATION_OF_INTERLEUKIN_6_SECRETION	GO_POSITIVE_REGULATION_OF_INTERLEUKIN_6_SECRETION		16	0.688702	1.41804	0.0880626	0.219063	1	3041	tags=50%, list=18%, signal=61%
GO_REGULATION_OF_MULTICELLULAR_ORGANISMAL_METABOLIC_PROCESS	GO_REGULATION_OF_MULTICELLULAR_ORGANISMAL_METABOLIC_PROCESS		34	0.617926	1.55364	0.0286807	0.219109	0.999	2357	tags=35%, list=14%, signal=41%
GO_RESPONSE_TO_STEROID_HORMONE	GO_RESPONSE_TO_STEROID_HORMONE		470	0.412433	1.41708	0.00587084	0.219185	1	2202	tags=21%, list=13%, signal=23%
GO_RESPONSE_TO_INTERFERON_ALPHA	GO_RESPONSE_TO_INTERFERON_ALPHA		20	0.665808	1.41685	0.101562	0.219202	1	2387	tags=45%, list=14%, signal=52%
GO_NECROTIC_CELL_DEATH	GO_NECROTIC_CELL_DEATH		28	0.66217	1.41815	0.0618763	0.219228	1	1778	tags=36%, list=10%, signal=40%
GO_DENDRITIC_CELL_MIGRATION	GO_DENDRITIC_CELL_MIGRATION		21	0.671548	1.42072	0.0793951	0.219308	1	1302	tags=33%, list=8%, signal=36%
GO_RESPONSE_TO_INTERLEUKIN_6	GO_RESPONSE_TO_INTERLEUKIN_6		25	0.595559	1.42138	0.0511811	0.219339	1	3216	tags=40%, list=19%, signal=49%
GO_REACTIVE_OXYGEN_SPECIES_METABOLIC_PROCESS	GO_REACTIVE_OXYGEN_SPECIES_METABOLIC_PROCESS		88	0.492265	1.41758	0.046332	0.219409	1	2619	tags=27%, list=15%, signal=32%
GO_REGULATION_OF_RESPONSE_TO_REACTIVE_OXYGEN_SPECIES	GO_REGULATION_OF_RESPONSE_TO_REACTIVE_OXYGEN_SPECIES		31	0.610802	1.4171	0.0290135	0.219484	1	2619	tags=42%, list=15%, signal=49%
GO_STEROL_TRANSPORT	GO_STEROL_TRANSPORT		49	0.491685	1.4182	0.0493827	0.219492	1	2792	tags=31%, list=16%, signal=36%
GO_HIPPO_SIGNALING	GO_HIPPO_SIGNALING		26	0.53311	1.41917	0.0754352	0.219636	1	2184	tags=35%, list=13%, signal=40%
GO_RESPONSE_TO_RETINOIC_ACID	GO_RESPONSE_TO_RETINOIC_ACID		97	0.473439	1.42073	0.0349515	0.21965	1	2192	tags=24%, list=13%, signal=27%
GO_CELLULAR_RESPONSE_TO_AMINO_ACID_STIMULUS	GO_CELLULAR_RESPONSE_TO_AMINO_ACID_STIMULUS		48	0.578274	1.42093	0.0670498	0.219665	1	3041	tags=48%, list=18%, signal=58%
GO_EPITHELIAL_CELL_DEVELOPMENT	GO_EPITHELIAL_CELL_DEVELOPMENT		176	0.42268	1.41828	0.0232108	0.219724	1	2407	tags=27%, list=14%, signal=31%
GO_COENZYME_METABOLIC_PROCESS	GO_COENZYME_METABOLIC_PROCESS		234	0.37804	1.41716	0.0351967	0.219758	1	3059	tags=28%, list=18%, signal=33%
GO_REGULATION_OF_MYELOID_CELL_DIFFERENTIATION	GO_REGULATION_OF_MYELOID_CELL_DIFFERENTIATION		161	0.451831	1.41867	0.0422265	0.219774	1	2885	tags=30%, list=17%, signal=35%
GO_NEGATIVE_REGULATION_OF_DEFENSE_RESPONSE_TO_VIRUS	GO_NEGATIVE_REGULATION_OF_DEFENSE_RESPONSE_TO_VIRUS		17	0.567935	1.41928	0.0884615	0.219797	1	4167	tags=53%, list=24%, signal=70%
GO_EPIDERMIS_MORPHOGENESIS	GO_EPIDERMIS_MORPHOGENESIS		28	0.539558	1.41879	0.0708812	0.21989	1	1579	tags=21%, list=9%, signal=24%
GO_NEGATIVE_REGULATION_OF_EXTRINSIC_APOPTOTIC_SIGNALING_PATHWAY	GO_NEGATIVE_REGULATION_OF_EXTRINSIC_APOPTOTIC_SIGNALING_PATHWAY		94	0.561905	1.55376	0.0157791	0.219963	0.999	2648	tags=34%, list=15%, signal=40%
GO_FLUID_TRANSPORT	GO_FLUID_TRANSPORT		25	0.626526	1.41831	0.0682261	0.220037	1	1750	tags=24%, list=10%, signal=27%
GO_POSITIVE_REGULATION_OF_LYMPHOCYTE_DIFFERENTIATION	GO_POSITIVE_REGULATION_OF_LYMPHOCYTE_DIFFERENTIATION		75	0.605363	1.55418	0.0267686	0.220297	0.999	3041	tags=45%, list=18%, signal=55%
GO_REGULATION_OF_T_CELL_MIGRATION	GO_REGULATION_OF_T_CELL_MIGRATION		24	0.694773	1.41574	0.0722892	0.220345	1	3934	tags=63%, list=23%, signal=81%
GO_MYD88_INDEPENDENT_TOLL_LIKE_RECEPTOR_SIGNALING_PATHWAY	GO_MYD88_INDEPENDENT_TOLL_LIKE_RECEPTOR_SIGNALING_PATHWAY		28	0.61605	1.41577	0.0785855	0.220625	1	1778	tags=32%, list=10%, signal=36%
GO_HEXOSE_CATABOLIC_PROCESS	GO_HEXOSE_CATABOLIC_PROCESS		46	0.538306	1.55433	0.0375	0.221057	0.999	4398	tags=48%, list=26%, signal=64%
GO_REGULATION_OF_SMOOTH_MUSCLE_CELL_MIGRATION	GO_REGULATION_OF_SMOOTH_MUSCLE_CELL_MIGRATION		49	0.700469	1.55444	0.00192308	0.221878	0.999	2696	tags=49%, list=16%, signal=58%
GO_POSITIVE_REGULATION_OF_TRANSCRIPTION_FROM_RNA_POLYMERASE_II_PROMOTER_IN_RESPONSE_TO_STRESS	GO_POSITIVE_REGULATION_OF_TRANSCRIPTION_FROM_RNA_POLYMERASE_II_PROMOTER_IN_RESPONSE_TO_STRESS		21	0.5713	1.41436	0.101562	0.222027	1	1800	tags=33%, list=10%, signal=37%
GO_POSITIVE_REGULATION_OF_TOLL_LIKE_RECEPTOR_SIGNALING_PATHWAY	GO_POSITIVE_REGULATION_OF_TOLL_LIKE_RECEPTOR_SIGNALING_PATHWAY		19	0.740141	1.41389	0.0647059	0.222051	1	1887	tags=53%, list=11%, signal=59%
GO_POSITIVE_REGULATION_OF_COAGULATION	GO_POSITIVE_REGULATION_OF_COAGULATION		24	0.68704	1.41362	0.0752896	0.222134	1	1651	tags=33%, list=10%, signal=37%
GO_NECROPTOTIC_PROCESS	GO_NECROPTOTIC_PROCESS		21	0.697277	1.41401	0.055666	0.222232	1	1332	tags=38%, list=8%, signal=41%
GO_NADH_METABOLIC_PROCESS	GO_NADH_METABOLIC_PROCESS		33	0.57493	1.55483	0.0581162	0.222237	0.999	4039	tags=45%, list=23%, signal=59%
GO_VACUOLE_ORGANIZATION	GO_VACUOLE_ORGANIZATION		148	0.363614	1.41212	0.0566802	0.222275	1	2765	tags=20%, list=16%, signal=23%
GO_POLYOL_BIOSYNTHETIC_PROCESS	GO_POLYOL_BIOSYNTHETIC_PROCESS		23	0.569164	1.41174	0.0778443	0.22247	1	3879	tags=48%, list=23%, signal=62%
GO_DEFENSE_RESPONSE_TO_FUNGUS	GO_DEFENSE_RESPONSE_TO_FUNGUS		35	0.633679	1.41314	0.0649606	0.222492	1	767	tags=23%, list=4%, signal=24%
GO_BLOOD_VESSEL_MORPHOGENESIS	GO_BLOOD_VESSEL_MORPHOGENESIS		338	0.493654	1.4122	0.0392927	0.222515	1	2464	tags=33%, list=14%, signal=37%
GO_MULTICELLULAR_ORGANISMAL_HOMEOSTASIS	GO_MULTICELLULAR_ORGANISMAL_HOMEOSTASIS		248	0.381451	1.40962	0.0134357	0.222607	1	3674	tags=29%, list=21%, signal=36%
GO_TERPENOID_METABOLIC_PROCESS	GO_TERPENOID_METABOLIC_PROCESS		93	0.487043	1.41225	0.0332031	0.222798	1	1583	tags=23%, list=9%, signal=25%
GO_EXTRINSIC_APOPTOTIC_SIGNALING_PATHWAY	GO_EXTRINSIC_APOPTOTIC_SIGNALING_PATHWAY		95	0.466835	1.41246	0.0650888	0.222803	1	2529	tags=32%, list=15%, signal=37%
GO_POSITIVE_REGULATION_OF_DNA_TEMPLATED_TRANSCRIPTION_INITIATION	GO_POSITIVE_REGULATION_OF_DNA_TEMPLATED_TRANSCRIPTION_INITIATION		23	0.49703	1.41269	0.0750988	0.222814	1	2970	tags=35%, list=17%, signal=42%
GO_REGULATION_OF_TRANSLATION_IN_RESPONSE_TO_STRESS	GO_REGULATION_OF_TRANSLATION_IN_RESPONSE_TO_STRESS		17	0.577509	1.40922	0.124283	0.222815	1	4583	tags=59%, list=27%, signal=80%
GO_CHEMOKINE_MEDIATED_SIGNALING_PATHWAY	GO_CHEMOKINE_MEDIATED_SIGNALING_PATHWAY		62	0.639604	1.40899	0.0910853	0.222843	1	1449	tags=26%, list=8%, signal=28%
GO_POSITIVE_REGULATION_OF_ACUTE_INFLAMMATORY_RESPONSE	GO_POSITIVE_REGULATION_OF_ACUTE_INFLAMMATORY_RESPONSE		26	0.699665	1.40968	0.0607211	0.222864	1	2294	tags=46%, list=13%, signal=53%
GO_REGULATION_OF_ACTIN_FILAMENT_DEPOLYMERIZATION	GO_REGULATION_OF_ACTIN_FILAMENT_DEPOLYMERIZATION		43	0.488	1.40979	0.0817121	0.223055	1	3121	tags=35%, list=18%, signal=43%
GO_MRNA_TRANSCRIPTION	GO_MRNA_TRANSCRIPTION		19	0.593379	1.41108	0.0818713	0.223082	1	1544	tags=26%, list=9%, signal=29%
GO_FATTY_ACID_BETA_OXIDATION	GO_FATTY_ACID_BETA_OXIDATION		50	0.433938	1.41058	0.125737	0.223191	1	4448	tags=44%, list=26%, signal=59%
GO_REGULATION_OF_EPITHELIAL_CELL_APOPTOTIC_PROCESS	GO_REGULATION_OF_EPITHELIAL_CELL_APOPTOTIC_PROCESS		56	0.539543	1.41036	0.0502901	0.223209	1	2707	tags=36%, list=16%, signal=42%
GO_NEGATIVE_REGULATION_OF_APOPTOTIC_SIGNALING_PATHWAY	GO_NEGATIVE_REGULATION_OF_APOPTOTIC_SIGNALING_PATHWAY		184	0.425692	1.40991	0.0378486	0.223213	1	3244	tags=30%, list=19%, signal=37%
GO_SINGLE_ORGANISM_CELL_ADHESION	GO_SINGLE_ORGANISM_CELL_ADHESION		428	0.50287	1.55486	0.00191939	0.223232	0.999	3050	tags=36%, list=18%, signal=42%
GO_CELLULAR_RESPONSE_TO_NUTRIENT	GO_CELLULAR_RESPONSE_TO_NUTRIENT		39	0.608264	1.4083	0.0653846	0.223237	1	3041	tags=44%, list=18%, signal=53%
GO_REGULATION_OF_OSTEOCLAST_DIFFERENTIATION	GO_REGULATION_OF_OSTEOCLAST_DIFFERENTIATION		58	0.51898	1.41009	0.0711539	0.223276	1	3613	tags=41%, list=21%, signal=52%
GO_CELLULAR_RESPONSE_TO_OXYGEN_LEVELS	GO_CELLULAR_RESPONSE_TO_OXYGEN_LEVELS		133	0.471151	1.40849	0.0420842	0.223291	1	2192	tags=29%, list=13%, signal=33%
GO_PRODUCTION_OF_MOLECULAR_MEDIATOR_OF_IMMUNE_RESPONSE	GO_PRODUCTION_OF_MOLECULAR_MEDIATOR_OF_IMMUNE_RESPONSE		57	0.502679	1.4107	0.0759259	0.223362	1	3277	tags=33%, list=19%, signal=41%
GO_POSITIVE_REGULATION_OF_NEUTROPHIL_MIGRATION	GO_POSITIVE_REGULATION_OF_NEUTROPHIL_MIGRATION		26	0.68864	1.40802	0.0697211	0.223369	1	1771	tags=38%, list=10%, signal=43%
GO_GLYCOSYLATION	GO_GLYCOSYLATION		229	0.346931	1.40655	0.0315789	0.223376	1	3205	tags=31%, list=19%, signal=38%
GO_POSITIVE_REGULATION_OF_CELL_JUNCTION_ASSEMBLY	GO_POSITIVE_REGULATION_OF_CELL_JUNCTION_ASSEMBLY		22	0.592268	1.40739	0.0570866	0.223383	1	2655	tags=36%, list=15%, signal=43%
GO_RESPONSE_TO_MECHANICAL_STIMULUS	GO_RESPONSE_TO_MECHANICAL_STIMULUS		203	0.469055	1.40629	0.0290698	0.223442	1	2192	tags=28%, list=13%, signal=32%
GO_INTRINSIC_APOPTOTIC_SIGNALING_PATHWAY	GO_INTRINSIC_APOPTOTIC_SIGNALING_PATHWAY		143	0.406715	1.4041	0.043222	0.223494	1	2529	tags=27%, list=15%, signal=32%
GO_REGULATION_OF_INFLAMMATORY_RESPONSE_TO_ANTIGENIC_STIMULUS	GO_REGULATION_OF_INFLAMMATORY_RESPONSE_TO_ANTIGENIC_STIMULUS		15	0.645186	1.40774	0.0976562	0.223504	1	2707	tags=40%, list=16%, signal=47%
GO_REGULATION_OF_GRANULOCYTE_DIFFERENTIATION	GO_REGULATION_OF_GRANULOCYTE_DIFFERENTIATION		15	0.617145	1.40664	0.104167	0.2236	1	3183	tags=40%, list=19%, signal=49%
GO_COLLAGEN_FIBRIL_ORGANIZATION	GO_COLLAGEN_FIBRIL_ORGANIZATION		35	0.776199	1.40574	0.0614203	0.223611	1	3161	tags=74%, list=18%, signal=91%
GO_ORGANONITROGEN_COMPOUND_CATABOLIC_PROCESS	GO_ORGANONITROGEN_COMPOUND_CATABOLIC_PROCESS		316	0.417482	1.40487	0.0202429	0.223619	1	3252	tags=31%, list=19%, signal=37%
GO_HUMORAL_IMMUNE_RESPONSE_MEDIATED_BY_CIRCULATING_IMMUNOGLOBULIN	GO_HUMORAL_IMMUNE_RESPONSE_MEDIATED_BY_CIRCULATING_IMMUNOGLOBULIN		42	0.719584	1.40422	0.056	0.22363	1	1381	tags=38%, list=8%, signal=41%
GO_GRANULOCYTE_ACTIVATION	GO_GRANULOCYTE_ACTIVATION		17	0.765557	1.40741	0.0439771	0.223687	1	2670	tags=59%, list=16%, signal=70%
GO_LEUKOCYTE_HOMEOSTASIS	GO_LEUKOCYTE_HOMEOSTASIS		58	0.507848	1.405	0.0838207	0.223746	1	4130	tags=40%, list=24%, signal=52%
GO_FATTY_ACID_METABOLIC_PROCESS	GO_FATTY_ACID_METABOLIC_PROCESS		265	0.406219	1.40676	0.0460922	0.223753	1	3781	tags=33%, list=22%, signal=41%
GO_ANTIGEN_PROCESSING_AND_PRESENTATION	GO_ANTIGEN_PROCESSING_AND_PRESENTATION		194	0.457112	1.40583	0.0935114	0.223779	1	2724	tags=34%, list=16%, signal=40%
GO_POSITIVE_REGULATION_OF_ANTIGEN_PROCESSING_AND_PRESENTATION	GO_POSITIVE_REGULATION_OF_ANTIGEN_PROCESSING_AND_PRESENTATION		16	0.684155	1.40431	0.0860421	0.223807	1	2598	tags=50%, list=15%, signal=59%
GO_CELLULAR_RESPONSE_TO_ACID_CHEMICAL	GO_CELLULAR_RESPONSE_TO_ACID_CHEMICAL		162	0.45819	1.40693	0.0247619	0.223837	1	2231	tags=28%, list=13%, signal=32%
GO_RESPONSE_TO_EXOGENOUS_DSRNA	GO_RESPONSE_TO_EXOGENOUS_DSRNA		38	0.485428	1.4051	0.0870406	0.223945	1	3084	tags=34%, list=18%, signal=42%
GO_CD4_POSITIVE_ALPHA_BETA_T_CELL_ACTIVATION	GO_CD4_POSITIVE_ALPHA_BETA_T_CELL_ACTIVATION		34	0.518123	1.40527	0.102273	0.223994	1	2199	tags=26%, list=13%, signal=30%
GO_EPIDERMAL_CELL_DIFFERENTIATION	GO_EPIDERMAL_CELL_DIFFERENTIATION		114	0.394429	1.40439	0.0483559	0.224021	1	2281	tags=18%, list=13%, signal=21%
GO_BILE_ACID_BIOSYNTHETIC_PROCESS	GO_BILE_ACID_BIOSYNTHETIC_PROCESS		20	0.590719	1.5549	0.0309478	0.224203	0.999	2604	tags=30%, list=15%, signal=35%
GO_ACTIVATION_OF_PHOSPHOLIPASE_C_ACTIVITY	GO_ACTIVATION_OF_PHOSPHOLIPASE_C_ACTIVITY		27	0.591512	1.40328	0.0590551	0.224336	1	1703	tags=26%, list=10%, signal=29%
GO_EPIDERMIS_DEVELOPMENT	GO_EPIDERMIS_DEVELOPMENT		219	0.369972	1.40278	0.0229008	0.224431	1	2281	tags=17%, list=13%, signal=19%
GO_MODULATION_BY_HOST_OF_VIRAL_PROCESS	GO_MODULATION_BY_HOST_OF_VIRAL_PROCESS		17	0.640992	1.39994	0.052	0.224513	1	3026	tags=41%, list=18%, signal=50%
GO_REGULATION_OF_LAMELLIPODIUM_ASSEMBLY	GO_REGULATION_OF_LAMELLIPODIUM_ASSEMBLY		25	0.463155	1.39931	0.10101	0.224527	1	4047	tags=44%, list=24%, signal=57%
GO_RECEPTOR_MEDIATED_ENDOCYTOSIS	GO_RECEPTOR_MEDIATED_ENDOCYTOSIS		196	0.458158	1.39969	0.061144	0.224546	1	3325	tags=31%, list=19%, signal=38%
GO_B_CELL_ACTIVATION_INVOLVED_IN_IMMUNE_RESPONSE	GO_B_CELL_ACTIVATION_INVOLVED_IN_IMMUNE_RESPONSE		34	0.52725	1.40033	0.0769231	0.224591	1	3112	tags=35%, list=18%, signal=43%
GO_REGULATION_OF_TISSUE_REMODELING	GO_REGULATION_OF_TISSUE_REMODELING		59	0.523711	1.39901	0.0581395	0.224686	1	3068	tags=39%, list=18%, signal=47%
GO_RESPONSE_TO_VITAMIN	GO_RESPONSE_TO_VITAMIN		98	0.511598	1.40283	0.0307102	0.224695	1	2204	tags=29%, list=13%, signal=33%
GO_PYRIMIDINE_CONTAINING_COMPOUND_METABOLIC_PROCESS	GO_PYRIMIDINE_CONTAINING_COMPOUND_METABOLIC_PROCESS		67	0.426917	1.3994	0.0455408	0.224698	1	3134	tags=24%, list=18%, signal=29%
GO_CYTOPLASMIC_PATTERN_RECOGNITION_RECEPTOR_SIGNALING_PATHWAY	GO_CYTOPLASMIC_PATTERN_RECOGNITION_RECEPTOR_SIGNALING_PATHWAY		28	0.542142	1.40002	0.12476	0.224712	1	2598	tags=36%, list=15%, signal=42%
GO_GLUCAN_METABOLIC_PROCESS	GO_GLUCAN_METABOLIC_PROCESS		53	0.461788	1.40039	0.0645793	0.224814	1	4290	tags=47%, list=25%, signal=63%
GO_ENDOCRINE_PROCESS	GO_ENDOCRINE_PROCESS		43	0.495902	1.39872	0.0712871	0.224831	1	1703	tags=16%, list=10%, signal=18%
GO_ADAPTIVE_IMMUNE_RESPONSE_BASED_ON_SOMATIC_RECOMBINATION_OF_IMMUNE_RECEPTORS_BUILT_FROM_IMMUNOGLOBULIN_SUPERFAMILY_DOMAINS	GO_ADAPTIVE_IMMUNE_RESPONSE_BASED_ON_SOMATIC_RECOMBINATION_OF_IMMUNE_RECEPTORS_BUILT_FROM_IMMUNOGLOBULIN_SUPERFAMILY_DOMAINS		125	0.677147	1.55513	0.0135659	0.224871	0.999	2973	tags=44%, list=17%, signal=53%
GO_REGULATION_OF_FIBROBLAST_PROLIFERATION	GO_REGULATION_OF_FIBROBLAST_PROLIFERATION		78	0.517051	1.39758	0.0527344	0.224919	1	1797	tags=29%, list=10%, signal=33%
GO_POSITIVE_REGULATION_OF_LYMPHOCYTE_MIGRATION	GO_POSITIVE_REGULATION_OF_LYMPHOCYTE_MIGRATION		25	0.691457	1.40042	0.0974659	0.22508	1	4108	tags=64%, list=24%, signal=84%
GO_UBIQUITIN_DEPENDENT_PROTEIN_CATABOLIC_PROCESS_VIA_THE_MULTIVESICULAR_BODY_SORTING_PATHWAY	GO_UBIQUITIN_DEPENDENT_PROTEIN_CATABOLIC_PROCESS_VIA_THE_MULTIVESICULAR_BODY_SORTING_PATHWAY		16	0.485513	1.40064	0.109091	0.225092	1	9	tags=6%, list=0%, signal=6%
GO_RENAL_SYSTEM_PROCESS_INVOLVED_IN_REGULATION_OF_BLOOD_VOLUME	GO_RENAL_SYSTEM_PROCESS_INVOLVED_IN_REGULATION_OF_BLOOD_VOLUME		17	0.572879	1.39763	0.0761905	0.225177	1	2387	tags=35%, list=14%, signal=41%
GO_POSITIVE_REGULATION_OF_TUMOR_NECROSIS_FACTOR_SUPERFAMILY_CYTOKINE_PRODUCTION	GO_POSITIVE_REGULATION_OF_TUMOR_NECROSIS_FACTOR_SUPERFAMILY_CYTOKINE_PRODUCTION		54	0.645358	1.40079	0.120229	0.225233	1	2342	tags=43%, list=14%, signal=49%
GO_BRANCHING_MORPHOGENESIS_OF_AN_EPITHELIAL_TUBE	GO_BRANCHING_MORPHOGENESIS_OF_AN_EPITHELIAL_TUBE		126	0.475528	1.39778	0.0256917	0.225282	1	3367	tags=40%, list=20%, signal=50%
GO_INOSITOL_PHOSPHATE_MEDIATED_SIGNALING	GO_INOSITOL_PHOSPHATE_MEDIATED_SIGNALING		18	0.568638	1.40131	0.0808679	0.22534	1	3678	tags=50%, list=21%, signal=64%
GO_NEGATIVE_REGULATION_OF_CELL_KILLING	GO_NEGATIVE_REGULATION_OF_CELL_KILLING		17	0.667352	1.40147	0.105364	0.225404	1	2816	tags=65%, list=16%, signal=77%
GO_REGULATION_OF_HYDROGEN_PEROXIDE_METABOLIC_PROCESS	GO_REGULATION_OF_HYDROGEN_PEROXIDE_METABOLIC_PROCESS		15	0.598668	1.3979	0.0873786	0.225421	1	1019	tags=27%, list=6%, signal=28%
GO_CELLULAR_DEFENSE_RESPONSE	GO_CELLULAR_DEFENSE_RESPONSE		53	0.573558	1.40085	0.103578	0.225457	1	2376	tags=38%, list=14%, signal=44%
GO_REGULATION_OF_HEAT_GENERATION	GO_REGULATION_OF_HEAT_GENERATION		15	0.701469	1.40183	0.0497132	0.22552	1	2059	tags=60%, list=12%, signal=68%
GO_REGULATION_OF_BONE_DEVELOPMENT	GO_REGULATION_OF_BONE_DEVELOPMENT		15	0.703534	1.39804	0.0752475	0.225552	1	3284	tags=67%, list=19%, signal=82%
GO_REGULATION_OF_ENDOTHELIAL_CELL_MIGRATION	GO_REGULATION_OF_ENDOTHELIAL_CELL_MIGRATION		108	0.491324	1.40098	0.0653465	0.225562	1	1838	tags=25%, list=11%, signal=28%
GO_REGULATION_OF_FATTY_ACID_BIOSYNTHETIC_PROCESS	GO_REGULATION_OF_FATTY_ACID_BIOSYNTHETIC_PROCESS		35	0.508574	1.40157	0.0621359	0.225575	1	2797	tags=31%, list=16%, signal=37%
GO_REGULATION_OF_INTERLEUKIN_8_PRODUCTION	GO_REGULATION_OF_INTERLEUKIN_8_PRODUCTION		58	0.687135	1.55519	0.0170455	0.225823	0.999	3632	tags=57%, list=21%, signal=72%
GO_RESPONSE_TO_PLATELET_DERIVED_GROWTH_FACTOR	GO_RESPONSE_TO_PLATELET_DERIVED_GROWTH_FACTOR		18	0.689748	1.39638	0.0850662	0.226206	1	1797	tags=39%, list=10%, signal=43%
GO_ENDOCYTOSIS	GO_ENDOCYTOSIS		450	0.414597	1.39642	0.0577689	0.226455	1	3325	tags=31%, list=19%, signal=38%
GO_CELLULAR_RESPONSE_TO_HEAT	GO_CELLULAR_RESPONSE_TO_HEAT		33	0.670725	1.5553	0.00579151	0.226698	0.999	1427	tags=39%, list=8%, signal=43%
GO_RESPONSE_TO_ESTROGEN	GO_RESPONSE_TO_ESTROGEN		205	0.442545	1.39572	0.0196078	0.226916	1	2379	tags=26%, list=14%, signal=30%
GO_O_GLYCAN_PROCESSING	GO_O_GLYCAN_PROCESSING		53	0.496638	1.55544	0.0298805	0.227464	0.999	3205	tags=36%, list=19%, signal=44%
GO_NUCLEOTIDE_PHOSPHORYLATION	GO_NUCLEOTIDE_PHOSPHORYLATION		51	0.541391	1.55892	0.0447471	0.227864	0.999	3064	tags=39%, list=18%, signal=48%
GO_CELLULAR_RESPONSE_TO_OXIDATIVE_STRESS	GO_CELLULAR_RESPONSE_TO_OXIDATIVE_STRESS		176	0.444507	1.39492	0.0172084	0.227869	1	2716	tags=31%, list=16%, signal=37%
GO_LEUKOCYTE_ACTIVATION	GO_LEUKOCYTE_ACTIVATION		391	0.5271	1.55834	0.0193424	0.228014	0.999	2848	tags=35%, list=17%, signal=40%
GO_NEGATIVE_REGULATION_OF_INTERLEUKIN_6_PRODUCTION	GO_NEGATIVE_REGULATION_OF_INTERLEUKIN_6_PRODUCTION		31	0.621953	1.55556	0.0504854	0.228347	0.999	3613	tags=39%, list=21%, signal=49%
GO_ISOPRENOID_METABOLIC_PROCESS	GO_ISOPRENOID_METABOLIC_PROCESS		111	0.446604	1.39434	0.0272374	0.228434	1	1736	tags=22%, list=10%, signal=24%
GO_REGULATION_OF_TRANSFORMING_GROWTH_FACTOR_BETA_PRODUCTION	GO_REGULATION_OF_TRANSFORMING_GROWTH_FACTOR_BETA_PRODUCTION		24	0.665273	1.55602	0.0154143	0.228533	0.999	1559	tags=25%, list=9%, signal=27%
GO_REGULATION_OF_EXCRETION	GO_REGULATION_OF_EXCRETION		28	0.50156	1.39373	0.0779727	0.228685	1	1940	tags=18%, list=11%, signal=20%
GO_NIK_NF_KAPPAB_SIGNALING	GO_NIK_NF_KAPPAB_SIGNALING		80	0.499811	1.55963	0.0582329	0.228697	0.998	3849	tags=33%, list=22%, signal=42%
GO_RESPONSE_TO_COLD	GO_RESPONSE_TO_COLD		40	0.583588	1.39349	0.0343511	0.228757	1	3026	tags=45%, list=18%, signal=54%
GO_ENDODERM_FORMATION	GO_ENDODERM_FORMATION		47	0.602489	1.39203	0.0790514	0.228764	1	1849	tags=38%, list=11%, signal=43%
GO_POSITIVE_REGULATION_OF_TRANSFORMING_GROWTH_FACTOR_BETA_PRODUCTION	GO_POSITIVE_REGULATION_OF_TRANSFORMING_GROWTH_FACTOR_BETA_PRODUCTION		16	0.651158	1.39389	0.0738523	0.22877	1	1559	tags=25%, list=9%, signal=27%
GO_REGULATION_OF_MONOCYTE_CHEMOTAXIS	GO_REGULATION_OF_MONOCYTE_CHEMOTAXIS		19	0.746667	1.39214	0.0862745	0.228898	1	1302	tags=42%, list=8%, signal=46%
GO_POSITIVE_REGULATION_OF_VASCULAR_ENDOTHELIAL_GROWTH_FACTOR_PRODUCTION	GO_POSITIVE_REGULATION_OF_VASCULAR_ENDOTHELIAL_GROWTH_FACTOR_PRODUCTION		25	0.768009	1.55732	0.00574713	0.228909	0.999	1651	tags=44%, list=10%, signal=49%
GO_ETHANOLAMINE_CONTAINING_COMPOUND_METABOLIC_PROCESS	GO_ETHANOLAMINE_CONTAINING_COMPOUND_METABOLIC_PROCESS		77	0.416558	1.39274	0.0596421	0.228942	1	4053	tags=35%, list=24%, signal=46%
GO_POSITIVE_REGULATION_OF_BLOOD_PRESSURE	GO_POSITIVE_REGULATION_OF_BLOOD_PRESSURE		35	0.527487	1.55893	0.0374753	0.228982	0.999	1940	tags=20%, list=11%, signal=22%
GO_REGULATION_OF_BONE_RESORPTION	GO_REGULATION_OF_BONE_RESORPTION		31	0.559153	1.391	0.0788462	0.229009	1	1556	tags=32%, list=9%, signal=35%
GO_POSITIVE_REGULATION_OF_HOMEOSTATIC_PROCESS	GO_POSITIVE_REGULATION_OF_HOMEOSTATIC_PROCESS		196	0.378135	1.39246	0.0360721	0.229033	1	2204	tags=19%, list=13%, signal=21%
GO_REGULATION_OF_CARBOHYDRATE_BIOSYNTHETIC_PROCESS	GO_REGULATION_OF_CARBOHYDRATE_BIOSYNTHETIC_PROCESS		78	0.474911	1.55672	0.00389105	0.229148	0.999	4219	tags=41%, list=25%, signal=54%
GO_INTRINSIC_APOPTOTIC_SIGNALING_PATHWAY_IN_RESPONSE_TO_DNA_DAMAGE	GO_INTRINSIC_APOPTOTIC_SIGNALING_PATHWAY_IN_RESPONSE_TO_DNA_DAMAGE		68	0.473546	1.39218	0.0729783	0.229164	1	2003	tags=26%, list=12%, signal=30%
GO_REGULATION_OF_OXIDOREDUCTASE_ACTIVITY	GO_REGULATION_OF_OXIDOREDUCTASE_ACTIVITY		85	0.422509	1.39109	0.0313112	0.229203	1	4108	tags=38%, list=24%, signal=49%
GO_OSTEOCLAST_DIFFERENTIATION	GO_OSTEOCLAST_DIFFERENTIATION		27	0.578922	1.39128	0.0722892	0.229224	1	3458	tags=48%, list=20%, signal=60%
GO_GENERATION_OF_PRECURSOR_METABOLITES_AND_ENERGY	GO_GENERATION_OF_PRECURSOR_METABOLITES_AND_ENERGY		265	0.331462	1.39275	0.0877551	0.229239	1	4473	tags=34%, list=26%, signal=45%
GO_DETOXIFICATION	GO_DETOXIFICATION		66	0.585192	1.55618	0.0138067	0.229305	0.999	2990	tags=35%, list=17%, signal=42%
GO_HIGH_DENSITY_LIPOPROTEIN_PARTICLE_REMODELING	GO_HIGH_DENSITY_LIPOPROTEIN_PARTICLE_REMODELING		15	0.630731	1.39137	0.0848126	0.229367	1	1397	tags=27%, list=8%, signal=29%
GO_REGULATION_OF_T_CELL_CYTOKINE_PRODUCTION	GO_REGULATION_OF_T_CELL_CYTOKINE_PRODUCTION		21	0.515967	1.39277	0.0751445	0.229509	1	2910	tags=38%, list=17%, signal=46%
GO_REGULATION_OF_SYSTEMIC_ARTERIAL_BLOOD_PRESSURE_MEDIATED_BY_A_CHEMICAL_SIGNAL	GO_REGULATION_OF_SYSTEMIC_ARTERIAL_BLOOD_PRESSURE_MEDIATED_BY_A_CHEMICAL_SIGNAL		45	0.577354	1.55977	0.0216535	0.22958	0.998	1703	tags=18%, list=10%, signal=20%
GO_RETINOIC_ACID_METABOLIC_PROCESS	GO_RETINOIC_ACID_METABOLIC_PROCESS		16	0.676051	1.39028	0.0728347	0.22971	1	2148	tags=38%, list=12%, signal=43%
GO_REGULATION_OF_NEURON_PROJECTION_REGENERATION	GO_REGULATION_OF_NEURON_PROJECTION_REGENERATION		20	0.539515	1.38989	0.0664062	0.22998	1	2204	tags=30%, list=13%, signal=34%
GO_PROSTANOID_METABOLIC_PROCESS	GO_PROSTANOID_METABOLIC_PROCESS		26	0.643478	1.38916	0.0841487	0.230487	1	1257	tags=38%, list=7%, signal=41%
GO_REGULATION_OF_MACROPHAGE_DERIVED_FOAM_CELL_DIFFERENTIATION	GO_REGULATION_OF_MACROPHAGE_DERIVED_FOAM_CELL_DIFFERENTIATION		28	0.582321	1.38936	0.0781563	0.230489	1	5012	tags=64%, list=29%, signal=91%
GO_CELLULAR_CARBOHYDRATE_CATABOLIC_PROCESS	GO_CELLULAR_CARBOHYDRATE_CATABOLIC_PROCESS		31	0.571117	1.5598	0.0204082	0.230693	0.998	3059	tags=39%, list=18%, signal=47%
GO_PLATELET_DEGRANULATION	GO_PLATELET_DEGRANULATION		102	0.651277	1.56017	0.00570342	0.23105	0.998	2741	tags=46%, list=16%, signal=54%
GO_REGULATION_OF_LIPID_CATABOLIC_PROCESS	GO_REGULATION_OF_LIPID_CATABOLIC_PROCESS		49	0.461636	1.38706	0.074364	0.231408	1	3662	tags=37%, list=21%, signal=47%
GO_RESPONSE_TO_ACID_CHEMICAL	GO_RESPONSE_TO_ACID_CHEMICAL		295	0.413171	1.38679	0.0193424	0.231428	1	2231	tags=23%, list=13%, signal=26%
GO_BONE_RESORPTION	GO_BONE_RESORPTION		21	0.572881	1.38724	0.0939335	0.231452	1	4804	tags=57%, list=28%, signal=79%
GO_NEGATIVE_REGULATION_OF_INTERLEUKIN_2_PRODUCTION	GO_NEGATIVE_REGULATION_OF_INTERLEUKIN_2_PRODUCTION		15	0.609353	1.38801	0.0965251	0.231529	1	3241	tags=40%, list=19%, signal=49%
GO_DEFENSE_RESPONSE_TO_GRAM_NEGATIVE_BACTERIUM	GO_DEFENSE_RESPONSE_TO_GRAM_NEGATIVE_BACTERIUM		43	0.558651	1.3882	0.0953307	0.231549	1	1887	tags=23%, list=11%, signal=26%
GO_CELLULAR_RESPONSE_TO_KETONE	GO_CELLULAR_RESPONSE_TO_KETONE		70	0.49391	1.38755	0.0545809	0.231609	1	1403	tags=26%, list=8%, signal=28%
GO_REGULATION_OF_FATTY_ACID_METABOLIC_PROCESS	GO_REGULATION_OF_FATTY_ACID_METABOLIC_PROCESS		79	0.429465	1.38733	0.042	0.23165	1	2900	tags=28%, list=17%, signal=33%
GO_ER_NUCLEUS_SIGNALING_PATHWAY	GO_ER_NUCLEUS_SIGNALING_PATHWAY		31	0.514183	1.38772	0.117424	0.231661	1	4282	tags=48%, list=25%, signal=64%
GO_REGULATION_OF_INTERLEUKIN_1_PRODUCTION	GO_REGULATION_OF_INTERLEUKIN_1_PRODUCTION		52	0.578152	1.38598	0.108159	0.231704	1	2923	tags=40%, list=17%, signal=49%
GO_REGULATION_OF_INTERFERON_BETA_PRODUCTION	GO_REGULATION_OF_INTERFERON_BETA_PRODUCTION		42	0.5877	1.38618	0.121857	0.231729	1	4017	tags=55%, list=23%, signal=71%
GO_NEGATIVE_REGULATION_OF_SIGNAL_TRANSDUCTION_IN_ABSENCE_OF_LIGAND	GO_NEGATIVE_REGULATION_OF_SIGNAL_TRANSDUCTION_IN_ABSENCE_OF_LIGAND		31	0.532982	1.38575	0.0825516	0.231745	1	2516	tags=35%, list=15%, signal=41%
GO_ZYMOGEN_ACTIVATION	GO_ZYMOGEN_ACTIVATION		105	0.511182	1.56036	0.00587084	0.23185	0.998	3553	tags=35%, list=21%, signal=44%
GO_PYRIMIDINE_NUCLEOSIDE_BIOSYNTHETIC_PROCESS	GO_PYRIMIDINE_NUCLEOSIDE_BIOSYNTHETIC_PROCESS		26	0.530454	1.3863	0.10728	0.231868	1	937	tags=15%, list=5%, signal=16%
GO_REGULATION_OF_T_CELL_APOPTOTIC_PROCESS	GO_REGULATION_OF_T_CELL_APOPTOTIC_PROCESS		31	0.525606	1.38512	0.107004	0.232066	1	4080	tags=42%, list=24%, signal=55%
GO_RESPONSE_TO_GAMMA_RADIATION	GO_RESPONSE_TO_GAMMA_RADIATION		47	0.523191	1.38521	0.0756144	0.232247	1	2529	tags=32%, list=15%, signal=37%
GO_MULTICELLULAR_ORGANISM_METABOLIC_PROCESS	GO_MULTICELLULAR_ORGANISM_METABOLIC_PROCESS		83	0.601661	1.38453	0.0953307	0.232285	1	2336	tags=43%, list=14%, signal=50%
GO_REGULATION_OF_LYMPHOCYTE_MEDIATED_IMMUNITY	GO_REGULATION_OF_LYMPHOCYTE_MEDIATED_IMMUNITY		104	0.43543	1.38473	0.110899	0.232331	1	4595	tags=46%, list=27%, signal=63%
GO_POSITIVE_REGULATION_OF_DNA_BINDING	GO_POSITIVE_REGULATION_OF_DNA_BINDING		38	0.537298	1.38388	0.0737864	0.232364	1	1475	tags=26%, list=9%, signal=29%
GO_NEGATIVE_REGULATION_OF_LYMPHOCYTE_MEDIATED_IMMUNITY	GO_NEGATIVE_REGULATION_OF_LYMPHOCYTE_MEDIATED_IMMUNITY		33	0.532328	1.38388	0.119231	0.232664	1	2816	tags=42%, list=16%, signal=51%
GO_KERATAN_SULFATE_METABOLIC_PROCESS	GO_KERATAN_SULFATE_METABOLIC_PROCESS		32	0.66084	1.56104	0.0135922	0.232708	0.998	3597	tags=50%, list=21%, signal=63%
GO_POSITIVE_REGULATION_OF_NATURAL_KILLER_CELL_ACTIVATION	GO_POSITIVE_REGULATION_OF_NATURAL_KILLER_CELL_ACTIVATION		16	0.601602	1.38403	0.127376	0.232742	1	3742	tags=50%, list=22%, signal=64%
GO_REGULATION_OF_CARBOHYDRATE_METABOLIC_PROCESS	GO_REGULATION_OF_CARBOHYDRATE_METABOLIC_PROCESS		148	0.381348	1.38201	0.0226843	0.232992	1	4141	tags=34%, list=24%, signal=45%
GO_RESPONSE_TO_COPPER_ION	GO_RESPONSE_TO_COPPER_ION		25	0.68156	1.56037	0.00782779	0.233026	0.998	2529	tags=48%, list=15%, signal=56%
GO_CARBOHYDRATE_TRANSPORT	GO_CARBOHYDRATE_TRANSPORT		88	0.455292	1.56144	0.0119048	0.233071	0.998	3025	tags=26%, list=18%, signal=32%
GO_VASCULAR_PROCESS_IN_CIRCULATORY_SYSTEM	GO_VASCULAR_PROCESS_IN_CIRCULATORY_SYSTEM		158	0.438337	1.38312	0.0309278	0.233174	1	1703	tags=18%, list=10%, signal=20%
GO_POSITIVE_REGULATION_OF_ALCOHOL_BIOSYNTHETIC_PROCESS	GO_POSITIVE_REGULATION_OF_ALCOHOL_BIOSYNTHETIC_PROCESS		22	0.594047	1.38204	0.0772277	0.233254	1	2876	tags=36%, list=17%, signal=44%
GO_NEGATIVE_REGULATION_OF_HEMOPOIESIS	GO_NEGATIVE_REGULATION_OF_HEMOPOIESIS		108	0.465938	1.38215	0.0642023	0.23338	1	2885	tags=31%, list=17%, signal=38%
GO_T_HELPER_1_TYPE_IMMUNE_RESPONSE	GO_T_HELPER_1_TYPE_IMMUNE_RESPONSE		18	0.636935	1.38232	0.129094	0.2334	1	3842	tags=61%, list=22%, signal=79%
GO_GLYCERALDEHYDE_3_PHOSPHATE_METABOLIC_PROCESS	GO_GLYCERALDEHYDE_3_PHOSPHATE_METABOLIC_PROCESS		16	0.508517	1.38242	0.139764	0.233559	1	4571	tags=44%, list=27%, signal=60%
GO_EXCRETION	GO_EXCRETION		40	0.449482	1.38248	0.0856574	0.233784	1	2920	tags=20%, list=17%, signal=24%
GO_REGULATION_OF_ATPASE_ACTIVITY	GO_REGULATION_OF_ATPASE_ACTIVITY		57	0.427834	1.38121	0.0569745	0.233871	1	1885	tags=21%, list=11%, signal=24%
GO_POSITIVE_REGULATION_OF_DNA_RECOMBINATION	GO_POSITIVE_REGULATION_OF_DNA_RECOMBINATION		16	0.629279	1.5615	0.0385356	0.234189	0.998	2602	tags=31%, list=15%, signal=37%
GO_POSITIVE_REGULATION_OF_HEMOPOIESIS	GO_POSITIVE_REGULATION_OF_HEMOPOIESIS		152	0.549398	1.56157	0.013308	0.235288	0.998	3068	tags=38%, list=18%, signal=45%
GO_CELLULAR_RESPONSE_TO_DSRNA	GO_CELLULAR_RESPONSE_TO_DSRNA		30	0.474943	1.37964	0.074	0.235641	1	3084	tags=37%, list=18%, signal=45%
GO_POSITIVE_REGULATION_OF_RECEPTOR_MEDIATED_ENDOCYTOSIS	GO_POSITIVE_REGULATION_OF_RECEPTOR_MEDIATED_ENDOCYTOSIS		46	0.494587	1.37904	0.078125	0.235684	1	2301	tags=26%, list=13%, signal=30%
GO_POSITIVE_REGULATION_OF_ERK1_AND_ERK2_CASCADE	GO_POSITIVE_REGULATION_OF_ERK1_AND_ERK2_CASCADE		153	0.56392	1.563	0.00380952	0.235753	0.998	1777	tags=27%, list=10%, signal=30%
GO_POSITIVE_REGULATION_OF_CD4_POSITIVE_ALPHA_BETA_T_CELL_ACTIVATION	GO_POSITIVE_REGULATION_OF_CD4_POSITIVE_ALPHA_BETA_T_CELL_ACTIVATION		27	0.610587	1.37914	0.111531	0.235823	1	1980	tags=37%, list=12%, signal=42%
GO_REGULATION_OF_INTRINSIC_APOPTOTIC_SIGNALING_PATHWAY	GO_REGULATION_OF_INTRINSIC_APOPTOTIC_SIGNALING_PATHWAY		130	0.389966	1.37971	0.0826923	0.235836	1	4628	tags=42%, list=27%, signal=56%
GO_REGULATION_OF_VACUOLAR_TRANSPORT	GO_REGULATION_OF_VACUOLAR_TRANSPORT		28	0.464102	1.37934	0.1	0.235841	1	2619	tags=18%, list=15%, signal=21%
GO_CARBOHYDRATE_BIOSYNTHETIC_PROCESS	GO_CARBOHYDRATE_BIOSYNTHETIC_PROCESS		112	0.463695	1.56229	0.00982318	0.236225	0.998	3059	tags=32%, list=18%, signal=39%
GO_EXTRACELLULAR_STRUCTURE_ORGANIZATION	GO_EXTRACELLULAR_STRUCTURE_ORGANIZATION		284	0.649838	1.56164	0.00585938	0.236451	0.998	2942	tags=48%, list=17%, signal=57%
GO_CELLULAR_MODIFIED_AMINO_ACID_METABOLIC_PROCESS	GO_CELLULAR_MODIFIED_AMINO_ACID_METABOLIC_PROCESS		184	0.463643	1.56306	0.00589391	0.236954	0.998	3016	tags=34%, list=18%, signal=40%
GO_PARASYMPATHETIC_NERVOUS_SYSTEM_DEVELOPMENT	GO_PARASYMPATHETIC_NERVOUS_SYSTEM_DEVELOPMENT		16	0.634349	1.37788	0.077381	0.23709	1	2026	tags=31%, list=12%, signal=35%
GO_REGULATION_OF_RESPONSE_TO_OXIDATIVE_STRESS	GO_REGULATION_OF_RESPONSE_TO_OXIDATIVE_STRESS		56	0.500655	1.37751	0.044316	0.237287	1	2703	tags=36%, list=16%, signal=42%
GO_CELLULAR_RESPONSE_TO_REACTIVE_OXYGEN_SPECIES	GO_CELLULAR_RESPONSE_TO_REACTIVE_OXYGEN_SPECIES		101	0.463382	1.37732	0.0363985	0.237293	1	2123	tags=28%, list=12%, signal=31%
GO_PIGMENTATION	GO_PIGMENTATION		79	0.391623	1.37657	0.0437376	0.237878	1	2404	tags=20%, list=14%, signal=23%
GO_REGULATION_OF_CELLULAR_KETONE_METABOLIC_PROCESS	GO_REGULATION_OF_CELLULAR_KETONE_METABOLIC_PROCESS		160	0.346421	1.37676	0.041502	0.237888	1	2970	tags=24%, list=17%, signal=28%
GO_FATTY_ACID_TRANSPORT	GO_FATTY_ACID_TRANSPORT		55	0.563325	1.56322	0.00583658	0.237923	0.998	2976	tags=36%, list=17%, signal=44%
GO_RESPONSE_TO_INTERLEUKIN_4	GO_RESPONSE_TO_INTERLEUKIN_4		29	0.481372	1.37621	0.125954	0.238139	1	3041	tags=38%, list=18%, signal=46%
GO_REGULATION_OF_LYMPHOCYTE_DIFFERENTIATION	GO_REGULATION_OF_LYMPHOCYTE_DIFFERENTIATION		124	0.52519	1.57345	0.0189753	0.238193	0.998	3041	tags=35%, list=18%, signal=43%
GO_POSITIVE_REGULATION_OF_PROTEIN_SECRETION	GO_POSITIVE_REGULATION_OF_PROTEIN_SECRETION		193	0.433198	1.37593	0.054717	0.238262	1	3988	tags=38%, list=23%, signal=49%
GO_LYMPHOCYTE_ACTIVATION	GO_LYMPHOCYTE_ACTIVATION		324	0.507993	1.57402	0.0231214	0.238447	0.998	3112	tags=34%, list=18%, signal=41%
GO_NEGATIVE_REGULATION_OF_REACTIVE_OXYGEN_SPECIES_METABOLIC_PROCESS	GO_NEGATIVE_REGULATION_OF_REACTIVE_OXYGEN_SPECIES_METABOLIC_PROCESS		40	0.502203	1.37524	0.0748031	0.238723	1	3458	tags=35%, list=20%, signal=44%
GO_SKELETAL_MUSCLE_ORGAN_DEVELOPMENT	GO_SKELETAL_MUSCLE_ORGAN_DEVELOPMENT		123	0.426844	1.37466	0.0292398	0.238728	1	1931	tags=23%, list=11%, signal=25%
GO_AMINOGLYCAN_CATABOLIC_PROCESS	GO_AMINOGLYCAN_CATABOLIC_PROCESS		66	0.647646	1.56339	0.0135397	0.238743	0.998	2090	tags=45%, list=12%, signal=52%
GO_NEGATIVE_REGULATION_OF_RESPONSE_TO_OXIDATIVE_STRESS	GO_NEGATIVE_REGULATION_OF_RESPONSE_TO_OXIDATIVE_STRESS		30	0.538814	1.37471	0.0555556	0.238947	1	2703	tags=37%, list=16%, signal=43%
GO_REGULATION_OF_INSULIN_LIKE_GROWTH_FACTOR_RECEPTOR_SIGNALING_PATHWAY	GO_REGULATION_OF_INSULIN_LIKE_GROWTH_FACTOR_RECEPTOR_SIGNALING_PATHWAY		20	0.62832	1.37524	0.072	0.239026	1	1429	tags=35%, list=8%, signal=38%
GO_GASTRULATION	GO_GASTRULATION		142	0.436674	1.37484	0.0371094	0.239054	1	1849	tags=23%, list=11%, signal=26%
GO_POSITIVE_REGULATION_OF_CYSTEINE_TYPE_ENDOPEPTIDASE_ACTIVITY_INVOLVED_IN_APOPTOTIC_SIGNALING_PATHWAY	GO_POSITIVE_REGULATION_OF_CYSTEINE_TYPE_ENDOPEPTIDASE_ACTIVITY_INVOLVED_IN_APOPTOTIC_SIGNALING_PATHWAY		17	0.717339	1.57436	0.00795229	0.239171	0.998	2529	tags=53%, list=15%, signal=62%
GO_REGULATION_OF_MACROPHAGE_CHEMOTAXIS	GO_REGULATION_OF_MACROPHAGE_CHEMOTAXIS		16	0.827937	1.56377	0	0.239212	0.998	1413	tags=44%, list=8%, signal=48%
GO_REGULATION_OF_EXTRINSIC_APOPTOTIC_SIGNALING_PATHWAY	GO_REGULATION_OF_EXTRINSIC_APOPTOTIC_SIGNALING_PATHWAY		147	0.566114	1.57237	0.0158416	0.239377	0.998	3244	tags=41%, list=19%, signal=51%
GO_NEGATIVE_REGULATION_OF_HYDROLASE_ACTIVITY	GO_NEGATIVE_REGULATION_OF_HYDROLASE_ACTIVITY		355	0.491866	1.57465	0	0.239949	0.998	2619	tags=28%, list=15%, signal=32%
GO_REGULATION_OF_TYROSINE_PHOSPHORYLATION_OF_STAT_PROTEIN	GO_REGULATION_OF_TYROSINE_PHOSPHORYLATION_OF_STAT_PROTEIN		67	0.565819	1.56391	0.0135397	0.240211	0.998	2602	tags=31%, list=15%, signal=37%
GO_CARBOHYDRATE_DERIVATIVE_CATABOLIC_PROCESS	GO_CARBOHYDRATE_DERIVATIVE_CATABOLIC_PROCESS		164	0.517712	1.56564	0.00197239	0.240897	0.998	2090	tags=30%, list=12%, signal=34%
GO_REGULATION_OF_INTERFERON_GAMMA_PRODUCTION	GO_REGULATION_OF_INTERFERON_GAMMA_PRODUCTION		88	0.595304	1.5705	0.0358491	0.240968	0.998	3905	tags=48%, list=23%, signal=61%
GO_REGULATION_OF_CELL_ADHESION_MEDIATED_BY_INTEGRIN	GO_REGULATION_OF_CELL_ADHESION_MEDIATED_BY_INTEGRIN		38	0.765912	1.5641	0.00191571	0.241094	0.998	1449	tags=50%, list=8%, signal=54%
GO_NEGATIVE_REGULATION_OF_DEFENSE_RESPONSE	GO_NEGATIVE_REGULATION_OF_DEFENSE_RESPONSE		128	0.522993	1.57473	0.0212355	0.241286	0.998	3521	tags=41%, list=20%, signal=51%
GO_REGULATION_OF_RESPONSE_TO_BIOTIC_STIMULUS	GO_REGULATION_OF_RESPONSE_TO_BIOTIC_STIMULUS		204	0.383625	1.37249	0.0611855	0.241441	1	2816	tags=26%, list=16%, signal=31%
GO_REGULATION_OF_T_HELPER_CELL_DIFFERENTIATION	GO_REGULATION_OF_T_HELPER_CELL_DIFFERENTIATION		26	0.530736	1.37263	0.109615	0.241555	1	1358	tags=19%, list=8%, signal=21%
GO_MACROMOLECULAR_COMPLEX_REMODELING	GO_MACROMOLECULAR_COMPLEX_REMODELING		24	0.634437	1.37156	0.0788382	0.24157	1	1703	tags=29%, list=10%, signal=32%
GO_REGULATION_OF_FIBROBLAST_MIGRATION	GO_REGULATION_OF_FIBROBLAST_MIGRATION		26	0.522753	1.37163	0.110454	0.241779	1	3868	tags=46%, list=22%, signal=59%
GO_POSITIVE_REGULATION_OF_CYTOKINE_PRODUCTION	GO_POSITIVE_REGULATION_OF_CYTOKINE_PRODUCTION		341	0.549341	1.57075	0.0227704	0.241793	0.998	2923	tags=35%, list=17%, signal=41%
GO_POSITIVE_REGULATION_OF_APOPTOTIC_SIGNALING_PATHWAY	GO_POSITIVE_REGULATION_OF_APOPTOTIC_SIGNALING_PATHWAY		160	0.483767	1.56955	0.00963391	0.241826	0.998	3354	tags=37%, list=19%, signal=45%
GO_NADP_METABOLIC_PROCESS	GO_NADP_METABOLIC_PROCESS		27	0.48437	1.37171	0.0894632	0.241959	1	2468	tags=26%, list=14%, signal=30%
GO_POSITIVE_REGULATION_OF_TRIGLYCERIDE_METABOLIC_PROCESS	GO_POSITIVE_REGULATION_OF_TRIGLYCERIDE_METABOLIC_PROCESS		20	0.514468	1.3718	0.0851064	0.242152	1	2616	tags=30%, list=15%, signal=35%
GO_REGULATION_OF_CYSTEINE_TYPE_ENDOPEPTIDASE_ACTIVITY	GO_REGULATION_OF_CYSTEINE_TYPE_ENDOPEPTIDASE_ACTIVITY		196	0.492309	1.56568	0.00772201	0.24218	0.998	3354	tags=35%, list=19%, signal=43%
GO_POSITIVE_REGULATION_OF_FIBROBLAST_PROLIFERATION	GO_POSITIVE_REGULATION_OF_FIBROBLAST_PROLIFERATION		52	0.630198	1.56425	0.0174081	0.242199	0.998	1797	tags=38%, list=10%, signal=43%
GO_NEGATIVE_REGULATION_OF_EXTRINSIC_APOPTOTIC_SIGNALING_PATHWAY_VIA_DEATH_DOMAIN_RECEPTORS	GO_NEGATIVE_REGULATION_OF_EXTRINSIC_APOPTOTIC_SIGNALING_PATHWAY_VIA_DEATH_DOMAIN_RECEPTORS		33	0.69782	1.56868	0.00990099	0.242324	0.998	2530	tags=42%, list=15%, signal=50%
GO_ERK1_AND_ERK2_CASCADE	GO_ERK1_AND_ERK2_CASCADE		22	0.687033	1.57481	0.0211132	0.242509	0.998	1710	tags=36%, list=10%, signal=40%
GO_CELLULAR_RESPONSE_TO_DEXAMETHASONE_STIMULUS	GO_CELLULAR_RESPONSE_TO_DEXAMETHASONE_STIMULUS		27	0.592377	1.37002	0.0514851	0.242676	1	1117	tags=33%, list=6%, signal=36%
GO_REGULATION_OF_PROTEIN_KINASE_B_SIGNALING	GO_REGULATION_OF_PROTEIN_KINASE_B_SIGNALING		111	0.421053	1.37061	0.0446602	0.242679	1	3095	tags=32%, list=18%, signal=38%
GO_REGULATION_OF_NEUTROPHIL_CHEMOTAXIS	GO_REGULATION_OF_NEUTROPHIL_CHEMOTAXIS		25	0.668217	1.37038	0.108216	0.242745	1	1771	tags=36%, list=10%, signal=40%
GO_TRANSITION_METAL_ION_TRANSPORT	GO_TRANSITION_METAL_ION_TRANSPORT		98	0.417691	1.37004	0.0570265	0.242951	1	3570	tags=35%, list=21%, signal=44%
GO_NEGATIVE_REGULATION_OF_MULTI_ORGANISM_PROCESS	GO_NEGATIVE_REGULATION_OF_MULTI_ORGANISM_PROCESS		135	0.569205	1.56594	0.0206767	0.24299	0.998	3521	tags=44%, list=20%, signal=55%
GO_POSITIVE_REGULATION_OF_CELL_SUBSTRATE_ADHESION	GO_POSITIVE_REGULATION_OF_CELL_SUBSTRATE_ADHESION		89	0.48926	1.36927	0.0551181	0.243209	1	2322	tags=31%, list=13%, signal=36%
GO_REGULATION_OF_INTERLEUKIN_4_PRODUCTION	GO_REGULATION_OF_INTERLEUKIN_4_PRODUCTION		25	0.58051	1.36946	0.143403	0.243232	1	2275	tags=44%, list=13%, signal=51%
GO_CELLULAR_RESPONSE_TO_INTERFERON_GAMMA	GO_CELLULAR_RESPONSE_TO_INTERFERON_GAMMA		104	0.684071	1.5664	0.0135397	0.243356	0.998	2574	tags=48%, list=15%, signal=56%
GO_ANTIGEN_PROCESSING_AND_PRESENTATION_OF_PEPTIDE_ANTIGEN_VIA_MHC_CLASS_I	GO_ANTIGEN_PROCESSING_AND_PRESENTATION_OF_PEPTIDE_ANTIGEN_VIA_MHC_CLASS_I		85	0.608526	1.57501	0.024	0.243513	0.998	3796	tags=49%, list=22%, signal=63%
GO_PROTEIN_TRIMERIZATION	GO_PROTEIN_TRIMERIZATION		36	0.682528	1.57635	0.00581395	0.243632	0.998	3194	tags=44%, list=19%, signal=54%
GO_MULTI_MULTICELLULAR_ORGANISM_PROCESS	GO_MULTI_MULTICELLULAR_ORGANISM_PROCESS		201	0.517474	1.56685	0.00389105	0.243744	0.998	1703	tags=23%, list=10%, signal=25%
GO_NEGATIVE_REGULATION_OF_IMMUNE_EFFECTOR_PROCESS	GO_NEGATIVE_REGULATION_OF_IMMUNE_EFFECTOR_PROCESS		96	0.584463	1.57537	0.0114723	0.244117	0.998	2905	tags=40%, list=17%, signal=47%
GO_IRE1_MEDIATED_UNFOLDED_PROTEIN_RESPONSE	GO_IRE1_MEDIATED_UNFOLDED_PROTEIN_RESPONSE		51	0.514929	1.56723	0.0426716	0.244347	0.998	4034	tags=49%, list=23%, signal=64%
GO_LEUKOCYTE_MEDIATED_IMMUNITY	GO_LEUKOCYTE_MEDIATED_IMMUNITY		152	0.650774	1.57635	0.00574713	0.245177	0.998	3095	tags=45%, list=18%, signal=55%
GO_OLIGOSACCHARIDE_LIPID_INTERMEDIATE_BIOSYNTHETIC_PROCESS	GO_OLIGOSACCHARIDE_LIPID_INTERMEDIATE_BIOSYNTHETIC_PROCESS		16	0.523327	1.36738	0.165354	0.245805	1	4489	tags=63%, list=26%, signal=84%
GO_NEGATIVE_REGULATION_OF_OXIDOREDUCTASE_ACTIVITY	GO_NEGATIVE_REGULATION_OF_OXIDOREDUCTASE_ACTIVITY		24	0.647489	1.57743	0.0117878	0.245934	0.998	2619	tags=38%, list=15%, signal=44%
GO_INTESTINAL_EPITHELIAL_CELL_DIFFERENTIATION	GO_INTESTINAL_EPITHELIAL_CELL_DIFFERENTIATION		16	0.696202	1.57636	0.0156556	0.246719	0.998	2100	tags=38%, list=12%, signal=43%
GO_REGULATION_OF_CELL_JUNCTION_ASSEMBLY	GO_REGULATION_OF_CELL_JUNCTION_ASSEMBLY		63	0.465966	1.36614	0.0880626	0.246794	1	3537	tags=40%, list=21%, signal=50%
GO_POSITIVE_REGULATION_OF_TISSUE_REMODELING	GO_POSITIVE_REGULATION_OF_TISSUE_REMODELING		25	0.710665	1.57774	0.00584795	0.246974	0.998	1364	tags=36%, list=8%, signal=39%
GO_LYMPHOCYTE_HOMEOSTASIS	GO_LYMPHOCYTE_HOMEOSTASIS		49	0.48588	1.36617	0.112621	0.24706	1	4080	tags=41%, list=24%, signal=53%
GO_SUBSTRATE_ADHESION_DEPENDENT_CELL_SPREADING	GO_SUBSTRATE_ADHESION_DEPENDENT_CELL_SPREADING		37	0.648891	1.57912	0.0114504	0.247162	0.998	2456	tags=41%, list=14%, signal=47%
GO_NEGATIVE_REGULATION_OF_SMOOTH_MUSCLE_CELL_PROLIFERATION	GO_NEGATIVE_REGULATION_OF_SMOOTH_MUSCLE_CELL_PROLIFERATION		35	0.560655	1.36628	0.0542169	0.247212	1	2322	tags=37%, list=13%, signal=43%
GO_REGULATION_OF_ENDOTHELIAL_CELL_APOPTOTIC_PROCESS	GO_REGULATION_OF_ENDOTHELIAL_CELL_APOPTOTIC_PROCESS		39	0.557021	1.36421	0.10297	0.247518	1	2707	tags=36%, list=16%, signal=43%
GO_REGULATION_OF_GLUCONEOGENESIS	GO_REGULATION_OF_GLUCONEOGENESIS		32	0.437372	1.36441	0.078125	0.247521	1	4219	tags=38%, list=25%, signal=50%
GO_POSITIVE_REGULATION_OF_LIPID_STORAGE	GO_POSITIVE_REGULATION_OF_LIPID_STORAGE		19	0.528911	1.36454	0.0981964	0.247679	1	2660	tags=32%, list=15%, signal=37%
GO_NEGATIVE_REGULATION_OF_VIRAL_PROCESS	GO_NEGATIVE_REGULATION_OF_VIRAL_PROCESS		82	0.627479	1.58387	0.00924214	0.247704	0.998	1853	tags=37%, list=11%, signal=41%
GO_PLACENTA_BLOOD_VESSEL_DEVELOPMENT	GO_PLACENTA_BLOOD_VESSEL_DEVELOPMENT		25	0.590351	1.5818	0.0204461	0.247756	0.998	1643	tags=28%, list=10%, signal=31%
GO_CARBOHYDRATE_HOMEOSTASIS	GO_CARBOHYDRATE_HOMEOSTASIS		158	0.36428	1.36503	0.0348361	0.247926	1	2387	tags=21%, list=14%, signal=24%
GO_REGULATION_OF_STRIATED_MUSCLE_CELL_DIFFERENTIATION	GO_REGULATION_OF_STRIATED_MUSCLE_CELL_DIFFERENTIATION		78	0.430055	1.36478	0.050813	0.247949	1	2655	tags=31%, list=15%, signal=36%
GO_NEGATIVE_REGULATION_OF_PROTEIN_MATURATION	GO_NEGATIVE_REGULATION_OF_PROTEIN_MATURATION		32	0.559176	1.36455	0.0789981	0.247965	1	3016	tags=41%, list=18%, signal=49%
GO_REGULATION_OF_TYPE_2_IMMUNE_RESPONSE	GO_REGULATION_OF_TYPE_2_IMMUNE_RESPONSE		25	0.64457	1.36375	0.113281	0.247969	1	2342	tags=48%, list=14%, signal=55%
GO_FIBRIL_ORGANIZATION	GO_FIBRIL_ORGANIZATION		19	0.696879	1.3651	0.10495	0.248128	1	2406	tags=53%, list=14%, signal=61%
GO_REGENERATION	GO_REGENERATION		150	0.568991	1.57791	0	0.248219	0.998	2592	tags=34%, list=15%, signal=40%
GO_REGULATION_OF_STEROL_TRANSPORT	GO_REGULATION_OF_STEROL_TRANSPORT		37	0.572761	1.57923	0.0286299	0.248535	0.998	2616	tags=35%, list=15%, signal=41%
GO_IMMUNE_EFFECTOR_PROCESS	GO_IMMUNE_EFFECTOR_PROCESS		420	0.59212	1.58422	0.0116279	0.24866	0.998	3163	tags=40%, list=18%, signal=48%
GO_MONOCARBOXYLIC_ACID_METABOLIC_PROCESS	GO_MONOCARBOXYLIC_ACID_METABOLIC_PROCESS		446	0.383793	1.36291	0.0501002	0.2489	1	3798	tags=33%, list=22%, signal=41%
GO_ZINC_II_ION_TRANSPORT	GO_ZINC_II_ION_TRANSPORT		26	0.503052	1.36269	0.121457	0.248946	1	3372	tags=42%, list=20%, signal=53%
GO_REGULATION_OF_RESPONSE_TO_WOUNDING	GO_REGULATION_OF_RESPONSE_TO_WOUNDING		383	0.553068	1.57958	0.00766283	0.249263	0.998	2512	tags=30%, list=15%, signal=34%
GO_POSITIVE_REGULATION_OF_FATTY_ACID_METABOLIC_PROCESS	GO_POSITIVE_REGULATION_OF_FATTY_ACID_METABOLIC_PROCESS		33	0.625592	1.58181	0.00785855	0.249403	0.998	3194	tags=36%, list=19%, signal=45%
GO_NEGATIVE_REGULATION_OF_RESPONSE_TO_REACTIVE_OXYGEN_SPECIES	GO_NEGATIVE_REGULATION_OF_RESPONSE_TO_REACTIVE_OXYGEN_SPECIES		17	0.612836	1.36172	0.0772201	0.249749	1	3201	tags=41%, list=19%, signal=51%
GO_REGULATION_OF_LYMPHOCYTE_MIGRATION	GO_REGULATION_OF_LYMPHOCYTE_MIGRATION		34	0.64398	1.36191	0.115308	0.249794	1	4108	tags=65%, list=24%, signal=85%
GO_CELLULAR_PIGMENTATION	GO_CELLULAR_PIGMENTATION		42	0.506355	1.58449	0.0136719	0.249818	0.998	3973	tags=36%, list=23%, signal=46%
GO_REGULATION_OF_EXTRACELLULAR_MATRIX_ORGANIZATION	GO_REGULATION_OF_EXTRACELLULAR_MATRIX_ORGANIZATION		25	0.587874	1.36027	0.0824742	0.249853	1	2634	tags=44%, list=15%, signal=52%
GO_CIRCULATORY_SYSTEM_PROCESS	GO_CIRCULATORY_SYSTEM_PROCESS		350	0.39635	1.36131	0.0258449	0.250076	1	2584	tags=21%, list=15%, signal=25%
GO_REGULATION_OF_CELL_SUBSTRATE_ADHESION	GO_REGULATION_OF_CELL_SUBSTRATE_ADHESION		157	0.467368	1.36031	0.0581162	0.250094	1	2322	tags=28%, list=13%, signal=32%
GO_ALCOHOL_METABOLIC_PROCESS	GO_ALCOHOL_METABOLIC_PROCESS		326	0.35366	1.36036	0.0451866	0.250303	1	2841	tags=22%, list=17%, signal=26%
GO_NEGATIVE_REGULATION_OF_EPITHELIAL_CELL_APOPTOTIC_PROCESS	GO_NEGATIVE_REGULATION_OF_EPITHELIAL_CELL_APOPTOTIC_PROCESS		35	0.540511	1.36074	0.0714286	0.250342	1	2707	tags=29%, list=16%, signal=34%
GO_ORGANIC_ACID_BIOSYNTHETIC_PROCESS	GO_ORGANIC_ACID_BIOSYNTHETIC_PROCESS		239	0.412954	1.35976	0.0423387	0.250355	1	2904	tags=28%, list=17%, signal=33%
GO_CARBOHYDRATE_PHOSPHORYLATION	GO_CARBOHYDRATE_PHOSPHORYLATION		20	0.520891	1.3595	0.134387	0.250458	1	3798	tags=40%, list=22%, signal=51%
GO_LIPOPROTEIN_METABOLIC_PROCESS	GO_LIPOPROTEIN_METABOLIC_PROCESS		120	0.364447	1.36041	0.0678295	0.250538	1	3779	tags=33%, list=22%, signal=42%
GO_NEGATIVE_REGULATION_OF_ENDOPLASMIC_RETICULUM_STRESS_INDUCED_INTRINSIC_APOPTOTIC_SIGNALING_PATHWAY	GO_NEGATIVE_REGULATION_OF_ENDOPLASMIC_RETICULUM_STRESS_INDUCED_INTRINSIC_APOPTOTIC_SIGNALING_PATHWAY		16	0.494693	1.3608	0.117878	0.250545	1	5511	tags=69%, list=32%, signal=101%
GO_LYMPHOCYTE_MEDIATED_IMMUNITY	GO_LYMPHOCYTE_MEDIATED_IMMUNITY		112	0.690283	1.5797	0.00389105	0.250683	0.998	1892	tags=38%, list=11%, signal=42%
GO_POSITIVE_REGULATION_OF_ADHERENS_JUNCTION_ORGANIZATION	GO_POSITIVE_REGULATION_OF_ADHERENS_JUNCTION_ORGANIZATION		19	0.552265	1.35907	0.0839844	0.250808	1	2183	tags=26%, list=13%, signal=30%
GO_REGULATION_OF_PROTEIN_AUTOPHOSPHORYLATION	GO_REGULATION_OF_PROTEIN_AUTOPHOSPHORYLATION		35	0.663376	1.58484	0.011583	0.250864	0.998	2301	tags=40%, list=13%, signal=46%
GO_ANTIGEN_PROCESSING_AND_PRESENTATION_OF_PEPTIDE_ANTIGEN	GO_ANTIGEN_PROCESSING_AND_PRESENTATION_OF_PEPTIDE_ANTIGEN		161	0.451142	1.3565	0.139048	0.250879	1	2615	tags=33%, list=15%, signal=38%
GO_CELLULAR_RESPONSE_TO_INTERLEUKIN_4	GO_CELLULAR_RESPONSE_TO_INTERLEUKIN_4		24	0.480355	1.35627	0.145794	0.250957	1	4832	tags=58%, list=28%, signal=81%
GO_RESPONSE_TO_ARSENIC_CONTAINING_SUBSTANCE	GO_RESPONSE_TO_ARSENIC_CONTAINING_SUBSTANCE		27	0.513347	1.35761	0.0932039	0.250967	1	2187	tags=33%, list=13%, signal=38%
GO_POSITIVE_REGULATION_OF_PROTEIN_DEACETYLATION	GO_POSITIVE_REGULATION_OF_PROTEIN_DEACETYLATION		18	0.560191	1.35722	0.146091	0.250985	1	4041	tags=44%, list=23%, signal=58%
GO_DRUG_TRANSPORT	GO_DRUG_TRANSPORT		24	0.57595	1.35678	0.100604	0.250997	1	2403	tags=29%, list=14%, signal=34%
GO_REGULATION_OF_ENDOTHELIAL_CELL_CHEMOTAXIS	GO_REGULATION_OF_ENDOTHELIAL_CELL_CHEMOTAXIS		16	0.662613	1.35583	0.0993789	0.251011	1	3004	tags=50%, list=17%, signal=61%
GO_REGULATION_OF_CYSTEINE_TYPE_ENDOPEPTIDASE_ACTIVITY_INVOLVED_IN_APOPTOTIC_SIGNALING_PATHWAY	GO_REGULATION_OF_CYSTEINE_TYPE_ENDOPEPTIDASE_ACTIVITY_INVOLVED_IN_APOPTOTIC_SIGNALING_PATHWAY		22	0.708251	1.58186	0.0155945	0.251039	0.998	2529	tags=50%, list=15%, signal=59%
GO_REGULATION_OF_SMOOTH_MUSCLE_CELL_PROLIFERATION	GO_REGULATION_OF_SMOOTH_MUSCLE_CELL_PROLIFERATION		96	0.48228	1.35697	0.0590551	0.251064	1	2436	tags=32%, list=14%, signal=37%
GO_REGULATION_OF_NEUTROPHIL_MIGRATION	GO_REGULATION_OF_NEUTROPHIL_MIGRATION		30	0.627623	1.35774	0.118	0.251089	1	1019	tags=30%, list=6%, signal=32%
GO_MATERNAL_PLACENTA_DEVELOPMENT	GO_MATERNAL_PLACENTA_DEVELOPMENT		30	0.585831	1.35869	0.107547	0.251116	1	1406	tags=30%, list=8%, signal=33%
GO_REGULATION_OF_INTERLEUKIN_10_PRODUCTION	GO_REGULATION_OF_INTERLEUKIN_10_PRODUCTION		40	0.518475	1.35652	0.166998	0.251133	1	3815	tags=50%, list=22%, signal=64%
GO_GLYCOPROTEIN_METABOLIC_PROCESS	GO_GLYCOPROTEIN_METABOLIC_PROCESS		313	0.353363	1.35731	0.0283401	0.251162	1	2823	tags=29%, list=16%, signal=35%
GO_REGULATION_OF_TOLL_LIKE_RECEPTOR_4_SIGNALING_PATHWAY	GO_REGULATION_OF_TOLL_LIKE_RECEPTOR_4_SIGNALING_PATHWAY		16	0.596581	1.35804	0.12426	0.251195	1	1663	tags=31%, list=10%, signal=35%
GO_REGULATION_OF_PH	GO_REGULATION_OF_PH		82	0.366608	1.35588	0.0788955	0.251224	1	3926	tags=29%, list=23%, signal=38%
GO_PIGMENT_CELL_DIFFERENTIATION	GO_PIGMENT_CELL_DIFFERENTIATION		24	0.561307	1.35778	0.0760234	0.251296	1	1806	tags=33%, list=10%, signal=37%
GO_TRANSFORMING_GROWTH_FACTOR_BETA_RECEPTOR_SIGNALING_PATHWAY	GO_TRANSFORMING_GROWTH_FACTOR_BETA_RECEPTOR_SIGNALING_PATHWAY		93	0.445583	1.35808	0.0681818	0.251438	1	1472	tags=20%, list=9%, signal=22%
GO_REGULATION_OF_METANEPHROS_DEVELOPMENT	GO_REGULATION_OF_METANEPHROS_DEVELOPMENT		22	0.597575	1.35534	0.136719	0.251468	1	1810	tags=32%, list=11%, signal=36%
GO_REGULATION_OF_GLYCOPROTEIN_METABOLIC_PROCESS	GO_REGULATION_OF_GLYCOPROTEIN_METABOLIC_PROCESS		38	0.476829	1.35821	0.0757282	0.251568	1	2827	tags=26%, list=16%, signal=31%
GO_PLATELET_MORPHOGENESIS	GO_PLATELET_MORPHOGENESIS		18	0.594261	1.58512	0.0275591	0.251798	0.998	2162	tags=33%, list=13%, signal=38%
GO_POSITIVE_REGULATION_OF_PROTEIN_KINASE_B_SIGNALING	GO_POSITIVE_REGULATION_OF_PROTEIN_KINASE_B_SIGNALING		74	0.466531	1.35385	0.0581395	0.252259	1	3053	tags=34%, list=18%, signal=41%
GO_ESTROUS_CYCLE	GO_ESTROUS_CYCLE		19	0.630417	1.35464	0.0957031	0.25226	1	3479	tags=47%, list=20%, signal=59%
GO_POSITIVE_CHEMOTAXIS	GO_POSITIVE_CHEMOTAXIS		31	0.555305	1.35433	0.082495	0.252389	1	4017	tags=45%, list=23%, signal=59%
GO_NEGATIVE_REGULATION_OF_MACROAUTOPHAGY	GO_NEGATIVE_REGULATION_OF_MACROAUTOPHAGY		19	0.519678	1.35388	0.173489	0.252523	1	4741	tags=63%, list=28%, signal=87%
GO_MAINTENANCE_OF_PROTEIN_LOCALIZATION_IN_ORGANELLE	GO_MAINTENANCE_OF_PROTEIN_LOCALIZATION_IN_ORGANELLE		29	0.472011	1.35391	0.118095	0.252765	1	1800	tags=28%, list=10%, signal=31%
GO_RESPONSE_TO_MOLECULE_OF_BACTERIAL_ORIGIN	GO_RESPONSE_TO_MOLECULE_OF_BACTERIAL_ORIGIN		307	0.601193	1.58526	0.00383877	0.253224	0.998	2202	tags=35%, list=13%, signal=39%
GO_BROWN_FAT_CELL_DIFFERENTIATION	GO_BROWN_FAT_CELL_DIFFERENTIATION		27	0.680023	1.58578	0.00584795	0.253855	0.998	2648	tags=37%, list=15%, signal=44%
GO_PIGMENT_GRANULE_ORGANIZATION	GO_PIGMENT_GRANULE_ORGANIZATION		19	0.482747	1.35183	0.104247	0.255091	1	5106	tags=47%, list=30%, signal=67%
GO_CELL_SUBSTRATE_ADHESION	GO_CELL_SUBSTRATE_ADHESION		154	0.559748	1.58606	0.00583658	0.25518	0.998	3052	tags=40%, list=18%, signal=48%
GO_ORGAN_OR_TISSUE_SPECIFIC_IMMUNE_RESPONSE	GO_ORGAN_OR_TISSUE_SPECIFIC_IMMUNE_RESPONSE		17	0.565374	1.35157	0.134831	0.255192	1	3992	tags=35%, list=23%, signal=46%
GO_REGULATION_OF_RENAL_SODIUM_EXCRETION	GO_REGULATION_OF_RENAL_SODIUM_EXCRETION		23	0.493229	1.35119	0.102273	0.255488	1	4183	tags=30%, list=24%, signal=40%
GO_TETRAHYDROFOLATE_METABOLIC_PROCESS	GO_TETRAHYDROFOLATE_METABOLIC_PROCESS		17	0.565053	1.35067	0.0924855	0.255679	1	2877	tags=35%, list=17%, signal=42%
GO_PLACENTA_DEVELOPMENT	GO_PLACENTA_DEVELOPMENT		132	0.513092	1.58888	0.00589391	0.255757	0.998	2211	tags=27%, list=13%, signal=30%
GO_AXIS_ELONGATION	GO_AXIS_ELONGATION		25	0.617265	1.3508	0.0745098	0.255775	1	1737	tags=36%, list=10%, signal=40%
GO_POLYSACCHARIDE_BIOSYNTHETIC_PROCESS	GO_POLYSACCHARIDE_BIOSYNTHETIC_PROCESS		38	0.541912	1.58654	0.0153846	0.255982	0.998	3662	tags=42%, list=21%, signal=53%
GO_REGULATION_OF_GRANULOCYTE_MACROPHAGE_COLONY_STIMULATING_FACTOR_PRODUCTION	GO_REGULATION_OF_GRANULOCYTE_MACROPHAGE_COLONY_STIMULATING_FACTOR_PRODUCTION		15	0.671711	1.34925	0.102362	0.256154	1	3694	tags=53%, list=21%, signal=68%
GO_HOMOTYPIC_CELL_CELL_ADHESION	GO_HOMOTYPIC_CELL_CELL_ADHESION		46	0.511747	1.34905	0.0939335	0.256232	1	2387	tags=37%, list=14%, signal=43%
GO_NEGATIVE_REGULATION_OF_BLOOD_PRESSURE	GO_NEGATIVE_REGULATION_OF_BLOOD_PRESSURE		42	0.414968	1.34995	0.116981	0.256245	1	4183	tags=36%, list=24%, signal=47%
GO_REGULATION_OF_GLUCOSE_METABOLIC_PROCESS	GO_REGULATION_OF_GLUCOSE_METABOLIC_PROCESS		93	0.400662	1.3501	0.0457256	0.256326	1	4219	tags=39%, list=25%, signal=51%
GO_REVERSE_CHOLESTEROL_TRANSPORT	GO_REVERSE_CHOLESTEROL_TRANSPORT		17	0.598673	1.34927	0.12	0.256426	1	2167	tags=29%, list=13%, signal=34%
GO_RESPONSE_TO_FOOD	GO_RESPONSE_TO_FOOD		19	0.473921	1.34942	0.101167	0.256484	1	2376	tags=26%, list=14%, signal=30%
GO_REGULATION_OF_SMOOTH_MUSCLE_CONTRACTION	GO_REGULATION_OF_SMOOTH_MUSCLE_CONTRACTION		56	0.499446	1.34959	0.0777096	0.256539	1	2205	tags=25%, list=13%, signal=29%
GO_INFLAMMATORY_RESPONSE	GO_INFLAMMATORY_RESPONSE		422	0.599714	1.587	0.0094162	0.256784	0.998	2910	tags=37%, list=17%, signal=43%
GO_RESPONSE_TO_WATER	GO_RESPONSE_TO_WATER		17	0.624395	1.5877	0.0154739	0.256968	0.998	1643	tags=29%, list=10%, signal=32%
GO_IMMUNOGLOBULIN_PRODUCTION_INVOLVED_IN_IMMUNOGLOBULIN_MEDIATED_IMMUNE_RESPONSE	GO_IMMUNOGLOBULIN_PRODUCTION_INVOLVED_IN_IMMUNOGLOBULIN_MEDIATED_IMMUNE_RESPONSE		20	0.678772	1.58917	0.0149533	0.257045	0.998	2846	tags=30%, list=17%, signal=36%
GO_RESPONSE_TO_INTERFERON_GAMMA	GO_RESPONSE_TO_INTERFERON_GAMMA		125	0.695605	1.58954	0.00963391	0.258112	0.998	2574	tags=50%, list=15%, signal=58%
GO_B_CELL_PROLIFERATION	GO_B_CELL_PROLIFERATION		32	0.584025	1.59034	0.0299065	0.258128	0.998	2707	tags=28%, list=16%, signal=33%
GO_POSITIVE_REGULATION_OF_SEQUENCE_SPECIFIC_DNA_BINDING_TRANSCRIPTION_FACTOR_ACTIVITY	GO_POSITIVE_REGULATION_OF_SEQUENCE_SPECIFIC_DNA_BINDING_TRANSCRIPTION_FACTOR_ACTIVITY		215	0.385815	1.34758	0.054	0.258168	1	2910	tags=28%, list=17%, signal=34%
GO_REGULATION_OF_SUPEROXIDE_METABOLIC_PROCESS	GO_REGULATION_OF_SUPEROXIDE_METABOLIC_PROCESS		21	0.664207	1.34699	0.0856031	0.25879	1	1703	tags=43%, list=10%, signal=48%
GO_NEGATIVE_REGULATION_OF_RESPONSE_TO_BIOTIC_STIMULUS	GO_NEGATIVE_REGULATION_OF_RESPONSE_TO_BIOTIC_STIMULUS		26	0.653039	1.59062	0.0135922	0.259537	0.998	2141	tags=42%, list=12%, signal=48%
GO_NEGATIVE_REGULATION_OF_CELL_ACTIVATION	GO_NEGATIVE_REGULATION_OF_CELL_ACTIVATION		144	0.556956	1.59216	0.0135659	0.259697	0.998	3095	tags=39%, list=18%, signal=47%
GO_NEGATIVE_REGULATION_OF_ERK1_AND_ERK2_CASCADE	GO_NEGATIVE_REGULATION_OF_ERK1_AND_ERK2_CASCADE		50	0.512788	1.34607	0.0875486	0.259801	1	3743	tags=46%, list=22%, signal=59%
GO_POSITIVE_REGULATION_OF_ADAPTIVE_IMMUNE_RESPONSE	GO_POSITIVE_REGULATION_OF_ADAPTIVE_IMMUNE_RESPONSE		68	0.468889	1.34577	0.132554	0.259969	1	3026	tags=31%, list=18%, signal=37%
GO_NEGATIVE_REGULATION_OF_INTRINSIC_APOPTOTIC_SIGNALING_PATHWAY	GO_NEGATIVE_REGULATION_OF_INTRINSIC_APOPTOTIC_SIGNALING_PATHWAY		80	0.38905	1.34532	0.08413	0.260112	1	4385	tags=41%, list=25%, signal=55%
GO_HEPATICOBILIARY_SYSTEM_DEVELOPMENT	GO_HEPATICOBILIARY_SYSTEM_DEVELOPMENT		124	0.412471	1.34536	0.0491493	0.260333	1	2033	tags=23%, list=12%, signal=25%
GO_T_CELL_DIFFERENTIATION_INVOLVED_IN_IMMUNE_RESPONSE	GO_T_CELL_DIFFERENTIATION_INVOLVED_IN_IMMUNE_RESPONSE		29	0.522279	1.34476	0.145068	0.260657	1	2199	tags=24%, list=13%, signal=28%
GO_ACTIN_CYTOSKELETON_REORGANIZATION	GO_ACTIN_CYTOSKELETON_REORGANIZATION		53	0.450215	1.3437	0.0629921	0.260728	1	1204	tags=23%, list=7%, signal=24%
GO_REGULATION_OF_WOUND_HEALING	GO_REGULATION_OF_WOUND_HEALING		122	0.59934	1.59092	0.00579151	0.260747	0.998	1663	tags=29%, list=10%, signal=32%
GO_PARTURITION	GO_PARTURITION		19	0.619774	1.34448	0.0933063	0.260779	1	3678	tags=47%, list=21%, signal=60%
GO_POSITIVE_REGULATION_OF_ERBB_SIGNALING_PATHWAY	GO_POSITIVE_REGULATION_OF_ERBB_SIGNALING_PATHWAY		32	0.444028	1.34427	0.0874752	0.260805	1	2676	tags=25%, list=16%, signal=30%
GO_ZINC_ION_HOMEOSTASIS	GO_ZINC_ION_HOMEOSTASIS		20	0.5944	1.34375	0.100971	0.260966	1	3501	tags=60%, list=20%, signal=75%
GO_RESPONSE_TO_CAFFEINE	GO_RESPONSE_TO_CAFFEINE		16	0.585331	1.34383	0.0816733	0.261146	1	2192	tags=31%, list=13%, signal=36%
GO_ADAPTIVE_IMMUNE_RESPONSE	GO_ADAPTIVE_IMMUNE_RESPONSE		244	0.600836	1.59221	0.0196078	0.261621	0.998	3095	tags=36%, list=18%, signal=43%
GO_SUBSTRATE_DEPENDENT_CELL_MIGRATION	GO_SUBSTRATE_DEPENDENT_CELL_MIGRATION		24	0.596409	1.34267	0.122244	0.262124	1	3614	tags=46%, list=21%, signal=58%
GO_POSITIVE_REGULATION_OF_PROTEIN_CATABOLIC_PROCESS	GO_POSITIVE_REGULATION_OF_PROTEIN_CATABOLIC_PROCESS		242	0.363082	1.34242	0.0667976	0.262188	1	4355	tags=35%, list=25%, signal=46%
GO_CELLULAR_RESPONSE_TO_CORTICOSTEROID_STIMULUS	GO_CELLULAR_RESPONSE_TO_CORTICOSTEROID_STIMULUS		55	0.489123	1.34033	0.0567515	0.262704	1	1117	tags=22%, list=6%, signal=23%
GO_VIRAL_LIFE_CYCLE	GO_VIRAL_LIFE_CYCLE		232	0.324205	1.34054	0.108949	0.262711	1	3244	tags=20%, list=19%, signal=24%
GO_ER_ASSOCIATED_UBIQUITIN_DEPENDENT_PROTEIN_CATABOLIC_PROCESS	GO_ER_ASSOCIATED_UBIQUITIN_DEPENDENT_PROTEIN_CATABOLIC_PROCESS		56	0.380701	1.34111	0.128364	0.262729	1	4828	tags=46%, list=28%, signal=64%
GO_POSITIVE_REGULATION_OF_MUSCLE_CELL_DIFFERENTIATION	GO_POSITIVE_REGULATION_OF_MUSCLE_CELL_DIFFERENTIATION		80	0.38559	1.34126	0.0461216	0.262779	1	2931	tags=28%, list=17%, signal=33%
GO_RESPONSE_TO_TOXIC_SUBSTANCE	GO_RESPONSE_TO_TOXIC_SUBSTANCE		221	0.410636	1.34085	0.0476191	0.26286	1	3028	tags=28%, list=18%, signal=34%
GO_NEGATIVE_REGULATION_OF_I_KAPPAB_KINASE_NF_KAPPAB_SIGNALING	GO_NEGATIVE_REGULATION_OF_I_KAPPAB_KINASE_NF_KAPPAB_SIGNALING		47	0.419699	1.34065	0.100592	0.26286	1	2923	tags=34%, list=17%, signal=41%
GO_REGULATION_OF_LYMPHOCYTE_APOPTOTIC_PROCESS	GO_REGULATION_OF_LYMPHOCYTE_APOPTOTIC_PROCESS		52	0.480693	1.34135	0.122807	0.262943	1	4080	tags=42%, list=24%, signal=55%
GO_ACTIVATION_OF_PROTEIN_KINASE_ACTIVITY	GO_ACTIVATION_OF_PROTEIN_KINASE_ACTIVITY		261	0.363472	1.34175	0.0378486	0.262948	1	2619	tags=22%, list=15%, signal=26%
GO_NEGATIVE_REGULATION_OF_T_CELL_DIFFERENTIATION	GO_NEGATIVE_REGULATION_OF_T_CELL_DIFFERENTIATION		28	0.614039	1.59247	0.0214425	0.263126	0.998	2383	tags=32%, list=14%, signal=37%
GO_REGULATION_OF_SPROUTING_ANGIOGENESIS	GO_REGULATION_OF_SPROUTING_ANGIOGENESIS		28	0.520742	1.34142	0.0934959	0.26314	1	1449	tags=25%, list=8%, signal=27%
GO_NEGATIVE_REGULATION_OF_PRODUCTION_OF_MOLECULAR_MEDIATOR_OF_IMMUNE_RESPONSE	GO_NEGATIVE_REGULATION_OF_PRODUCTION_OF_MOLECULAR_MEDIATOR_OF_IMMUNE_RESPONSE		28	0.694696	1.5942	0.00764818	0.263191	0.997	2905	tags=43%, list=17%, signal=51%
GO_COFACTOR_METABOLIC_PROCESS	GO_COFACTOR_METABOLIC_PROCESS		297	0.342746	1.33917	0.0596708	0.263541	1	3059	tags=26%, list=18%, signal=31%
GO_ORGANIC_HYDROXY_COMPOUND_BIOSYNTHETIC_PROCESS	GO_ORGANIC_HYDROXY_COMPOUND_BIOSYNTHETIC_PROCESS		162	0.385844	1.33928	0.046371	0.263678	1	3129	tags=25%, list=18%, signal=31%
GO_RESPONSE_TO_MAGNESIUM_ION	GO_RESPONSE_TO_MAGNESIUM_ION		22	0.601544	1.33885	0.062249	0.263756	1	1073	tags=36%, list=6%, signal=39%
GO_NEGATIVE_REGULATION_OF_VIRAL_ENTRY_INTO_HOST_CELL	GO_NEGATIVE_REGULATION_OF_VIRAL_ENTRY_INTO_HOST_CELL		18	0.698421	1.59306	0.0231214	0.263839	0.998	1300	tags=33%, list=8%, signal=36%
GO_REGULATION_OF_TRANSCRIPTION_FACTOR_IMPORT_INTO_NUCLEUS	GO_REGULATION_OF_TRANSCRIPTION_FACTOR_IMPORT_INTO_NUCLEUS		88	0.416934	1.33935	0.0770751	0.263864	1	3041	tags=33%, list=18%, signal=40%
GO_PYRIMIDINE_RIBONUCLEOTIDE_METABOLIC_PROCESS	GO_PYRIMIDINE_RIBONUCLEOTIDE_METABOLIC_PROCESS		21	0.441097	1.33816	0.105364	0.263934	1	937	tags=10%, list=5%, signal=10%
GO_PROTEIN_OLIGOMERIZATION	GO_PROTEIN_OLIGOMERIZATION		378	0.335731	1.33823	0.0208333	0.264122	1	2910	tags=25%, list=17%, signal=29%
GO_REGULATION_OF_PHOSPHOLIPASE_ACTIVITY	GO_REGULATION_OF_PHOSPHOLIPASE_ACTIVITY		61	0.514463	1.33762	0.0821918	0.264186	1	3646	tags=48%, list=21%, signal=60%
GO_POSITIVE_REGULATION_OF_BLOOD_CIRCULATION	GO_POSITIVE_REGULATION_OF_BLOOD_CIRCULATION		91	0.457149	1.33723	0.0730223	0.264215	1	1703	tags=21%, list=10%, signal=23%
GO_MACROPHAGE_DIFFERENTIATION	GO_MACROPHAGE_DIFFERENTIATION		19	0.544745	1.33774	0.10687	0.264298	1	1852	tags=37%, list=11%, signal=41%
GO_MYELOID_DENDRITIC_CELL_ACTIVATION	GO_MYELOID_DENDRITIC_CELL_ACTIVATION		25	0.578664	1.33729	0.15261	0.264385	1	2057	tags=40%, list=12%, signal=45%
GO_PLASMA_LIPOPROTEIN_PARTICLE_CLEARANCE	GO_PLASMA_LIPOPROTEIN_PARTICLE_CLEARANCE		21	0.565904	1.33824	0.0989899	0.264409	1	2159	tags=33%, list=13%, signal=38%
GO_NEGATIVE_REGULATION_OF_INTERFERON_GAMMA_PRODUCTION	GO_NEGATIVE_REGULATION_OF_INTERFERON_GAMMA_PRODUCTION		31	0.606417	1.59537	0.0330097	0.26443	0.996	2816	tags=42%, list=16%, signal=50%
GO_NEUTROPHIL_MEDIATED_IMMUNITY	GO_NEUTROPHIL_MEDIATED_IMMUNITY		20	0.664112	1.3367	0.13308	0.26445	1	3502	tags=50%, list=20%, signal=63%
GO_TISSUE_REGENERATION	GO_TISSUE_REGENERATION		46	0.497125	1.33679	0.071291	0.264606	1	2768	tags=33%, list=16%, signal=39%
GO_EPITHELIAL_TUBE_BRANCHING_INVOLVED_IN_LUNG_MORPHOGENESIS	GO_EPITHELIAL_TUBE_BRANCHING_INVOLVED_IN_LUNG_MORPHOGENESIS		25	0.627328	1.33581	0.0632184	0.264614	1	3365	tags=60%, list=20%, signal=74%
GO_POSITIVE_REGULATION_OF_CELLULAR_PROTEIN_CATABOLIC_PROCESS	GO_POSITIVE_REGULATION_OF_CELLULAR_PROTEIN_CATABOLIC_PROCESS		175	0.384971	1.33583	0.106383	0.264878	1	3569	tags=28%, list=21%, signal=35%
GO_RESPONSE_TO_ACIDIC_PH	GO_RESPONSE_TO_ACIDIC_PH		16	0.625733	1.33522	0.132184	0.264896	1	3470	tags=50%, list=20%, signal=63%
GO_SULFUR_COMPOUND_METABOLIC_PROCESS	GO_SULFUR_COMPOUND_METABOLIC_PROCESS		322	0.374728	1.33536	0.0456349	0.265009	1	3713	tags=36%, list=22%, signal=45%
GO_ORGANIC_HYDROXY_COMPOUND_TRANSPORT	GO_ORGANIC_HYDROXY_COMPOUND_TRANSPORT		141	0.408006	1.3359	0.0669371	0.265082	1	2792	tags=26%, list=16%, signal=30%
GO_DEFENSE_RESPONSE_TO_VIRUS	GO_DEFENSE_RESPONSE_TO_VIRUS		142	0.662327	1.59426	0.0133843	0.265176	0.997	2910	tags=45%, list=17%, signal=54%
GO_MODIFIED_AMINO_ACID_TRANSPORT	GO_MODIFIED_AMINO_ACID_TRANSPORT		25	0.544003	1.33596	0.10978	0.265288	1	4437	tags=40%, list=26%, signal=54%
GO_TISSUE_REMODELING	GO_TISSUE_REMODELING		85	0.596879	1.59568	0.00572519	0.26583	0.996	3479	tags=41%, list=20%, signal=51%
GO_REGULATION_OF_ANTIGEN_RECEPTOR_MEDIATED_SIGNALING_PATHWAY	GO_REGULATION_OF_ANTIGEN_RECEPTOR_MEDIATED_SIGNALING_PATHWAY		36	0.543467	1.33445	0.143126	0.265847	1	2376	tags=36%, list=14%, signal=42%
GO_B_CELL_HOMEOSTASIS	GO_B_CELL_HOMEOSTASIS		20	0.580481	1.33355	0.145418	0.266075	1	2529	tags=30%, list=15%, signal=35%
GO_ENDOCYTIC_RECYCLING	GO_ENDOCYTIC_RECYCLING		22	0.426036	1.3341	0.127907	0.266102	1	3325	tags=32%, list=19%, signal=39%
GO_MEMBRANE_INVAGINATION	GO_MEMBRANE_INVAGINATION		33	0.609356	1.33359	0.115079	0.266303	1	3569	tags=61%, list=21%, signal=76%
GO_MORPHOGENESIS_OF_A_BRANCHING_STRUCTURE	GO_MORPHOGENESIS_OF_A_BRANCHING_STRUCTURE		161	0.444051	1.33369	0.0511811	0.26645	1	3473	tags=40%, list=20%, signal=50%
GO_LEUKOCYTE_MEDIATED_CYTOTOXICITY	GO_LEUKOCYTE_MEDIATED_CYTOTOXICITY		29	0.678874	1.60148	0.00764818	0.266837	0.995	2670	tags=41%, list=16%, signal=49%
GO_REGULATION_OF_T_HELPER_1_TYPE_IMMUNE_RESPONSE	GO_REGULATION_OF_T_HELPER_1_TYPE_IMMUNE_RESPONSE		22	0.68612	1.59569	0.0169811	0.267987	0.996	2037	tags=27%, list=12%, signal=31%
GO_G_PROTEIN_COUPLED_PURINERGIC_RECEPTOR_SIGNALING_PATHWAY	GO_G_PROTEIN_COUPLED_PURINERGIC_RECEPTOR_SIGNALING_PATHWAY		18	0.657303	1.33178	0.142574	0.268293	1	3654	tags=61%, list=21%, signal=78%
GO_REGULATION_OF_MAP_KINASE_ACTIVITY	GO_REGULATION_OF_MAP_KINASE_ACTIVITY		300	0.372569	1.3318	0.042	0.268571	1	3637	tags=32%, list=21%, signal=40%
GO_POSITIVE_REGULATION_OF_T_CELL_PROLIFERATION	GO_POSITIVE_REGULATION_OF_T_CELL_PROLIFERATION		91	0.642601	1.59879	0.0304183	0.26882	0.995	2737	tags=37%, list=16%, signal=44%
GO_NEGATIVE_REGULATION_OF_LOCOMOTION	GO_NEGATIVE_REGULATION_OF_LOCOMOTION		246	0.413069	1.33122	0.0507099	0.268877	1	2640	tags=28%, list=15%, signal=33%
GO_REGULATION_OF_ISOTYPE_SWITCHING	GO_REGULATION_OF_ISOTYPE_SWITCHING		22	0.575904	1.60161	0.0271845	0.268976	0.995	5409	tags=59%, list=31%, signal=86%
GO_NEGATIVE_REGULATION_OF_CYTOKINE_SECRETION	GO_NEGATIVE_REGULATION_OF_CYTOKINE_SECRETION		41	0.655974	1.59614	0.011583	0.269055	0.996	3311	tags=44%, list=19%, signal=54%
GO_POSITIVE_REGULATION_OF_LEUKOCYTE_PROLIFERATION	GO_POSITIVE_REGULATION_OF_LEUKOCYTE_PROLIFERATION		130	0.618375	1.5996	0.0213178	0.269222	0.995	2744	tags=35%, list=16%, signal=42%
GO_RESPONSE_TO_TRANSFORMING_GROWTH_FACTOR_BETA	GO_RESPONSE_TO_TRANSFORMING_GROWTH_FACTOR_BETA		141	0.450153	1.33061	0.0857143	0.269442	1	1472	tags=22%, list=9%, signal=24%
GO_CHRONIC_INFLAMMATORY_RESPONSE	GO_CHRONIC_INFLAMMATORY_RESPONSE		15	0.745985	1.3299	0.102204	0.27001	1	2949	tags=67%, list=17%, signal=80%
GO_RESPONSE_TO_ESTRADIOL	GO_RESPONSE_TO_ESTRADIOL		140	0.436584	1.32969	0.0472441	0.270012	1	3134	tags=31%, list=18%, signal=37%
GO_NEGATIVE_REGULATION_OF_ADAPTIVE_IMMUNE_RESPONSE	GO_NEGATIVE_REGULATION_OF_ADAPTIVE_IMMUNE_RESPONSE		35	0.487618	1.33001	0.167286	0.2701	1	2816	tags=31%, list=16%, signal=38%
GO_POSITIVE_REGULATION_OF_REPRODUCTIVE_PROCESS	GO_POSITIVE_REGULATION_OF_REPRODUCTIVE_PROCESS		50	0.439041	1.32917	0.0665362	0.270544	1	2202	tags=24%, list=13%, signal=27%
GO_REGULATION_OF_VASCULAR_ENDOTHELIAL_GROWTH_FACTOR_RECEPTOR_SIGNALING_PATHWAY	GO_REGULATION_OF_VASCULAR_ENDOTHELIAL_GROWTH_FACTOR_RECEPTOR_SIGNALING_PATHWAY		25	0.554342	1.32855	0.083004	0.270626	1	1340	tags=32%, list=8%, signal=35%
GO_CHONDROITIN_SULFATE_PROTEOGLYCAN_METABOLIC_PROCESS	GO_CHONDROITIN_SULFATE_PROTEOGLYCAN_METABOLIC_PROCESS		41	0.513329	1.32873	0.0606654	0.270647	1	1838	tags=41%, list=11%, signal=46%
GO_ALPHA_BETA_T_CELL_DIFFERENTIATION	GO_ALPHA_BETA_T_CELL_DIFFERENTIATION		45	0.47687	1.32752	0.146435	0.270706	1	2199	tags=22%, list=13%, signal=25%
GO_RESPONSE_TO_CAMP	GO_RESPONSE_TO_CAMP		101	0.43245	1.32889	0.0954199	0.270706	1	2347	tags=24%, list=14%, signal=27%
GO_REGULATION_OF_LIPID_TRANSPORT	GO_REGULATION_OF_LIPID_TRANSPORT		90	0.39935	1.32824	0.0758197	0.270776	1	2616	tags=27%, list=15%, signal=31%
GO_REGULATION_OF_CELL_KILLING	GO_REGULATION_OF_CELL_KILLING		59	0.463938	1.32801	0.142582	0.270846	1	4064	tags=42%, list=24%, signal=55%
GO_TISSUE_HOMEOSTASIS	GO_TISSUE_HOMEOSTASIS		153	0.36663	1.32685	0.0595238	0.270856	1	3674	tags=27%, list=21%, signal=35%
GO_BRANCHING_INVOLVED_IN_SALIVARY_GLAND_MORPHOGENESIS	GO_BRANCHING_INVOLVED_IN_SALIVARY_GLAND_MORPHOGENESIS		16	0.756672	1.60178	0.0039604	0.270868	0.995	3004	tags=63%, list=17%, signal=76%
GO_LIPID_BIOSYNTHETIC_PROCESS	GO_LIPID_BIOSYNTHETIC_PROCESS		480	0.330738	1.32758	0.0404858	0.27092	1	3103	tags=22%, list=18%, signal=26%
GO_POSITIVE_REGULATION_OF_CYTOKINE_PRODUCTION_INVOLVED_IN_IMMUNE_RESPONSE	GO_POSITIVE_REGULATION_OF_CYTOKINE_PRODUCTION_INVOLVED_IN_IMMUNE_RESPONSE		29	0.586745	1.32718	0.121951	0.270922	1	2910	tags=48%, list=17%, signal=58%
GO_NEGATIVE_REGULATION_OF_BIOMINERAL_TISSUE_DEVELOPMENT	GO_NEGATIVE_REGULATION_OF_BIOMINERAL_TISSUE_DEVELOPMENT		16	0.609041	1.32688	0.117172	0.271109	1	2387	tags=44%, list=14%, signal=51%
GO_REGULATION_OF_ENDOPLASMIC_RETICULUM_UNFOLDED_PROTEIN_RESPONSE	GO_REGULATION_OF_ENDOPLASMIC_RETICULUM_UNFOLDED_PROTEIN_RESPONSE		25	0.418192	1.32758	0.139048	0.271208	1	4068	tags=44%, list=24%, signal=58%
GO_POSITIVE_REGULATION_OF_RESPONSE_TO_CYTOKINE_STIMULUS	GO_POSITIVE_REGULATION_OF_RESPONSE_TO_CYTOKINE_STIMULUS		29	0.623005	1.59617	0.00756144	0.271284	0.996	4238	tags=62%, list=25%, signal=82%
GO_T_CELL_APOPTOTIC_PROCESS	GO_T_CELL_APOPTOTIC_PROCESS		15	0.698813	1.60339	0.0136986	0.271353	0.995	3662	tags=60%, list=21%, signal=76%
GO_FATTY_ACID_BIOSYNTHETIC_PROCESS	GO_FATTY_ACID_BIOSYNTHETIC_PROCESS		96	0.423122	1.32607	0.0943026	0.271764	1	3251	tags=29%, list=19%, signal=36%
GO_NATURAL_KILLER_CELL_MEDIATED_IMMUNITY	GO_NATURAL_KILLER_CELL_MEDIATED_IMMUNITY		19	0.652475	1.60487	0.00750469	0.271998	0.995	2465	tags=37%, list=14%, signal=43%
GO_VESICLE_TARGETING	GO_VESICLE_TARGETING		73	0.41431	1.32554	0.126506	0.272004	1	3360	tags=33%, list=20%, signal=41%
GO_MEMBRANE_LIPID_METABOLIC_PROCESS	GO_MEMBRANE_LIPID_METABOLIC_PROCESS		159	0.363538	1.32407	0.0761317	0.272013	1	3103	tags=30%, list=18%, signal=36%
GO_COBALAMIN_METABOLIC_PROCESS	GO_COBALAMIN_METABOLIC_PROCESS		18	0.509983	1.59663	0.0299401	0.272188	0.996	5290	tags=56%, list=31%, signal=80%
GO_REGULATION_OF_INTERFERON_ALPHA_PRODUCTION	GO_REGULATION_OF_INTERFERON_ALPHA_PRODUCTION		17	0.730882	1.32506	0.145068	0.272216	1	2785	tags=65%, list=16%, signal=77%
GO_REGULATION_OF_MYELOID_CELL_APOPTOTIC_PROCESS	GO_REGULATION_OF_MYELOID_CELL_APOPTOTIC_PROCESS		22	0.577988	1.32558	0.120921	0.272219	1	1366	tags=27%, list=8%, signal=30%
GO_RESPONSE_TO_PEPTIDE	GO_RESPONSE_TO_PEPTIDE		380	0.347024	1.32483	0.0332681	0.272271	1	3704	tags=29%, list=22%, signal=36%
GO_REGULATION_OF_KERATINOCYTE_PROLIFERATION	GO_REGULATION_OF_KERATINOCYTE_PROLIFERATION		26	0.529461	1.32407	0.113546	0.272294	1	1441	tags=23%, list=8%, signal=25%
GO_LYMPHOCYTE_APOPTOTIC_PROCESS	GO_LYMPHOCYTE_APOPTOTIC_PROCESS		18	0.656346	1.60208	0.0220884	0.272374	0.995	3662	tags=50%, list=21%, signal=63%
GO_DOPAMINE_METABOLIC_PROCESS	GO_DOPAMINE_METABOLIC_PROCESS		24	0.578968	1.32509	0.122288	0.272461	1	559	tags=17%, list=3%, signal=17%
GO_EPITHELIAL_CELL_DIFFERENTIATION	GO_EPITHELIAL_CELL_DIFFERENTIATION		441	0.360881	1.32408	0.034	0.272581	1	2301	tags=22%, list=13%, signal=24%
GO_NUCLEOSIDE_PHOSPHATE_BIOSYNTHETIC_PROCESS	GO_NUCLEOSIDE_PHOSPHATE_BIOSYNTHETIC_PROCESS		140	0.382136	1.32419	0.0638298	0.272703	1	3064	tags=26%, list=18%, signal=31%
GO_VACUOLAR_ACIDIFICATION	GO_VACUOLAR_ACIDIFICATION		15	0.52341	1.3231	0.157895	0.272868	1	3926	tags=60%, list=23%, signal=78%
GO_REGULATION_OF_SEQUENCE_SPECIFIC_DNA_BINDING_TRANSCRIPTION_FACTOR_ACTIVITY	GO_REGULATION_OF_SEQUENCE_SPECIFIC_DNA_BINDING_TRANSCRIPTION_FACTOR_ACTIVITY		339	0.36439	1.3242	0.0547945	0.272971	1	2630	tags=24%, list=15%, signal=27%
GO_REGULATION_OF_CIRCADIAN_SLEEP_WAKE_CYCLE	GO_REGULATION_OF_CIRCADIAN_SLEEP_WAKE_CYCLE		24	0.435208	1.32314	0.111332	0.273103	1	1940	tags=17%, list=11%, signal=19%
GO_POSITIVE_REGULATION_OF_PEPTIDYL_TYROSINE_PHOSPHORYLATION	GO_POSITIVE_REGULATION_OF_PEPTIDYL_TYROSINE_PHOSPHORYLATION		154	0.421514	1.32222	0.0879541	0.273126	1	3201	tags=30%, list=19%, signal=36%
GO_LONG_CHAIN_FATTY_ACID_METABOLIC_PROCESS	GO_LONG_CHAIN_FATTY_ACID_METABOLIC_PROCESS		83	0.461739	1.32232	0.104839	0.273273	1	3466	tags=37%, list=20%, signal=47%
GO_MULTICELLULAR_ORGANISMAL_MACROMOLECULE_METABOLIC_PROCESS	GO_MULTICELLULAR_ORGANISMAL_MACROMOLECULE_METABOLIC_PROCESS		69	0.619016	1.32186	0.152642	0.2734	1	2336	tags=49%, list=14%, signal=57%
GO_POSITIVE_REGULATION_OF_ENDOTHELIAL_CELL_MIGRATION	GO_POSITIVE_REGULATION_OF_ENDOTHELIAL_CELL_MIGRATION		63	0.481141	1.32253	0.112245	0.273493	1	2223	tags=27%, list=13%, signal=31%
GO_POSITIVE_REGULATION_OF_INTERFERON_BETA_PRODUCTION	GO_POSITIVE_REGULATION_OF_INTERFERON_BETA_PRODUCTION		29	0.57614	1.32235	0.180791	0.273517	1	2785	tags=41%, list=16%, signal=49%
GO_CELLULAR_RESPONSE_TO_BIOTIC_STIMULUS	GO_CELLULAR_RESPONSE_TO_BIOTIC_STIMULUS		153	0.6217	1.6034	0.0115163	0.273797	0.995	2202	tags=37%, list=13%, signal=42%
GO_REGULATION_OF_INTERFERON_GAMMA_BIOSYNTHETIC_PROCESS	GO_REGULATION_OF_INTERFERON_GAMMA_BIOSYNTHETIC_PROCESS		16	0.7593	1.60505	0.013834	0.274065	0.995	2816	tags=50%, list=16%, signal=60%
GO_WATER_SOLUBLE_VITAMIN_METABOLIC_PROCESS	GO_WATER_SOLUBLE_VITAMIN_METABOLIC_PROCESS		78	0.380565	1.32087	0.0912621	0.274288	1	3959	tags=35%, list=23%, signal=45%
GO_REGULATION_OF_SUBSTRATE_ADHESION_DEPENDENT_CELL_SPREADING	GO_REGULATION_OF_SUBSTRATE_ADHESION_DEPENDENT_CELL_SPREADING		39	0.470682	1.32089	0.134503	0.274555	1	2103	tags=28%, list=12%, signal=32%
GO_MEMBRANE_PROTEIN_PROTEOLYSIS	GO_MEMBRANE_PROTEIN_PROTEOLYSIS		33	0.494691	1.31951	0.117764	0.275458	1	3716	tags=45%, list=22%, signal=58%
GO_EPITHELIAL_CELL_APOPTOTIC_PROCESS	GO_EPITHELIAL_CELL_APOPTOTIC_PROCESS		24	0.464317	1.31986	0.147727	0.275517	1	3616	tags=42%, list=21%, signal=53%
GO_CELLULAR_RESPONSE_TO_REACTIVE_NITROGEN_SPECIES	GO_CELLULAR_RESPONSE_TO_REACTIVE_NITROGEN_SPECIES		18	0.568024	1.31963	0.0946746	0.275563	1	2592	tags=39%, list=15%, signal=46%
GO_NEGATIVE_REGULATION_OF_ENDOTHELIAL_CELL_MIGRATION	GO_NEGATIVE_REGULATION_OF_ENDOTHELIAL_CELL_MIGRATION		37	0.520223	1.31899	0.136986	0.275706	1	1838	tags=24%, list=11%, signal=27%
GO_MONOVALENT_INORGANIC_ANION_HOMEOSTASIS	GO_MONOVALENT_INORGANIC_ANION_HOMEOSTASIS		18	0.533733	1.3191	0.12326	0.275803	1	65	tags=11%, list=0%, signal=11%
GO_LACTATION	GO_LACTATION		39	0.433046	1.31866	0.125761	0.275893	1	757	tags=13%, list=4%, signal=13%
GO_REGULATION_OF_TRIGLYCERIDE_METABOLIC_PROCESS	GO_REGULATION_OF_TRIGLYCERIDE_METABOLIC_PROCESS		33	0.424504	1.31712	0.12369	0.275961	1	3002	tags=24%, list=17%, signal=29%
GO_REGULATION_OF_DEFENSE_RESPONSE_TO_VIRUS	GO_REGULATION_OF_DEFENSE_RESPONSE_TO_VIRUS		166	0.358447	1.31728	0.0831722	0.276011	1	3049	tags=26%, list=18%, signal=31%
GO_REGULATION_OF_PLATELET_ACTIVATION	GO_REGULATION_OF_PLATELET_ACTIVATION		30	0.541877	1.31631	0.159223	0.276029	1	1364	tags=27%, list=8%, signal=29%
GO_NEGATIVE_REGULATION_OF_INTRACELLULAR_SIGNAL_TRANSDUCTION	GO_NEGATIVE_REGULATION_OF_INTRACELLULAR_SIGNAL_TRANSDUCTION		405	0.353297	1.31836	0.0475248	0.276045	1	3662	tags=33%, list=21%, signal=40%
GO_REGULATION_OF_POLYSACCHARIDE_METABOLIC_PROCESS	GO_REGULATION_OF_POLYSACCHARIDE_METABOLIC_PROCESS		39	0.470099	1.3174	0.0976562	0.276126	1	4137	tags=44%, list=24%, signal=57%
GO_REGULATION_OF_ACTIN_CYTOSKELETON_REORGANIZATION	GO_REGULATION_OF_ACTIN_CYTOSKELETON_REORGANIZATION		31	0.514992	1.31637	0.156	0.276239	1	4169	tags=55%, list=24%, signal=72%
GO_CALCIUM_INDEPENDENT_CELL_CELL_ADHESION_VIA_PLASMA_MEMBRANE_CELL_ADHESION_MOLECULES	GO_CALCIUM_INDEPENDENT_CELL_CELL_ADHESION_VIA_PLASMA_MEMBRANE_CELL_ADHESION_MOLECULES		20	0.569378	1.60526	0.0309478	0.276244	0.995	3605	tags=30%, list=21%, signal=38%
GO_MAINTENANCE_OF_LOCATION	GO_MAINTENANCE_OF_LOCATION		133	0.389331	1.31594	0.074	0.276344	1	3036	tags=29%, list=18%, signal=34%
GO_LYMPH_VESSEL_DEVELOPMENT	GO_LYMPH_VESSEL_DEVELOPMENT		20	0.599753	1.31797	0.157495	0.276384	1	1880	tags=35%, list=11%, signal=39%
GO_REGULATION_OF_ACTIN_FILAMENT_LENGTH	GO_REGULATION_OF_ACTIN_FILAMENT_LENGTH		141	0.387851	1.31741	0.0968379	0.276403	1	3484	tags=35%, list=20%, signal=44%
GO_PLATELET_DERIVED_GROWTH_FACTOR_RECEPTOR_SIGNALING_PATHWAY	GO_PLATELET_DERIVED_GROWTH_FACTOR_RECEPTOR_SIGNALING_PATHWAY		34	0.522165	1.31645	0.126233	0.276412	1	1504	tags=29%, list=9%, signal=32%
GO_NEGATIVE_REGULATION_OF_MEIOTIC_CELL_CYCLE	GO_NEGATIVE_REGULATION_OF_MEIOTIC_CELL_CYCLE		18	0.494216	1.31754	0.126953	0.276506	1	4900	tags=50%, list=28%, signal=70%
GO_REGULATION_OF_LEUKOCYTE_DIFFERENTIATION	GO_REGULATION_OF_LEUKOCYTE_DIFFERENTIATION		216	0.545189	1.60804	0.00761905	0.276542	0.995	3068	tags=37%, list=18%, signal=44%
GO_BLOOD_VESSEL_ENDOTHELIAL_CELL_MIGRATION	GO_BLOOD_VESSEL_ENDOTHELIAL_CELL_MIGRATION		23	0.57065	1.31562	0.102767	0.276558	1	4109	tags=57%, list=24%, signal=74%
GO_POSITIVE_REGULATION_OF_MACROPHAGE_DERIVED_FOAM_CELL_DIFFERENTIATION	GO_POSITIVE_REGULATION_OF_MACROPHAGE_DERIVED_FOAM_CELL_DIFFERENTIATION		15	0.62245	1.31768	0.114286	0.276585	1	5012	tags=73%, list=29%, signal=103%
GO_NUCLEOSIDE_DIPHOSPHATE_METABOLIC_PROCESS	GO_NUCLEOSIDE_DIPHOSPHATE_METABOLIC_PROCESS		72	0.422622	1.31648	0.134146	0.27666	1	4517	tags=46%, list=26%, signal=62%
GO_ORGANOPHOSPHATE_ESTER_TRANSPORT	GO_ORGANOPHOSPHATE_ESTER_TRANSPORT		80	0.362852	1.31487	0.0742188	0.276894	1	4289	tags=36%, list=25%, signal=48%
GO_REGULATION_OF_EXOSOMAL_SECRETION	GO_REGULATION_OF_EXOSOMAL_SECRETION		17	0.468393	1.31518	0.121086	0.276966	1	375	tags=12%, list=2%, signal=12%
GO_POSITIVE_REGULATION_OF_CYTOPLASMIC_TRANSPORT	GO_POSITIVE_REGULATION_OF_CYTOPLASMIC_TRANSPORT		253	0.360101	1.31494	0.0567515	0.277057	1	3053	tags=24%, list=18%, signal=29%
GO_B_CELL_RECEPTOR_SIGNALING_PATHWAY	GO_B_CELL_RECEPTOR_SIGNALING_PATHWAY		41	0.593056	1.31348	0.151751	0.277291	1	2007	tags=34%, list=12%, signal=39%
GO_OLIGOSACCHARIDE_METABOLIC_PROCESS	GO_OLIGOSACCHARIDE_METABOLIC_PROCESS		63	0.426648	1.31365	0.0921844	0.277346	1	3629	tags=46%, list=21%, signal=58%
GO_REGULATION_OF_CYTOKINE_PRODUCTION_INVOLVED_IN_INFLAMMATORY_RESPONSE	GO_REGULATION_OF_CYTOKINE_PRODUCTION_INVOLVED_IN_INFLAMMATORY_RESPONSE		18	0.520056	1.31397	0.160083	0.277416	1	4221	tags=50%, list=25%, signal=66%
GO_SENSORY_PERCEPTION_OF_LIGHT_STIMULUS	GO_SENSORY_PERCEPTION_OF_LIGHT_STIMULUS		198	0.326744	1.31305	0.0633663	0.277427	1	2336	tags=13%, list=14%, signal=15%
GO_REGULATION_OF_PROTEIN_LOCALIZATION_TO_NUCLEUS	GO_REGULATION_OF_PROTEIN_LOCALIZATION_TO_NUCLEUS		204	0.382764	1.31373	0.0647773	0.277499	1	3053	tags=27%, list=18%, signal=33%
GO_REGULATION_OF_CELLULAR_RESPONSE_TO_TRANSFORMING_GROWTH_FACTOR_BETA_STIMULUS	GO_REGULATION_OF_CELLULAR_RESPONSE_TO_TRANSFORMING_GROWTH_FACTOR_BETA_STIMULUS		91	0.434754	1.31318	0.105578	0.27752	1	2402	tags=25%, list=14%, signal=29%
GO_REGULATION_OF_INTERLEUKIN_12_PRODUCTION	GO_REGULATION_OF_INTERLEUKIN_12_PRODUCTION		50	0.497657	1.31425	0.179732	0.277574	1	3701	tags=36%, list=22%, signal=46%
GO_RESPONSE_TO_GROWTH_HORMONE	GO_RESPONSE_TO_GROWTH_HORMONE		29	0.473814	1.31402	0.112426	0.277645	1	3028	tags=31%, list=18%, signal=38%
GO_POSITIVE_REGULATION_OF_CYTOKINE_BIOSYNTHETIC_PROCESS	GO_POSITIVE_REGULATION_OF_CYTOKINE_BIOSYNTHETIC_PROCESS		57	0.658754	1.60552	0.0245747	0.278205	0.995	2412	tags=37%, list=14%, signal=43%
GO_POSITIVE_REGULATION_OF_MUSCLE_CONTRACTION	GO_POSITIVE_REGULATION_OF_MUSCLE_CONTRACTION		41	0.482539	1.31199	0.114519	0.278398	1	1160	tags=22%, list=7%, signal=23%
GO_REGULATION_OF_PROTEIN_TYROSINE_KINASE_ACTIVITY	GO_REGULATION_OF_PROTEIN_TYROSINE_KINASE_ACTIVITY		54	0.435604	1.31215	0.079918	0.278423	1	2387	tags=28%, list=14%, signal=32%
GO_REGULATION_OF_PROTEIN_SERINE_THREONINE_KINASE_ACTIVITY	GO_REGULATION_OF_PROTEIN_SERINE_THREONINE_KINASE_ACTIVITY		438	0.363275	1.31166	0.0254902	0.278626	1	3261	tags=28%, list=19%, signal=34%
GO_NATURAL_KILLER_CELL_ACTIVATION_INVOLVED_IN_IMMUNE_RESPONSE	GO_NATURAL_KILLER_CELL_ACTIVATION_INVOLVED_IN_IMMUNE_RESPONSE		19	0.514451	1.60822	0.0292398	0.278741	0.995	1245	tags=11%, list=7%, signal=11%
GO_POSITIVE_REGULATION_OF_ACTIN_FILAMENT_POLYMERIZATION	GO_POSITIVE_REGULATION_OF_ACTIN_FILAMENT_POLYMERIZATION		58	0.426474	1.31115	0.125714	0.279061	1	3484	tags=38%, list=20%, signal=47%
GO_POSITIVE_REGULATION_OF_PROTEIN_COMPLEX_ASSEMBLY	GO_POSITIVE_REGULATION_OF_PROTEIN_COMPLEX_ASSEMBLY		171	0.391808	1.31078	0.109827	0.279352	1	3151	tags=30%, list=18%, signal=37%
GO_AMINOGLYCAN_BIOSYNTHETIC_PROCESS	GO_AMINOGLYCAN_BIOSYNTHETIC_PROCESS		102	0.473454	1.31058	0.0645161	0.279353	1	3128	tags=39%, list=18%, signal=48%
GO_CELL_JUNCTION_ORGANIZATION	GO_CELL_JUNCTION_ORGANIZATION		171	0.404689	1.30977	0.0761523	0.279782	1	3095	tags=32%, list=18%, signal=38%
GO_SULFUR_COMPOUND_BIOSYNTHETIC_PROCESS	GO_SULFUR_COMPOUND_BIOSYNTHETIC_PROCESS		183	0.390043	1.30993	0.0802469	0.279801	1	3699	tags=36%, list=22%, signal=45%
GO_NEGATIVE_REGULATION_OF_CELL_SUBSTRATE_ADHESION	GO_NEGATIVE_REGULATION_OF_CELL_SUBSTRATE_ADHESION		48	0.507028	1.31001	0.102317	0.279962	1	1665	tags=27%, list=10%, signal=30%
GO_CELL_MATRIX_ADHESION	GO_CELL_MATRIX_ADHESION		110	0.586659	1.6086	0.00595238	0.280152	0.994	3244	tags=41%, list=19%, signal=50%
GO_CYTOKINE_MEDIATED_SIGNALING_PATHWAY	GO_CYTOKINE_MEDIATED_SIGNALING_PATHWAY		415	0.557552	1.60567	0.0114286	0.280343	0.995	2996	tags=38%, list=17%, signal=44%
GO_LYMPHOCYTE_ACTIVATION_INVOLVED_IN_IMMUNE_RESPONSE	GO_LYMPHOCYTE_ACTIVATION_INVOLVED_IN_IMMUNE_RESPONSE		91	0.54222	1.60925	0.0133588	0.281232	0.994	3112	tags=32%, list=18%, signal=39%
GO_TETRAPYRROLE_METABOLIC_PROCESS	GO_TETRAPYRROLE_METABOLIC_PROCESS		51	0.422684	1.61022	0.021611	0.281452	0.992	4987	tags=41%, list=29%, signal=58%
GO_LIPID_CATABOLIC_PROCESS	GO_LIPID_CATABOLIC_PROCESS		221	0.361226	1.30842	0.112676	0.281531	1	3901	tags=29%, list=23%, signal=38%
GO_MAINTENANCE_OF_LOCATION_IN_CELL	GO_MAINTENANCE_OF_LOCATION_IN_CELL		92	0.378629	1.30803	0.0826772	0.281797	1	2980	tags=27%, list=17%, signal=33%
GO_REGULATION_OF_B_CELL_APOPTOTIC_PROCESS	GO_REGULATION_OF_B_CELL_APOPTOTIC_PROCESS		18	0.550108	1.30761	0.174905	0.282156	1	2900	tags=39%, list=17%, signal=47%
GO_REGULATION_OF_URINE_VOLUME	GO_REGULATION_OF_URINE_VOLUME		20	0.480678	1.30689	0.129344	0.282989	1	4183	tags=30%, list=24%, signal=40%
GO_ER_TO_GOLGI_VESICLE_MEDIATED_TRANSPORT	GO_ER_TO_GOLGI_VESICLE_MEDIATED_TRANSPORT		155	0.323963	1.30644	0.114754	0.283042	1	3928	tags=32%, list=23%, signal=41%
GO_REGULATION_OF_GASTRULATION	GO_REGULATION_OF_GASTRULATION		31	0.547866	1.30665	0.114458	0.28305	1	3522	tags=42%, list=20%, signal=53%
GO_REGULATION_OF_RECEPTOR_BIOSYNTHETIC_PROCESS	GO_REGULATION_OF_RECEPTOR_BIOSYNTHETIC_PROCESS		21	0.53824	1.61062	0.0116959	0.283146	0.992	4639	tags=52%, list=27%, signal=72%
GO_CYTOPLASMIC_SEQUESTERING_OF_PROTEIN	GO_CYTOPLASMIC_SEQUESTERING_OF_PROTEIN		40	0.421826	1.30575	0.13745	0.283291	1	4363	tags=48%, list=25%, signal=63%
GO_INTERLEUKIN_1_PRODUCTION	GO_INTERLEUKIN_1_PRODUCTION		15	0.708115	1.30555	0.135294	0.283304	1	1704	tags=47%, list=10%, signal=52%
GO_ENERGY_RESERVE_METABOLIC_PROCESS	GO_ENERGY_RESERVE_METABOLIC_PROCESS		66	0.417239	1.30606	0.118447	0.283355	1	4290	tags=45%, list=25%, signal=60%
GO_REGULATION_OF_ACTIN_FILAMENT_BASED_PROCESS	GO_REGULATION_OF_ACTIN_FILAMENT_BASED_PROCESS		289	0.375507	1.30584	0.0729783	0.283416	1	3492	tags=34%, list=20%, signal=41%
GO_ANTIGEN_PROCESSING_AND_PRESENTATION_OF_ENDOGENOUS_ANTIGEN	GO_ANTIGEN_PROCESSING_AND_PRESENTATION_OF_ENDOGENOUS_ANTIGEN		17	0.631699	1.30528	0.158879	0.283463	1	3040	tags=59%, list=18%, signal=71%
GO_NEGATIVE_REGULATION_OF_T_CELL_PROLIFERATION	GO_NEGATIVE_REGULATION_OF_T_CELL_PROLIFERATION		44	0.581464	1.61243	0.0267176	0.28383	0.992	3095	tags=43%, list=18%, signal=53%
GO_CELLULAR_RESPONSE_TO_AMINO_ACID_STARVATION	GO_CELLULAR_RESPONSE_TO_AMINO_ACID_STARVATION		22	0.472694	1.30486	0.157282	0.283859	1	1900	tags=32%, list=11%, signal=36%
GO_REGULATION_OF_MAST_CELL_ACTIVATION	GO_REGULATION_OF_MAST_CELL_ACTIVATION		37	0.723733	1.61137	0.0114504	0.28391	0.992	1879	tags=49%, list=11%, signal=54%
GO_RENAL_SYSTEM_PROCESS	GO_RENAL_SYSTEM_PROCESS		99	0.434224	1.3037	0.0856031	0.284807	1	1940	tags=19%, list=11%, signal=22%
GO_NEGATIVE_REGULATION_OF_ENDOTHELIAL_CELL_PROLIFERATION	GO_NEGATIVE_REGULATION_OF_ENDOTHELIAL_CELL_PROLIFERATION		29	0.528728	1.30347	0.146199	0.284849	1	1810	tags=28%, list=11%, signal=31%
GO_RESPONSE_TO_AMINO_ACID	GO_RESPONSE_TO_AMINO_ACID		103	0.436954	1.304	0.0818713	0.284883	1	2177	tags=27%, list=13%, signal=31%
GO_SINGLE_ORGANISM_MEMBRANE_BUDDING	GO_SINGLE_ORGANISM_MEMBRANE_BUDDING		68	0.39428	1.30287	0.133072	0.284958	1	4161	tags=40%, list=24%, signal=52%
GO_BIOMINERAL_TISSUE_DEVELOPMENT	GO_BIOMINERAL_TISSUE_DEVELOPMENT		68	0.457084	1.30375	0.11553	0.285015	1	1689	tags=24%, list=10%, signal=26%
GO_POSITIVE_REGULATION_OF_LIPASE_ACTIVITY	GO_POSITIVE_REGULATION_OF_LIPASE_ACTIVITY		64	0.468775	1.3029	0.108911	0.285199	1	3637	tags=39%, list=21%, signal=49%
GO_REGULATION_OF_VASCULAR_PERMEABILITY	GO_REGULATION_OF_VASCULAR_PERMEABILITY		30	0.481052	1.30254	0.0848485	0.28521	1	450	tags=17%, list=3%, signal=17%
GO_NEGATIVE_REGULATION_OF_ACTIN_FILAMENT_DEPOLYMERIZATION	GO_NEGATIVE_REGULATION_OF_ACTIN_FILAMENT_DEPOLYMERIZATION		33	0.466841	1.30302	0.162162	0.285303	1	3426	tags=36%, list=20%, signal=45%
GO_MAMMARY_GLAND_MORPHOGENESIS	GO_MAMMARY_GLAND_MORPHOGENESIS		37	0.471416	1.30076	0.145194	0.285763	1	3301	tags=38%, list=19%, signal=47%
GO_ARGININE_METABOLIC_PROCESS	GO_ARGININE_METABOLIC_PROCESS		17	0.548356	1.30048	0.14425	0.285885	1	1465	tags=24%, list=9%, signal=26%
GO_POSITIVE_REGULATION_OF_LEUKOCYTE_DIFFERENTIATION	GO_POSITIVE_REGULATION_OF_LEUKOCYTE_DIFFERENTIATION		122	0.592859	1.61269	0.00374532	0.285926	0.992	3068	tags=41%, list=18%, signal=50%
GO_REGULATION_OF_CHOLESTEROL_METABOLIC_PROCESS	GO_REGULATION_OF_CHOLESTEROL_METABOLIC_PROCESS		22	0.512579	1.30101	0.167006	0.285944	1	2993	tags=41%, list=17%, signal=49%
GO_REGULATION_OF_LEUKOCYTE_APOPTOTIC_PROCESS	GO_REGULATION_OF_LEUKOCYTE_APOPTOTIC_PROCESS		75	0.482192	1.30078	0.151052	0.286031	1	3953	tags=43%, list=23%, signal=55%
GO_RESPONSE_TO_FLUID_SHEAR_STRESS	GO_RESPONSE_TO_FLUID_SHEAR_STRESS		34	0.56173	1.30163	0.146484	0.286046	1	3165	tags=53%, list=18%, signal=65%
GO_POSITIVE_REGULATION_OF_OXIDOREDUCTASE_ACTIVITY	GO_POSITIVE_REGULATION_OF_OXIDOREDUCTASE_ACTIVITY		44	0.439001	1.29927	0.0968379	0.286067	1	4108	tags=39%, list=24%, signal=51%
GO_REGULATION_OF_HETEROTYPIC_CELL_CELL_ADHESION	GO_REGULATION_OF_HETEROTYPIC_CELL_CELL_ADHESION		18	0.521357	1.30176	0.136986	0.286138	1	1403	tags=22%, list=8%, signal=24%
GO_REGULATION_OF_INTERLEUKIN_1_BETA_PRODUCTION	GO_REGULATION_OF_INTERLEUKIN_1_BETA_PRODUCTION		43	0.519708	1.30103	0.163107	0.286183	1	2923	tags=35%, list=17%, signal=42%
GO_PROSTANOID_BIOSYNTHETIC_PROCESS	GO_PROSTANOID_BIOSYNTHETIC_PROCESS		18	0.639457	1.30118	0.13442	0.286227	1	1257	tags=39%, list=7%, signal=42%
GO_POSITIVE_REGULATION_OF_INTERLEUKIN_10_PRODUCTION	GO_POSITIVE_REGULATION_OF_INTERLEUKIN_10_PRODUCTION		27	0.552534	1.29932	0.202	0.286276	1	3815	tags=52%, list=22%, signal=67%
GO_REGULATION_OF_NUCLEASE_ACTIVITY	GO_REGULATION_OF_NUCLEASE_ACTIVITY		22	0.498251	1.29998	0.163227	0.286311	1	4068	tags=55%, list=24%, signal=71%
GO_CYTOKINE_SECRETION	GO_CYTOKINE_SECRETION		37	0.575039	1.30126	0.152134	0.286346	1	1704	tags=30%, list=10%, signal=33%
GO_POSITIVE_REGULATION_OF_VASODILATION	GO_POSITIVE_REGULATION_OF_VASODILATION		31	0.529166	1.29893	0.132554	0.286362	1	2202	tags=29%, list=13%, signal=33%
GO_MOVEMENT_IN_ENVIRONMENT_OF_OTHER_ORGANISM_INVOLVED_IN_SYMBIOTIC_INTERACTION	GO_MOVEMENT_IN_ENVIRONMENT_OF_OTHER_ORGANISM_INVOLVED_IN_SYMBIOTIC_INTERACTION		77	0.619999	1.61353	0.00776699	0.286396	0.992	3328	tags=49%, list=19%, signal=61%
GO_REGULATION_OF_PROTEIN_TARGETING	GO_REGULATION_OF_PROTEIN_TARGETING		267	0.357346	1.29937	0.0705882	0.286475	1	3053	tags=28%, list=18%, signal=33%
GO_NEGATIVE_REGULATION_OF_ANTIGEN_RECEPTOR_MEDIATED_SIGNALING_PATHWAY	GO_NEGATIVE_REGULATION_OF_ANTIGEN_RECEPTOR_MEDIATED_SIGNALING_PATHWAY		18	0.577553	1.29966	0.184825	0.286545	1	4966	tags=72%, list=29%, signal=101%
GO_REGULATION_OF_MEMBRANE_PERMEABILITY	GO_REGULATION_OF_MEMBRANE_PERMEABILITY		67	0.377113	1.29938	0.0928854	0.286739	1	3484	tags=27%, list=20%, signal=34%
GO_REGULATION_OF_T_CELL_PROLIFERATION	GO_REGULATION_OF_T_CELL_PROLIFERATION		134	0.604382	1.61452	0.0154143	0.287034	0.992	2816	tags=36%, list=16%, signal=42%
GO_POSITIVE_REGULATION_OF_CATABOLIC_PROCESS	GO_POSITIVE_REGULATION_OF_CATABOLIC_PROCESS		371	0.31273	1.29789	0.0644531	0.287684	1	3599	tags=26%, list=21%, signal=32%
GO_CELLULAR_RESPONSE_TO_FLUID_SHEAR_STRESS	GO_CELLULAR_RESPONSE_TO_FLUID_SHEAR_STRESS		19	0.60026	1.29555	0.134241	0.289399	1	3165	tags=53%, list=18%, signal=64%
GO_MUSCLE_ORGAN_DEVELOPMENT	GO_MUSCLE_ORGAN_DEVELOPMENT		249	0.386115	1.29661	0.0451866	0.289405	1	2464	tags=24%, list=14%, signal=28%
GO_POSITIVE_REGULATION_OF_TRANSCRIPTION_FACTOR_IMPORT_INTO_NUCLEUS	GO_POSITIVE_REGULATION_OF_TRANSCRIPTION_FACTOR_IMPORT_INTO_NUCLEUS		46	0.49655	1.29562	0.147705	0.289577	1	3041	tags=37%, list=18%, signal=45%
GO_POSITIVE_REGULATION_OF_RESPONSE_TO_BIOTIC_STIMULUS	GO_POSITIVE_REGULATION_OF_RESPONSE_TO_BIOTIC_STIMULUS		34	0.45938	1.29518	0.17451	0.289669	1	2785	tags=29%, list=16%, signal=35%
GO_NON_CANONICAL_WNT_SIGNALING_PATHWAY	GO_NON_CANONICAL_WNT_SIGNALING_PATHWAY		133	0.345737	1.29569	0.0892857	0.289737	1	3657	tags=29%, list=21%, signal=36%
GO_SIGNAL_TRANSDUCTION_IN_ABSENCE_OF_LIGAND	GO_SIGNAL_TRANSDUCTION_IN_ABSENCE_OF_LIGAND		32	0.49672	1.29597	0.139764	0.289859	1	2529	tags=34%, list=15%, signal=40%
GO_REGULATION_OF_DNA_DAMAGE_RESPONSE_SIGNAL_TRANSDUCTION_BY_P53_CLASS_MEDIATOR	GO_REGULATION_OF_DNA_DAMAGE_RESPONSE_SIGNAL_TRANSDUCTION_BY_P53_CLASS_MEDIATOR		27	0.538674	1.29573	0.140417	0.289972	1	3435	tags=48%, list=20%, signal=60%
GO_CELLULAR_LIPID_CATABOLIC_PROCESS	GO_CELLULAR_LIPID_CATABOLIC_PROCESS		139	0.375674	1.29607	0.113095	0.28998	1	3891	tags=34%, list=23%, signal=43%
GO_CELLULAR_CARBOHYDRATE_BIOSYNTHETIC_PROCESS	GO_CELLULAR_CARBOHYDRATE_BIOSYNTHETIC_PROCESS		47	0.5454	1.61455	0.0134615	0.29003	0.992	3357	tags=36%, list=20%, signal=45%
GO_REGULATION_OF_I_KAPPAB_KINASE_NF_KAPPAB_SIGNALING	GO_REGULATION_OF_I_KAPPAB_KINASE_NF_KAPPAB_SIGNALING		217	0.554228	1.62264	0.00389864	0.290788	0.992	3126	tags=41%, list=18%, signal=50%
GO_NEGATIVE_REGULATION_OF_PROTEIN_LOCALIZATION_TO_CELL_PERIPHERY	GO_NEGATIVE_REGULATION_OF_PROTEIN_LOCALIZATION_TO_CELL_PERIPHERY		20	0.508442	1.2941	0.139442	0.29107	1	3647	tags=55%, list=21%, signal=70%
GO_REGULATION_OF_PROTEIN_IMPORT	GO_REGULATION_OF_PROTEIN_IMPORT		170	0.390278	1.2934	0.0701403	0.291843	1	3053	tags=31%, list=18%, signal=37%
GO_MONOCYTE_DIFFERENTIATION	GO_MONOCYTE_DIFFERENTIATION		16	0.585606	1.29298	0.155556	0.291945	1	2192	tags=50%, list=13%, signal=57%
GO_POSITIVE_REGULATION_OF_LYMPHOCYTE_MEDIATED_IMMUNITY	GO_POSITIVE_REGULATION_OF_LYMPHOCYTE_MEDIATED_IMMUNITY		63	0.418867	1.29306	0.150097	0.292107	1	4595	tags=44%, list=27%, signal=60%
GO_CHOLESTEROL_EFFLUX	GO_CHOLESTEROL_EFFLUX		26	0.670389	1.62342	0.0178571	0.292176	0.992	2792	tags=35%, list=16%, signal=41%
GO_REGULATION_OF_LEUKOCYTE_PROLIFERATION	GO_REGULATION_OF_LEUKOCYTE_PROLIFERATION		191	0.599686	1.61496	0.0153551	0.292236	0.992	2816	tags=37%, list=16%, signal=43%
GO_INTERACTION_WITH_HOST	GO_INTERACTION_WITH_HOST		119	0.559295	1.62465	0	0.292243	0.992	3328	tags=43%, list=19%, signal=53%
GO_LEUKOCYTE_APOPTOTIC_PROCESS	GO_LEUKOCYTE_APOPTOTIC_PROCESS		21	0.673978	1.61935	0.0078125	0.293138	0.992	3662	tags=52%, list=21%, signal=66%
GO_MUSCLE_STRUCTURE_DEVELOPMENT	GO_MUSCLE_STRUCTURE_DEVELOPMENT		397	0.362607	1.29186	0.0535714	0.293484	1	2464	tags=22%, list=14%, signal=25%
GO_MYELOID_CELL_HOMEOSTASIS	GO_MYELOID_CELL_HOMEOSTASIS		81	0.505058	1.63049	0.00580271	0.294131	0.99	2733	tags=32%, list=16%, signal=38%
GO_REGULATION_OF_MYOBLAST_FUSION	GO_REGULATION_OF_MYOBLAST_FUSION		19	0.763136	1.62666	0.00588235	0.294228	0.992	2655	tags=53%, list=15%, signal=62%
GO_POSITIVE_REGULATION_OF_SMOOTH_MUSCLE_CELL_PROLIFERATION	GO_POSITIVE_REGULATION_OF_SMOOTH_MUSCLE_CELL_PROLIFERATION		58	0.492773	1.29035	0.125241	0.294461	1	2436	tags=36%, list=14%, signal=42%
GO_REGULATION_OF_MYOTUBE_DIFFERENTIATION	GO_REGULATION_OF_MYOTUBE_DIFFERENTIATION		50	0.550506	1.61535	0.00595238	0.294534	0.992	3041	tags=40%, list=18%, signal=48%
GO_NEGATIVE_REGULATION_OF_MYELOID_LEUKOCYTE_DIFFERENTIATION	GO_NEGATIVE_REGULATION_OF_MYELOID_LEUKOCYTE_DIFFERENTIATION		42	0.489548	1.29011	0.137405	0.294589	1	3183	tags=38%, list=19%, signal=47%
GO_LIPOSACCHARIDE_METABOLIC_PROCESS	GO_LIPOSACCHARIDE_METABOLIC_PROCESS		102	0.387797	1.29081	0.100604	0.294602	1	3103	tags=33%, list=18%, signal=40%
GO_CELLULAR_RESPONSE_TO_HYDROGEN_PEROXIDE	GO_CELLULAR_RESPONSE_TO_HYDROGEN_PEROXIDE		60	0.486238	1.29099	0.116732	0.294603	1	2123	tags=28%, list=12%, signal=32%
GO_NEGATIVE_REGULATION_OF_PEPTIDYL_SERINE_PHOSPHORYLATION	GO_NEGATIVE_REGULATION_OF_PEPTIDYL_SERINE_PHOSPHORYLATION		20	0.518698	1.29035	0.129293	0.294744	1	3528	tags=35%, list=21%, signal=44%
GO_NEGATIVE_REGULATION_OF_HOMOTYPIC_CELL_CELL_ADHESION	GO_NEGATIVE_REGULATION_OF_HOMOTYPIC_CELL_CELL_ADHESION		89	0.566629	1.62512	0.0077821	0.294765	0.992	3095	tags=39%, list=18%, signal=48%
GO_REGULATION_OF_NITRIC_OXIDE_SYNTHASE_BIOSYNTHETIC_PROCESS	GO_REGULATION_OF_NITRIC_OXIDE_SYNTHASE_BIOSYNTHETIC_PROCESS		16	0.662365	1.29049	0.161417	0.294824	1	2373	tags=44%, list=14%, signal=51%
GO_CELLULAR_MONOVALENT_INORGANIC_CATION_HOMEOSTASIS	GO_CELLULAR_MONOVALENT_INORGANIC_CATION_HOMEOSTASIS		89	0.375656	1.28955	0.113131	0.295139	1	2281	tags=21%, list=13%, signal=24%
GO_RESPONSE_TO_BACTERIUM	GO_RESPONSE_TO_BACTERIUM		452	0.588436	1.62747	0.00191939	0.295373	0.992	2613	tags=33%, list=15%, signal=38%
GO_POSITIVE_REGULATION_OF_I_KAPPAB_KINASE_NF_KAPPAB_SIGNALING	GO_POSITIVE_REGULATION_OF_I_KAPPAB_KINASE_NF_KAPPAB_SIGNALING		168	0.589873	1.62855	0.00589391	0.296115	0.991	2806	tags=40%, list=16%, signal=48%
GO_POSITIVE_REGULATION_OF_CHEMOKINE_PRODUCTION	GO_POSITIVE_REGULATION_OF_CHEMOKINE_PRODUCTION		47	0.707085	1.61583	0.00956023	0.296392	0.992	2037	tags=38%, list=12%, signal=43%
GO_CELL_DIFFERENTIATION_INVOLVED_IN_KIDNEY_DEVELOPMENT	GO_CELL_DIFFERENTIATION_INVOLVED_IN_KIDNEY_DEVELOPMENT		34	0.488241	1.28801	0.140115	0.296418	1	1810	tags=26%, list=11%, signal=30%
GO_RECEPTOR_METABOLIC_PROCESS	GO_RECEPTOR_METABOLIC_PROCESS		73	0.451503	1.28856	0.12253	0.296433	1	2840	tags=23%, list=17%, signal=28%
GO_LEUKOTRIENE_METABOLIC_PROCESS	GO_LEUKOTRIENE_METABOLIC_PROCESS		27	0.690951	1.61937	0.00984252	0.296535	0.992	3440	tags=48%, list=20%, signal=60%
GO_LUNG_MORPHOGENESIS	GO_LUNG_MORPHOGENESIS		45	0.498296	1.28811	0.0807087	0.296544	1	1813	tags=31%, list=11%, signal=35%
GO_EPOXYGENASE_P450_PATHWAY	GO_EPOXYGENASE_P450_PATHWAY		17	0.532952	1.28829	0.157143	0.296552	1	841	tags=18%, list=5%, signal=19%
GO_IRON_ION_TRANSPORT	GO_IRON_ION_TRANSPORT		51	0.431602	1.28615	0.12249	0.296766	1	3570	tags=33%, list=21%, signal=42%
GO_FC_EPSILON_RECEPTOR_SIGNALING_PATHWAY	GO_FC_EPSILON_RECEPTOR_SIGNALING_PATHWAY		125	0.378387	1.28756	0.181996	0.296881	1	2615	tags=22%, list=15%, signal=26%
GO_NEGATIVE_REGULATION_OF_CHEMOTAXIS	GO_NEGATIVE_REGULATION_OF_CHEMOTAXIS		47	0.507345	1.28734	0.10084	0.296919	1	3588	tags=49%, list=21%, signal=62%
GO_PEPTIDYL_TYROSINE_AUTOPHOSPHORYLATION	GO_PEPTIDYL_TYROSINE_AUTOPHOSPHORYLATION		38	0.429613	1.28619	0.186139	0.297007	1	4108	tags=32%, list=24%, signal=41%
GO_REGULATION_OF_ENDOCYTOSIS	GO_REGULATION_OF_ENDOCYTOSIS		192	0.407648	1.28633	0.124236	0.297063	1	2819	tags=30%, list=16%, signal=36%
GO_REGULATION_OF_PEPTIDYL_SERINE_PHOSPHORYLATION	GO_REGULATION_OF_PEPTIDYL_SERINE_PHOSPHORYLATION		107	0.386751	1.2864	0.0993789	0.297246	1	3281	tags=24%, list=19%, signal=30%
GO_T_CELL_PROLIFERATION	GO_T_CELL_PROLIFERATION		34	0.517808	1.28688	0.177024	0.297343	1	3002	tags=50%, list=17%, signal=60%
GO_NEGATIVE_REGULATION_OF_SIGNAL_TRANSDUCTION_BY_P53_CLASS_MEDIATOR	GO_NEGATIVE_REGULATION_OF_SIGNAL_TRANSDUCTION_BY_P53_CLASS_MEDIATOR		26	0.503955	1.28649	0.161228	0.297404	1	1820	tags=31%, list=11%, signal=34%
GO_MYELOID_LEUKOCYTE_MEDIATED_IMMUNITY	GO_MYELOID_LEUKOCYTE_MEDIATED_IMMUNITY		40	0.534573	1.28667	0.152542	0.29741	1	3092	tags=45%, list=18%, signal=55%
GO_SKELETAL_MUSCLE_TISSUE_REGENERATION	GO_SKELETAL_MUSCLE_TISSUE_REGENERATION		23	0.52946	1.2855	0.152805	0.297504	1	2768	tags=30%, list=16%, signal=36%
GO_PYRIMIDINE_RIBONUCLEOSIDE_METABOLIC_PROCESS	GO_PYRIMIDINE_RIBONUCLEOSIDE_METABOLIC_PROCESS		28	0.57713	1.61663	0.0177866	0.29765	0.992	1600	tags=18%, list=9%, signal=20%
GO_REGULATION_OF_SYMBIOSIS_ENCOMPASSING_MUTUALISM_THROUGH_PARASITISM	GO_REGULATION_OF_SYMBIOSIS_ENCOMPASSING_MUTUALISM_THROUGH_PARASITISM		186	0.525208	1.63061	0.00764818	0.297678	0.99	3257	tags=33%, list=19%, signal=41%
GO_VASODILATION	GO_VASODILATION		24	0.707725	1.63128	0.00573614	0.299816	0.99	2584	tags=42%, list=15%, signal=49%
GO_PROTEIN_HYDROXYLATION	GO_PROTEIN_HYDROXYLATION		15	0.572741	1.28334	0.207317	0.300226	1	3983	tags=60%, list=23%, signal=78%
GO_GLAND_MORPHOGENESIS	GO_GLAND_MORPHOGENESIS		93	0.440368	1.28339	0.0951456	0.300421	1	3352	tags=35%, list=19%, signal=44%
GO_POSITIVE_REGULATION_OF_T_HELPER_CELL_DIFFERENTIATION	GO_POSITIVE_REGULATION_OF_T_HELPER_CELL_DIFFERENTIATION		18	0.575122	1.28121	0.171206	0.300798	1	1358	tags=28%, list=8%, signal=30%
GO_POSITIVE_REGULATION_OF_STEROID_METABOLIC_PROCESS	GO_POSITIVE_REGULATION_OF_STEROID_METABOLIC_PROCESS		23	0.558914	1.28026	0.182927	0.300957	1	2604	tags=39%, list=15%, signal=46%
GO_REGULATION_OF_ESTABLISHMENT_OF_PLANAR_POLARITY	GO_REGULATION_OF_ESTABLISHMENT_OF_PLANAR_POLARITY		107	0.373147	1.2809	0.11546	0.301005	1	3569	tags=30%, list=21%, signal=38%
GO_POSITIVE_REGULATION_OF_VIRAL_PROCESS	GO_POSITIVE_REGULATION_OF_VIRAL_PROCESS		82	0.353938	1.28124	0.151575	0.301033	1	2499	tags=20%, list=15%, signal=23%
GO_ESTROGEN_METABOLIC_PROCESS	GO_ESTROGEN_METABOLIC_PROCESS		19	0.532872	1.28067	0.190377	0.301085	1	1882	tags=26%, list=11%, signal=30%
GO_RESPIRATORY_SYSTEM_DEVELOPMENT	GO_RESPIRATORY_SYSTEM_DEVELOPMENT		187	0.38912	1.28137	0.040153	0.301122	1	1880	tags=22%, list=11%, signal=24%
GO_LIVER_REGENERATION	GO_LIVER_REGENERATION		19	0.538725	1.28033	0.117063	0.301127	1	1370	tags=32%, list=8%, signal=34%
GO_REGULATION_OF_BONE_REMODELING	GO_REGULATION_OF_BONE_REMODELING		39	0.49697	1.2796	0.118126	0.301166	1	1556	tags=28%, list=9%, signal=31%
GO__DE_NOVO_PROTEIN_FOLDING	GO__DE_NOVO_PROTEIN_FOLDING		16	0.521149	1.28259	0.184701	0.30117	1	4416	tags=50%, list=26%, signal=67%
GO_EXTRINSIC_APOPTOTIC_SIGNALING_PATHWAY_VIA_DEATH_DOMAIN_RECEPTORS	GO_EXTRINSIC_APOPTOTIC_SIGNALING_PATHWAY_VIA_DEATH_DOMAIN_RECEPTORS		37	0.420016	1.27977	0.152263	0.301178	1	2529	tags=27%, list=15%, signal=32%
GO_NEGATIVE_REGULATION_OF_TRANSFORMING_GROWTH_FACTOR_BETA_RECEPTOR_SIGNALING_PATHWAY	GO_NEGATIVE_REGULATION_OF_TRANSFORMING_GROWTH_FACTOR_BETA_RECEPTOR_SIGNALING_PATHWAY		61	0.438373	1.28202	0.137931	0.301212	1	2402	tags=25%, list=14%, signal=28%
GO_POSITIVE_REGULATION_OF_LIPID_METABOLIC_PROCESS	GO_POSITIVE_REGULATION_OF_LIPID_METABOLIC_PROCESS		119	0.408809	1.28145	0.0953347	0.301273	1	3484	tags=33%, list=20%, signal=41%
GO_ENDOTHELIAL_CELL_MIGRATION	GO_ENDOTHELIAL_CELL_MIGRATION		52	0.510219	1.27987	0.136719	0.301303	1	3053	tags=38%, list=18%, signal=47%
GO_RESPONSE_TO_DEXAMETHASONE	GO_RESPONSE_TO_DEXAMETHASONE		33	0.549618	1.28038	0.104651	0.301312	1	1117	tags=30%, list=6%, signal=32%
GO_VASCULAR_ENDOTHELIAL_GROWTH_FACTOR_RECEPTOR_SIGNALING_PATHWAY	GO_VASCULAR_ENDOTHELIAL_GROWTH_FACTOR_RECEPTOR_SIGNALING_PATHWAY		68	0.447666	1.28213	0.140316	0.301324	1	2442	tags=31%, list=14%, signal=36%
GO_INTRINSIC_APOPTOTIC_SIGNALING_PATHWAY_IN_RESPONSE_TO_DNA_DAMAGE_BY_P53_CLASS_MEDIATOR	GO_INTRINSIC_APOPTOTIC_SIGNALING_PATHWAY_IN_RESPONSE_TO_DNA_DAMAGE_BY_P53_CLASS_MEDIATOR		29	0.467972	1.28145	0.167641	0.301555	1	1856	tags=28%, list=11%, signal=31%
GO_CELLULAR_RESPONSE_TO_GAMMA_RADIATION	GO_CELLULAR_RESPONSE_TO_GAMMA_RADIATION		17	0.570668	1.28217	0.16441	0.301569	1	2516	tags=41%, list=15%, signal=48%
GO_REGULATION_OF_T_CELL_MEDIATED_IMMUNITY	GO_REGULATION_OF_T_CELL_MEDIATED_IMMUNITY		47	0.42138	1.2816	0.158103	0.301595	1	4595	tags=51%, list=27%, signal=69%
GO_TAXIS	GO_TAXIS		417	0.411473	1.27906	0.0965909	0.301793	1	2223	tags=24%, list=13%, signal=27%
GO_NEGATIVE_REGULATION_OF_B_CELL_PROLIFERATION	GO_NEGATIVE_REGULATION_OF_B_CELL_PROLIFERATION		15	0.604012	1.27811	0.170132	0.302128	1	2707	tags=47%, list=16%, signal=55%
GO_REGULATION_OF_COAGULATION	GO_REGULATION_OF_COAGULATION		85	0.662868	1.6445	0	0.302238	0.985	1663	tags=31%, list=10%, signal=34%
GO_RETINA_VASCULATURE_DEVELOPMENT_IN_CAMERA_TYPE_EYE	GO_RETINA_VASCULATURE_DEVELOPMENT_IN_CAMERA_TYPE_EYE		16	0.583244	1.2782	0.142292	0.3023	1	1487	tags=38%, list=9%, signal=41%
GO_POSITIVE_REGULATION_OF_PROTEIN_LOCALIZATION_TO_NUCLEUS	GO_POSITIVE_REGULATION_OF_PROTEIN_LOCALIZATION_TO_NUCLEUS		119	0.412854	1.2783	0.106855	0.302424	1	3053	tags=27%, list=18%, signal=32%
GO_PROTEIN_HOMOTRIMERIZATION	GO_PROTEIN_HOMOTRIMERIZATION		18	0.681608	1.63174	0.00584795	0.302571	0.99	1330	tags=22%, list=8%, signal=24%
GO_POSITIVE_REGULATION_OF_ESTABLISHMENT_OF_PROTEIN_LOCALIZATION	GO_POSITIVE_REGULATION_OF_ESTABLISHMENT_OF_PROTEIN_LOCALIZATION		459	0.344652	1.27835	0.0705882	0.302621	1	3694	tags=30%, list=21%, signal=37%
GO_OVARIAN_FOLLICLE_DEVELOPMENT	GO_OVARIAN_FOLLICLE_DEVELOPMENT		58	0.390934	1.27714	0.116981	0.303093	1	2940	tags=24%, list=17%, signal=29%
GO_DRUG_TRANSMEMBRANE_TRANSPORT	GO_DRUG_TRANSMEMBRANE_TRANSPORT		18	0.588015	1.27622	0.178161	0.30314	1	2403	tags=33%, list=14%, signal=39%
GO_POSITIVE_REGULATION_OF_KINASE_ACTIVITY	GO_POSITIVE_REGULATION_OF_KINASE_ACTIVITY		446	0.345848	1.27637	0.0433071	0.303189	1	2619	tags=23%, list=15%, signal=26%
GO_NEGATIVE_REGULATION_OF_INTERLEUKIN_12_PRODUCTION	GO_NEGATIVE_REGULATION_OF_INTERLEUKIN_12_PRODUCTION		15	0.578694	1.27723	0.22093	0.303233	1	3458	tags=40%, list=20%, signal=50%
GO_RESPONSE_TO_PURINE_CONTAINING_COMPOUND	GO_RESPONSE_TO_PURINE_CONTAINING_COMPOUND		152	0.404139	1.27651	0.0978044	0.303239	1	2347	tags=24%, list=14%, signal=27%
GO_NEGATIVE_REGULATION_OF_VIRAL_TRANSCRIPTION	GO_NEGATIVE_REGULATION_OF_VIRAL_TRANSCRIPTION		23	0.446159	1.27681	0.154135	0.303332	1	1091	tags=22%, list=6%, signal=23%
GO_CELLULAR_RESPONSE_TO_NITROGEN_COMPOUND	GO_CELLULAR_RESPONSE_TO_NITROGEN_COMPOUND		467	0.343836	1.27652	0.0408998	0.303506	1	3084	tags=26%, list=18%, signal=30%
GO_LEUKOCYTE_CELL_CELL_ADHESION	GO_LEUKOCYTE_CELL_CELL_ADHESION		243	0.573029	1.63845	0.00570342	0.303758	0.99	3095	tags=38%, list=18%, signal=46%
GO_REGULATION_OF_DNA_RECOMBINATION	GO_REGULATION_OF_DNA_RECOMBINATION		50	0.418063	1.27332	0.184557	0.303773	1	5409	tags=46%, list=31%, signal=67%
GO_RESPONSE_TO_ORGANOPHOSPHORUS	GO_RESPONSE_TO_ORGANOPHOSPHORUS		135	0.405122	1.27291	0.0951456	0.303881	1	2347	tags=24%, list=14%, signal=28%
GO_OVULATION_CYCLE	GO_OVULATION_CYCLE		110	0.407539	1.27342	0.0756972	0.303893	1	2733	tags=26%, list=16%, signal=31%
GO_POSITIVE_REGULATION_OF_PROTEIN_SERINE_THREONINE_KINASE_ACTIVITY	GO_POSITIVE_REGULATION_OF_PROTEIN_SERINE_THREONINE_KINASE_ACTIVITY		269	0.35464	1.27305	0.0441767	0.303915	1	3239	tags=27%, list=19%, signal=33%
GO_THYROID_GLAND_DEVELOPMENT	GO_THYROID_GLAND_DEVELOPMENT		25	0.455273	1.27404	0.186139	0.304027	1	2464	tags=20%, list=14%, signal=23%
GO_POSITIVE_REGULATION_OF_B_CELL_MEDIATED_IMMUNITY	GO_POSITIVE_REGULATION_OF_B_CELL_MEDIATED_IMMUNITY		23	0.672401	1.63688	0.00803213	0.304107	0.99	2602	tags=35%, list=15%, signal=41%
GO_POSITIVE_REGULATION_OF_PROTEIN_IMPORT	GO_POSITIVE_REGULATION_OF_PROTEIN_IMPORT		95	0.432621	1.27345	0.117647	0.304119	1	3637	tags=37%, list=21%, signal=46%
GO_AUTOPHAGY	GO_AUTOPHAGY		341	0.296907	1.27357	0.0792683	0.304219	1	2430	tags=18%, list=14%, signal=20%
GO_MYELOID_CELL_ACTIVATION_INVOLVED_IN_IMMUNE_RESPONSE	GO_MYELOID_CELL_ACTIVATION_INVOLVED_IN_IMMUNE_RESPONSE		39	0.566183	1.27372	0.209302	0.304248	1	3046	tags=49%, list=18%, signal=59%
GO_CELLULAR_RESPONSE_TO_ALCOHOL	GO_CELLULAR_RESPONSE_TO_ALCOHOL		109	0.42929	1.27404	0.0607211	0.304298	1	2285	tags=26%, list=13%, signal=29%
GO_OSTEOBLAST_DIFFERENTIATION	GO_OSTEOBLAST_DIFFERENTIATION		115	0.415162	1.2752	0.0816733	0.304409	1	1311	tags=21%, list=8%, signal=22%
GO_MAMMARY_GLAND_EPITHELIAL_CELL_DIFFERENTIATION	GO_MAMMARY_GLAND_EPITHELIAL_CELL_DIFFERENTIATION		15	0.526368	1.27427	0.159681	0.304494	1	4080	tags=47%, list=24%, signal=61%
GO_NEGATIVE_REGULATION_OF_SECRETION	GO_NEGATIVE_REGULATION_OF_SECRETION		188	0.397521	1.27405	0.0891473	0.30456	1	2929	tags=30%, list=17%, signal=36%
GO_ACTIVATION_OF_GTPASE_ACTIVITY	GO_ACTIVATION_OF_GTPASE_ACTIVITY		70	0.356488	1.27493	0.118547	0.304564	1	2981	tags=27%, list=17%, signal=33%
GO_PHAGOSOME_MATURATION	GO_PHAGOSOME_MATURATION		36	0.433465	1.2743	0.168033	0.304726	1	1245	tags=19%, list=7%, signal=21%
GO_ACTIVATION_OF_MAPKK_ACTIVITY	GO_ACTIVATION_OF_MAPKK_ACTIVITY		47	0.392463	1.27459	0.119374	0.304838	1	3637	tags=30%, list=21%, signal=38%
GO_NEGATIVE_REGULATION_OF_HOMEOSTATIC_PROCESS	GO_NEGATIVE_REGULATION_OF_HOMEOSTATIC_PROCESS		119	0.356229	1.27097	0.118	0.304888	1	2511	tags=23%, list=15%, signal=26%
GO_ORGANIC_HYDROXY_COMPOUND_METABOLIC_PROCESS	GO_ORGANIC_HYDROXY_COMPOUND_METABOLIC_PROCESS		451	0.332735	1.27435	0.0961924	0.304938	1	3129	tags=22%, list=18%, signal=26%
GO_PEPTIDYL_PROLINE_MODIFICATION	GO_PEPTIDYL_PROLINE_MODIFICATION		44	0.435375	1.27128	0.15619	0.304965	1	2484	tags=30%, list=14%, signal=34%
GO_REGULATION_OF_NATURAL_KILLER_CELL_MEDIATED_IMMUNITY	GO_REGULATION_OF_NATURAL_KILLER_CELL_MEDIATED_IMMUNITY		31	0.46791	1.27109	0.177606	0.304981	1	3873	tags=42%, list=23%, signal=54%
GO_FACE_DEVELOPMENT	GO_FACE_DEVELOPMENT		48	0.448675	1.27142	0.125	0.305034	1	2428	tags=33%, list=14%, signal=39%
GO_MESODERM_MORPHOGENESIS	GO_MESODERM_MORPHOGENESIS		63	0.411023	1.27179	0.112621	0.305037	1	3039	tags=29%, list=18%, signal=35%
GO_NEGATIVE_REGULATION_OF_EMBRYONIC_DEVELOPMENT	GO_NEGATIVE_REGULATION_OF_EMBRYONIC_DEVELOPMENT		25	0.56014	1.27049	0.139918	0.305095	1	655	tags=20%, list=4%, signal=21%
GO_VASCULOGENESIS	GO_VASCULOGENESIS		56	0.489277	1.27193	0.152805	0.305109	1	3365	tags=43%, list=20%, signal=53%
GO_AMINO_SUGAR_METABOLIC_PROCESS	GO_AMINO_SUGAR_METABOLIC_PROCESS		37	0.660632	1.63507	0.0037594	0.30516	0.99	3205	tags=41%, list=19%, signal=50%
GO_RESPONSE_TO_CARBOHYDRATE	GO_RESPONSE_TO_CARBOHYDRATE		159	0.376341	1.27148	0.112676	0.305232	1	2387	tags=25%, list=14%, signal=29%
GO_PHAGOCYTOSIS_ENGULFMENT	GO_PHAGOCYTOSIS_ENGULFMENT		23	0.652464	1.2705	0.167323	0.305352	1	1704	tags=52%, list=10%, signal=58%
GO_ACTIVATION_OF_NF_KAPPAB_INDUCING_KINASE_ACTIVITY	GO_ACTIVATION_OF_NF_KAPPAB_INDUCING_KINASE_ACTIVITY		17	0.701491	1.63209	0.00585938	0.305657	0.99	2043	tags=29%, list=12%, signal=33%
GO_POSITIVE_REGULATION_OF_INTERLEUKIN_2_PRODUCTION	GO_POSITIVE_REGULATION_OF_INTERLEUKIN_2_PRODUCTION		30	0.667199	1.63898	0.00585938	0.306333	0.99	1980	tags=37%, list=12%, signal=41%
GO_T_CELL_ACTIVATION_INVOLVED_IN_IMMUNE_RESPONSE	GO_T_CELL_ACTIVATION_INVOLVED_IN_IMMUNE_RESPONSE		56	0.593269	1.64463	0.0192678	0.306483	0.985	3026	tags=32%, list=18%, signal=39%
GO_REGULATION_OF_INTERLEUKIN_17_PRODUCTION	GO_REGULATION_OF_INTERLEUKIN_17_PRODUCTION		22	0.722836	1.64012	0.0171103	0.307125	0.99	834	tags=27%, list=5%, signal=29%
GO_NEGATIVE_REGULATION_OF_ALPHA_BETA_T_CELL_ACTIVATION	GO_NEGATIVE_REGULATION_OF_ALPHA_BETA_T_CELL_ACTIVATION		21	0.712669	1.63271	0.00576923	0.307785	0.99	1806	tags=38%, list=10%, signal=43%
GO_REGULATION_OF_LEUKOCYTE_MEDIATED_CYTOTOXICITY	GO_REGULATION_OF_LEUKOCYTE_MEDIATED_CYTOTOXICITY		49	0.450257	1.26828	0.189922	0.307841	1	4064	tags=45%, list=24%, signal=59%
GO_MRNA_CLEAVAGE	GO_MRNA_CLEAVAGE		17	0.449047	1.26862	0.192607	0.307874	1	1682	tags=18%, list=10%, signal=20%
GO_POSITIVE_REGULATION_OF_SECRETION	GO_POSITIVE_REGULATION_OF_SECRETION		344	0.376345	1.26836	0.0898204	0.307981	1	2357	tags=22%, list=14%, signal=25%
GO_GLUCOSE_6_PHOSPHATE_METABOLIC_PROCESS	GO_GLUCOSE_6_PHOSPHATE_METABOLIC_PROCESS		21	0.64063	1.64524	0.0152381	0.309117	0.985	3882	tags=52%, list=23%, signal=68%
GO_REGULATION_OF_LIPID_METABOLIC_PROCESS	GO_REGULATION_OF_LIPID_METABOLIC_PROCESS		252	0.355019	1.26717	0.0745968	0.309297	1	3194	tags=28%, list=19%, signal=34%
GO_CHAPERONE_MEDIATED_PROTEIN_FOLDING	GO_CHAPERONE_MEDIATED_PROTEIN_FOLDING		44	0.398419	1.26648	0.185328	0.310073	1	2480	tags=27%, list=14%, signal=32%
GO_AROMATIC_AMINO_ACID_FAMILY_CATABOLIC_PROCESS	GO_AROMATIC_AMINO_ACID_FAMILY_CATABOLIC_PROCESS		16	0.581721	1.26556	0.179435	0.310177	1	1963	tags=50%, list=11%, signal=56%
GO_PHOSPHOLIPID_CATABOLIC_PROCESS	GO_PHOSPHOLIPID_CATABOLIC_PROCESS		26	0.498359	1.26587	0.187251	0.310229	1	4224	tags=46%, list=25%, signal=61%
GO_POSITIVE_REGULATION_OF_ATPASE_ACTIVITY	GO_POSITIVE_REGULATION_OF_ATPASE_ACTIVITY		38	0.407678	1.2662	0.14741	0.310241	1	4062	tags=37%, list=24%, signal=48%
GO_REGULATION_OF_CELLULAR_AMINO_ACID_METABOLIC_PROCESS	GO_REGULATION_OF_CELLULAR_AMINO_ACID_METABOLIC_PROCESS		63	0.360775	1.26563	0.252372	0.310339	1	2970	tags=21%, list=17%, signal=25%
GO_POSITIVE_REGULATION_OF_INTRINSIC_APOPTOTIC_SIGNALING_PATHWAY	GO_POSITIVE_REGULATION_OF_INTRINSIC_APOPTOTIC_SIGNALING_PATHWAY		46	0.400309	1.26594	0.177606	0.310392	1	3452	tags=33%, list=20%, signal=41%
GO_REGULATION_OF_INTERLEUKIN_2_PRODUCTION	GO_REGULATION_OF_INTERLEUKIN_2_PRODUCTION		46	0.636757	1.64057	0.00584795	0.31056	0.989	1980	tags=33%, list=12%, signal=37%
GO_DOPAMINERGIC_NEURON_DIFFERENTIATION	GO_DOPAMINERGIC_NEURON_DIFFERENTIATION		26	0.508658	1.26451	0.132411	0.311537	1	1737	tags=19%, list=10%, signal=21%
GO_NEGATIVE_REGULATION_OF_CALCIUM_ION_TRANSPORT	GO_NEGATIVE_REGULATION_OF_CALCIUM_ION_TRANSPORT		46	0.437438	1.26397	0.16441	0.312153	1	2994	tags=28%, list=17%, signal=34%
GO_REGULATION_OF_POSTTRANSCRIPTIONAL_GENE_SILENCING	GO_REGULATION_OF_POSTTRANSCRIPTIONAL_GENE_SILENCING		17	0.409471	1.26362	0.200397	0.312179	1	2866	tags=24%, list=17%, signal=28%
GO_MANNOSYLATION	GO_MANNOSYLATION		21	0.474193	1.26322	0.214429	0.312304	1	4487	tags=52%, list=26%, signal=71%
GO_NEGATIVE_REGULATION_OF_CELLULAR_RESPONSE_TO_GROWTH_FACTOR_STIMULUS	GO_NEGATIVE_REGULATION_OF_CELLULAR_RESPONSE_TO_GROWTH_FACTOR_STIMULUS		110	0.436889	1.26337	0.141988	0.312326	1	2402	tags=26%, list=14%, signal=30%
GO_NEGATIVE_REGULATION_OF_MAP_KINASE_ACTIVITY	GO_NEGATIVE_REGULATION_OF_MAP_KINASE_ACTIVITY		72	0.424741	1.26369	0.132673	0.312354	1	3528	tags=39%, list=21%, signal=49%
GO_DEFENSE_RESPONSE_TO_GRAM_POSITIVE_BACTERIUM	GO_DEFENSE_RESPONSE_TO_GRAM_POSITIVE_BACTERIUM		58	0.458652	1.26257	0.153386	0.313069	1	2598	tags=26%, list=15%, signal=30%
GO_REGULATION_OF_PEPTIDYL_SERINE_PHOSPHORYLATION_OF_STAT_PROTEIN	GO_REGULATION_OF_PEPTIDYL_SERINE_PHOSPHORYLATION_OF_STAT_PROTEIN		17	0.582629	1.64545	0.0220884	0.31336	0.984	148	tags=6%, list=1%, signal=6%
GO_REGULATION_OF_CHONDROCYTE_DIFFERENTIATION	GO_REGULATION_OF_CHONDROCYTE_DIFFERENTIATION		38	0.462774	1.26218	0.115385	0.313411	1	3499	tags=37%, list=20%, signal=46%
GO_MONOCARBOXYLIC_ACID_BIOSYNTHETIC_PROCESS	GO_MONOCARBOXYLIC_ACID_BIOSYNTHETIC_PROCESS		151	0.398736	1.26186	0.116	0.313655	1	2901	tags=27%, list=17%, signal=32%
GO_POSITIVE_REGULATION_OF_INTRACELLULAR_TRANSPORT	GO_POSITIVE_REGULATION_OF_INTRACELLULAR_TRANSPORT		327	0.342368	1.26156	0.0690377	0.313877	1	2955	tags=23%, list=17%, signal=28%
GO_CELLULAR_GLUCOSE_HOMEOSTASIS	GO_CELLULAR_GLUCOSE_HOMEOSTASIS		72	0.396117	1.26116	0.114108	0.314266	1	1400	tags=24%, list=8%, signal=26%
GO_REGULATION_OF_EARLY_ENDOSOME_TO_LATE_ENDOSOME_TRANSPORT	GO_REGULATION_OF_EARLY_ENDOSOME_TO_LATE_ENDOSOME_TRANSPORT		16	0.43654	1.26058	0.218075	0.314891	1	2235	tags=13%, list=13%, signal=14%
GO_ANTIGEN_PROCESSING_AND_PRESENTATION_VIA_MHC_CLASS_IB	GO_ANTIGEN_PROCESSING_AND_PRESENTATION_VIA_MHC_CLASS_IB		15	0.532967	1.26021	0.225869	0.315209	1	5031	tags=53%, list=29%, signal=75%
GO_NEGATIVE_REGULATION_OF_BEHAVIOR	GO_NEGATIVE_REGULATION_OF_BEHAVIOR		17	0.464835	1.26005	0.159615	0.315214	1	2059	tags=24%, list=12%, signal=27%
GO_GLAND_DEVELOPMENT	GO_GLAND_DEVELOPMENT		377	0.350981	1.25964	0.0728347	0.315311	1	2357	tags=21%, list=14%, signal=23%
GO_VESICLE_MEDIATED_TRANSPORT_BETWEEN_ENDOSOMAL_COMPARTMENTS	GO_VESICLE_MEDIATED_TRANSPORT_BETWEEN_ENDOSOMAL_COMPARTMENTS		19	0.448856	1.25976	0.176353	0.315375	1	3887	tags=37%, list=23%, signal=48%
GO_PROTEIN_EXIT_FROM_ENDOPLASMIC_RETICULUM	GO_PROTEIN_EXIT_FROM_ENDOPLASMIC_RETICULUM		18	0.623932	1.64895	0.0386847	0.317239	0.982	6084	tags=89%, list=35%, signal=137%
GO_NEGATIVE_REGULATION_OF_PROTEOLYSIS	GO_NEGATIVE_REGULATION_OF_PROTEOLYSIS		299	0.510809	1.64568	0	0.317573	0.984	2736	tags=26%, list=16%, signal=30%
GO_CELLULAR_EXTRAVASATION	GO_CELLULAR_EXTRAVASATION		22	0.583815	1.258	0.174257	0.31765	1	3216	tags=45%, list=19%, signal=56%
GO_ADAPTATION_OF_SIGNALING_PATHWAY	GO_ADAPTATION_OF_SIGNALING_PATHWAY		19	0.478756	1.25748	0.171875	0.318203	1	1644	tags=11%, list=10%, signal=12%
GO_POSITIVE_T_CELL_SELECTION	GO_POSITIVE_T_CELL_SELECTION		21	0.673374	1.65172	0.0149533	0.318648	0.982	2846	tags=33%, list=17%, signal=40%
GO_REGULATION_OF_ADHERENS_JUNCTION_ORGANIZATION	GO_REGULATION_OF_ADHERENS_JUNCTION_ORGANIZATION		46	0.435331	1.25701	0.126016	0.318713	1	3456	tags=35%, list=20%, signal=43%
GO_B_CELL_DIFFERENTIATION	GO_B_CELL_DIFFERENTIATION		83	0.355505	1.25668	0.159844	0.318977	1	3347	tags=25%, list=19%, signal=31%
GO_RECEPTOR_INTERNALIZATION	GO_RECEPTOR_INTERNALIZATION		45	0.500814	1.25601	0.162376	0.319438	1	2840	tags=27%, list=17%, signal=32%
GO_ALCOHOL_BIOSYNTHETIC_PROCESS	GO_ALCOHOL_BIOSYNTHETIC_PROCESS		101	0.371481	1.25619	0.11245	0.31947	1	2798	tags=25%, list=16%, signal=29%
GO_ODONTOGENESIS	GO_ODONTOGENESIS		100	0.442137	1.2555	0.120553	0.320008	1	3499	tags=37%, list=20%, signal=46%
GO_REGULATION_OF_MITOCHONDRION_ORGANIZATION	GO_REGULATION_OF_MITOCHONDRION_ORGANIZATION		188	0.311462	1.25528	0.10338	0.320076	1	3479	tags=27%, list=20%, signal=33%
GO_POSITIVE_REGULATION_OF_PROTEIN_MODIFICATION_BY_SMALL_PROTEIN_CONJUGATION_OR_REMOVAL	GO_POSITIVE_REGULATION_OF_PROTEIN_MODIFICATION_BY_SMALL_PROTEIN_CONJUGATION_OR_REMOVAL		176	0.346613	1.25432	0.168932	0.321087	1	3569	tags=23%, list=21%, signal=29%
GO_BLOOD_COAGULATION_FIBRIN_CLOT_FORMATION	GO_BLOOD_COAGULATION_FIBRIN_CLOT_FORMATION		24	0.650512	1.64936	0.0132325	0.321103	0.982	2741	tags=25%, list=16%, signal=30%
GO_NUCLEOPHAGY	GO_NUCLEOPHAGY		16	0.408566	1.25443	0.234375	0.321191	1	4690	tags=31%, list=27%, signal=43%
GO_AMMONIUM_ION_METABOLIC_PROCESS	GO_AMMONIUM_ION_METABOLIC_PROCESS		152	0.361515	1.25392	0.116142	0.321433	1	3100	tags=26%, list=18%, signal=32%
GO_RESPONSE_TO_VIRUS	GO_RESPONSE_TO_VIRUS		219	0.622871	1.65254	0.00954198	0.321975	0.982	2910	tags=39%, list=17%, signal=46%
GO_COFACTOR_CATABOLIC_PROCESS	GO_COFACTOR_CATABOLIC_PROCESS		17	0.474646	1.25339	0.19685	0.321983	1	2783	tags=29%, list=16%, signal=35%
GO_POSITIVE_REGULATION_OF_EPITHELIAL_CELL_APOPTOTIC_PROCESS	GO_POSITIVE_REGULATION_OF_EPITHELIAL_CELL_APOPTOTIC_PROCESS		21	0.545001	1.25298	0.189824	0.322358	1	3041	tags=52%, list=18%, signal=64%
GO_ACUTE_PHASE_RESPONSE	GO_ACUTE_PHASE_RESPONSE		40	0.729335	1.64581	0.00386847	0.32238	0.984	1427	tags=33%, list=8%, signal=35%
GO_REGULATION_OF_NEUROBLAST_PROLIFERATION	GO_REGULATION_OF_NEUROBLAST_PROLIFERATION		27	0.522541	1.25279	0.148148	0.322381	1	4107	tags=52%, list=24%, signal=68%
GO_BONE_MORPHOGENESIS	GO_BONE_MORPHOGENESIS		75	0.460606	1.25231	0.114786	0.322887	1	3499	tags=41%, list=20%, signal=52%
GO_PHAGOCYTOSIS_RECOGNITION	GO_PHAGOCYTOSIS_RECOGNITION		21	0.631437	1.25166	0.180077	0.323655	1	3567	tags=48%, list=21%, signal=60%
GO_CELLULAR_RESPONSE_TO_VASCULAR_ENDOTHELIAL_GROWTH_FACTOR_STIMULUS	GO_CELLULAR_RESPONSE_TO_VASCULAR_ENDOTHELIAL_GROWTH_FACTOR_STIMULUS		28	0.528685	1.25052	0.189349	0.324391	1	3755	tags=54%, list=22%, signal=68%
GO_SKELETAL_MUSCLE_CELL_DIFFERENTIATION	GO_SKELETAL_MUSCLE_CELL_DIFFERENTIATION		48	0.434197	1.2506	0.12326	0.324531	1	1305	tags=23%, list=8%, signal=25%
GO_REGULATION_OF_CELLULAR_RESPONSE_TO_GROWTH_FACTOR_STIMULUS	GO_REGULATION_OF_CELLULAR_RESPONSE_TO_GROWTH_FACTOR_STIMULUS		208	0.392744	1.25083	0.0918164	0.324695	1	2402	tags=26%, list=14%, signal=30%
GO_ORGAN_GROWTH	GO_ORGAN_GROWTH		62	0.41803	1.24992	0.133874	0.324756	1	2464	tags=24%, list=14%, signal=28%
GO_GLUTATHIONE_DERIVATIVE_METABOLIC_PROCESS	GO_GLUTATHIONE_DERIVATIVE_METABOLIC_PROCESS		18	0.563189	1.25063	0.206	0.324767	1	2653	tags=44%, list=15%, signal=52%
GO_CELLULAR_RESPONSE_TO_INTERLEUKIN_6	GO_CELLULAR_RESPONSE_TO_INTERLEUKIN_6		21	0.504804	1.25008	0.168605	0.324786	1	3216	tags=38%, list=19%, signal=47%
GO_MESODERMAL_CELL_DIFFERENTIATION	GO_MESODERMAL_CELL_DIFFERENTIATION		25	0.501223	1.24913	0.141717	0.325448	1	1579	tags=24%, list=9%, signal=26%
GO_RESPONSE_TO_NITRIC_OXIDE	GO_RESPONSE_TO_NITRIC_OXIDE		20	0.503471	1.24887	0.144213	0.325582	1	2592	tags=30%, list=15%, signal=35%
GO_RESPONSE_TO_PH	GO_RESPONSE_TO_PH		34	0.463405	1.24921	0.171937	0.325617	1	3470	tags=38%, list=20%, signal=48%
GO_NEGATIVE_REGULATION_OF_LEUKOCYTE_MIGRATION	GO_NEGATIVE_REGULATION_OF_LEUKOCYTE_MIGRATION		28	0.520678	1.24864	0.141176	0.325642	1	2301	tags=39%, list=13%, signal=45%
GO_SYNAPTIC_TRANSMISSION_CHOLINERGIC	GO_SYNAPTIC_TRANSMISSION_CHOLINERGIC		33	0.405092	1.24835	0.162839	0.325865	1	1148	tags=9%, list=7%, signal=10%
GO_REGULATION_OF_ERBB_SIGNALING_PATHWAY	GO_REGULATION_OF_ERBB_SIGNALING_PATHWAY		75	0.359731	1.24814	0.108163	0.325908	1	2676	tags=24%, list=16%, signal=28%
GO_REGULATION_OF_ANATOMICAL_STRUCTURE_SIZE	GO_REGULATION_OF_ANATOMICAL_STRUCTURE_SIZE		441	0.341376	1.24759	0.0979592	0.326208	1	3484	tags=28%, list=20%, signal=34%
GO_POSITIVE_REGULATION_OF_MAP_KINASE_ACTIVITY	GO_POSITIVE_REGULATION_OF_MAP_KINASE_ACTIVITY		192	0.356595	1.24769	0.0901804	0.326331	1	3990	tags=34%, list=23%, signal=44%
GO_POSITIVE_REGULATION_OF_ACTIN_CYTOSKELETON_REORGANIZATION	GO_POSITIVE_REGULATION_OF_ACTIN_CYTOSKELETON_REORGANIZATION		16	0.471114	1.24701	0.203629	0.326361	1	1387	tags=19%, list=8%, signal=20%
GO_REGULATION_OF_HISTONE_DEACETYLATION	GO_REGULATION_OF_HISTONE_DEACETYLATION		22	0.476635	1.24706	0.220648	0.326571	1	4041	tags=45%, list=23%, signal=59%
GO_OVULATION	GO_OVULATION		17	0.608998	1.2472	0.199241	0.32659	1	2288	tags=47%, list=13%, signal=54%
GO_REGULATION_OF_LIPID_BIOSYNTHETIC_PROCESS	GO_REGULATION_OF_LIPID_BIOSYNTHETIC_PROCESS		119	0.37891	1.24642	0.0983607	0.326758	1	3041	tags=32%, list=18%, signal=39%
GO_PROTEIN_DEGLYCOSYLATION	GO_PROTEIN_DEGLYCOSYLATION		20	0.72841	1.65284	0.00817996	0.326761	0.982	3629	tags=60%, list=21%, signal=76%
GO_CELLULAR_RESPONSE_TO_PEPTIDE	GO_CELLULAR_RESPONSE_TO_PEPTIDE		257	0.317963	1.24583	0.0745098	0.326865	1	3481	tags=26%, list=20%, signal=32%
GO_MULTI_ORGANISM_MEMBRANE_ORGANIZATION	GO_MULTI_ORGANISM_MEMBRANE_ORGANIZATION		28	0.387359	1.24616	0.197605	0.326885	1	2848	tags=21%, list=17%, signal=26%
GO_REGULATION_OF_PROTEIN_SECRETION	GO_REGULATION_OF_PROTEIN_SECRETION		359	0.353518	1.24648	0.120858	0.326962	1	2929	tags=25%, list=17%, signal=29%
GO_POSITIVE_REGULATION_OF_PHOSPHOLIPASE_ACTIVITY	GO_POSITIVE_REGULATION_OF_PHOSPHOLIPASE_ACTIVITY		51	0.4821	1.24585	0.147348	0.327126	1	3637	tags=43%, list=21%, signal=55%
GO_PREASSEMBLY_OF_GPI_ANCHOR_IN_ER_MEMBRANE	GO_PREASSEMBLY_OF_GPI_ANCHOR_IN_ER_MEMBRANE		15	0.494133	1.24458	0.232143	0.327505	1	5146	tags=53%, list=30%, signal=76%
GO_FC_RECEPTOR_SIGNALING_PATHWAY	GO_FC_RECEPTOR_SIGNALING_PATHWAY		179	0.339094	1.24526	0.220077	0.32752	1	2715	tags=22%, list=16%, signal=26%
GO_AMINE_CATABOLIC_PROCESS	GO_AMINE_CATABOLIC_PROCESS		18	0.492953	1.24473	0.197154	0.327551	1	2964	tags=39%, list=17%, signal=47%
GO_PEPTIDYL_TYROSINE_MODIFICATION	GO_PEPTIDYL_TYROSINE_MODIFICATION		177	0.339405	1.24436	0.0925197	0.327589	1	2456	tags=20%, list=14%, signal=23%
GO_RIBONUCLEOSIDE_DIPHOSPHATE_METABOLIC_PROCESS	GO_RIBONUCLEOSIDE_DIPHOSPHATE_METABOLIC_PROCESS		58	0.40933	1.24505	0.190871	0.327599	1	4039	tags=41%, list=23%, signal=54%
GO_REGULATION_OF_CATENIN_IMPORT_INTO_NUCLEUS	GO_REGULATION_OF_CATENIN_IMPORT_INTO_NUCLEUS		25	0.537026	1.24484	0.151951	0.327653	1	1536	tags=24%, list=9%, signal=26%
GO_CELL_GROWTH	GO_CELL_GROWTH		129	0.378516	1.24375	0.0750507	0.32806	1	3513	tags=34%, list=20%, signal=43%
GO_REGULATION_OF_PHOSPHOLIPASE_C_ACTIVITY	GO_REGULATION_OF_PHOSPHOLIPASE_C_ACTIVITY		38	0.487569	1.24382	0.154902	0.328224	1	3868	tags=45%, list=22%, signal=58%
GO_POSITIVE_REGULATION_OF_NUCLEOCYTOPLASMIC_TRANSPORT	GO_POSITIVE_REGULATION_OF_NUCLEOCYTOPLASMIC_TRANSPORT		112	0.405575	1.24348	0.119433	0.328242	1	3053	tags=29%, list=18%, signal=36%
GO_SUPEROXIDE_METABOLIC_PROCESS	GO_SUPEROXIDE_METABOLIC_PROCESS		31	0.702794	1.66308	0	0.328551	0.972	1908	tags=35%, list=11%, signal=40%
GO_NUCLEOTIDE_TRANSPORT	GO_NUCLEOTIDE_TRANSPORT		23	0.415589	1.24212	0.16441	0.329559	1	3968	tags=48%, list=23%, signal=62%
GO_PHOSPHATIDYLINOSITOL_METABOLIC_PROCESS	GO_PHOSPHATIDYLINOSITOL_METABOLIC_PROCESS		178	0.322589	1.24219	0.11	0.329728	1	3129	tags=24%, list=18%, signal=29%
GO_LYMPHOCYTE_COSTIMULATION	GO_LYMPHOCYTE_COSTIMULATION		71	0.456456	1.24232	0.227006	0.329805	1	3662	tags=44%, list=21%, signal=55%
GO_PROTEIN_HOMOTETRAMERIZATION	GO_PROTEIN_HOMOTETRAMERIZATION		56	0.378437	1.2417	0.127202	0.329942	1	4048	tags=38%, list=24%, signal=49%
GO_COPPER_ION_TRANSPORT	GO_COPPER_ION_TRANSPORT		18	0.596124	1.24133	0.22288	0.33024	1	2403	tags=44%, list=14%, signal=52%
GO_REGULATION_OF_TRIGLYCERIDE_BIOSYNTHETIC_PROCESS	GO_REGULATION_OF_TRIGLYCERIDE_BIOSYNTHETIC_PROCESS		17	0.498823	1.24105	0.177489	0.330439	1	1218	tags=24%, list=7%, signal=25%
GO_CELLULAR_COMPONENT_MAINTENANCE	GO_CELLULAR_COMPONENT_MAINTENANCE		17	0.474756	1.23976	0.186335	0.331202	1	1124	tags=24%, list=7%, signal=25%
GO_CHONDROCYTE_DEVELOPMENT	GO_CHONDROCYTE_DEVELOPMENT		21	0.545301	1.23999	0.196532	0.331372	1	2402	tags=38%, list=14%, signal=44%
GO_TOXIN_TRANSPORT	GO_TOXIN_TRANSPORT		35	0.371936	1.23976	0.152941	0.33148	1	2328	tags=17%, list=14%, signal=20%
GO_RENAL_SYSTEM_VASCULATURE_DEVELOPMENT	GO_RENAL_SYSTEM_VASCULATURE_DEVELOPMENT		19	0.616906	1.24026	0.22549	0.331499	1	3405	tags=63%, list=20%, signal=79%
GO_REGULATION_OF_PROTEIN_CATABOLIC_PROCESS	GO_REGULATION_OF_PROTEIN_CATABOLIC_PROCESS		360	0.315485	1.24007	0.130859	0.331511	1	4178	tags=30%, list=24%, signal=39%
GO_ACTIN_MYOSIN_FILAMENT_SLIDING	GO_ACTIN_MYOSIN_FILAMENT_SLIDING		38	0.38806	1.2394	0.185547	0.331545	1	1630	tags=13%, list=9%, signal=15%
GO_HUMORAL_IMMUNE_RESPONSE	GO_HUMORAL_IMMUNE_RESPONSE		140	0.659651	1.65317	0.00190114	0.331702	0.982	1381	tags=27%, list=8%, signal=29%
GO_LYMPH_NODE_DEVELOPMENT	GO_LYMPH_NODE_DEVELOPMENT		16	0.575588	1.23708	0.223108	0.332262	1	3905	tags=50%, list=23%, signal=65%
GO_CELLULAR_RESPONSE_TO_DRUG	GO_CELLULAR_RESPONSE_TO_DRUG		64	0.380344	1.23716	0.136187	0.332418	1	1780	tags=22%, list=10%, signal=24%
GO_MORPHOGENESIS_OF_AN_EPITHELIUM	GO_MORPHOGENESIS_OF_AN_EPITHELIUM		376	0.370888	1.23841	0.105058	0.332591	1	3530	tags=33%, list=21%, signal=40%
GO_NEGATIVE_REGULATION_OF_EPITHELIAL_CELL_MIGRATION	GO_NEGATIVE_REGULATION_OF_EPITHELIAL_CELL_MIGRATION		51	0.442275	1.2372	0.188492	0.332621	1	2476	tags=25%, list=14%, signal=30%
GO_RESPONSE_TO_ALKALOID	GO_RESPONSE_TO_ALKALOID		131	0.379637	1.2381	0.0955285	0.332796	1	2192	tags=18%, list=13%, signal=21%
GO_PROTEIN_KINASE_B_SIGNALING	GO_PROTEIN_KINASE_B_SIGNALING		33	0.50212	1.23661	0.205479	0.332811	1	2602	tags=39%, list=15%, signal=46%
GO_ENDOTHELIAL_CELL_DEVELOPMENT	GO_ENDOTHELIAL_CELL_DEVELOPMENT		43	0.448638	1.23841	0.158103	0.332863	1	2407	tags=35%, list=14%, signal=40%
GO_POSITIVE_REGULATION_OF_INTERLEUKIN_4_PRODUCTION	GO_POSITIVE_REGULATION_OF_INTERLEUKIN_4_PRODUCTION		19	0.552499	1.23721	0.257367	0.332869	1	2275	tags=42%, list=13%, signal=48%
GO_NEGATIVE_REGULATION_OF_PROTEIN_SECRETION	GO_NEGATIVE_REGULATION_OF_PROTEIN_SECRETION		100	0.397232	1.23735	0.139059	0.332907	1	2929	tags=29%, list=17%, signal=35%
GO_PIGMENT_GRANULE_LOCALIZATION	GO_PIGMENT_GRANULE_LOCALIZATION		22	0.434631	1.23738	0.171815	0.333141	1	3922	tags=32%, list=23%, signal=41%
GO_FATTY_ACID_CATABOLIC_PROCESS	GO_FATTY_ACID_CATABOLIC_PROCESS		71	0.363541	1.23753	0.189243	0.333175	1	3891	tags=34%, list=23%, signal=44%
GO_POSITIVE_REGULATION_OF_LYMPHOCYTE_APOPTOTIC_PROCESS	GO_POSITIVE_REGULATION_OF_LYMPHOCYTE_APOPTOTIC_PROCESS		19	0.562704	1.23758	0.186538	0.333366	1	2707	tags=42%, list=16%, signal=50%
GO_RESPONSE_TO_IONIZING_RADIATION	GO_RESPONSE_TO_IONIZING_RADIATION		133	0.398402	1.23547	0.135849	0.334306	1	2778	tags=25%, list=16%, signal=29%
GO_NEGATIVE_REGULATION_OF_COAGULATION	GO_NEGATIVE_REGULATION_OF_COAGULATION		48	0.687607	1.66324	0	0.334646	0.972	1153	tags=27%, list=7%, signal=29%
GO_TRANSMEMBRANE_RECEPTOR_PROTEIN_TYROSINE_KINASE_SIGNALING_PATHWAY	GO_TRANSMEMBRANE_RECEPTOR_PROTEIN_TYROSINE_KINASE_SIGNALING_PATHWAY		472	0.323964	1.2349	0.0821355	0.334955	1	3244	tags=28%, list=19%, signal=34%
GO_POSITIVE_REGULATION_OF_VASCULAR_ENDOTHELIAL_GROWTH_FACTOR_RECEPTOR_SIGNALING_PATHWAY	GO_POSITIVE_REGULATION_OF_VASCULAR_ENDOTHELIAL_GROWTH_FACTOR_RECEPTOR_SIGNALING_PATHWAY		15	0.557402	1.2344	0.170385	0.335182	1	1340	tags=40%, list=8%, signal=43%
GO_RESPONSE_TO_GONADOTROPIN	GO_RESPONSE_TO_GONADOTROPIN		26	0.507875	1.23451	0.158915	0.335269	1	3028	tags=31%, list=18%, signal=37%
GO_POSITIVE_REGULATION_OF_LIPID_BIOSYNTHETIC_PROCESS	GO_POSITIVE_REGULATION_OF_LIPID_BIOSYNTHETIC_PROCESS		60	0.437839	1.23398	0.183299	0.335586	1	2305	tags=25%, list=13%, signal=29%
GO_GTP_METABOLIC_PROCESS	GO_GTP_METABOLIC_PROCESS		19	0.453841	1.23379	0.217391	0.335636	1	4776	tags=53%, list=28%, signal=73%
GO_OSSIFICATION	GO_OSSIFICATION		232	0.400283	1.23308	0.130178	0.336491	1	2451	tags=28%, list=14%, signal=32%
GO_PHOSPHOLIPID_BIOSYNTHETIC_PROCESS	GO_PHOSPHOLIPID_BIOSYNTHETIC_PROCESS		215	0.291844	1.23288	0.108108	0.336511	1	3779	tags=25%, list=22%, signal=32%
GO_SMOOTH_MUSCLE_CELL_DIFFERENTIATION	GO_SMOOTH_MUSCLE_CELL_DIFFERENTIATION		27	0.511835	1.2324	0.195358	0.336794	1	576	tags=15%, list=3%, signal=15%
GO_NEGATIVE_REGULATION_OF_REGULATED_SECRETORY_PATHWAY	GO_NEGATIVE_REGULATION_OF_REGULATED_SECRETORY_PATHWAY		20	0.512926	1.23254	0.193676	0.336837	1	2332	tags=35%, list=14%, signal=40%
GO_ERAD_PATHWAY	GO_ERAD_PATHWAY		67	0.320012	1.2318	0.181263	0.336998	1	4828	tags=42%, list=28%, signal=58%
GO_T_CELL_HOMEOSTASIS	GO_T_CELL_HOMEOSTASIS		33	0.454912	1.23135	0.218935	0.337152	1	3905	tags=42%, list=23%, signal=55%
GO_NEGATIVE_REGULATION_OF_NF_KAPPAB_TRANSCRIPTION_FACTOR_ACTIVITY	GO_NEGATIVE_REGULATION_OF_NF_KAPPAB_TRANSCRIPTION_FACTOR_ACTIVITY		59	0.36416	1.23183	0.1881	0.337219	1	4309	tags=36%, list=25%, signal=47%
GO_REGULATION_OF_CHEMOKINE_PRODUCTION	GO_REGULATION_OF_CHEMOKINE_PRODUCTION		61	0.686501	1.65332	0.0019305	0.337235	0.982	2087	tags=38%, list=12%, signal=43%
GO_REGULATION_OF_VASODILATION	GO_REGULATION_OF_VASODILATION		46	0.433959	1.23191	0.166348	0.33734	1	2202	tags=24%, list=13%, signal=27%
GO_INTRACELLULAR_RECEPTOR_SIGNALING_PATHWAY	GO_INTRACELLULAR_RECEPTOR_SIGNALING_PATHWAY		153	0.306744	1.23139	0.147002	0.337369	1	3626	tags=26%, list=21%, signal=33%
GO_POSITIVE_REGULATION_OF_MULTICELLULAR_ORGANISMAL_METABOLIC_PROCESS	GO_POSITIVE_REGULATION_OF_MULTICELLULAR_ORGANISMAL_METABOLIC_PROCESS		19	0.482755	1.2299	0.214567	0.339237	1	821	tags=16%, list=5%, signal=17%
GO_SMALL_MOLECULE_CATABOLIC_PROCESS	GO_SMALL_MOLECULE_CATABOLIC_PROCESS		306	0.334107	1.22948	0.166333	0.339623	1	3122	tags=25%, list=18%, signal=31%
GO_CELL_AGING	GO_CELL_AGING		63	0.420423	1.22897	0.201183	0.339896	1	3961	tags=38%, list=23%, signal=49%
GO_REGULATION_OF_ORGANELLE_ASSEMBLY	GO_REGULATION_OF_ORGANELLE_ASSEMBLY		140	0.299019	1.22903	0.122873	0.340055	1	4970	tags=40%, list=29%, signal=56%
GO_THYMOCYTE_AGGREGATION	GO_THYMOCYTE_AGGREGATION		45	0.607991	1.65623	0.00574713	0.340389	0.979	2154	tags=27%, list=13%, signal=30%
GO_PEPTIDE_CROSS_LINKING	GO_PEPTIDE_CROSS_LINKING		37	0.69823	1.65428	0.00381679	0.340539	0.982	1838	tags=27%, list=11%, signal=30%
GO_REGULATION_OF_MACROPHAGE_ACTIVATION	GO_REGULATION_OF_MACROPHAGE_ACTIVATION		24	0.671811	1.66347	0.00601202	0.340883	0.972	2037	tags=29%, list=12%, signal=33%
GO_BONE_GROWTH	GO_BONE_GROWTH		19	0.529795	1.22783	0.196787	0.341568	1	3624	tags=42%, list=21%, signal=53%
GO_SEMAPHORIN_PLEXIN_SIGNALING_PATHWAY	GO_SEMAPHORIN_PLEXIN_SIGNALING_PATHWAY		36	0.471248	1.22716	0.193159	0.341789	1	3367	tags=36%, list=20%, signal=45%
GO_GLOMERULAR_EPITHELIUM_DEVELOPMENT	GO_GLOMERULAR_EPITHELIUM_DEVELOPMENT		18	0.545374	1.22731	0.182178	0.341837	1	2383	tags=39%, list=14%, signal=45%
GO_HEAD_MORPHOGENESIS	GO_HEAD_MORPHOGENESIS		33	0.473204	1.22734	0.182711	0.342046	1	2428	tags=39%, list=14%, signal=46%
GO_PYRIMIDINE_NUCLEOTIDE_METABOLIC_PROCESS	GO_PYRIMIDINE_NUCLEOTIDE_METABOLIC_PROCESS		40	0.374736	1.22609	0.185547	0.343201	1	3134	tags=23%, list=18%, signal=27%
GO_HYDROGEN_PEROXIDE_CATABOLIC_PROCESS	GO_HYDROGEN_PEROXIDE_CATABOLIC_PROCESS		17	0.484395	1.22564	0.236111	0.343365	1	3512	tags=29%, list=20%, signal=37%
GO_AROMATIC_AMINO_ACID_FAMILY_METABOLIC_PROCESS	GO_AROMATIC_AMINO_ACID_FAMILY_METABOLIC_PROCESS		23	0.494173	1.22575	0.174699	0.343464	1	1963	tags=35%, list=11%, signal=39%
GO_MODULATION_BY_VIRUS_OF_HOST_MORPHOLOGY_OR_PHYSIOLOGY	GO_MODULATION_BY_VIRUS_OF_HOST_MORPHOLOGY_OR_PHYSIOLOGY		34	0.372361	1.22522	0.202783	0.343761	1	3026	tags=32%, list=18%, signal=39%
GO_AMMONIUM_TRANSPORT	GO_AMMONIUM_TRANSPORT		55	0.396498	1.22479	0.157058	0.343922	1	2660	tags=20%, list=15%, signal=24%
GO_INNATE_IMMUNE_RESPONSE_ACTIVATING_CELL_SURFACE_RECEPTOR_SIGNALING_PATHWAY	GO_INNATE_IMMUNE_RESPONSE_ACTIVATING_CELL_SURFACE_RECEPTOR_SIGNALING_PATHWAY		99	0.344511	1.22491	0.246548	0.344011	1	2615	tags=24%, list=15%, signal=28%
GO_NUCLEOTIDE_SUGAR_METABOLIC_PROCESS	GO_NUCLEOTIDE_SUGAR_METABOLIC_PROCESS		33	0.576752	1.66437	0.00994036	0.34466	0.971	3001	tags=33%, list=17%, signal=40%
GO_NEGATIVE_REGULATION_OF_INNATE_IMMUNE_RESPONSE	GO_NEGATIVE_REGULATION_OF_INNATE_IMMUNE_RESPONSE		34	0.698289	1.65672	0.0116505	0.34489	0.978	2905	tags=62%, list=17%, signal=74%
GO_REGULATION_OF_NUCLEOCYTOPLASMIC_TRANSPORT	GO_REGULATION_OF_NUCLEOCYTOPLASMIC_TRANSPORT		207	0.356331	1.22391	0.119433	0.345053	1	3053	tags=28%, list=18%, signal=33%
GO_REGULATION_OF_OXIDATIVE_STRESS_INDUCED_CELL_DEATH	GO_REGULATION_OF_OXIDATIVE_STRESS_INDUCED_CELL_DEATH		40	0.402554	1.22214	0.159046	0.346059	1	3201	tags=33%, list=19%, signal=40%
GO_REGULATION_OF_INTRINSIC_APOPTOTIC_SIGNALING_PATHWAY_BY_P53_CLASS_MEDIATOR	GO_REGULATION_OF_INTRINSIC_APOPTOTIC_SIGNALING_PATHWAY_BY_P53_CLASS_MEDIATOR		21	0.443999	1.22311	0.222656	0.346151	1	2173	tags=29%, list=13%, signal=33%
GO_NEGATIVE_REGULATION_OF_RESPONSE_TO_EXTRACELLULAR_STIMULUS	GO_NEGATIVE_REGULATION_OF_RESPONSE_TO_EXTRACELLULAR_STIMULUS		32	0.394274	1.22191	0.204453	0.346177	1	4741	tags=47%, list=28%, signal=65%
GO_REGULATION_OF_KIDNEY_DEVELOPMENT	GO_REGULATION_OF_KIDNEY_DEVELOPMENT		53	0.454834	1.22131	0.152642	0.346302	1	1810	tags=28%, list=11%, signal=32%
GO_APOPTOTIC_MITOCHONDRIAL_CHANGES	GO_APOPTOTIC_MITOCHONDRIAL_CHANGES		54	0.411216	1.22215	0.17126	0.346319	1	2782	tags=28%, list=16%, signal=33%
GO_NEGATIVE_REGULATION_OF_INTRINSIC_APOPTOTIC_SIGNALING_PATHWAY_BY_P53_CLASS_MEDIATOR	GO_NEGATIVE_REGULATION_OF_INTRINSIC_APOPTOTIC_SIGNALING_PATHWAY_BY_P53_CLASS_MEDIATOR		17	0.46762	1.22141	0.203922	0.346408	1	1570	tags=29%, list=9%, signal=32%
GO_MYELOID_DENDRITIC_CELL_DIFFERENTIATION	GO_MYELOID_DENDRITIC_CELL_DIFFERENTIATION		19	0.535675	1.22225	0.251546	0.346421	1	2057	tags=42%, list=12%, signal=48%
GO_CELLULAR_HORMONE_METABOLIC_PROCESS	GO_CELLULAR_HORMONE_METABOLIC_PROCESS		90	0.403989	1.2224	0.164659	0.346454	1	2177	tags=22%, list=13%, signal=25%
GO_REGULATION_OF_ANOIKIS	GO_REGULATION_OF_ANOIKIS		23	0.455455	1.22101	0.182	0.346521	1	2575	tags=30%, list=15%, signal=36%
GO_RAS_PROTEIN_SIGNAL_TRANSDUCTION	GO_RAS_PROTEIN_SIGNAL_TRANSDUCTION		138	0.335585	1.22151	0.121457	0.346528	1	3868	tags=36%, list=22%, signal=46%
GO_IMMUNE_RESPONSE_REGULATING_CELL_SURFACE_RECEPTOR_SIGNALING_PATHWAY	GO_IMMUNE_RESPONSE_REGULATING_CELL_SURFACE_RECEPTOR_SIGNALING_PATHWAY		281	0.359514	1.22265	0.219885	0.34661	1	3142	tags=27%, list=18%, signal=32%
GO_REACTIVE_NITROGEN_SPECIES_METABOLIC_PROCESS	GO_REACTIVE_NITROGEN_SPECIES_METABOLIC_PROCESS		17	0.545048	1.22245	0.19137	0.34666	1	3992	tags=47%, list=23%, signal=61%
GO_REGULATION_OF_CATECHOLAMINE_METABOLIC_PROCESS	GO_REGULATION_OF_CATECHOLAMINE_METABOLIC_PROCESS		16	0.540616	1.22011	0.223529	0.34762	1	123	tags=13%, list=1%, signal=13%
GO_POSITIVE_REGULATION_OF_MITOCHONDRION_ORGANIZATION	GO_POSITIVE_REGULATION_OF_MITOCHONDRION_ORGANIZATION		142	0.305452	1.21942	0.135029	0.348455	1	3479	tags=26%, list=20%, signal=32%
GO_NEGATIVE_REGULATION_OF_CANONICAL_WNT_SIGNALING_PATHWAY	GO_NEGATIVE_REGULATION_OF_CANONICAL_WNT_SIGNALING_PATHWAY		153	0.362122	1.2182	0.127953	0.348531	1	2697	tags=26%, list=16%, signal=31%
GO_POSITIVE_REGULATION_OF_CYTOSKELETON_ORGANIZATION	GO_POSITIVE_REGULATION_OF_CYTOSKELETON_ORGANIZATION		160	0.337006	1.21913	0.143689	0.348633	1	3484	tags=30%, list=20%, signal=37%
GO_INTERFERON_GAMMA_PRODUCTION	GO_INTERFERON_GAMMA_PRODUCTION		15	0.568136	1.21878	0.25144	0.348633	1	4194	tags=40%, list=24%, signal=53%
GO_CELLULAR_RESPONSE_TO_IONIZING_RADIATION	GO_CELLULAR_RESPONSE_TO_IONIZING_RADIATION		48	0.443039	1.21889	0.173664	0.348732	1	2516	tags=33%, list=15%, signal=39%
GO_BONE_DEVELOPMENT	GO_BONE_DEVELOPMENT		143	0.387233	1.21822	0.147002	0.348775	1	3499	tags=34%, list=20%, signal=43%
GO_REGULATION_OF_MUSCLE_SYSTEM_PROCESS	GO_REGULATION_OF_MUSCLE_SYSTEM_PROCESS		187	0.352688	1.21854	0.12963	0.348784	1	2205	tags=20%, list=13%, signal=23%
GO_INTRINSIC_APOPTOTIC_SIGNALING_PATHWAY_BY_P53_CLASS_MEDIATOR	GO_INTRINSIC_APOPTOTIC_SIGNALING_PATHWAY_BY_P53_CLASS_MEDIATOR		52	0.386474	1.21832	0.171315	0.348864	1	2529	tags=23%, list=15%, signal=27%
GO_CELLULAR_RESPONSE_TO_CALCIUM_ION	GO_CELLULAR_RESPONSE_TO_CALCIUM_ION		43	0.475321	1.21769	0.193613	0.349041	1	2123	tags=30%, list=12%, signal=34%
GO_PHOSPHOLIPID_METABOLIC_PROCESS	GO_PHOSPHOLIPID_METABOLIC_PROCESS		321	0.291297	1.2174	0.127953	0.349207	1	4069	tags=28%, list=24%, signal=36%
GO_GLYCEROLIPID_METABOLIC_PROCESS	GO_GLYCEROLIPID_METABOLIC_PROCESS		321	0.297769	1.21684	0.118474	0.349324	1	3129	tags=21%, list=18%, signal=25%
GO_NEGATIVE_REGULATION_OF_MYELOID_CELL_DIFFERENTIATION	GO_NEGATIVE_REGULATION_OF_MYELOID_CELL_DIFFERENTIATION		68	0.427489	1.21667	0.179584	0.349333	1	2885	tags=32%, list=17%, signal=39%
GO_VERY_LONG_CHAIN_FATTY_ACID_METABOLIC_PROCESS	GO_VERY_LONG_CHAIN_FATTY_ACID_METABOLIC_PROCESS		22	0.51322	1.21693	0.242798	0.349461	1	3781	tags=50%, list=22%, signal=64%
GO_CELLULAR_RESPONSE_TO_RADIATION	GO_CELLULAR_RESPONSE_TO_RADIATION		126	0.374745	1.21706	0.171815	0.349527	1	3087	tags=26%, list=18%, signal=32%
GO_GLYCEROPHOSPHOLIPID_METABOLIC_PROCESS	GO_GLYCEROPHOSPHOLIPID_METABOLIC_PROCESS		268	0.299541	1.21501	0.134538	0.350039	1	4053	tags=28%, list=24%, signal=37%
GO_GROWTH	GO_GROWTH		376	0.341354	1.21566	0.0717213	0.350063	1	2768	tags=24%, list=16%, signal=28%
GO_REGULATION_OF_INTRACELLULAR_PROTEIN_TRANSPORT	GO_REGULATION_OF_INTRACELLULAR_PROTEIN_TRANSPORT		336	0.31794	1.21548	0.111332	0.350083	1	3053	tags=25%, list=18%, signal=30%
GO_CELL_SUBSTRATE_ADHERENS_JUNCTION_ASSEMBLY	GO_CELL_SUBSTRATE_ADHERENS_JUNCTION_ASSEMBLY		23	0.469088	1.21601	0.235294	0.350098	1	4187	tags=48%, list=24%, signal=63%
GO_NITRIC_OXIDE_METABOLIC_PROCESS	GO_NITRIC_OXIDE_METABOLIC_PROCESS		15	0.570003	1.21527	0.202226	0.350167	1	3992	tags=53%, list=23%, signal=69%
GO_RESPONSE_TO_CADMIUM_ION	GO_RESPONSE_TO_CADMIUM_ION		37	0.445628	1.21569	0.211462	0.350299	1	3372	tags=35%, list=20%, signal=44%
GO_REGULATION_OF_DIGESTIVE_SYSTEM_PROCESS	GO_REGULATION_OF_DIGESTIVE_SYSTEM_PROCESS		35	0.410437	1.21502	0.178499	0.3503	1	243	tags=9%, list=1%, signal=9%
GO_REGULATION_OF_ENDOTHELIAL_CELL_PROLIFERATION	GO_REGULATION_OF_ENDOTHELIAL_CELL_PROLIFERATION		92	0.427305	1.21303	0.164729	0.351552	1	1810	tags=25%, list=11%, signal=28%
GO_POSITIVE_REGULATION_OF_STEROL_TRANSPORT	GO_POSITIVE_REGULATION_OF_STEROL_TRANSPORT		17	0.516131	1.21283	0.221757	0.351591	1	2616	tags=41%, list=15%, signal=49%
GO_THIOESTER_METABOLIC_PROCESS	GO_THIOESTER_METABOLIC_PROCESS		71	0.370388	1.21335	0.19833	0.351611	1	3058	tags=27%, list=18%, signal=32%
GO_COPPER_ION_HOMEOSTASIS	GO_COPPER_ION_HOMEOSTASIS		16	0.420669	1.21349	0.251509	0.351663	1	3341	tags=38%, list=19%, signal=46%
GO_REGULATION_OF_MUSCLE_CONTRACTION	GO_REGULATION_OF_MUSCLE_CONTRACTION		140	0.361534	1.21308	0.155556	0.351745	1	2547	tags=22%, list=15%, signal=26%
GO_RESPONSE_TO_GROWTH_FACTOR	GO_RESPONSE_TO_GROWTH_FACTOR		450	0.343183	1.2136	0.10397	0.351751	1	2392	tags=22%, list=14%, signal=25%
GO_REGULATION_OF_PRODUCTION_OF_MOLECULAR_MEDIATOR_OF_IMMUNE_RESPONSE	GO_REGULATION_OF_PRODUCTION_OF_MOLECULAR_MEDIATOR_OF_IMMUNE_RESPONSE		95	0.613371	1.66448	0	0.351759	0.971	3041	tags=39%, list=18%, signal=47%
GO_NEGATIVE_REGULATION_OF_TRANSFERASE_ACTIVITY	GO_NEGATIVE_REGULATION_OF_TRANSFERASE_ACTIVITY		318	0.323867	1.21375	0.135135	0.351812	1	2996	tags=26%, list=17%, signal=31%
GO_REGULATION_OF_ORGAN_MORPHOGENESIS	GO_REGULATION_OF_ORGAN_MORPHOGENESIS		236	0.356023	1.21186	0.143713	0.352635	1	3569	tags=31%, list=21%, signal=39%
GO_NUCLEOSIDE_MONOPHOSPHATE_BIOSYNTHETIC_PROCESS	GO_NUCLEOSIDE_MONOPHOSPHATE_BIOSYNTHETIC_PROCESS		55	0.389895	1.21189	0.199211	0.352865	1	3064	tags=24%, list=18%, signal=29%
GO_ANTIGEN_RECEPTOR_MEDIATED_SIGNALING_PATHWAY	GO_ANTIGEN_RECEPTOR_MEDIATED_SIGNALING_PATHWAY		169	0.376157	1.21065	0.249035	0.354393	1	2615	tags=23%, list=15%, signal=27%
GO_MUSCLE_TISSUE_DEVELOPMENT	GO_MUSCLE_TISSUE_DEVELOPMENT		254	0.347954	1.21009	0.114851	0.35499	1	1931	tags=19%, list=11%, signal=21%
GO_MATURE_B_CELL_DIFFERENTIATION	GO_MATURE_B_CELL_DIFFERENTIATION		17	0.535052	1.20987	0.236581	0.355063	1	3112	tags=53%, list=18%, signal=65%
GO_NEGATIVE_REGULATION_OF_MAPK_CASCADE	GO_NEGATIVE_REGULATION_OF_MAPK_CASCADE		140	0.373784	1.20965	0.152642	0.355156	1	3753	tags=37%, list=22%, signal=47%
GO_LIPID_HOMEOSTASIS	GO_LIPID_HOMEOSTASIS		103	0.334843	1.20905	0.14959	0.355809	1	3122	tags=24%, list=18%, signal=29%
GO_REGULATION_OF_EPITHELIAL_CELL_PROLIFERATION	GO_REGULATION_OF_EPITHELIAL_CELL_PROLIFERATION		269	0.378602	1.20839	0.115312	0.35632	1	1810	tags=20%, list=11%, signal=22%
GO_REGULATION_OF_INTERLEUKIN_1_SECRETION	GO_REGULATION_OF_INTERLEUKIN_1_SECRETION		28	0.504766	1.20854	0.262956	0.356336	1	2923	tags=39%, list=17%, signal=47%
GO_ENDOCHONDRAL_BONE_MORPHOGENESIS	GO_ENDOCHONDRAL_BONE_MORPHOGENESIS		44	0.446418	1.20797	0.20198	0.356767	1	3499	tags=36%, list=20%, signal=46%
GO_SPERM_MOTILITY	GO_SPERM_MOTILITY		38	0.350673	1.20749	0.271536	0.357304	1	4634	tags=32%, list=27%, signal=43%
GO_HEXOSE_METABOLIC_PROCESS	GO_HEXOSE_METABOLIC_PROCESS		146	0.479002	1.66507	0.00414079	0.357626	0.971	3059	tags=29%, list=18%, signal=35%
GO_DEVELOPMENTAL_PIGMENTATION	GO_DEVELOPMENTAL_PIGMENTATION		35	0.439577	1.20692	0.182731	0.358001	1	2199	tags=26%, list=13%, signal=29%
GO_ACTIN_FILAMENT_BUNDLE_ORGANIZATION	GO_ACTIN_FILAMENT_BUNDLE_ORGANIZATION		44	0.402663	1.20675	0.184158	0.35802	1	1528	tags=23%, list=9%, signal=25%
GO_REGULATION_OF_CYTOKINE_BIOSYNTHETIC_PROCESS	GO_REGULATION_OF_CYTOKINE_BIOSYNTHETIC_PROCESS		93	0.648846	1.67164	0.00190476	0.358422	0.966	2816	tags=43%, list=16%, signal=51%
GO_CELLULAR_AMINO_ACID_METABOLIC_PROCESS	GO_CELLULAR_AMINO_ACID_METABOLIC_PROCESS		278	0.310101	1.20478	0.129159	0.360659	1	2965	tags=23%, list=17%, signal=27%
GO_RESPONSE_TO_IRON_ION	GO_RESPONSE_TO_IRON_ION		35	0.44579	1.20494	0.170254	0.360684	1	1873	tags=26%, list=11%, signal=29%
GO_STEROID_BIOSYNTHETIC_PROCESS	GO_STEROID_BIOSYNTHETIC_PROCESS		106	0.330549	1.2037	0.168337	0.360718	1	1827	tags=14%, list=11%, signal=16%
GO_MODULATION_BY_SYMBIONT_OF_HOST_CELLULAR_PROCESS	GO_MODULATION_BY_SYMBIONT_OF_HOST_CELLULAR_PROCESS		25	0.403035	1.20455	0.206478	0.360758	1	3244	tags=40%, list=19%, signal=49%
GO_STEROID_METABOLIC_PROCESS	GO_STEROID_METABOLIC_PROCESS		219	0.318813	1.20375	0.150602	0.360913	1	2740	tags=19%, list=16%, signal=23%
GO_CELLULAR_RESPONSE_TO_ORGANIC_CYCLIC_COMPOUND	GO_CELLULAR_RESPONSE_TO_ORGANIC_CYCLIC_COMPOUND		431	0.332663	1.20422	0.0910891	0.360989	1	3084	tags=26%, list=18%, signal=31%
GO_RESPONSE_TO_ZINC_ION	GO_RESPONSE_TO_ZINC_ION		51	0.434629	1.20386	0.171484	0.360993	1	2624	tags=33%, list=15%, signal=39%
GO_ALPHA_AMINO_ACID_METABOLIC_PROCESS	GO_ALPHA_AMINO_ACID_METABOLIC_PROCESS		199	0.332906	1.20404	0.135081	0.360994	1	2965	tags=25%, list=17%, signal=30%
GO_GLOMERULUS_DEVELOPMENT	GO_GLOMERULUS_DEVELOPMENT		47	0.508111	1.20224	0.228797	0.362832	1	2383	tags=38%, list=14%, signal=44%
GO_RESPONSE_TO_LIPOPROTEIN_PARTICLE	GO_RESPONSE_TO_LIPOPROTEIN_PARTICLE		19	0.598418	1.20201	0.274319	0.362921	1	2192	tags=47%, list=13%, signal=54%
GO_T_CELL_LINEAGE_COMMITMENT	GO_T_CELL_LINEAGE_COMMITMENT		15	0.696942	1.6724	0.00790514	0.364157	0.966	2846	tags=27%, list=17%, signal=32%
GO_INACTIVATION_OF_MAPK_ACTIVITY	GO_INACTIVATION_OF_MAPK_ACTIVITY		26	0.492368	1.20078	0.261811	0.364387	1	3366	tags=46%, list=20%, signal=57%
GO_RESPONSE_TO_CORTICOSTERONE	GO_RESPONSE_TO_CORTICOSTERONE		25	0.515971	1.20086	0.207767	0.364549	1	2893	tags=40%, list=17%, signal=48%
GO_REGULATION_OF_HOMEOSTATIC_PROCESS	GO_REGULATION_OF_HOMEOSTATIC_PROCESS		416	0.314824	1.20012	0.100791	0.364939	1	2204	tags=19%, list=13%, signal=21%
GO_POSITIVE_REGULATION_OF_INTERLEUKIN_1_PRODUCTION	GO_POSITIVE_REGULATION_OF_INTERLEUKIN_1_PRODUCTION		32	0.502776	1.19943	0.27151	0.364992	1	2923	tags=38%, list=17%, signal=45%
GO_PEPTIDYL_GLUTAMIC_ACID_MODIFICATION	GO_PEPTIDYL_GLUTAMIC_ACID_MODIFICATION		27	0.403911	1.20022	0.224371	0.365033	1	2396	tags=22%, list=14%, signal=26%
GO_PYRIMIDINE_NUCLEOSIDE_METABOLIC_PROCESS	GO_PYRIMIDINE_NUCLEOSIDE_METABOLIC_PROCESS		43	0.609696	1.66526	0.00773694	0.365148	0.971	2080	tags=23%, list=12%, signal=26%
GO_HORMONE_METABOLIC_PROCESS	GO_HORMONE_METABOLIC_PROCESS		146	0.366287	1.19912	0.157576	0.365247	1	2179	tags=18%, list=13%, signal=21%
GO_POSITIVE_REGULATION_OF_INTERLEUKIN_12_PRODUCTION	GO_POSITIVE_REGULATION_OF_INTERLEUKIN_12_PRODUCTION		32	0.486877	1.19945	0.240234	0.365255	1	2824	tags=28%, list=16%, signal=34%
GO_PIGMENT_METABOLIC_PROCESS	GO_PIGMENT_METABOLIC_PROCESS		54	0.347489	1.19972	0.172764	0.365309	1	3977	tags=31%, list=23%, signal=41%
GO_RESPONSE_TO_FATTY_ACID	GO_RESPONSE_TO_FATTY_ACID		81	0.384003	1.19857	0.151874	0.365311	1	2202	tags=23%, list=13%, signal=27%
GO_NEGATIVE_REGULATION_OF_SEQUENCE_SPECIFIC_DNA_BINDING_TRANSCRIPTION_FACTOR_ACTIVITY	GO_NEGATIVE_REGULATION_OF_SEQUENCE_SPECIFIC_DNA_BINDING_TRANSCRIPTION_FACTOR_ACTIVITY		124	0.344515	1.19949	0.153101	0.365435	1	2499	tags=20%, list=15%, signal=23%
GO_GLYCEROLIPID_BIOSYNTHETIC_PROCESS	GO_GLYCEROLIPID_BIOSYNTHETIC_PROCESS		195	0.29341	1.19866	0.140496	0.365447	1	3779	tags=24%, list=22%, signal=30%
GO_MALE_GENITALIA_DEVELOPMENT	GO_MALE_GENITALIA_DEVELOPMENT		21	0.467889	1.19866	0.233871	0.36572	1	3028	tags=24%, list=18%, signal=29%
GO_NEGATIVE_REGULATION_OF_CALCIUM_ION_IMPORT	GO_NEGATIVE_REGULATION_OF_CALCIUM_ION_IMPORT		21	0.49778	1.1981	0.218324	0.365807	1	3372	tags=38%, list=20%, signal=47%
GO_GOLGI_VESICLE_TRANSPORT	GO_GOLGI_VESICLE_TRANSPORT		291	0.285474	1.19754	0.158763	0.366443	1	3443	tags=25%, list=20%, signal=31%
GO_POSITIVE_REGULATION_OF_FATTY_ACID_BIOSYNTHETIC_PROCESS	GO_POSITIVE_REGULATION_OF_FATTY_ACID_BIOSYNTHETIC_PROCESS		17	0.802253	1.66677	0.0040404	0.368075	0.969	675	tags=29%, list=4%, signal=31%
GO_POSITIVE_REGULATION_OF_BINDING	GO_POSITIVE_REGULATION_OF_BINDING		119	0.364346	1.19624	0.172084	0.36829	1	3084	tags=28%, list=18%, signal=34%
GO_NEGATIVE_REGULATION_OF_CELLULAR_PROTEIN_LOCALIZATION	GO_NEGATIVE_REGULATION_OF_CELLULAR_PROTEIN_LOCALIZATION		127	0.313891	1.1957	0.142857	0.368893	1	3536	tags=31%, list=21%, signal=39%
GO_REGULATION_OF_EMBRYONIC_DEVELOPMENT	GO_REGULATION_OF_EMBRYONIC_DEVELOPMENT		105	0.385104	1.19532	0.179435	0.369183	1	3530	tags=30%, list=21%, signal=38%
GO_NEGATIVE_REGULATION_OF_PHOSPHORYLATION	GO_NEGATIVE_REGULATION_OF_PHOSPHORYLATION		393	0.336284	1.19393	0.108738	0.369204	1	3281	tags=30%, list=19%, signal=37%
GO_POSITIVE_REGULATION_OF_CELLULAR_PROTEIN_LOCALIZATION	GO_POSITIVE_REGULATION_OF_CELLULAR_PROTEIN_LOCALIZATION		322	0.311237	1.19435	0.111554	0.369358	1	2564	tags=20%, list=15%, signal=23%
GO_POSITIVE_REGULATION_OF_STRESS_ACTIVATED_PROTEIN_KINASE_SIGNALING_CASCADE	GO_POSITIVE_REGULATION_OF_STRESS_ACTIVATED_PROTEIN_KINASE_SIGNALING_CASCADE		130	0.336728	1.19346	0.156788	0.369418	1	2342	tags=21%, list=14%, signal=24%
GO_PYRIMIDINE_CONTAINING_COMPOUND_BIOSYNTHETIC_PROCESS	GO_PYRIMIDINE_CONTAINING_COMPOUND_BIOSYNTHETIC_PROCESS		35	0.41069	1.19397	0.226488	0.369434	1	4048	tags=37%, list=24%, signal=48%
GO_PYRIMIDINE_NUCLEOBASE_METABOLIC_PROCESS	GO_PYRIMIDINE_NUCLEOBASE_METABOLIC_PROCESS		19	0.452541	1.19478	0.234286	0.369478	1	4048	tags=37%, list=24%, signal=48%
GO_RESPONSE_TO_LITHIUM_ION	GO_RESPONSE_TO_LITHIUM_ION		27	0.486879	1.19493	0.181818	0.369514	1	835	tags=19%, list=5%, signal=19%
GO_RIBONUCLEOSIDE_CATABOLIC_PROCESS	GO_RIBONUCLEOSIDE_CATABOLIC_PROCESS		22	0.49306	1.19286	0.246602	0.369582	1	1730	tags=27%, list=10%, signal=30%
GO_REGULATION_OF_STEROID_METABOLIC_PROCESS	GO_REGULATION_OF_STEROID_METABOLIC_PROCESS		72	0.369533	1.19438	0.169014	0.369589	1	3039	tags=35%, list=18%, signal=42%
GO_REGULATION_OF_CELL_FATE_COMMITMENT	GO_REGULATION_OF_CELL_FATE_COMMITMENT		23	0.470842	1.19401	0.229572	0.369636	1	3293	tags=30%, list=19%, signal=38%
GO_POSITIVE_REGULATION_OF_INTRACELLULAR_PROTEIN_TRANSPORT	GO_POSITIVE_REGULATION_OF_INTRACELLULAR_PROTEIN_TRANSPORT		222	0.327263	1.19349	0.137652	0.369653	1	3053	tags=25%, list=18%, signal=30%
GO_NEGATIVE_REGULATION_OF_TRANSMEMBRANE_RECEPTOR_PROTEIN_SERINE_THREONINE_KINASE_SIGNALING_PATHWAY	GO_NEGATIVE_REGULATION_OF_TRANSMEMBRANE_RECEPTOR_PROTEIN_SERINE_THREONINE_KINASE_SIGNALING_PATHWAY		91	0.400602	1.19447	0.177551	0.369725	1	2402	tags=24%, list=14%, signal=28%
GO_MONOCARBOXYLIC_ACID_TRANSPORT	GO_MONOCARBOXYLIC_ACID_TRANSPORT		111	0.378968	1.19256	0.177551	0.369795	1	2267	tags=23%, list=13%, signal=27%
GO_POSITIVE_REGULATION_OF_CELLULAR_RESPONSE_TO_TRANSFORMING_GROWTH_FACTOR_BETA_STIMULUS	GO_POSITIVE_REGULATION_OF_CELLULAR_RESPONSE_TO_TRANSFORMING_GROWTH_FACTOR_BETA_STIMULUS		23	0.490251	1.19288	0.244576	0.369834	1	2235	tags=26%, list=13%, signal=30%
GO_RESPONSE_TO_CALCIUM_ION	GO_RESPONSE_TO_CALCIUM_ION		107	0.381439	1.19235	0.152	0.369906	1	1843	tags=21%, list=11%, signal=24%
GO_MAST_CELL_ACTIVATION	GO_MAST_CELL_ACTIVATION		21	0.549105	1.19296	0.228037	0.369963	1	1557	tags=38%, list=9%, signal=42%
GO_BODY_MORPHOGENESIS	GO_BODY_MORPHOGENESIS		41	0.429432	1.19175	0.201172	0.370635	1	2428	tags=34%, list=14%, signal=40%
GO_NEGATIVE_REGULATION_OF_CYTOKINE_PRODUCTION	GO_NEGATIVE_REGULATION_OF_CYTOKINE_PRODUCTION		187	0.590332	1.67304	0.00380228	0.370743	0.965	3311	tags=40%, list=19%, signal=48%
GO_NEGATIVE_REGULATION_OF_BLOOD_VESSEL_ENDOTHELIAL_CELL_MIGRATION	GO_NEGATIVE_REGULATION_OF_BLOOD_VESSEL_ENDOTHELIAL_CELL_MIGRATION		23	0.457121	1.19121	0.266667	0.371274	1	1457	tags=17%, list=8%, signal=19%
GO_AORTA_DEVELOPMENT	GO_AORTA_DEVELOPMENT		41	0.444457	1.19082	0.200409	0.371638	1	1643	tags=24%, list=10%, signal=27%
GO_LYSOSOME_LOCALIZATION	GO_LYSOSOME_LOCALIZATION		23	0.4711	1.1889	0.21673	0.374489	1	1025	tags=22%, list=6%, signal=23%
GO_PURINE_CONTAINING_COMPOUND_BIOSYNTHETIC_PROCESS	GO_PURINE_CONTAINING_COMPOUND_BIOSYNTHETIC_PROCESS		105	0.330845	1.18819	0.14425	0.374534	1	3032	tags=22%, list=18%, signal=26%
GO_NEGATIVE_REGULATION_OF_EXOCYTOSIS	GO_NEGATIVE_REGULATION_OF_EXOCYTOSIS		26	0.48503	1.18775	0.197211	0.374686	1	2332	tags=35%, list=14%, signal=40%
GO_CRANIAL_NERVE_MORPHOGENESIS	GO_CRANIAL_NERVE_MORPHOGENESIS		22	0.52922	1.18825	0.24031	0.374718	1	2174	tags=36%, list=13%, signal=42%
GO_MYOBLAST_DIFFERENTIATION	GO_MYOBLAST_DIFFERENTIATION		35	0.382347	1.18854	0.185111	0.374804	1	3301	tags=31%, list=19%, signal=39%
GO_MAMMARY_GLAND_LOBULE_DEVELOPMENT	GO_MAMMARY_GLAND_LOBULE_DEVELOPMENT		15	0.531226	1.18784	0.241036	0.374854	1	1554	tags=27%, list=9%, signal=29%
GO_NEGATIVE_REGULATION_OF_MUSCLE_CONTRACTION	GO_NEGATIVE_REGULATION_OF_MUSCLE_CONTRACTION		20	0.484418	1.1883	0.214971	0.374919	1	3479	tags=40%, list=20%, signal=50%
GO_FEMALE_GAMETE_GENERATION	GO_FEMALE_GAMETE_GENERATION		85	0.344108	1.18743	0.194605	0.374933	1	2708	tags=19%, list=16%, signal=22%
GO_NUCLEOTIDE_BINDING_DOMAIN_LEUCINE_RICH_REPEAT_CONTAINING_RECEPTOR_SIGNALING_PATHWAY	GO_NUCLEOTIDE_BINDING_DOMAIN_LEUCINE_RICH_REPEAT_CONTAINING_RECEPTOR_SIGNALING_PATHWAY		24	0.424984	1.18692	0.314852	0.375515	1	2598	tags=25%, list=15%, signal=29%
GO_REGULATION_OF_CELL_MATRIX_ADHESION	GO_REGULATION_OF_CELL_MATRIX_ADHESION		83	0.409373	1.18667	0.193548	0.375633	1	3456	tags=34%, list=20%, signal=42%
GO_NEGATIVE_REGULATION_OF_ACTIN_FILAMENT_POLYMERIZATION	GO_NEGATIVE_REGULATION_OF_ACTIN_FILAMENT_POLYMERIZATION		42	0.397482	1.18637	0.243714	0.375836	1	3121	tags=33%, list=18%, signal=41%
GO_REGULATION_OF_ALCOHOL_BIOSYNTHETIC_PROCESS	GO_REGULATION_OF_ALCOHOL_BIOSYNTHETIC_PROCESS		44	0.427424	1.18618	0.172764	0.375887	1	3039	tags=39%, list=18%, signal=47%
GO_POSITIVE_REGULATION_OF_PHOSPHATASE_ACTIVITY	GO_POSITIVE_REGULATION_OF_PHOSPHATASE_ACTIVITY		26	0.447237	1.18581	0.212679	0.376269	1	860	tags=23%, list=5%, signal=24%
GO_REGULATION_OF_EPIDERMIS_DEVELOPMENT	GO_REGULATION_OF_EPIDERMIS_DEVELOPMENT		55	0.393876	1.18526	0.19305	0.376659	1	2358	tags=22%, list=14%, signal=25%
GO_MOLTING_CYCLE	GO_MOLTING_CYCLE		78	0.378554	1.18541	0.185111	0.376671	1	1874	tags=17%, list=11%, signal=19%
GO_SOMATIC_RECOMBINATION_OF_IMMUNOGLOBULIN_GENE_SEGMENTS	GO_SOMATIC_RECOMBINATION_OF_IMMUNOGLOBULIN_GENE_SEGMENTS		20	0.417962	1.18472	0.273408	0.377298	1	2846	tags=15%, list=17%, signal=18%
GO_ARTERY_DEVELOPMENT	GO_ARTERY_DEVELOPMENT		74	0.413391	1.18443	0.214286	0.377489	1	2189	tags=26%, list=13%, signal=29%
GO_NEPHRIC_DUCT_DEVELOPMENT	GO_NEPHRIC_DUCT_DEVELOPMENT		15	0.507206	1.18391	0.251451	0.377719	1	1643	tags=20%, list=10%, signal=22%
GO_POSITIVE_REGULATION_OF_CARBOHYDRATE_METABOLIC_PROCESS	GO_POSITIVE_REGULATION_OF_CARBOHYDRATE_METABOLIC_PROCESS		68	0.360291	1.18372	0.178641	0.377767	1	3798	tags=29%, list=22%, signal=38%
GO_LEUKOCYTE_DEGRANULATION	GO_LEUKOCYTE_DEGRANULATION		27	0.524697	1.184	0.250965	0.377869	1	3046	tags=48%, list=18%, signal=58%
GO_DIVALENT_INORGANIC_CATION_HOMEOSTASIS	GO_DIVALENT_INORGANIC_CATION_HOMEOSTASIS		324	0.348089	1.18274	0.151767	0.378786	1	2529	tags=21%, list=15%, signal=24%
GO_CELLULAR_RESPONSE_TO_CARBOHYDRATE_STIMULUS	GO_CELLULAR_RESPONSE_TO_CARBOHYDRATE_STIMULUS		71	0.398873	1.18222	0.198783	0.378867	1	1400	tags=24%, list=8%, signal=26%
GO_MUSCLE_CELL_MIGRATION	GO_MUSCLE_CELL_MIGRATION		16	0.560216	1.1825	0.246988	0.378931	1	103	tags=19%, list=1%, signal=19%
GO_RESPONSE_TO_ETHANOL	GO_RESPONSE_TO_ETHANOL		134	0.322127	1.1823	0.171843	0.379009	1	1873	tags=16%, list=11%, signal=18%
GO_GLYCOSYL_COMPOUND_BIOSYNTHETIC_PROCESS	GO_GLYCOSYL_COMPOUND_BIOSYNTHETIC_PROCESS		84	0.341432	1.18275	0.196154	0.379058	1	3064	tags=23%, list=18%, signal=27%
GO_ANATOMICAL_STRUCTURE_HOMEOSTASIS	GO_ANATOMICAL_STRUCTURE_HOMEOSTASIS		244	0.292974	1.18151	0.152805	0.379776	1	3674	tags=23%, list=21%, signal=29%
GO_REPRODUCTIVE_SYSTEM_DEVELOPMENT	GO_REPRODUCTIVE_SYSTEM_DEVELOPMENT		385	0.318753	1.18121	0.134766	0.380009	1	3352	tags=25%, list=19%, signal=31%
GO_NEGATIVE_REGULATION_OF_IMMUNE_RESPONSE	GO_NEGATIVE_REGULATION_OF_IMMUNE_RESPONSE		111	0.640523	1.67307	0.00189394	0.380076	0.965	2905	tags=45%, list=17%, signal=54%
GO_POSITIVE_REGULATION_OF_NEUROBLAST_PROLIFERATION	GO_POSITIVE_REGULATION_OF_NEUROBLAST_PROLIFERATION		21	0.515142	1.1798	0.192607	0.381873	1	2223	tags=29%, list=13%, signal=33%
GO_VIRAL_GENOME_REPLICATION	GO_VIRAL_GENOME_REPLICATION		19	0.374545	1.17993	0.236581	0.381917	1	129	tags=5%, list=1%, signal=5%
GO_FATTY_ACID_DERIVATIVE_TRANSPORT	GO_FATTY_ACID_DERIVATIVE_TRANSPORT		20	0.782433	1.67514	0.00188324	0.382513	0.964	1628	tags=35%, list=9%, signal=39%
GO_POSITIVE_REGULATION_OF_CALCIUM_ION_IMPORT	GO_POSITIVE_REGULATION_OF_CALCIUM_ION_IMPORT		46	0.40394	1.17881	0.251029	0.382668	1	818	tags=11%, list=5%, signal=11%
GO_POSITIVE_REGULATION_OF_PROTEIN_POLYMERIZATION	GO_POSITIVE_REGULATION_OF_PROTEIN_POLYMERIZATION		78	0.348688	1.17915	0.212644	0.382684	1	3484	tags=35%, list=20%, signal=43%
GO_NEGATIVE_REGULATION_OF_OXIDATIVE_STRESS_INDUCED_INTRINSIC_APOPTOTIC_SIGNALING_PATHWAY	GO_NEGATIVE_REGULATION_OF_OXIDATIVE_STRESS_INDUCED_INTRINSIC_APOPTOTIC_SIGNALING_PATHWAY		18	0.407274	1.17893	0.254753	0.382768	1	4282	tags=50%, list=25%, signal=67%
GO_REGULATION_OF_FIBROBLAST_GROWTH_FACTOR_RECEPTOR_SIGNALING_PATHWAY	GO_REGULATION_OF_FIBROBLAST_GROWTH_FACTOR_RECEPTOR_SIGNALING_PATHWAY		23	0.477886	1.17832	0.215415	0.383165	1	1737	tags=39%, list=10%, signal=43%
GO_APICAL_JUNCTION_ASSEMBLY	GO_APICAL_JUNCTION_ASSEMBLY		35	0.343136	1.1775	0.235632	0.383989	1	3328	tags=26%, list=19%, signal=32%
GO_ACTIN_FILAMENT_BASED_PROCESS	GO_ACTIN_FILAMENT_BASED_PROCESS		417	0.31349	1.17756	0.159274	0.384189	1	2333	tags=20%, list=14%, signal=23%
GO_CATECHOLAMINE_BIOSYNTHETIC_PROCESS	GO_CATECHOLAMINE_BIOSYNTHETIC_PROCESS		18	0.511381	1.17717	0.237548	0.384241	1	559	tags=17%, list=3%, signal=17%
GO_RHO_PROTEIN_SIGNAL_TRANSDUCTION	GO_RHO_PROTEIN_SIGNAL_TRANSDUCTION		46	0.399371	1.17677	0.219262	0.384629	1	4361	tags=48%, list=25%, signal=64%
GO_RESPONSE_TO_STEROL	GO_RESPONSE_TO_STEROL		22	0.454997	1.17658	0.224696	0.384647	1	3458	tags=45%, list=20%, signal=57%
GO_COFACTOR_TRANSPORT	GO_COFACTOR_TRANSPORT		25	0.41503	1.17584	0.220408	0.385616	1	1751	tags=16%, list=10%, signal=18%
GO_MEMBRANE_PROTEIN_ECTODOMAIN_PROTEOLYSIS	GO_MEMBRANE_PROTEIN_ECTODOMAIN_PROTEOLYSIS		20	0.4966	1.17531	0.262425	0.385715	1	3716	tags=55%, list=22%, signal=70%
GO_NUCLEOSIDE_TRIPHOSPHATE_METABOLIC_PROCESS	GO_NUCLEOSIDE_TRIPHOSPHATE_METABOLIC_PROCESS		189	0.283467	1.17512	0.217039	0.385726	1	4506	tags=30%, list=26%, signal=40%
GO_REGULATION_OF_MEMBRANE_PROTEIN_ECTODOMAIN_PROTEOLYSIS	GO_REGULATION_OF_MEMBRANE_PROTEIN_ECTODOMAIN_PROTEOLYSIS		20	0.525921	1.17544	0.255814	0.385783	1	1114	tags=25%, list=6%, signal=27%
GO_PROSTATE_GLAND_DEVELOPMENT	GO_PROSTATE_GLAND_DEVELOPMENT		40	0.41139	1.17554	0.202405	0.385872	1	1737	tags=20%, list=10%, signal=22%
GO_RESPONSE_TO_ANTIBIOTIC	GO_RESPONSE_TO_ANTIBIOTIC		45	0.410412	1.17463	0.226562	0.386253	1	2155	tags=24%, list=13%, signal=28%
GO_CILIUM_MOVEMENT	GO_CILIUM_MOVEMENT		28	0.533276	1.17341	0.325758	0.386329	1	4422	tags=54%, list=26%, signal=72%
GO_REGULATION_OF_LYMPHOCYTE_CHEMOTAXIS	GO_REGULATION_OF_LYMPHOCYTE_CHEMOTAXIS		18	0.592541	1.1735	0.282306	0.386438	1	2949	tags=44%, list=17%, signal=54%
GO_REGULATED_EXOCYTOSIS	GO_REGULATED_EXOCYTOSIS		200	0.40313	1.17428	0.210421	0.386497	1	2387	tags=30%, list=14%, signal=34%
GO_REGULATION_OF_PROTEIN_TARGETING_TO_MITOCHONDRION	GO_REGULATION_OF_PROTEIN_TARGETING_TO_MITOCHONDRION		82	0.323822	1.17394	0.198473	0.386518	1	2955	tags=22%, list=17%, signal=26%
GO_PROTEIN_REFOLDING	GO_PROTEIN_REFOLDING		19	0.541735	1.17361	0.293333	0.386536	1	2994	tags=37%, list=17%, signal=45%
GO_UROGENITAL_SYSTEM_DEVELOPMENT	GO_UROGENITAL_SYSTEM_DEVELOPMENT		285	0.367413	1.17373	0.158513	0.386582	1	3530	tags=34%, list=21%, signal=43%
GO_PHOSPHOLIPASE_C_ACTIVATING_G_PROTEIN_COUPLED_RECEPTOR_SIGNALING_PATHWAY	GO_PHOSPHOLIPASE_C_ACTIVATING_G_PROTEIN_COUPLED_RECEPTOR_SIGNALING_PATHWAY		80	0.393539	1.17405	0.221344	0.386617	1	2989	tags=16%, list=17%, signal=20%
GO_NEGATIVE_REGULATION_OF_MITOCHONDRION_ORGANIZATION	GO_NEGATIVE_REGULATION_OF_MITOCHONDRION_ORGANIZATION		34	0.387345	1.17293	0.206759	0.386837	1	4289	tags=50%, list=25%, signal=66%
GO_NEGATIVE_REGULATION_OF_G_PROTEIN_COUPLED_RECEPTOR_PROTEIN_SIGNALING_PATHWAY	GO_NEGATIVE_REGULATION_OF_G_PROTEIN_COUPLED_RECEPTOR_PROTEIN_SIGNALING_PATHWAY		37	0.431966	1.17248	0.229008	0.387324	1	2819	tags=19%, list=16%, signal=23%
GO_AMELOGENESIS	GO_AMELOGENESIS		18	0.505117	1.17205	0.272177	0.387783	1	2648	tags=33%, list=15%, signal=39%
GO_BRANCHED_CHAIN_AMINO_ACID_METABOLIC_PROCESS	GO_BRANCHED_CHAIN_AMINO_ACID_METABOLIC_PROCESS		23	0.45767	1.17139	0.25	0.388647	1	1484	tags=17%, list=9%, signal=19%
GO_NEGATIVE_REGULATION_OF_CYSTEINE_TYPE_ENDOPEPTIDASE_ACTIVITY	GO_NEGATIVE_REGULATION_OF_CYSTEINE_TYPE_ENDOPEPTIDASE_ACTIVITY		82	0.610873	1.676	0.00195695	0.38939	0.964	2550	tags=37%, list=15%, signal=43%
GO_CELLULAR_RESPONSE_TO_EPIDERMAL_GROWTH_FACTOR_STIMULUS	GO_CELLULAR_RESPONSE_TO_EPIDERMAL_GROWTH_FACTOR_STIMULUS		22	0.489777	1.17073	0.256262	0.389506	1	802	tags=18%, list=5%, signal=19%
GO_PROTEIN_TETRAMERIZATION	GO_PROTEIN_TETRAMERIZATION		99	0.33564	1.17046	0.173653	0.389673	1	2877	tags=24%, list=17%, signal=29%
GO_REGULATION_OF_PLASMA_MEMBRANE_ORGANIZATION	GO_REGULATION_OF_PLASMA_MEMBRANE_ORGANIZATION		70	0.391587	1.17012	0.225296	0.389963	1	3235	tags=40%, list=19%, signal=49%
GO_REGULATION_OF_RECEPTOR_RECYCLING	GO_REGULATION_OF_RECEPTOR_RECYCLING		19	0.469002	1.16982	0.26	0.390182	1	2185	tags=21%, list=13%, signal=24%
GO_NEGATIVE_REGULATION_OF_NEURAL_PRECURSOR_CELL_PROLIFERATION	GO_NEGATIVE_REGULATION_OF_NEURAL_PRECURSOR_CELL_PROLIFERATION		20	0.452337	1.1695	0.255446	0.390461	1	2942	tags=35%, list=17%, signal=42%
GO_NEGATIVE_REGULATION_OF_EPITHELIAL_CELL_PROLIFERATION	GO_NEGATIVE_REGULATION_OF_EPITHELIAL_CELL_PROLIFERATION		109	0.373568	1.16915	0.198807	0.390772	1	1810	tags=20%, list=11%, signal=22%
GO_CELLULAR_COMPONENT_DISASSEMBLY	GO_CELLULAR_COMPONENT_DISASSEMBLY		472	0.276325	1.16857	0.164751	0.39141	1	2356	tags=16%, list=14%, signal=18%
GO_MESODERM_DEVELOPMENT	GO_MESODERM_DEVELOPMENT		106	0.340387	1.16813	0.162835	0.391909	1	1737	tags=17%, list=10%, signal=19%
GO_NEGATIVE_REGULATION_OF_LYMPHOCYTE_APOPTOTIC_PROCESS	GO_NEGATIVE_REGULATION_OF_LYMPHOCYTE_APOPTOTIC_PROCESS		27	0.427584	1.16737	0.261036	0.392319	1	4080	tags=33%, list=24%, signal=44%
GO_ORGANIC_ANION_TRANSPORT	GO_ORGANIC_ANION_TRANSPORT		346	0.321956	1.16717	0.150943	0.392412	1	2328	tags=18%, list=14%, signal=21%
GO_COFACTOR_BIOSYNTHETIC_PROCESS	GO_COFACTOR_BIOSYNTHETIC_PROCESS		143	0.308903	1.1676	0.207171	0.392484	1	3058	tags=25%, list=18%, signal=30%
GO_DORSAL_VENTRAL_NEURAL_TUBE_PATTERNING	GO_DORSAL_VENTRAL_NEURAL_TUBE_PATTERNING		15	0.458547	1.16741	0.278	0.392551	1	3454	tags=40%, list=20%, signal=50%
GO_INORGANIC_ION_IMPORT_INTO_CELL	GO_INORGANIC_ION_IMPORT_INTO_CELL		15	0.565054	1.16654	0.252988	0.393148	1	2403	tags=40%, list=14%, signal=46%
GO_DEFINITIVE_HEMOPOIESIS	GO_DEFINITIVE_HEMOPOIESIS		16	0.537059	1.16595	0.282908	0.393846	1	3347	tags=38%, list=19%, signal=47%
GO_REGULATION_OF_CYTOPLASMIC_TRANSPORT	GO_REGULATION_OF_CYTOPLASMIC_TRANSPORT		438	0.293468	1.16531	0.143737	0.394324	1	3053	tags=23%, list=18%, signal=27%
GO_REGULATION_OF_DNA_BINDING	GO_REGULATION_OF_DNA_BINDING		89	0.374882	1.16535	0.21161	0.394545	1	2199	tags=22%, list=13%, signal=26%
GO_REGULATION_OF_CYTOSOLIC_CALCIUM_ION_CONCENTRATION	GO_REGULATION_OF_CYTOSOLIC_CALCIUM_ION_CONCENTRATION		194	0.347565	1.16455	0.184959	0.395327	1	2006	tags=18%, list=12%, signal=20%
GO_ACTIVATION_OF_JUN_KINASE_ACTIVITY	GO_ACTIVATION_OF_JUN_KINASE_ACTIVITY		32	0.365021	1.16402	0.245509	0.39536	1	3239	tags=28%, list=19%, signal=35%
GO_EMBRYONIC_ORGAN_DEVELOPMENT	GO_EMBRYONIC_ORGAN_DEVELOPMENT		388	0.348741	1.16356	0.208251	0.395542	1	3698	tags=32%, list=21%, signal=39%
GO_PROTEIN_N_LINKED_GLYCOSYLATION	GO_PROTEIN_N_LINKED_GLYCOSYLATION		73	0.345251	1.16403	0.207294	0.39561	1	5188	tags=56%, list=30%, signal=80%
GO_COENZYME_BIOSYNTHETIC_PROCESS	GO_COENZYME_BIOSYNTHETIC_PROCESS		107	0.331753	1.16367	0.188755	0.395646	1	3058	tags=28%, list=18%, signal=34%
GO_LEFT_RIGHT_PATTERN_FORMATION	GO_LEFT_RIGHT_PATTERN_FORMATION		21	0.456503	1.16316	0.284333	0.395684	1	3709	tags=57%, list=22%, signal=73%
GO_REGULATION_OF_FAT_CELL_DIFFERENTIATION	GO_REGULATION_OF_FAT_CELL_DIFFERENTIATION		96	0.384531	1.16409	0.195072	0.395787	1	2646	tags=30%, list=15%, signal=36%
GO_CELL_SEPARATION_AFTER_CYTOKINESIS	GO_CELL_SEPARATION_AFTER_CYTOKINESIS		17	0.4556	1.16324	0.340426	0.395802	1	5217	tags=41%, list=30%, signal=59%
GO_DISRUPTION_OF_CELLS_OF_OTHER_ORGANISM	GO_DISRUPTION_OF_CELLS_OF_OTHER_ORGANISM		22	0.484586	1.16231	0.295499	0.396815	1	1496	tags=14%, list=9%, signal=15%
GO_REGULATION_OF_INCLUSION_BODY_ASSEMBLY	GO_REGULATION_OF_INCLUSION_BODY_ASSEMBLY		16	0.549418	1.16198	0.291242	0.397093	1	2167	tags=38%, list=13%, signal=43%
GO_SECRETORY_GRANULE_ORGANIZATION	GO_SECRETORY_GRANULE_ORGANIZATION		20	0.394378	1.16156	0.254864	0.397505	1	2356	tags=25%, list=14%, signal=29%
GO_CRANIAL_SKELETAL_SYSTEM_DEVELOPMENT	GO_CRANIAL_SKELETAL_SYSTEM_DEVELOPMENT		55	0.405336	1.16137	0.221344	0.397579	1	3499	tags=33%, list=20%, signal=41%
GO_MUSCLE_SYSTEM_PROCESS	GO_MUSCLE_SYSTEM_PROCESS		271	0.33113	1.16077	0.179592	0.398016	1	2547	tags=21%, list=15%, signal=24%
GO_POSITIVE_REGULATION_OF_PHOSPHATIDYLINOSITOL_3_KINASE_SIGNALING	GO_POSITIVE_REGULATION_OF_PHOSPHATIDYLINOSITOL_3_KINASE_SIGNALING		59	0.420288	1.16019	0.221797	0.398146	1	2183	tags=29%, list=13%, signal=33%
GO_REGULATION_OF_FATTY_ACID_BETA_OXIDATION	GO_REGULATION_OF_FATTY_ACID_BETA_OXIDATION		15	0.472105	1.16078	0.276639	0.398271	1	3662	tags=47%, list=21%, signal=59%
GO_CARDIAC_CELL_DEVELOPMENT	GO_CARDIAC_CELL_DEVELOPMENT		46	0.425478	1.16026	0.232323	0.398312	1	2464	tags=24%, list=14%, signal=28%
GO_SKELETAL_SYSTEM_DEVELOPMENT	GO_SKELETAL_SYSTEM_DEVELOPMENT		425	0.358153	1.16029	0.206413	0.398554	1	3207	tags=29%, list=19%, signal=35%
GO_NEGATIVE_REGULATION_OF_RESPONSE_TO_CYTOKINE_STIMULUS	GO_NEGATIVE_REGULATION_OF_RESPONSE_TO_CYTOKINE_STIMULUS		38	0.619035	1.67635	0	0.398641	0.961	3465	tags=47%, list=20%, signal=59%
GO_PYRIMIDINE_CONTAINING_COMPOUND_CATABOLIC_PROCESS	GO_PYRIMIDINE_CONTAINING_COMPOUND_CATABOLIC_PROCESS		29	0.610596	1.67879	0.0078125	0.399311	0.957	1730	tags=24%, list=10%, signal=27%
GO_FC_GAMMA_RECEPTOR_SIGNALING_PATHWAY	GO_FC_GAMMA_RECEPTOR_SIGNALING_PATHWAY		74	0.380438	1.1593	0.308851	0.399343	1	1686	tags=20%, list=10%, signal=22%
GO_SMOOTH_MUSCLE_TISSUE_DEVELOPMENT	GO_SMOOTH_MUSCLE_TISSUE_DEVELOPMENT		18	0.51056	1.15907	0.260708	0.399411	1	3453	tags=44%, list=20%, signal=56%
GO_REGULATION_OF_ENDOCRINE_PROCESS	GO_REGULATION_OF_ENDOCRINE_PROCESS		46	0.404515	1.15886	0.248521	0.399497	1	1703	tags=17%, list=10%, signal=19%
GO_CONNECTIVE_TISSUE_DEVELOPMENT	GO_CONNECTIVE_TISSUE_DEVELOPMENT		184	0.364577	1.15782	0.197605	0.39953	1	3405	tags=32%, list=20%, signal=39%
GO_RIBONUCLEOSIDE_TRIPHOSPHATE_BIOSYNTHETIC_PROCESS	GO_RIBONUCLEOSIDE_TRIPHOSPHATE_BIOSYNTHETIC_PROCESS		25	0.395634	1.15864	0.257812	0.399556	1	2913	tags=24%, list=17%, signal=29%
GO_ORGANELLE_DISASSEMBLY	GO_ORGANELLE_DISASSEMBLY		170	0.288446	1.15783	0.127907	0.399782	1	2177	tags=16%, list=13%, signal=19%
GO_POSITIVE_REGULATION_OF_CELL_MATRIX_ADHESION	GO_POSITIVE_REGULATION_OF_CELL_MATRIX_ADHESION		37	0.427366	1.15812	0.223709	0.399866	1	2322	tags=30%, list=13%, signal=34%
GO_ACTIVATION_OF_MAPK_ACTIVITY	GO_ACTIVATION_OF_MAPK_ACTIVITY		127	0.339045	1.15792	0.222892	0.399911	1	3239	tags=27%, list=19%, signal=33%
GO_REGULATION_OF_PROTEIN_COMPLEX_ASSEMBLY	GO_REGULATION_OF_PROTEIN_COMPLEX_ASSEMBLY		338	0.302994	1.15825	0.207171	0.399922	1	3613	tags=29%, list=21%, signal=36%
GO_GLUTATHIONE_METABOLIC_PROCESS	GO_GLUTATHIONE_METABOLIC_PROCESS		49	0.389484	1.15679	0.220039	0.400997	1	3298	tags=45%, list=19%, signal=55%
GO_NEGATIVE_REGULATION_OF_ANOIKIS	GO_NEGATIVE_REGULATION_OF_ANOIKIS		17	0.473148	1.15482	0.265849	0.404072	1	2575	tags=35%, list=15%, signal=41%
GO_POSITIVE_REGULATION_OF_IMMUNOGLOBULIN_PRODUCTION	GO_POSITIVE_REGULATION_OF_IMMUNOGLOBULIN_PRODUCTION		29	0.660986	1.68013	0.00390625	0.405826	0.956	3041	tags=41%, list=18%, signal=50%
GO_MUSCLE_ADAPTATION	GO_MUSCLE_ADAPTATION		29	0.429941	1.15025	0.233792	0.406876	1	1169	tags=21%, list=7%, signal=22%
GO_DEVELOPMENTAL_GROWTH_INVOLVED_IN_MORPHOGENESIS	GO_DEVELOPMENTAL_GROWTH_INVOLVED_IN_MORPHOGENESIS		99	0.379867	1.15224	0.1625	0.406885	1	1737	tags=22%, list=10%, signal=25%
GO_RESPONSE_TO_HYDROPEROXIDE	GO_RESPONSE_TO_HYDROPEROXIDE		15	0.56881	1.15203	0.340551	0.40696	1	1118	tags=27%, list=6%, signal=28%
GO_PRIMARY_ALCOHOL_METABOLIC_PROCESS	GO_PRIMARY_ALCOHOL_METABOLIC_PROCESS		44	0.43692	1.15284	0.264344	0.406966	1	2343	tags=25%, list=14%, signal=29%
GO_IN_UTERO_EMBRYONIC_DEVELOPMENT	GO_IN_UTERO_EMBRYONIC_DEVELOPMENT		289	0.297964	1.15235	0.189555	0.406983	1	2278	tags=18%, list=13%, signal=20%
GO_POSITIVE_REGULATION_OF_INTERLEUKIN_1_BETA_PRODUCTION	GO_POSITIVE_REGULATION_OF_INTERLEUKIN_1_BETA_PRODUCTION		27	0.481559	1.1503	0.308151	0.407085	1	2923	tags=37%, list=17%, signal=45%
GO_PEPTIDE_CATABOLIC_PROCESS	GO_PEPTIDE_CATABOLIC_PROCESS		21	0.492625	1.15241	0.301205	0.407153	1	4447	tags=52%, list=26%, signal=71%
GO_REGULATION_OF_CARDIAC_MUSCLE_CELL_CONTRACTION	GO_REGULATION_OF_CARDIAC_MUSCLE_CELL_CONTRACTION		27	0.447902	1.14989	0.247444	0.407188	1	2759	tags=30%, list=16%, signal=35%
GO_REGULATION_OF_OSSIFICATION	GO_REGULATION_OF_OSSIFICATION		161	0.3813	1.15173	0.181102	0.40719	1	1806	tags=25%, list=10%, signal=27%
GO_REGULATION_OF_ACTIN_FILAMENT_BASED_MOVEMENT	GO_REGULATION_OF_ACTIN_FILAMENT_BASED_MOVEMENT		32	0.419315	1.15255	0.251534	0.407191	1	2136	tags=22%, list=12%, signal=25%
GO_EMBRYONIC_HEMOPOIESIS	GO_EMBRYONIC_HEMOPOIESIS		19	0.455477	1.15287	0.289109	0.407197	1	2290	tags=32%, list=13%, signal=36%
GO_RESPONSE_TO_DSRNA	GO_RESPONSE_TO_DSRNA		60	0.340627	1.15054	0.288235	0.407244	1	3354	tags=28%, list=19%, signal=35%
GO_GLYCOSYL_COMPOUND_METABOLIC_PROCESS	GO_GLYCOSYL_COMPOUND_METABOLIC_PROCESS		314	0.269342	1.15071	0.207317	0.407245	1	4205	tags=28%, list=24%, signal=37%
GO_REGULATION_OF_PROTEIN_MODIFICATION_BY_SMALL_PROTEIN_CONJUGATION_OR_REMOVAL	GO_REGULATION_OF_PROTEIN_MODIFICATION_BY_SMALL_PROTEIN_CONJUGATION_OR_REMOVAL		253	0.291544	1.15152	0.245098	0.407267	1	4606	tags=31%, list=27%, signal=41%
GO_VESICLE_ORGANIZATION	GO_VESICLE_ORGANIZATION		248	0.304666	1.15031	0.209877	0.407348	1	2491	tags=21%, list=14%, signal=25%
GO_CELLULAR_METABOLIC_COMPOUND_SALVAGE	GO_CELLULAR_METABOLIC_COMPOUND_SALVAGE		34	0.369421	1.15124	0.2393	0.407485	1	4840	tags=44%, list=28%, signal=61%
GO_NEGATIVE_REGULATION_OF_ANION_TRANSPORT	GO_NEGATIVE_REGULATION_OF_ANION_TRANSPORT		32	0.434079	1.15072	0.245614	0.407515	1	3738	tags=41%, list=22%, signal=52%
GO_REGULATION_OF_CELLULAR_PROTEIN_CATABOLIC_PROCESS	GO_REGULATION_OF_CELLULAR_PROTEIN_CATABOLIC_PROCESS		246	0.309165	1.15086	0.27907	0.407582	1	4639	tags=33%, list=27%, signal=44%
GO_CARTILAGE_DEVELOPMENT	GO_CARTILAGE_DEVELOPMENT		140	0.374945	1.15093	0.200397	0.407739	1	2413	tags=24%, list=14%, signal=28%
GO_NEGATIVE_REGULATION_OF_INTRACELLULAR_TRANSPORT	GO_NEGATIVE_REGULATION_OF_INTRACELLULAR_TRANSPORT		132	0.310794	1.149	0.182353	0.408118	1	3536	tags=29%, list=21%, signal=36%
GO_GPI_ANCHOR_METABOLIC_PROCESS	GO_GPI_ANCHOR_METABOLIC_PROCESS		33	0.368462	1.14844	0.30297	0.408248	1	5315	tags=52%, list=31%, signal=74%
GO_INFLAMMATORY_RESPONSE_TO_ANTIGENIC_STIMULUS	GO_INFLAMMATORY_RESPONSE_TO_ANTIGENIC_STIMULUS		23	0.433399	1.14907	0.287645	0.408287	1	4194	tags=43%, list=24%, signal=57%
GO_CELL_PROJECTION_ASSEMBLY	GO_CELL_PROJECTION_ASSEMBLY		226	0.344459	1.1485	0.283054	0.408433	1	2802	tags=24%, list=16%, signal=29%
GO_NEGATIVE_REGULATION_OF_PHOSPHORUS_METABOLIC_PROCESS	GO_NEGATIVE_REGULATION_OF_PHOSPHORUS_METABOLIC_PROCESS		499	0.31849	1.14796	0.139165	0.408505	1	3095	tags=27%, list=18%, signal=32%
GO_NUCLEOBASE_METABOLIC_PROCESS	GO_NUCLEOBASE_METABOLIC_PROCESS		36	0.399569	1.14809	0.234862	0.408576	1	4048	tags=36%, list=24%, signal=47%
GO_REGULATION_OF_DEFENSE_RESPONSE_TO_VIRUS_BY_HOST	GO_REGULATION_OF_DEFENSE_RESPONSE_TO_VIRUS_BY_HOST		112	0.319732	1.14852	0.187856	0.408666	1	3145	tags=27%, list=18%, signal=33%
GO_NEGATIVE_REGULATION_OF_CYTOKINE_BIOSYNTHETIC_PROCESS	GO_NEGATIVE_REGULATION_OF_CYTOKINE_BIOSYNTHETIC_PROCESS		28	0.705712	1.68794	0.00377358	0.409742	0.946	2816	tags=57%, list=16%, signal=68%
GO_GOLGI_TO_PLASMA_MEMBRANE_PROTEIN_TRANSPORT	GO_GOLGI_TO_PLASMA_MEMBRANE_PROTEIN_TRANSPORT		24	0.415326	1.14604	0.28827	0.411559	1	1830	tags=17%, list=11%, signal=19%
GO_REGULATION_OF_STAT_CASCADE	GO_REGULATION_OF_STAT_CASCADE		138	0.340015	1.14539	0.220238	0.411798	1	3187	tags=27%, list=19%, signal=33%
GO_REGULATION_OF_LIPID_STORAGE	GO_REGULATION_OF_LIPID_STORAGE		40	0.392469	1.14571	0.267606	0.411839	1	2660	tags=28%, list=15%, signal=32%
GO_RESPONSE_TO_RADIATION	GO_RESPONSE_TO_RADIATION		380	0.296248	1.14547	0.188605	0.411941	1	3087	tags=20%, list=18%, signal=24%
GO_EPITHELIAL_CELL_DIFFERENTIATION_INVOLVED_IN_KIDNEY_DEVELOPMENT	GO_EPITHELIAL_CELL_DIFFERENTIATION_INVOLVED_IN_KIDNEY_DEVELOPMENT		23	0.478637	1.1449	0.279208	0.412068	1	1308	tags=26%, list=8%, signal=28%
GO_REGULATION_OF_MUSCLE_CELL_DIFFERENTIATION	GO_REGULATION_OF_MUSCLE_CELL_DIFFERENTIATION		142	0.32308	1.1449	0.178279	0.412349	1	2931	tags=27%, list=17%, signal=32%
GO_RESPONSE_TO_INSULIN	GO_RESPONSE_TO_INSULIN		196	0.292889	1.14284	0.206827	0.41304	1	3484	tags=27%, list=20%, signal=34%
GO_HEART_DEVELOPMENT	GO_HEART_DEVELOPMENT		432	0.316244	1.14356	0.182353	0.413207	1	2464	tags=20%, list=14%, signal=23%
GO_REGULATION_OF_ENDOPLASMIC_RETICULUM_STRESS_INDUCED_INTRINSIC_APOPTOTIC_SIGNALING_PATHWAY	GO_REGULATION_OF_ENDOPLASMIC_RETICULUM_STRESS_INDUCED_INTRINSIC_APOPTOTIC_SIGNALING_PATHWAY		26	0.378171	1.14406	0.286822	0.413209	1	4385	tags=46%, list=25%, signal=62%
GO_POSITIVE_REGULATION_OF_LEUKOCYTE_APOPTOTIC_PROCESS	GO_POSITIVE_REGULATION_OF_LEUKOCYTE_APOPTOTIC_PROCESS		26	0.507016	1.14371	0.270751	0.413222	1	2707	tags=38%, list=16%, signal=46%
GO_NEGATIVE_REGULATION_OF_CARTILAGE_DEVELOPMENT	GO_NEGATIVE_REGULATION_OF_CARTILAGE_DEVELOPMENT		22	0.475427	1.14383	0.254545	0.413291	1	3352	tags=41%, list=19%, signal=51%
GO_VESICLE_COATING	GO_VESICLE_COATING		70	0.347953	1.14284	0.263889	0.413311	1	2827	tags=29%, list=16%, signal=34%
GO_PYRIMIDINE_NUCLEOSIDE_CATABOLIC_PROCESS	GO_PYRIMIDINE_NUCLEOSIDE_CATABOLIC_PROCESS		19	0.775191	1.69021	0	0.413412	0.943	1730	tags=37%, list=10%, signal=41%
GO_RESPONSE_TO_ACTIVITY	GO_RESPONSE_TO_ACTIVITY		65	0.342455	1.14327	0.212425	0.413435	1	1703	tags=12%, list=10%, signal=14%
GO_LIPID_MODIFICATION	GO_LIPID_MODIFICATION		188	0.293235	1.14293	0.210953	0.413436	1	3891	tags=31%, list=23%, signal=39%
GO_NEGATIVE_REGULATION_OF_ESTABLISHMENT_OF_PROTEIN_LOCALIZATION	GO_NEGATIVE_REGULATION_OF_ESTABLISHMENT_OF_PROTEIN_LOCALIZATION		197	0.300171	1.14303	0.194332	0.413558	1	3647	tags=30%, list=21%, signal=38%
GO_REGULATION_OF_WNT_SIGNALING_PATHWAY	GO_REGULATION_OF_WNT_SIGNALING_PATHWAY		289	0.305242	1.14216	0.182	0.413591	1	2697	tags=23%, list=16%, signal=27%
GO_POSITIVE_REGULATION_OF_PROTEASOMAL_PROTEIN_CATABOLIC_PROCESS	GO_POSITIVE_REGULATION_OF_PROTEASOMAL_PROTEIN_CATABOLIC_PROCESS		91	0.323337	1.14217	0.254438	0.413855	1	4316	tags=37%, list=25%, signal=50%
GO_NEGATIVE_REGULATION_OF_PROTEIN_SERINE_THREONINE_KINASE_ACTIVITY	GO_NEGATIVE_REGULATION_OF_PROTEIN_SERINE_THREONINE_KINASE_ACTIVITY		119	0.350142	1.14146	0.227799	0.414452	1	3366	tags=33%, list=20%, signal=40%
GO_REGULATION_OF_ACTIN_NUCLEATION	GO_REGULATION_OF_ACTIN_NUCLEATION		25	0.390161	1.14106	0.284872	0.414839	1	4459	tags=48%, list=26%, signal=65%
GO_NEGATIVE_REGULATION_OF_FAT_CELL_DIFFERENTIATION	GO_NEGATIVE_REGULATION_OF_FAT_CELL_DIFFERENTIATION		37	0.41781	1.14061	0.243714	0.415329	1	2825	tags=38%, list=16%, signal=45%
GO_TISSUE_MIGRATION	GO_TISSUE_MIGRATION		76	0.41191	1.14015	0.240157	0.415866	1	1060	tags=20%, list=6%, signal=21%
GO_NUCLEOTIDE_EXCISION_REPAIR_DNA_DAMAGE_RECOGNITION	GO_NUCLEOTIDE_EXCISION_REPAIR_DNA_DAMAGE_RECOGNITION		22	0.330375	1.13963	0.295858	0.415921	1	406	tags=5%, list=2%, signal=5%
GO_SPHINGOLIPID_METABOLIC_PROCESS	GO_SPHINGOLIPID_METABOLIC_PROCESS		116	0.319656	1.13993	0.216867	0.415985	1	3103	tags=28%, list=18%, signal=34%
GO_SULFUR_COMPOUND_CATABOLIC_PROCESS	GO_SULFUR_COMPOUND_CATABOLIC_PROCESS		38	0.43885	1.13975	0.279261	0.416025	1	1972	tags=34%, list=11%, signal=39%
GO_CELLULAR_RESPONSE_TO_PH	GO_CELLULAR_RESPONSE_TO_PH		15	0.447035	1.13916	0.306584	0.416425	1	1891	tags=20%, list=11%, signal=22%
GO_REGULATION_OF_MONOOXYGENASE_ACTIVITY	GO_REGULATION_OF_MONOOXYGENASE_ACTIVITY		58	0.359032	1.13853	0.248473	0.41668	1	4108	tags=33%, list=24%, signal=43%
GO_REGULATION_OF_BINDING	GO_REGULATION_OF_BINDING		268	0.309027	1.13869	0.197343	0.416692	1	2911	tags=24%, list=17%, signal=28%
GO_REGULATION_OF_SPINDLE_ORGANIZATION	GO_REGULATION_OF_SPINDLE_ORGANIZATION		19	0.441078	1.13869	0.319444	0.41697	1	4045	tags=32%, list=24%, signal=41%
GO_RESPONSE_TO_OXYGEN_RADICAL	GO_RESPONSE_TO_OXYGEN_RADICAL		18	0.715421	1.68019	0.00392157	0.417949	0.955	2031	tags=44%, list=12%, signal=50%
GO_REGULATION_OF_EPIDERMAL_CELL_DIFFERENTIATION	GO_REGULATION_OF_EPIDERMAL_CELL_DIFFERENTIATION		38	0.389958	1.13755	0.267717	0.418012	1	1181	tags=16%, list=7%, signal=17%
GO_VENTRICULAR_SYSTEM_DEVELOPMENT	GO_VENTRICULAR_SYSTEM_DEVELOPMENT		24	0.449976	1.13675	0.307116	0.419051	1	3866	tags=50%, list=22%, signal=64%
GO_PURINE_NUCLEOBASE_METABOLIC_PROCESS	GO_PURINE_NUCLEOBASE_METABOLIC_PROCESS		18	0.500312	1.13586	0.273921	0.419222	1	2877	tags=33%, list=17%, signal=40%
GO_POSITIVE_REGULATION_OF_CELLULAR_AMIDE_METABOLIC_PROCESS	GO_POSITIVE_REGULATION_OF_CELLULAR_AMIDE_METABOLIC_PROCESS		91	0.313937	1.13646	0.257752	0.419285	1	2345	tags=18%, list=14%, signal=20%
GO_GOLGI_TO_ENDOSOME_TRANSPORT	GO_GOLGI_TO_ENDOSOME_TRANSPORT		15	0.440491	1.13625	0.333333	0.419384	1	3430	tags=40%, list=20%, signal=50%
GO_REGULATION_OF_POSITIVE_CHEMOTAXIS	GO_REGULATION_OF_POSITIVE_CHEMOTAXIS		22	0.499863	1.1361	0.28373	0.419386	1	2223	tags=32%, list=13%, signal=36%
GO_EMBRYONIC_FORELIMB_MORPHOGENESIS	GO_EMBRYONIC_FORELIMB_MORPHOGENESIS		31	0.473647	1.13592	0.29207	0.419422	1	2528	tags=26%, list=15%, signal=30%
GO_THYMIC_T_CELL_SELECTION	GO_THYMIC_T_CELL_SELECTION		19	0.733828	1.68278	0.00193424	0.419598	0.951	2154	tags=32%, list=13%, signal=36%
GO_NUCLEOSIDE_MONOPHOSPHATE_METABOLIC_PROCESS	GO_NUCLEOSIDE_MONOPHOSPHATE_METABOLIC_PROCESS		202	0.268763	1.13548	0.25502	0.419618	1	4193	tags=26%, list=24%, signal=34%
GO_REGULATION_OF_INTERLEUKIN_13_PRODUCTION	GO_REGULATION_OF_INTERLEUKIN_13_PRODUCTION		17	0.463401	1.13487	0.299611	0.420361	1	4194	tags=59%, list=24%, signal=78%
GO_CELLULAR_RESPONSE_TO_LITHIUM_ION	GO_CELLULAR_RESPONSE_TO_LITHIUM_ION		17	0.468901	1.13335	0.293651	0.420407	1	2878	tags=24%, list=17%, signal=28%
GO_NEGATIVE_REGULATION_OF_CYCLIN_DEPENDENT_PROTEIN_KINASE_ACTIVITY	GO_NEGATIVE_REGULATION_OF_CYCLIN_DEPENDENT_PROTEIN_KINASE_ACTIVITY		28	0.408041	1.13446	0.284895	0.420483	1	2686	tags=32%, list=16%, signal=38%
GO_RESPONSE_TO_ISCHEMIA	GO_RESPONSE_TO_ISCHEMIA		26	0.421807	1.13426	0.271222	0.420528	1	1449	tags=23%, list=8%, signal=25%
GO_CELL_PROLIFERATION_IN_FOREBRAIN	GO_CELL_PROLIFERATION_IN_FOREBRAIN		26	0.433613	1.13459	0.230916	0.420565	1	3616	tags=46%, list=21%, signal=58%
GO_MONOVALENT_INORGANIC_CATION_HOMEOSTASIS	GO_MONOVALENT_INORGANIC_CATION_HOMEOSTASIS		115	0.316258	1.13308	0.243408	0.420587	1	3960	tags=30%, list=23%, signal=38%
GO_TUBE_MORPHOGENESIS	GO_TUBE_MORPHOGENESIS		308	0.328732	1.13336	0.209073	0.420655	1	3678	tags=32%, list=21%, signal=41%
GO_ACTIN_FILAMENT_BASED_MOVEMENT	GO_ACTIN_FILAMENT_BASED_MOVEMENT		90	0.340594	1.13365	0.263158	0.420736	1	2136	tags=21%, list=12%, signal=24%
GO_PROTEIN_SECRETION	GO_PROTEIN_SECRETION		104	0.36336	1.13346	0.237548	0.42078	1	1704	tags=18%, list=10%, signal=20%
GO_OSTEOBLAST_DEVELOPMENT	GO_OSTEOBLAST_DEVELOPMENT		18	0.456622	1.13392	0.283058	0.420859	1	816	tags=11%, list=5%, signal=12%
GO_POSITIVE_REGULATION_OF_SUBSTRATE_ADHESION_DEPENDENT_CELL_SPREADING	GO_POSITIVE_REGULATION_OF_SUBSTRATE_ADHESION_DEPENDENT_CELL_SPREADING		26	0.411094	1.13373	0.294821	0.420864	1	2103	tags=27%, list=12%, signal=31%
GO_NUCLEOBASE_CONTAINING_SMALL_MOLECULE_METABOLIC_PROCESS	GO_NUCLEOBASE_CONTAINING_SMALL_MOLECULE_METABOLIC_PROCESS		458	0.26461	1.13226	0.207585	0.421704	1	3095	tags=19%, list=18%, signal=22%
GO_NEGATIVE_REGULATION_OF_NF_KAPPAB_IMPORT_INTO_NUCLEUS	GO_NEGATIVE_REGULATION_OF_NF_KAPPAB_IMPORT_INTO_NUCLEUS		16	0.412877	1.13202	0.298	0.421842	1	2921	tags=38%, list=17%, signal=45%
GO_MEMBRANE_BUDDING	GO_MEMBRANE_BUDDING		107	0.301349	1.13181	0.268687	0.421913	1	2491	tags=21%, list=14%, signal=24%
GO_GLUCOSAMINE_CONTAINING_COMPOUND_METABOLIC_PROCESS	GO_GLUCOSAMINE_CONTAINING_COMPOUND_METABOLIC_PROCESS		23	0.747102	1.69137	0	0.422825	0.942	649	tags=26%, list=4%, signal=27%
GO_POSITIVE_REGULATION_OF_LAMELLIPODIUM_ORGANIZATION	GO_POSITIVE_REGULATION_OF_LAMELLIPODIUM_ORGANIZATION		22	0.372833	1.13048	0.325153	0.423289	1	4047	tags=41%, list=24%, signal=53%
GO_REGULATION_OF_FEEDING_BEHAVIOR	GO_REGULATION_OF_FEEDING_BEHAVIOR		19	0.41065	1.13014	0.306641	0.423356	1	3624	tags=32%, list=21%, signal=40%
GO_RESPONSE_TO_AMINE	GO_RESPONSE_TO_AMINE		48	0.389586	1.13055	0.262605	0.42345	1	1873	tags=19%, list=11%, signal=21%
GO_NEGATIVE_REGULATION_OF_LIPID_STORAGE	GO_NEGATIVE_REGULATION_OF_LIPID_STORAGE		17	0.478383	1.13015	0.329341	0.423598	1	4309	tags=53%, list=25%, signal=71%
GO_REGULATION_OF_CANONICAL_WNT_SIGNALING_PATHWAY	GO_REGULATION_OF_CANONICAL_WNT_SIGNALING_PATHWAY		220	0.308147	1.13061	0.199219	0.423625	1	2697	tags=24%, list=16%, signal=28%
GO_CELLULAR_RESPONSE_TO_GROWTH_HORMONE_STIMULUS	GO_CELLULAR_RESPONSE_TO_GROWTH_HORMONE_STIMULUS		20	0.412291	1.12928	0.307102	0.42372	1	2866	tags=25%, list=17%, signal=30%
GO_REGULATION_OF_PHOSPHATIDYLINOSITOL_3_KINASE_SIGNALING	GO_REGULATION_OF_PHOSPHATIDYLINOSITOL_3_KINASE_SIGNALING		132	0.35193	1.12939	0.23062	0.423793	1	3662	tags=33%, list=21%, signal=41%
GO_OVULATION_CYCLE_PROCESS	GO_OVULATION_CYCLE_PROCESS		85	0.344183	1.12955	0.212237	0.423802	1	2733	tags=24%, list=16%, signal=28%
GO_MYOTUBE_DIFFERENTIATION	GO_MYOTUBE_DIFFERENTIATION		47	0.35193	1.12829	0.285996	0.423967	1	925	tags=11%, list=5%, signal=11%
GO_CORTICAL_CYTOSKELETON_ORGANIZATION	GO_CORTICAL_CYTOSKELETON_ORGANIZATION		32	0.386129	1.12956	0.268245	0.424049	1	3537	tags=34%, list=21%, signal=43%
GO_MACROAUTOPHAGY	GO_MACROAUTOPHAGY		236	0.267912	1.12836	0.182377	0.424127	1	2430	tags=16%, list=14%, signal=18%
GO_POSITIVE_REGULATION_OF_LIPID_TRANSPORT	GO_POSITIVE_REGULATION_OF_LIPID_TRANSPORT		49	0.379982	1.12803	0.248408	0.42413	1	2616	tags=31%, list=15%, signal=36%
GO_POSITIVE_REGULATION_OF_T_CELL_MEDIATED_IMMUNITY	GO_POSITIVE_REGULATION_OF_T_CELL_MEDIATED_IMMUNITY		29	0.39633	1.12838	0.297244	0.424377	1	4595	tags=55%, list=27%, signal=75%
GO_ORGANIC_CYCLIC_COMPOUND_CATABOLIC_PROCESS	GO_ORGANIC_CYCLIC_COMPOUND_CATABOLIC_PROCESS		355	0.24627	1.1285	0.188571	0.424486	1	2155	tags=12%, list=13%, signal=14%
GO_DEVELOPMENTAL_GROWTH	GO_DEVELOPMENTAL_GROWTH		304	0.323182	1.12864	0.182004	0.424528	1	1932	tags=18%, list=11%, signal=20%
GO_REGULATION_OF_VIRAL_ENTRY_INTO_HOST_CELL	GO_REGULATION_OF_VIRAL_ENTRY_INTO_HOST_CELL		26	0.714188	1.6943	0.00380228	0.424729	0.937	2499	tags=46%, list=15%, signal=54%
GO_PYRIDINE_CONTAINING_COMPOUND_BIOSYNTHETIC_PROCESS	GO_PYRIDINE_CONTAINING_COMPOUND_BIOSYNTHETIC_PROCESS		16	0.480438	1.12723	0.307692	0.424924	1	3032	tags=56%, list=18%, signal=68%
GO_POSITIVE_REGULATION_OF_G1_S_TRANSITION_OF_MITOTIC_CELL_CYCLE	GO_POSITIVE_REGULATION_OF_G1_S_TRANSITION_OF_MITOTIC_CELL_CYCLE		24	0.428904	1.12738	0.301397	0.424947	1	2277	tags=25%, list=13%, signal=29%
GO_REGULATION_OF_OSTEOBLAST_DIFFERENTIATION	GO_REGULATION_OF_OSTEOBLAST_DIFFERENTIATION		101	0.384801	1.12676	0.219959	0.425411	1	1612	tags=25%, list=9%, signal=27%
GO_REGULATION_OF_PRI_MIRNA_TRANSCRIPTION_FROM_RNA_POLYMERASE_II_PROMOTER	GO_REGULATION_OF_PRI_MIRNA_TRANSCRIPTION_FROM_RNA_POLYMERASE_II_PROMOTER		17	0.431986	1.12655	0.326923	0.425495	1	2878	tags=35%, list=17%, signal=42%
GO_NEGATIVE_REGULATION_OF_OSTEOCLAST_DIFFERENTIATION	GO_NEGATIVE_REGULATION_OF_OSTEOCLAST_DIFFERENTIATION		23	0.487593	1.12618	0.317308	0.425567	1	2885	tags=39%, list=17%, signal=47%
GO_NEGATIVE_REGULATION_OF_REPRODUCTIVE_PROCESS	GO_NEGATIVE_REGULATION_OF_REPRODUCTIVE_PROCESS		48	0.380851	1.1262	0.241449	0.425803	1	2339	tags=23%, list=14%, signal=26%
GO_T_CELL_RECEPTOR_SIGNALING_PATHWAY	GO_T_CELL_RECEPTOR_SIGNALING_PATHWAY		133	0.323769	1.12533	0.351923	0.426249	1	3210	tags=24%, list=19%, signal=29%
GO_POSITIVE_REGULATION_OF_CANONICAL_WNT_SIGNALING_PATHWAY	GO_POSITIVE_REGULATION_OF_CANONICAL_WNT_SIGNALING_PATHWAY		111	0.301386	1.12547	0.223577	0.426268	1	3204	tags=25%, list=19%, signal=31%
GO_INNER_EAR_RECEPTOR_STEREOCILIUM_ORGANIZATION	GO_INNER_EAR_RECEPTOR_STEREOCILIUM_ORGANIZATION		17	0.464174	1.12564	0.27821	0.426283	1	576	tags=18%, list=3%, signal=18%
GO_MUSCLE_FIBER_DEVELOPMENT	GO_MUSCLE_FIBER_DEVELOPMENT		39	0.398474	1.12497	0.266	0.426588	1	622	tags=13%, list=4%, signal=13%
GO_CELL_REDOX_HOMEOSTASIS	GO_CELL_REDOX_HOMEOSTASIS		60	0.596523	1.69711	0.0056926	0.427082	0.933	2593	tags=40%, list=15%, signal=47%
GO_LIPID_STORAGE	GO_LIPID_STORAGE		26	0.437365	1.12436	0.268431	0.42709	1	1125	tags=19%, list=7%, signal=21%
GO_CELLULAR_AMINO_ACID_BIOSYNTHETIC_PROCESS	GO_CELLULAR_AMINO_ACID_BIOSYNTHETIC_PROCESS		84	0.354752	1.12451	0.283058	0.427097	1	2904	tags=26%, list=17%, signal=31%
GO_EXOCYTOSIS	GO_EXOCYTOSIS		279	0.347889	1.12417	0.257485	0.427163	1	2534	tags=26%, list=15%, signal=30%
GO_POSITIVE_REGULATION_OF_AUTOPHAGY	GO_POSITIVE_REGULATION_OF_AUTOPHAGY		73	0.299312	1.12389	0.267857	0.427402	1	4147	tags=34%, list=24%, signal=45%
GO_GLIAL_CELL_MIGRATION	GO_GLIAL_CELL_MIGRATION		33	0.438699	1.12305	0.249513	0.427783	1	1806	tags=36%, list=10%, signal=41%
GO_REGULATION_OF_PLATELET_AGGREGATION	GO_REGULATION_OF_PLATELET_AGGREGATION		16	0.475062	1.12234	0.331361	0.427951	1	3479	tags=44%, list=20%, signal=55%
GO_N_GLYCAN_PROCESSING	GO_N_GLYCAN_PROCESSING		19	0.462271	1.12323	0.296875	0.428024	1	1958	tags=37%, list=11%, signal=42%
GO_REGULATION_OF_TRANSMEMBRANE_RECEPTOR_PROTEIN_SERINE_THREONINE_KINASE_SIGNALING_PATHWAY	GO_REGULATION_OF_TRANSMEMBRANE_RECEPTOR_PROTEIN_SERINE_THREONINE_KINASE_SIGNALING_PATHWAY		187	0.349132	1.12306	0.229675	0.428041	1	2402	tags=24%, list=14%, signal=28%
GO_MESENCHYMAL_TO_EPITHELIAL_TRANSITION	GO_MESENCHYMAL_TO_EPITHELIAL_TRANSITION		15	0.482104	1.12336	0.304781	0.428067	1	4373	tags=53%, list=25%, signal=71%
GO_VACUOLAR_TRANSPORT	GO_VACUOLAR_TRANSPORT		214	0.238828	1.12203	0.265306	0.428157	1	4096	tags=25%, list=24%, signal=32%
GO_NEGATIVE_REGULATION_OF_TRANSMEMBRANE_TRANSPORT	GO_NEGATIVE_REGULATION_OF_TRANSMEMBRANE_TRANSPORT		79	0.340525	1.12254	0.232	0.428186	1	3933	tags=30%, list=23%, signal=39%
GO_SIGNAL_TRANSDUCTION_BY_PROTEIN_PHOSPHORYLATION	GO_SIGNAL_TRANSDUCTION_BY_PROTEIN_PHOSPHORYLATION		381	0.270396	1.12234	0.203666	0.428227	1	3314	tags=25%, list=19%, signal=30%
GO_RETINOL_METABOLIC_PROCESS	GO_RETINOL_METABOLIC_PROCESS		26	0.49274	1.12257	0.292339	0.428402	1	2148	tags=35%, list=12%, signal=39%
GO_RESPONSE_TO_ATP	GO_RESPONSE_TO_ATP		30	0.442862	1.12164	0.277559	0.428536	1	1073	tags=20%, list=6%, signal=21%
GO_NEGATIVE_REGULATION_OF_KINASE_ACTIVITY	GO_NEGATIVE_REGULATION_OF_KINASE_ACTIVITY		232	0.319442	1.12114	0.215116	0.429142	1	2905	tags=28%, list=17%, signal=33%
GO_REGULATION_OF_ACTIN_FILAMENT_BUNDLE_ASSEMBLY	GO_REGULATION_OF_ACTIN_FILAMENT_BUNDLE_ASSEMBLY		69	0.355635	1.12012	0.261044	0.430584	1	1891	tags=22%, list=11%, signal=24%
GO_REGULATION_OF_LAMELLIPODIUM_ORGANIZATION	GO_REGULATION_OF_LAMELLIPODIUM_ORGANIZATION		33	0.348024	1.11937	0.292585	0.431576	1	4047	tags=39%, list=24%, signal=51%
GO_REGULATION_OF_OXIDATIVE_STRESS_INDUCED_INTRINSIC_APOPTOTIC_SIGNALING_PATHWAY	GO_REGULATION_OF_OXIDATIVE_STRESS_INDUCED_INTRINSIC_APOPTOTIC_SIGNALING_PATHWAY		26	0.35009	1.11909	0.306641	0.431762	1	2703	tags=27%, list=16%, signal=32%
GO_NEGATIVE_REGULATION_OF_WNT_SIGNALING_PATHWAY	GO_NEGATIVE_REGULATION_OF_WNT_SIGNALING_PATHWAY		185	0.314404	1.11863	0.248509	0.431962	1	2697	tags=25%, list=16%, signal=29%
GO_CELLULAR_RESPONSE_TO_ANTIBIOTIC	GO_CELLULAR_RESPONSE_TO_ANTIBIOTIC		16	0.467978	1.11875	0.322134	0.432048	1	1891	tags=44%, list=11%, signal=49%
GO_CIRCADIAN_REGULATION_OF_GENE_EXPRESSION	GO_CIRCADIAN_REGULATION_OF_GENE_EXPRESSION		51	0.324568	1.11793	0.27459	0.432556	1	1187	tags=16%, list=7%, signal=17%
GO_ORGANIC_ACID_CATABOLIC_PROCESS	GO_ORGANIC_ACID_CATABOLIC_PROCESS		192	0.328639	1.11808	0.28629	0.432612	1	3122	tags=26%, list=18%, signal=31%
GO_REGULATION_OF_PEPTIDASE_ACTIVITY	GO_REGULATION_OF_PEPTIDASE_ACTIVITY		356	0.543278	1.69942	0	0.433063	0.929	2955	tags=31%, list=17%, signal=37%
GO_ANAPHASE_PROMOTING_COMPLEX_DEPENDENT_CATABOLIC_PROCESS	GO_ANAPHASE_PROMOTING_COMPLEX_DEPENDENT_CATABOLIC_PROCESS		69	0.444246	1.11625	0.440613	0.43516	1	3211	tags=25%, list=19%, signal=30%
GO_ANION_HOMEOSTASIS	GO_ANION_HOMEOSTASIS		39	0.367795	1.11591	0.27907	0.435499	1	194	tags=8%, list=1%, signal=8%
GO_REGULATION_OF_RECEPTOR_INTERNALIZATION	GO_REGULATION_OF_RECEPTOR_INTERNALIZATION		36	0.413879	1.11551	0.261411	0.435872	1	1666	tags=25%, list=10%, signal=28%
GO_MUSCLE_CELL_DEVELOPMENT	GO_MUSCLE_CELL_DEVELOPMENT		116	0.341638	1.11499	0.243461	0.436505	1	2530	tags=19%, list=15%, signal=22%
GO_POSITIVE_REGULATION_OF_OSTEOBLAST_DIFFERENTIATION	GO_POSITIVE_REGULATION_OF_OSTEOBLAST_DIFFERENTIATION		56	0.42178	1.11425	0.255578	0.437523	1	1806	tags=29%, list=10%, signal=32%
GO_CELLULAR_RESPONSE_TO_LIGHT_STIMULUS	GO_CELLULAR_RESPONSE_TO_LIGHT_STIMULUS		84	0.333019	1.11384	0.282	0.437922	1	3444	tags=25%, list=20%, signal=31%
GO_REGULATION_OF_NEURAL_PRECURSOR_CELL_PROLIFERATION	GO_REGULATION_OF_NEURAL_PRECURSOR_CELL_PROLIFERATION		67	0.388735	1.11322	0.25498	0.438706	1	2697	tags=30%, list=16%, signal=35%
GO_REGULATION_OF_CELLULAR_COMPONENT_SIZE	GO_REGULATION_OF_CELLULAR_COMPONENT_SIZE		311	0.293571	1.11237	0.247563	0.439876	1	3484	tags=28%, list=20%, signal=34%
GO_OUTFLOW_TRACT_MORPHOGENESIS	GO_OUTFLOW_TRACT_MORPHOGENESIS		56	0.424169	1.11097	0.247582	0.441999	1	1737	tags=25%, list=10%, signal=28%
GO_POSITIVE_REGULATION_OF_FAT_CELL_DIFFERENTIATION	GO_POSITIVE_REGULATION_OF_FAT_CELL_DIFFERENTIATION		46	0.41553	1.11054	0.282427	0.442504	1	2446	tags=30%, list=14%, signal=35%
GO_POSITIVE_REGULATION_OF_EPITHELIAL_CELL_PROLIFERATION	GO_POSITIVE_REGULATION_OF_EPITHELIAL_CELL_PROLIFERATION		144	0.373447	1.11012	0.249042	0.442926	1	1771	tags=21%, list=10%, signal=23%
GO_MUSCLE_CONTRACTION	GO_MUSCLE_CONTRACTION		225	0.318303	1.10915	0.26694	0.443182	1	2534	tags=19%, list=15%, signal=22%
GO_EPITHELIAL_CILIUM_MOVEMENT	GO_EPITHELIAL_CILIUM_MOVEMENT		15	0.525717	1.10928	0.395522	0.443246	1	3897	tags=53%, list=23%, signal=69%
GO_NEGATIVE_REGULATION_OF_STEM_CELL_DIFFERENTIATION	GO_NEGATIVE_REGULATION_OF_STEM_CELL_DIFFERENTIATION		40	0.39273	1.10937	0.247525	0.443365	1	1313	tags=20%, list=8%, signal=22%
GO_RETINA_HOMEOSTASIS	GO_RETINA_HOMEOSTASIS		59	0.356747	1.10963	0.299595	0.443506	1	1721	tags=15%, list=10%, signal=17%
GO_REGULATION_OF_RELEASE_OF_CYTOCHROME_C_FROM_MITOCHONDRIA	GO_REGULATION_OF_RELEASE_OF_CYTOCHROME_C_FROM_MITOCHONDRIA		41	0.384184	1.10945	0.306513	0.44351	1	3354	tags=39%, list=19%, signal=48%
GO_PURINERGIC_RECEPTOR_SIGNALING_PATHWAY	GO_PURINERGIC_RECEPTOR_SIGNALING_PATHWAY		26	0.469949	1.1082	0.347913	0.444259	1	3654	tags=50%, list=21%, signal=63%
GO_REGULATION_OF_CARDIAC_MUSCLE_CONTRACTION	GO_REGULATION_OF_CARDIAC_MUSCLE_CONTRACTION		64	0.343863	1.10836	0.293651	0.444274	1	3002	tags=27%, list=17%, signal=32%
GO_T_CELL_SELECTION	GO_T_CELL_SELECTION		36	0.68474	1.70041	0.00378072	0.445014	0.926	2295	tags=33%, list=13%, signal=38%
GO_EPITHELIAL_CELL_PROLIFERATION	GO_EPITHELIAL_CELL_PROLIFERATION		84	0.342566	1.10723	0.268102	0.445708	1	1737	tags=18%, list=10%, signal=20%
GO_RESPONSE_TO_MINERALOCORTICOID	GO_RESPONSE_TO_MINERALOCORTICOID		31	0.446935	1.10603	0.30572	0.447495	1	1952	tags=26%, list=11%, signal=29%
GO_EMBRYONIC_HEART_TUBE_MORPHOGENESIS	GO_EMBRYONIC_HEART_TUBE_MORPHOGENESIS		57	0.334501	1.10355	0.266917	0.450105	1	3853	tags=32%, list=22%, signal=41%
GO_REGULATION_OF_PHOSPHOLIPID_METABOLIC_PROCESS	GO_REGULATION_OF_PHOSPHOLIPID_METABOLIC_PROCESS		55	0.374994	1.10361	0.279835	0.45029	1	2342	tags=25%, list=14%, signal=29%
GO_POSITIVE_REGULATION_OF_KIDNEY_DEVELOPMENT	GO_POSITIVE_REGULATION_OF_KIDNEY_DEVELOPMENT		40	0.429029	1.10364	0.290581	0.450528	1	1703	tags=28%, list=10%, signal=30%
GO_CELLULAR_SENESCENCE	GO_CELLULAR_SENESCENCE		29	0.374715	1.10412	0.295409	0.450556	1	5267	tags=59%, list=31%, signal=84%
GO_CELLULAR_RESPONSE_TO_STEROID_HORMONE_STIMULUS	GO_CELLULAR_RESPONSE_TO_STEROID_HORMONE_STIMULUS		204	0.303435	1.10372	0.196078	0.450673	1	2199	tags=16%, list=13%, signal=18%
GO_CELL_CELL_JUNCTION_ASSEMBLY	GO_CELL_CELL_JUNCTION_ASSEMBLY		69	0.342904	1.10386	0.294845	0.45071	1	3095	tags=26%, list=18%, signal=32%
GO_REGULATION_OF_TRANSCRIPTION_FROM_RNA_POLYMERASE_II_PROMOTER_IN_RESPONSE_TO_HYPOXIA	GO_REGULATION_OF_TRANSCRIPTION_FROM_RNA_POLYMERASE_II_PROMOTER_IN_RESPONSE_TO_HYPOXIA		28	0.397937	1.10259	0.308943	0.45154	1	1647	tags=21%, list=10%, signal=24%
GO_EMBRYONIC_CRANIAL_SKELETON_MORPHOGENESIS	GO_EMBRYONIC_CRANIAL_SKELETON_MORPHOGENESIS		46	0.383934	1.10242	0.311663	0.451546	1	2402	tags=22%, list=14%, signal=25%
GO_CELLULAR_RESPONSE_TO_INSULIN_STIMULUS	GO_CELLULAR_RESPONSE_TO_INSULIN_STIMULUS		138	0.270263	1.10163	0.240741	0.452663	1	3481	tags=25%, list=20%, signal=31%
GO_NEGATIVE_REGULATION_OF_PLATELET_ACTIVATION	GO_NEGATIVE_REGULATION_OF_PLATELET_ACTIVATION		17	0.467918	1.10129	0.31746	0.452957	1	1050	tags=24%, list=6%, signal=25%
GO_REGULATION_OF_MITOCHONDRIAL_MEMBRANE_POTENTIAL	GO_REGULATION_OF_MITOCHONDRIAL_MEMBRANE_POTENTIAL		49	0.379468	1.10103	0.280303	0.453127	1	2619	tags=29%, list=15%, signal=34%
GO_REGULATION_OF_VIRAL_TRANSCRIPTION	GO_REGULATION_OF_VIRAL_TRANSCRIPTION		56	0.30127	1.10067	0.316092	0.453165	1	1639	tags=14%, list=10%, signal=16%
GO_NEGATIVE_REGULATION_OF_AUTOPHAGY	GO_NEGATIVE_REGULATION_OF_AUTOPHAGY		50	0.337059	1.1008	0.298597	0.453239	1	4121	tags=38%, list=24%, signal=50%
GO_NEURAL_TUBE_DEVELOPMENT	GO_NEURAL_TUBE_DEVELOPMENT		140	0.33336	1.10023	0.279116	0.453626	1	3556	tags=31%, list=21%, signal=38%
GO_REGULATION_OF_CALCIUM_ION_IMPORT	GO_REGULATION_OF_CALCIUM_ION_IMPORT		91	0.351165	1.09982	0.300601	0.453758	1	2204	tags=20%, list=13%, signal=23%
GO_REGULATION_OF_TRANSCRIPTION_FROM_RNA_POLYMERASE_III_PROMOTER	GO_REGULATION_OF_TRANSCRIPTION_FROM_RNA_POLYMERASE_III_PROMOTER		19	0.36553	1.09984	0.346076	0.454007	1	2358	tags=21%, list=14%, signal=24%
GO_POSITIVE_REGULATION_OF_CAMP_METABOLIC_PROCESS	GO_POSITIVE_REGULATION_OF_CAMP_METABOLIC_PROCESS		84	0.343775	1.09908	0.269777	0.45421	1	1704	tags=14%, list=10%, signal=16%
GO_NEGATIVE_REGULATION_OF_TRANSPORT	GO_NEGATIVE_REGULATION_OF_TRANSPORT		427	0.299672	1.09869	0.239264	0.4543	1	2929	tags=23%, list=17%, signal=27%
GO_MITOCHONDRIAL_MEMBRANE_ORGANIZATION	GO_MITOCHONDRIAL_MEMBRANE_ORGANIZATION		86	0.283982	1.09884	0.305835	0.454327	1	3354	tags=20%, list=19%, signal=24%
GO_POSITIVE_REGULATION_OF_OSSIFICATION	GO_POSITIVE_REGULATION_OF_OSSIFICATION		80	0.403313	1.09934	0.270751	0.454333	1	2474	tags=31%, list=14%, signal=36%
GO_POSITIVE_REGULATION_OF_ENDOTHELIAL_CELL_PROLIFERATION	GO_POSITIVE_REGULATION_OF_ENDOTHELIAL_CELL_PROLIFERATION		65	0.40234	1.09914	0.293651	0.454402	1	1771	tags=25%, list=10%, signal=27%
GO_LIPOPROTEIN_BIOSYNTHETIC_PROCESS	GO_LIPOPROTEIN_BIOSYNTHETIC_PROCESS		81	0.287334	1.0979	0.313253	0.455345	1	3779	tags=28%, list=22%, signal=36%
GO_MACROMITOPHAGY	GO_MACROMITOPHAGY		124	0.293316	1.09772	0.228175	0.455358	1	1933	tags=16%, list=11%, signal=18%
GO_MAMMARY_GLAND_EPITHELIUM_DEVELOPMENT	GO_MAMMARY_GLAND_EPITHELIUM_DEVELOPMENT		51	0.349391	1.09753	0.305389	0.455432	1	3365	tags=29%, list=20%, signal=36%
GO_FATTY_ACID_BETA_OXIDATION_USING_ACYL_COA_DEHYDROGENASE	GO_FATTY_ACID_BETA_OXIDATION_USING_ACYL_COA_DEHYDROGENASE		18	0.413632	1.09663	0.357285	0.456435	1	4448	tags=44%, list=26%, signal=60%
GO_POSITIVE_REGULATION_OF_EPITHELIAL_TO_MESENCHYMAL_TRANSITION	GO_POSITIVE_REGULATION_OF_EPITHELIAL_TO_MESENCHYMAL_TRANSITION		32	0.426761	1.0967	0.289377	0.456569	1	2357	tags=34%, list=14%, signal=40%
GO_PROTEIN_LOCALIZATION_TO_CILIUM	GO_PROTEIN_LOCALIZATION_TO_CILIUM		22	0.378105	1.09609	0.326296	0.456755	1	5234	tags=50%, list=30%, signal=72%
GO_REGULATION_OF_INTRINSIC_APOPTOTIC_SIGNALING_PATHWAY_IN_RESPONSE_TO_DNA_DAMAGE	GO_REGULATION_OF_INTRINSIC_APOPTOTIC_SIGNALING_PATHWAY_IN_RESPONSE_TO_DNA_DAMAGE		31	0.382373	1.0959	0.346	0.456791	1	2516	tags=26%, list=15%, signal=30%
GO_NEGATIVE_REGULATION_OF_LIPID_CATABOLIC_PROCESS	GO_NEGATIVE_REGULATION_OF_LIPID_CATABOLIC_PROCESS		18	0.44104	1.09613	0.344969	0.456957	1	3662	tags=39%, list=21%, signal=49%
GO_RESPONSE_TO_TUMOR_NECROSIS_FACTOR	GO_RESPONSE_TO_TUMOR_NECROSIS_FACTOR		210	0.553654	1.70155	0	0.458205	0.925	2716	tags=30%, list=16%, signal=36%
GO_MISMATCH_REPAIR	GO_MISMATCH_REPAIR		26	0.440499	1.09486	0.403475	0.458276	1	5458	tags=50%, list=32%, signal=73%
GO_CELLULAR_RESPONSE_TO_UV	GO_CELLULAR_RESPONSE_TO_UV		63	0.375009	1.09367	0.328713	0.459774	1	3444	tags=32%, list=20%, signal=40%
GO_POSITIVE_REGULATION_OF_INTERLEUKIN_1_SECRETION	GO_POSITIVE_REGULATION_OF_INTERLEUKIN_1_SECRETION		21	0.479298	1.09348	0.350394	0.459836	1	2923	tags=38%, list=17%, signal=46%
GO_PROTEIN_FOLDING	GO_PROTEIN_FOLDING		197	0.278211	1.09377	0.309478	0.459861	1	4635	tags=40%, list=27%, signal=54%
GO_POSITIVE_REGULATION_OF_MYOBLAST_DIFFERENTIATION	GO_POSITIVE_REGULATION_OF_MYOBLAST_DIFFERENTIATION		22	0.376054	1.09305	0.339545	0.460338	1	2550	tags=23%, list=15%, signal=27%
GO_SKIN_EPIDERMIS_DEVELOPMENT	GO_SKIN_EPIDERMIS_DEVELOPMENT		67	0.355821	1.09282	0.290944	0.460453	1	3642	tags=30%, list=21%, signal=38%
GO_POSITIVE_REGULATION_OF_CELL_CYCLE_G1_S_PHASE_TRANSITION	GO_POSITIVE_REGULATION_OF_CELL_CYCLE_G1_S_PHASE_TRANSITION		28	0.423177	1.09253	0.327968	0.460667	1	2277	tags=25%, list=13%, signal=29%
GO_POSITIVE_REGULATION_OF_RELEASE_OF_SEQUESTERED_CALCIUM_ION_INTO_CYTOSOL	GO_POSITIVE_REGULATION_OF_RELEASE_OF_SEQUESTERED_CALCIUM_ION_INTO_CYTOSOL		34	0.384099	1.09222	0.361702	0.460911	1	1643	tags=12%, list=10%, signal=13%
GO_REGULATION_OF_PROTEIN_UBIQUITINATION_INVOLVED_IN_UBIQUITIN_DEPENDENT_PROTEIN_CATABOLIC_PROCESS	GO_REGULATION_OF_PROTEIN_UBIQUITINATION_INVOLVED_IN_UBIQUITIN_DEPENDENT_PROTEIN_CATABOLIC_PROCESS		95	0.332498	1.09057	0.398844	0.463434	1	3569	tags=22%, list=21%, signal=28%
GO_NEGATIVE_REGULATION_OF_ERBB_SIGNALING_PATHWAY	GO_NEGATIVE_REGULATION_OF_ERBB_SIGNALING_PATHWAY		42	0.328893	1.08982	0.310139	0.463899	1	661	tags=12%, list=4%, signal=12%
GO_NEGATIVE_REGULATION_OF_GROWTH	GO_NEGATIVE_REGULATION_OF_GROWTH		224	0.292964	1.08962	0.249493	0.463949	1	3756	tags=29%, list=22%, signal=37%
GO_NEGATIVE_REGULATION_OF_PROTEIN_BINDING	GO_NEGATIVE_REGULATION_OF_PROTEIN_BINDING		75	0.334271	1.09005	0.303748	0.464069	1	3635	tags=37%, list=21%, signal=47%
GO_NEGATIVE_REGULATION_OF_ENDOCYTOSIS	GO_NEGATIVE_REGULATION_OF_ENDOCYTOSIS		36	0.352543	1.08986	0.327869	0.464119	1	3151	tags=31%, list=18%, signal=37%
GO_TRANSMEMBRANE_RECEPTOR_PROTEIN_SERINE_THREONINE_KINASE_SIGNALING_PATHWAY	GO_TRANSMEMBRANE_RECEPTOR_PROTEIN_SERINE_THREONINE_KINASE_SIGNALING_PATHWAY		177	0.314761	1.08873	0.283168	0.464311	1	1493	tags=18%, list=9%, signal=19%
GO_POSITIVE_REGULATION_OF_EPIDERMIS_DEVELOPMENT	GO_POSITIVE_REGULATION_OF_EPIDERMIS_DEVELOPMENT		27	0.423587	1.08881	0.34104	0.464473	1	3251	tags=30%, list=19%, signal=36%
GO_TRABECULA_FORMATION	GO_TRABECULA_FORMATION		23	0.463833	1.08886	0.312245	0.464676	1	3698	tags=39%, list=21%, signal=50%
GO_SMALL_GTPASE_MEDIATED_SIGNAL_TRANSDUCTION	GO_SMALL_GTPASE_MEDIATED_SIGNAL_TRANSDUCTION		320	0.280959	1.08822	0.246988	0.464682	1	3151	tags=26%, list=18%, signal=31%
GO_REGULATION_OF_CELLULAR_EXTRAVASATION	GO_REGULATION_OF_CELLULAR_EXTRAVASATION		22	0.478962	1.08835	0.342685	0.464731	1	2202	tags=32%, list=13%, signal=36%
GO_REGULATION_OF_MEIOTIC_NUCLEAR_DIVISION	GO_REGULATION_OF_MEIOTIC_NUCLEAR_DIVISION		28	0.378904	1.08887	0.320158	0.464945	1	2264	tags=21%, list=13%, signal=25%
GO_SKELETAL_SYSTEM_MORPHOGENESIS	GO_SKELETAL_SYSTEM_MORPHOGENESIS		189	0.358317	1.08665	0.324111	0.466536	1	3499	tags=33%, list=20%, signal=41%
GO_CELL_VOLUME_HOMEOSTASIS	GO_CELL_VOLUME_HOMEOSTASIS		26	0.394853	1.08688	0.329293	0.466721	1	1474	tags=23%, list=9%, signal=25%
GO_NEGATIVE_REGULATION_OF_OSSIFICATION	GO_NEGATIVE_REGULATION_OF_OSSIFICATION		57	0.357799	1.08668	0.271605	0.466782	1	1464	tags=21%, list=9%, signal=23%
GO_POSITIVE_REGULATION_OF_DEPHOSPHORYLATION	GO_POSITIVE_REGULATION_OF_DEPHOSPHORYLATION		42	0.37897	1.08566	0.338205	0.467983	1	1940	tags=26%, list=11%, signal=29%
GO_RELAXATION_OF_MUSCLE	GO_RELAXATION_OF_MUSCLE		18	0.470161	1.08467	0.335984	0.469421	1	2547	tags=44%, list=15%, signal=52%
GO_CYTOKINE_METABOLIC_PROCESS	GO_CYTOKINE_METABOLIC_PROCESS		17	0.75882	1.70303	0	0.470911	0.92	2598	tags=41%, list=15%, signal=48%
GO_CALCIUM_MEDIATED_SIGNALING	GO_CALCIUM_MEDIATED_SIGNALING		78	0.359221	1.0834	0.335317	0.471012	1	3678	tags=33%, list=21%, signal=42%
GO_RESPONSE_TO_PROSTAGLANDIN_E	GO_RESPONSE_TO_PROSTAGLANDIN_E		25	0.393526	1.08355	0.335354	0.471043	1	1019	tags=16%, list=6%, signal=17%
GO_CARDIOCYTE_DIFFERENTIATION	GO_CARDIOCYTE_DIFFERENTIATION		89	0.34853	1.08312	0.321862	0.471182	1	2464	tags=21%, list=14%, signal=25%
GO_SIGNAL_TRANSDUCTION_BY_P53_CLASS_MEDIATOR	GO_SIGNAL_TRANSDUCTION_BY_P53_CLASS_MEDIATOR		119	0.340908	1.08262	0.339181	0.471788	1	2592	tags=22%, list=15%, signal=26%
GO_POSITIVE_REGULATION_OF_CALCIUM_ION_TRANSPORT	GO_POSITIVE_REGULATION_OF_CALCIUM_ION_TRANSPORT		96	0.345301	1.08171	0.319838	0.472734	1	2091	tags=18%, list=12%, signal=20%
GO_REGULATION_OF_STEM_CELL_PROLIFERATION	GO_REGULATION_OF_STEM_CELL_PROLIFERATION		84	0.365817	1.08172	0.305118	0.473008	1	4107	tags=40%, list=24%, signal=53%
GO_ENERGY_DERIVATION_BY_OXIDATION_OF_ORGANIC_COMPOUNDS	GO_ENERGY_DERIVATION_BY_OXIDATION_OF_ORGANIC_COMPOUNDS		203	0.256075	1.08122	0.3286	0.473301	1	4473	tags=29%, list=26%, signal=39%
GO_PEPTIDE_HORMONE_PROCESSING	GO_PEPTIDE_HORMONE_PROCESSING		30	0.411742	1.081	0.332649	0.473381	1	2179	tags=20%, list=13%, signal=23%
GO_NEGATIVE_REGULATION_OF_CATABOLIC_PROCESS	GO_NEGATIVE_REGULATION_OF_CATABOLIC_PROCESS		188	0.263191	1.0806	0.298	0.473789	1	3698	tags=23%, list=21%, signal=29%
GO_ENDOTHELIUM_DEVELOPMENT	GO_ENDOTHELIUM_DEVELOPMENT		87	0.357739	1.08015	0.345029	0.474254	1	2184	tags=26%, list=13%, signal=30%
GO_REGULATION_OF_NITRIC_OXIDE_SYNTHASE_ACTIVITY	GO_REGULATION_OF_NITRIC_OXIDE_SYNTHASE_ACTIVITY		47	0.345346	1.07923	0.337302	0.474718	1	4108	tags=32%, list=24%, signal=42%
GO_CORONARY_VASCULATURE_DEVELOPMENT	GO_CORONARY_VASCULATURE_DEVELOPMENT		35	0.378395	1.07905	0.342742	0.474755	1	967	tags=14%, list=6%, signal=15%
GO_HEMATOPOIETIC_PROGENITOR_CELL_DIFFERENTIATION	GO_HEMATOPOIETIC_PROGENITOR_CELL_DIFFERENTIATION		91	0.299308	1.07966	0.328032	0.474814	1	2848	tags=24%, list=17%, signal=29%
GO_REGULATION_OF_ORGAN_FORMATION	GO_REGULATION_OF_ORGAN_FORMATION		30	0.41997	1.07949	0.279167	0.474816	1	1737	tags=27%, list=10%, signal=30%
GO_STEROL_HOMEOSTASIS	GO_STEROL_HOMEOSTASIS		55	0.347485	1.07924	0.31405	0.474982	1	3041	tags=24%, list=18%, signal=29%
GO_NUCLEOBASE_CONTAINING_SMALL_MOLECULE_INTERCONVERSION	GO_NUCLEOBASE_CONTAINING_SMALL_MOLECULE_INTERCONVERSION		19	0.410571	1.07832	0.338552	0.475413	1	3064	tags=32%, list=18%, signal=38%
GO_NEGATIVE_REGULATION_OF_CELL_MATRIX_ADHESION	GO_NEGATIVE_REGULATION_OF_CELL_MATRIX_ADHESION		27	0.4406	1.07844	0.370143	0.475518	1	1665	tags=22%, list=10%, signal=25%
GO_NEGATIVE_REGULATION_OF_RESPONSE_TO_ENDOPLASMIC_RETICULUM_STRESS	GO_NEGATIVE_REGULATION_OF_RESPONSE_TO_ENDOPLASMIC_RETICULUM_STRESS		33	0.331843	1.07777	0.351406	0.476132	1	5511	tags=52%, list=32%, signal=76%
GO_REGULATION_OF_ESTABLISHMENT_OF_PROTEIN_LOCALIZATION_TO_MITOCHONDRION	GO_REGULATION_OF_ESTABLISHMENT_OF_PROTEIN_LOCALIZATION_TO_MITOCHONDRION		112	0.274238	1.07701	0.308911	0.477167	1	2955	tags=18%, list=17%, signal=21%
GO_NEURAL_TUBE_PATTERNING	GO_NEURAL_TUBE_PATTERNING		31	0.391017	1.07657	0.346228	0.477616	1	3521	tags=35%, list=20%, signal=45%
GO_REGULATION_OF_FATTY_ACID_TRANSPORT	GO_REGULATION_OF_FATTY_ACID_TRANSPORT		26	0.377303	1.07577	0.363458	0.477859	1	4183	tags=42%, list=24%, signal=56%
GO_PROTEIN_LOCALIZATION_TO_GOLGI_APPARATUS	GO_PROTEIN_LOCALIZATION_TO_GOLGI_APPARATUS		25	0.346983	1.07589	0.380855	0.477936	1	3528	tags=24%, list=21%, signal=30%
GO_LOCALIZATION_WITHIN_MEMBRANE	GO_LOCALIZATION_WITHIN_MEMBRANE		117	0.302437	1.07615	0.323471	0.47803	1	3546	tags=32%, list=21%, signal=41%
GO_NEGATIVE_REGULATION_OF_STEM_CELL_PROLIFERATION	GO_NEGATIVE_REGULATION_OF_STEM_CELL_PROLIFERATION		15	0.458852	1.07595	0.368852	0.478097	1	2285	tags=33%, list=13%, signal=38%
GO_RNA_PHOSPHODIESTER_BOND_HYDROLYSIS_ENDONUCLEOLYTIC	GO_RNA_PHOSPHODIESTER_BOND_HYDROLYSIS_ENDONUCLEOLYTIC		49	0.330045	1.07436	0.36166	0.47833	1	1682	tags=12%, list=10%, signal=14%
GO_NEGATIVE_REGULATION_OF_INTRINSIC_APOPTOTIC_SIGNALING_PATHWAY_IN_RESPONSE_TO_DNA_DAMAGE	GO_NEGATIVE_REGULATION_OF_INTRINSIC_APOPTOTIC_SIGNALING_PATHWAY_IN_RESPONSE_TO_DNA_DAMAGE		25	0.405934	1.07445	0.383534	0.478479	1	945	tags=20%, list=5%, signal=21%
GO_NEGATIVE_REGULATION_OF_T_CELL_APOPTOTIC_PROCESS	GO_NEGATIVE_REGULATION_OF_T_CELL_APOPTOTIC_PROCESS		16	0.460683	1.07455	0.363636	0.478601	1	1848	tags=19%, list=11%, signal=21%
GO_PHOSPHOLIPID_TRANSPORT	GO_PHOSPHOLIPID_TRANSPORT		51	0.334742	1.0747	0.33002	0.478627	1	2792	tags=24%, list=16%, signal=28%
GO_NEGATIVE_REGULATION_OF_CELL_AGING	GO_NEGATIVE_REGULATION_OF_CELL_AGING		16	0.449066	1.07491	0.386454	0.478839	1	1389	tags=19%, list=8%, signal=20%
GO_CATECHOLAMINE_METABOLIC_PROCESS	GO_CATECHOLAMINE_METABOLIC_PROCESS		38	0.402848	1.07506	0.323017	0.478844	1	1882	tags=16%, list=11%, signal=18%
GO_FATTY_ACYL_COA_METABOLIC_PROCESS	GO_FATTY_ACYL_COA_METABOLIC_PROCESS		44	0.365329	1.07471	0.321503	0.478904	1	3646	tags=36%, list=21%, signal=46%
GO_FOLIC_ACID_METABOLIC_PROCESS	GO_FOLIC_ACID_METABOLIC_PROCESS		16	0.401407	1.07359	0.352227	0.479397	1	2877	tags=25%, list=17%, signal=30%
GO_POSITIVE_REGULATION_OF_NEURAL_PRECURSOR_CELL_PROLIFERATION	GO_POSITIVE_REGULATION_OF_NEURAL_PRECURSOR_CELL_PROLIFERATION		38	0.429226	1.07309	0.312621	0.479702	1	2223	tags=29%, list=13%, signal=33%
GO_REGULATION_OF_PROTEIN_POLYMERIZATION	GO_REGULATION_OF_PROTEIN_POLYMERIZATION		157	0.296467	1.07317	0.334012	0.479848	1	3484	tags=32%, list=20%, signal=40%
GO_NUCLEOSIDE_SALVAGE	GO_NUCLEOSIDE_SALVAGE		16	0.416802	1.07257	0.367505	0.480291	1	917	tags=13%, list=5%, signal=13%
GO_SECRETION_BY_CELL	GO_SECRETION_BY_CELL		444	0.315771	1.0719	0.314453	0.481216	1	2486	tags=22%, list=14%, signal=25%
GO_NEGATIVE_REGULATION_OF_RESPONSE_TO_DNA_DAMAGE_STIMULUS	GO_NEGATIVE_REGULATION_OF_RESPONSE_TO_DNA_DAMAGE_STIMULUS		48	0.346893	1.07104	0.361277	0.481551	1	2516	tags=21%, list=15%, signal=24%
GO_AMEBOIDAL_TYPE_CELL_MIGRATION	GO_AMEBOIDAL_TYPE_CELL_MIGRATION		146	0.331816	1.07115	0.319672	0.481662	1	3083	tags=25%, list=18%, signal=31%
GO_VENTRICULAR_CARDIAC_MUSCLE_CELL_DIFFERENTIATION	GO_VENTRICULAR_CARDIAC_MUSCLE_CELL_DIFFERENTIATION		17	0.495292	1.07143	0.379576	0.481734	1	2464	tags=29%, list=14%, signal=34%
GO_REGULATION_OF_CELL_AGING	GO_REGULATION_OF_CELL_AGING		32	0.378154	1.07127	0.352475	0.481747	1	1389	tags=16%, list=8%, signal=17%
GO_MORPHOGENESIS_OF_EMBRYONIC_EPITHELIUM	GO_MORPHOGENESIS_OF_EMBRYONIC_EPITHELIUM		128	0.323406	1.07075	0.309055	0.481751	1	2376	tags=22%, list=14%, signal=25%
GO_GRANULOCYTE_DIFFERENTIATION	GO_GRANULOCYTE_DIFFERENTIATION		15	0.38605	1.07047	0.351504	0.481949	1	2767	tags=27%, list=16%, signal=32%
GO_GLYCOSPHINGOLIPID_METABOLIC_PROCESS	GO_GLYCOSPHINGOLIPID_METABOLIC_PROCESS		60	0.358253	1.06982	0.320641	0.482529	1	3103	tags=37%, list=18%, signal=45%
GO_MAST_CELL_MEDIATED_IMMUNITY	GO_MAST_CELL_MEDIATED_IMMUNITY		18	0.4699	1.06983	0.367308	0.482789	1	3046	tags=50%, list=18%, signal=61%
GO_EPHRIN_RECEPTOR_SIGNALING_PATHWAY	GO_EPHRIN_RECEPTOR_SIGNALING_PATHWAY		80	0.347271	1.0689	0.349206	0.483238	1	3210	tags=30%, list=19%, signal=37%
GO_LENS_FIBER_CELL_DIFFERENTIATION	GO_LENS_FIBER_CELL_DIFFERENTIATION		25	0.372654	1.06911	0.32844	0.483451	1	3616	tags=32%, list=21%, signal=40%
GO_REGULATION_OF_VESICLE_MEDIATED_TRANSPORT	GO_REGULATION_OF_VESICLE_MEDIATED_TRANSPORT		429	0.294301	1.06893	0.317526	0.483468	1	2332	tags=20%, list=14%, signal=22%
GO_REGULATION_OF_HYDROGEN_PEROXIDE_INDUCED_CELL_DEATH	GO_REGULATION_OF_HYDROGEN_PEROXIDE_INDUCED_CELL_DEATH		17	0.439576	1.06802	0.348697	0.484523	1	4282	tags=41%, list=25%, signal=55%
GO_POSITIVE_REGULATION_OF_VASOCONSTRICTION	GO_POSITIVE_REGULATION_OF_VASOCONSTRICTION	Details ...	35	0.734847	1.74522	0.00404858	0.484653	0.833	1311	tags=29%, list=8%, signal=31%
GO_REGULATION_OF_CYTOSKELETON_ORGANIZATION	GO_REGULATION_OF_CYTOSKELETON_ORGANIZATION		455	0.298164	1.06721	0.343811	0.485593	1	3235	tags=26%, list=19%, signal=31%
GO_MUSCLE_CELL_DIFFERENTIATION	GO_MUSCLE_CELL_DIFFERENTIATION		218	0.283959	1.06675	0.294355	0.485803	1	2530	tags=17%, list=15%, signal=20%
GO_MUSCLE_CELL_PROLIFERATION	GO_MUSCLE_CELL_PROLIFERATION		16	0.492941	1.06681	0.37051	0.48598	1	3652	tags=38%, list=21%, signal=48%
GO_PROTEOGLYCAN_METABOLIC_PROCESS	GO_PROTEOGLYCAN_METABOLIC_PROCESS		79	0.362064	1.06545	0.313131	0.487877	1	2627	tags=34%, list=15%, signal=40%
GO_REGULATION_OF_ERYTHROCYTE_DIFFERENTIATION	GO_REGULATION_OF_ERYTHROCYTE_DIFFERENTIATION		36	0.376173	1.06525	0.388031	0.487949	1	1852	tags=22%, list=11%, signal=25%
GO_NEGATIVE_REGULATION_OF_DEPHOSPHORYLATION	GO_NEGATIVE_REGULATION_OF_DEPHOSPHORYLATION		63	0.348143	1.06392	0.341317	0.489119	1	1421	tags=19%, list=8%, signal=21%
GO_REGULATION_OF_BIOMINERAL_TISSUE_DEVELOPMENT	GO_REGULATION_OF_BIOMINERAL_TISSUE_DEVELOPMENT		66	0.397288	1.06373	0.367793	0.489188	1	2474	tags=30%, list=14%, signal=35%
GO_NEGATIVE_REGULATION_OF_DNA_BIOSYNTHETIC_PROCESS	GO_NEGATIVE_REGULATION_OF_DNA_BIOSYNTHETIC_PROCESS		30	0.325632	1.06414	0.360324	0.489327	1	2571	tags=20%, list=15%, signal=23%
GO_ENDOTHELIAL_CELL_DIFFERENTIATION	GO_ENDOTHELIAL_CELL_DIFFERENTIATION		69	0.350456	1.06396	0.332689	0.489349	1	2075	tags=26%, list=12%, signal=30%
GO_EPIDERMAL_GROWTH_FACTOR_RECEPTOR_SIGNALING_PATHWAY	GO_EPIDERMAL_GROWTH_FACTOR_RECEPTOR_SIGNALING_PATHWAY		50	0.338373	1.0633	0.372984	0.489363	1	2682	tags=26%, list=16%, signal=31%
GO_ANATOMICAL_STRUCTURE_ARRANGEMENT	GO_ANATOMICAL_STRUCTURE_ARRANGEMENT		17	0.472048	1.06425	0.376494	0.48944	1	2984	tags=41%, list=17%, signal=50%
GO_RESPONSE_TO_X_RAY	GO_RESPONSE_TO_X_RAY		29	0.438377	1.06339	0.383268	0.489494	1	2708	tags=24%, list=16%, signal=29%
GO_CELLULAR_RESPONSE_TO_FATTY_ACID	GO_CELLULAR_RESPONSE_TO_FATTY_ACID		50	0.363818	1.06235	0.327451	0.490464	1	2202	tags=28%, list=13%, signal=32%
GO_NEGATIVE_REGULATION_OF_CELLULAR_CATABOLIC_PROCESS	GO_NEGATIVE_REGULATION_OF_CELLULAR_CATABOLIC_PROCESS		144	0.281651	1.06218	0.3286	0.49049	1	3698	tags=26%, list=21%, signal=32%
GO_POSITIVE_REGULATION_OF_PATHWAY_RESTRICTED_SMAD_PROTEIN_PHOSPHORYLATION	GO_POSITIVE_REGULATION_OF_PATHWAY_RESTRICTED_SMAD_PROTEIN_PHOSPHORYLATION		46	0.364264	1.06236	0.320158	0.490745	1	2357	tags=26%, list=14%, signal=30%
GO_BONE_CELL_DEVELOPMENT	GO_BONE_CELL_DEVELOPMENT		20	0.380045	1.0615	0.353635	0.491123	1	1363	tags=20%, list=8%, signal=22%
GO_RELEASE_OF_CYTOCHROME_C_FROM_MITOCHONDRIA	GO_RELEASE_OF_CYTOCHROME_C_FROM_MITOCHONDRIA		21	0.46111	1.06164	0.389734	0.491147	1	3768	tags=48%, list=22%, signal=61%
GO_CRANIAL_NERVE_DEVELOPMENT	GO_CRANIAL_NERVE_DEVELOPMENT		39	0.410803	1.06021	0.370079	0.491292	1	2174	tags=28%, list=13%, signal=32%
GO_REGULATION_OF_PROTEIN_DEACETYLATION	GO_REGULATION_OF_PROTEIN_DEACETYLATION		31	0.364461	1.06022	0.39501	0.491571	1	4041	tags=42%, list=23%, signal=55%
GO_ACTIN_NUCLEATION	GO_ACTIN_NUCLEATION		19	0.410964	1.06029	0.377907	0.491753	1	3142	tags=37%, list=18%, signal=45%
GO_REGULATION_OF_HAIR_CYCLE	GO_REGULATION_OF_HAIR_CYCLE		21	0.40624	1.06032	0.346535	0.491995	1	2646	tags=29%, list=15%, signal=34%
GO_POSITIVE_REGULATION_OF_MESENCHYMAL_CELL_PROLIFERATION	GO_POSITIVE_REGULATION_OF_MESENCHYMAL_CELL_PROLIFERATION		27	0.410952	1.06081	0.350305	0.492004	1	3365	tags=44%, list=20%, signal=55%
GO_PHOSPHATIDYLETHANOLAMINE_METABOLIC_PROCESS	GO_PHOSPHATIDYLETHANOLAMINE_METABOLIC_PROCESS		15	0.363336	1.05963	0.394737	0.492012	1	3876	tags=33%, list=23%, signal=43%
GO_CARDIAC_CHAMBER_DEVELOPMENT	GO_CARDIAC_CHAMBER_DEVELOPMENT		136	0.319701	1.06037	0.342052	0.492194	1	3708	tags=29%, list=22%, signal=36%
GO_FIBRINOLYSIS	GO_FIBRINOLYSIS		21	0.896632	1.70304	0	0.492316	0.92	309	tags=33%, list=2%, signal=34%
GO_NUCLEOTIDE_EXCISION_REPAIR_DNA_DUPLEX_UNWINDING	GO_NUCLEOTIDE_EXCISION_REPAIR_DNA_DUPLEX_UNWINDING		19	0.337412	1.06044	0.384774	0.492373	1	406	tags=5%, list=2%, signal=5%
GO_THIOESTER_BIOSYNTHETIC_PROCESS	GO_THIOESTER_BIOSYNTHETIC_PROCESS		46	0.347168	1.05921	0.363257	0.492441	1	3646	tags=33%, list=21%, signal=41%
GO_MODULATION_OF_GROWTH_OF_SYMBIONT_INVOLVED_IN_INTERACTION_WITH_HOST	GO_MODULATION_OF_GROWTH_OF_SYMBIONT_INVOLVED_IN_INTERACTION_WITH_HOST		16	0.416297	1.05884	0.409434	0.492852	1	4378	tags=38%, list=25%, signal=50%
GO_AXONEME_ASSEMBLY	GO_AXONEME_ASSEMBLY		32	0.467542	1.05778	0.434866	0.493303	1	4422	tags=41%, list=26%, signal=55%
GO_BENZENE_CONTAINING_COMPOUND_METABOLIC_PROCESS	GO_BENZENE_CONTAINING_COMPOUND_METABOLIC_PROCESS		17	0.432631	1.05789	0.369524	0.493373	1	1925	tags=29%, list=11%, signal=33%
GO_DIGESTIVE_SYSTEM_DEVELOPMENT	GO_DIGESTIVE_SYSTEM_DEVELOPMENT		138	0.33697	1.05821	0.316306	0.493412	1	2357	tags=20%, list=14%, signal=23%
GO_NEURAL_TUBE_FORMATION	GO_NEURAL_TUBE_FORMATION		89	0.334687	1.05838	0.348178	0.493413	1	2376	tags=22%, list=14%, signal=26%
GO_CELLULAR_RESPONSE_TO_PROSTAGLANDIN_E_STIMULUS	GO_CELLULAR_RESPONSE_TO_PROSTAGLANDIN_E_STIMULUS		18	0.430147	1.05802	0.373254	0.493422	1	2696	tags=33%, list=16%, signal=39%
GO_CARDIAC_SEPTUM_DEVELOPMENT	GO_CARDIAC_SEPTUM_DEVELOPMENT		80	0.337682	1.0573	0.336614	0.493887	1	3698	tags=34%, list=21%, signal=43%
GO_MEMBRANE_FUSION	GO_MEMBRANE_FUSION		130	0.296262	1.05613	0.339882	0.494866	1	2529	tags=21%, list=15%, signal=24%
GO_SMAD_PROTEIN_SIGNAL_TRANSDUCTION	GO_SMAD_PROTEIN_SIGNAL_TRANSDUCTION		52	0.368221	1.05623	0.356164	0.494968	1	2763	tags=31%, list=16%, signal=37%
GO_NEGATIVE_REGULATION_OF_STRIATED_MUSCLE_CELL_DIFFERENTIATION	GO_NEGATIVE_REGULATION_OF_STRIATED_MUSCLE_CELL_DIFFERENTIATION		21	0.400417	1.05652	0.364754	0.495024	1	3041	tags=43%, list=18%, signal=52%
GO_MELANOCYTE_DIFFERENTIATION	GO_MELANOCYTE_DIFFERENTIATION		17	0.469268	1.05623	0.362745	0.495233	1	1806	tags=29%, list=10%, signal=33%
GO_CELLULAR_ALDEHYDE_METABOLIC_PROCESS	GO_CELLULAR_ALDEHYDE_METABOLIC_PROCESS		78	0.308328	1.05543	0.355967	0.495814	1	2653	tags=21%, list=15%, signal=24%
GO_REGULATION_OF_ION_HOMEOSTASIS	GO_REGULATION_OF_ION_HOMEOSTASIS		189	0.308144	1.05527	0.33871	0.495828	1	2204	tags=21%, list=13%, signal=23%
GO_ARTERY_MORPHOGENESIS	GO_ARTERY_MORPHOGENESIS		50	0.397007	1.05509	0.365079	0.495855	1	3453	tags=40%, list=20%, signal=50%
GO_STRIATED_MUSCLE_CELL_DIFFERENTIATION	GO_STRIATED_MUSCLE_CELL_DIFFERENTIATION		158	0.282724	1.05477	0.318367	0.496145	1	2530	tags=17%, list=15%, signal=20%
GO_REGULATION_OF_GLYCOGEN_METABOLIC_PROCESS	GO_REGULATION_OF_GLYCOGEN_METABOLIC_PROCESS		31	0.357099	1.05295	0.39265	0.498466	1	4137	tags=39%, list=24%, signal=51%
GO_EMBRYONIC_DIGESTIVE_TRACT_DEVELOPMENT	GO_EMBRYONIC_DIGESTIVE_TRACT_DEVELOPMENT		32	0.424444	1.05305	0.365269	0.498575	1	1806	tags=22%, list=10%, signal=24%
GO_REGULATION_OF_CARTILAGE_DEVELOPMENT	GO_REGULATION_OF_CARTILAGE_DEVELOPMENT		53	0.371858	1.05307	0.356701	0.498825	1	2446	tags=28%, list=14%, signal=33%
GO_TRIVALENT_INORGANIC_CATION_TRANSPORT	GO_TRIVALENT_INORGANIC_CATION_TRANSPORT		38	0.361239	1.05216	0.369168	0.499629	1	984	tags=11%, list=6%, signal=11%
GO_ESTABLISHMENT_OF_ENDOTHELIAL_BARRIER	GO_ESTABLISHMENT_OF_ENDOTHELIAL_BARRIER		28	0.395144	1.05085	0.387164	0.500214	1	2075	tags=29%, list=12%, signal=32%
GO_BICELLULAR_TIGHT_JUNCTION_ASSEMBLY	GO_BICELLULAR_TIGHT_JUNCTION_ASSEMBLY		27	0.312084	1.05106	0.40873	0.500427	1	3328	tags=22%, list=19%, signal=28%
GO_PROTEIN_LOCALIZATION_TO_CYTOSKELETON	GO_PROTEIN_LOCALIZATION_TO_CYTOSKELETON		28	0.427499	1.05087	0.409091	0.500468	1	2240	tags=29%, list=13%, signal=33%
GO_RHYTHMIC_PROCESS	GO_RHYTHMIC_PROCESS		282	0.272211	1.05115	0.311637	0.500565	1	2743	tags=19%, list=16%, signal=22%
GO_REGULATION_OF_GENE_EXPRESSION_BY_GENETIC_IMPRINTING	GO_REGULATION_OF_GENE_EXPRESSION_BY_GENETIC_IMPRINTING		16	0.390937	1.05124	0.382129	0.500661	1	11	tags=6%, list=0%, signal=6%
GO_GAMETE_GENERATION	GO_GAMETE_GENERATION		492	0.219691	1.05138	0.327032	0.500721	1	4434	tags=26%, list=26%, signal=34%
GO_PROTEIN_LOCALIZATION_TO_VACUOLE	GO_PROTEIN_LOCALIZATION_TO_VACUOLE		42	0.309071	1.04978	0.379175	0.501155	1	3725	tags=24%, list=22%, signal=30%
GO_MONOCARBOXYLIC_ACID_CATABOLIC_PROCESS	GO_MONOCARBOXYLIC_ACID_CATABOLIC_PROCESS		91	0.317791	1.04986	0.387629	0.501316	1	3891	tags=33%, list=23%, signal=42%
GO_ISOPRENOID_BIOSYNTHETIC_PROCESS	GO_ISOPRENOID_BIOSYNTHETIC_PROCESS		22	0.407929	1.04997	0.373134	0.501408	1	595	tags=14%, list=3%, signal=14%
GO_REGULATION_OF_THE_FORCE_OF_HEART_CONTRACTION	GO_REGULATION_OF_THE_FORCE_OF_HEART_CONTRACTION		28	0.380745	1.0493	0.357285	0.501782	1	1891	tags=21%, list=11%, signal=24%
GO_REGULATION_OF_IMMUNOGLOBULIN_PRODUCTION	GO_REGULATION_OF_IMMUNOGLOBULIN_PRODUCTION	Details ...	45	0.590325	1.7484	0.00191205	0.502087	0.822	4593	tags=47%, list=27%, signal=64%
GO_REGULATION_OF_SEQUESTERING_OF_CALCIUM_ION	GO_REGULATION_OF_SEQUESTERING_OF_CALCIUM_ION		97	0.333919	1.04885	0.364729	0.502287	1	2529	tags=24%, list=15%, signal=28%
GO_POSITIVE_REGULATION_OF_PHOSPHOLIPID_METABOLIC_PROCESS	GO_POSITIVE_REGULATION_OF_PHOSPHOLIPID_METABOLIC_PROCESS		38	0.384769	1.04861	0.390244	0.50246	1	3128	tags=32%, list=18%, signal=39%
GO_REGULATION_OF_SYNCYTIUM_FORMATION_BY_PLASMA_MEMBRANE_FUSION	GO_REGULATION_OF_SYNCYTIUM_FORMATION_BY_PLASMA_MEMBRANE_FUSION		23	0.763598	1.70521	0.00392927	0.50291	0.913	2655	tags=52%, list=15%, signal=62%
GO_MICROTUBULE_BUNDLE_FORMATION	GO_MICROTUBULE_BUNDLE_FORMATION		53	0.381075	1.04807	0.40824	0.503092	1	2924	tags=26%, list=17%, signal=32%
GO_POSITIVE_REGULATION_OF_JUN_KINASE_ACTIVITY	GO_POSITIVE_REGULATION_OF_JUN_KINASE_ACTIVITY		60	0.30031	1.04721	0.389691	0.504265	1	3842	tags=28%, list=22%, signal=36%
GO_ESTABLISHMENT_OF_PROTEIN_LOCALIZATION_TO_PLASMA_MEMBRANE	GO_ESTABLISHMENT_OF_PROTEIN_LOCALIZATION_TO_PLASMA_MEMBRANE		84	0.319318	1.04703	0.389558	0.504295	1	2697	tags=21%, list=16%, signal=25%
GO_TETRAPYRROLE_BIOSYNTHETIC_PROCESS	GO_TETRAPYRROLE_BIOSYNTHETIC_PROCESS		26	0.324366	1.0464	0.4	0.504831	1	3977	tags=35%, list=23%, signal=45%
GO_COPULATION	GO_COPULATION		17	0.438099	1.04655	0.383505	0.504854	1	491	tags=12%, list=3%, signal=12%
GO_HEART_MORPHOGENESIS	GO_HEART_MORPHOGENESIS		199	0.316733	1.04604	0.341748	0.504872	1	3708	tags=32%, list=22%, signal=40%
GO_SOMATIC_DIVERSIFICATION_OF_IMMUNOGLOBULINS	GO_SOMATIC_DIVERSIFICATION_OF_IMMUNOGLOBULINS		25	0.347305	1.04617	0.404453	0.504923	1	5152	tags=32%, list=30%, signal=46%
GO_REGULATION_OF_RHO_PROTEIN_SIGNAL_TRANSDUCTION	GO_REGULATION_OF_RHO_PROTEIN_SIGNAL_TRANSDUCTION		99	0.302564	1.04577	0.343815	0.505047	1	3307	tags=25%, list=19%, signal=31%
GO_PHOSPHATIDYLCHOLINE_BIOSYNTHETIC_PROCESS	GO_PHOSPHATIDYLCHOLINE_BIOSYNTHETIC_PROCESS		25	0.357766	1.04467	0.388548	0.505835	1	3747	tags=32%, list=22%, signal=41%
GO_POSITIVE_REGULATION_OF_MITOTIC_NUCLEAR_DIVISION	GO_POSITIVE_REGULATION_OF_MITOTIC_NUCLEAR_DIVISION		46	0.414762	1.04496	0.418919	0.50589	1	4901	tags=41%, list=28%, signal=58%
GO_G_PROTEIN_COUPLED_RECEPTOR_SIGNALING_PATHWAY_COUPLED_TO_CYCLIC_NUCLEOTIDE_SECOND_MESSENGER	GO_G_PROTEIN_COUPLED_RECEPTOR_SIGNALING_PATHWAY_COUPLED_TO_CYCLIC_NUCLEOTIDE_SECOND_MESSENGER		158	0.305775	1.04507	0.36961	0.505977	1	2048	tags=13%, list=12%, signal=14%
GO_COLUMNAR_CUBOIDAL_EPITHELIAL_CELL_DEVELOPMENT	GO_COLUMNAR_CUBOIDAL_EPITHELIAL_CELL_DEVELOPMENT		44	0.337316	1.04467	0.372093	0.506122	1	2281	tags=25%, list=13%, signal=29%
GO_REGULATION_OF_CHOLESTEROL_EFFLUX	GO_REGULATION_OF_CHOLESTEROL_EFFLUX		20	0.388382	1.04417	0.414226	0.506408	1	2616	tags=25%, list=15%, signal=29%
GO_POSITIVE_REGULATION_OF_CELL_DIVISION	GO_POSITIVE_REGULATION_OF_CELL_DIVISION		120	0.367659	1.04368	0.411429	0.506713	1	2357	tags=20%, list=14%, signal=23%
GO_GOLGI_TO_VACUOLE_TRANSPORT	GO_GOLGI_TO_VACUOLE_TRANSPORT		23	0.350476	1.04369	0.400802	0.506988	1	3430	tags=30%, list=20%, signal=38%
GO_MUSCLE_CELL_CELLULAR_HOMEOSTASIS	GO_MUSCLE_CELL_CELLULAR_HOMEOSTASIS		17	0.443702	1.0426	0.389474	0.507993	1	2534	tags=29%, list=15%, signal=34%
GO_MESONEPHROS_DEVELOPMENT	GO_MESONEPHROS_DEVELOPMENT		87	0.336325	1.04271	0.370297	0.508086	1	2383	tags=23%, list=14%, signal=27%
GO_GAS_TRANSPORT	GO_GAS_TRANSPORT		16	0.477845	1.04193	0.44186	0.508881	1	747	tags=13%, list=4%, signal=13%
GO_MICROVILLUS_ORGANIZATION	GO_MICROVILLUS_ORGANIZATION		18	0.405395	1.04063	0.390593	0.510899	1	2075	tags=28%, list=12%, signal=32%
GO_REGULATION_OF_EXECUTION_PHASE_OF_APOPTOSIS	GO_REGULATION_OF_EXECUTION_PHASE_OF_APOPTOSIS		24	0.380525	1.04047	0.392354	0.510903	1	3518	tags=29%, list=20%, signal=37%
GO_POSITIVE_REGULATION_OF_CYCLIC_NUCLEOTIDE_METABOLIC_PROCESS	GO_POSITIVE_REGULATION_OF_CYCLIC_NUCLEOTIDE_METABOLIC_PROCESS		102	0.306513	1.04005	0.349901	0.511114	1	1737	tags=14%, list=10%, signal=15%
GO_ALPHA_AMINO_ACID_BIOSYNTHETIC_PROCESS	GO_ALPHA_AMINO_ACID_BIOSYNTHETIC_PROCESS		70	0.297067	1.04015	0.380081	0.511222	1	2904	tags=24%, list=17%, signal=29%
GO_REGULATION_OF_MEIOTIC_CELL_CYCLE	GO_REGULATION_OF_MEIOTIC_CELL_CYCLE		38	0.341934	1.03848	0.388889	0.513597	1	2264	tags=18%, list=13%, signal=21%
GO_REGULATION_OF_SYNAPTIC_TRANSMISSION_DOPAMINERGIC	GO_REGULATION_OF_SYNAPTIC_TRANSMISSION_DOPAMINERGIC		17	0.424959	1.03828	0.413655	0.513692	1	4416	tags=29%, list=26%, signal=40%
GO_ENDOMEMBRANE_SYSTEM_ORGANIZATION	GO_ENDOMEMBRANE_SYSTEM_ORGANIZATION		417	0.238192	1.0376	0.341365	0.513698	1	2697	tags=18%, list=16%, signal=21%
GO_PROTEIN_IMPORT_INTO_NUCLEUS_TRANSLOCATION	GO_PROTEIN_IMPORT_INTO_NUCLEUS_TRANSLOCATION		27	0.353999	1.03806	0.399577	0.513786	1	1515	tags=19%, list=9%, signal=20%
GO_POSITIVE_REGULATION_OF_STEM_CELL_PROLIFERATION	GO_POSITIVE_REGULATION_OF_STEM_CELL_PROLIFERATION		60	0.363832	1.0378	0.37721	0.513893	1	3518	tags=35%, list=20%, signal=44%
GO_CHONDROITIN_SULFATE_BIOSYNTHETIC_PROCESS	GO_CHONDROITIN_SULFATE_BIOSYNTHETIC_PROCESS		25	0.424356	1.03761	0.395582	0.513975	1	1838	tags=36%, list=11%, signal=40%
GO_REGULATION_OF_DNA_BIOSYNTHETIC_PROCESS	GO_REGULATION_OF_DNA_BIOSYNTHETIC_PROCESS		89	0.305752	1.03624	0.37451	0.515913	1	2645	tags=19%, list=15%, signal=22%
GO_AUTOPHAGOSOME_ORGANIZATION	GO_AUTOPHAGOSOME_ORGANIZATION		36	0.296083	1.03561	0.420842	0.516775	1	2266	tags=14%, list=13%, signal=16%
GO_ACETYL_COA_METABOLIC_PROCESS	GO_ACETYL_COA_METABOLIC_PROCESS		23	0.342532	1.0353	0.411523	0.517033	1	2660	tags=22%, list=15%, signal=26%
GO_ADHERENS_JUNCTION_ASSEMBLY	GO_ADHERENS_JUNCTION_ASSEMBLY		32	0.364696	1.03443	0.408333	0.517978	1	1874	tags=19%, list=11%, signal=21%
GO_TRABECULA_MORPHOGENESIS	GO_TRABECULA_MORPHOGENESIS		38	0.365303	1.03454	0.39501	0.51808	1	2464	tags=21%, list=14%, signal=25%
GO_ACTIN_FILAMENT_POLYMERIZATION	GO_ACTIN_FILAMENT_POLYMERIZATION		21	0.414956	1.03392	0.455426	0.518532	1	1908	tags=29%, list=11%, signal=32%
GO_REGULATION_OF_TYPE_I_INTERFERON_MEDIATED_SIGNALING_PATHWAY	GO_REGULATION_OF_TYPE_I_INTERFERON_MEDIATED_SIGNALING_PATHWAY	Details ...	31	0.560597	1.70719	0.00770713	0.518681	0.912	2233	tags=26%, list=13%, signal=30%
GO_REGULATION_OF_BEHAVIOR	GO_REGULATION_OF_BEHAVIOR		61	0.319543	1.03261	0.389328	0.520401	1	2059	tags=16%, list=12%, signal=19%
GO_REGULATION_OF_DNA_TEMPLATED_TRANSCRIPTION_INITIATION	GO_REGULATION_OF_DNA_TEMPLATED_TRANSCRIPTION_INITIATION		30	0.314689	1.03275	0.393411	0.520421	1	2970	tags=27%, list=17%, signal=32%
GO_PHOSPHATIDYLGLYCEROL_METABOLIC_PROCESS	GO_PHOSPHATIDYLGLYCEROL_METABOLIC_PROCESS	Details ...	28	0.599045	1.75282	0.00202429	0.52071	0.811	1560	tags=14%, list=9%, signal=16%
GO_ASTROCYTE_DEVELOPMENT	GO_ASTROCYTE_DEVELOPMENT		19	0.465381	1.03214	0.422932	0.520968	1	1389	tags=32%, list=8%, signal=34%
GO_REGULATION_OF_CELL_GROWTH	GO_REGULATION_OF_CELL_GROWTH		353	0.272086	1.03176	0.367432	0.521383	1	3756	tags=30%, list=22%, signal=37%
GO_CHONDROITIN_SULFATE_PROTEOGLYCAN_BIOSYNTHETIC_PROCESS	GO_CHONDROITIN_SULFATE_PROTEOGLYCAN_BIOSYNTHETIC_PROCESS		28	0.426547	1.03151	0.395161	0.5215	1	1838	tags=36%, list=11%, signal=40%
GO_RESPONSE_TO_XENOBIOTIC_STIMULUS	GO_RESPONSE_TO_XENOBIOTIC_STIMULUS		83	0.344107	1.03102	0.414938	0.522104	1	2447	tags=20%, list=14%, signal=24%
GO_POSITIVE_REGULATION_OF_EXTRINSIC_APOPTOTIC_SIGNALING_PATHWAY_VIA_DEATH_DOMAIN_RECEPTORS	GO_POSITIVE_REGULATION_OF_EXTRINSIC_APOPTOTIC_SIGNALING_PATHWAY_VIA_DEATH_DOMAIN_RECEPTORS		16	0.459457	1.0308	0.410546	0.522214	1	3905	tags=44%, list=23%, signal=57%
GO_PURINE_NUCLEOSIDE_BIOSYNTHETIC_PROCESS	GO_PURINE_NUCLEOSIDE_BIOSYNTHETIC_PROCESS		58	0.309612	1.02873	0.388119	0.525583	1	2913	tags=24%, list=17%, signal=29%
GO_STAT_CASCADE	GO_STAT_CASCADE	Details ...	47	0.682877	1.73162	0	0.526433	0.868	2379	tags=36%, list=14%, signal=42%
GO_S_ADENOSYLMETHIONINE_METABOLIC_PROCESS	GO_S_ADENOSYLMETHIONINE_METABOLIC_PROCESS		16	0.361353	1.0265	0.433538	0.527542	1	6307	tags=56%, list=37%, signal=89%
GO_PYRIMIDINE_NUCLEOTIDE_BIOSYNTHETIC_PROCESS	GO_PYRIMIDINE_NUCLEOTIDE_BIOSYNTHETIC_PROCESS		26	0.343903	1.0268	0.420233	0.527605	1	3064	tags=23%, list=18%, signal=28%
GO_SCHWANN_CELL_DEVELOPMENT	GO_SCHWANN_CELL_DEVELOPMENT		24	0.368013	1.02628	0.403689	0.527659	1	525	tags=13%, list=3%, signal=13%
GO_RESPONSE_TO_IMMOBILIZATION_STRESS	GO_RESPONSE_TO_IMMOBILIZATION_STRESS		21	0.397405	1.02658	0.417178	0.527687	1	2192	tags=24%, list=13%, signal=27%
GO_LABYRINTHINE_LAYER_BLOOD_VESSEL_DEVELOPMENT	GO_LABYRINTHINE_LAYER_BLOOD_VESSEL_DEVELOPMENT		15	0.404556	1.0272	0.423459	0.527743	1	931	tags=13%, list=5%, signal=14%
GO_REGULATION_OF_THYMOCYTE_AGGREGATION	GO_REGULATION_OF_THYMOCYTE_AGGREGATION		23	0.397963	1.02687	0.41502	0.527775	1	4109	tags=48%, list=24%, signal=63%
GO_DETECTION_OF_STIMULUS	GO_DETECTION_OF_STIMULUS		298	0.21646	1.02726	0.398039	0.527949	1	2645	tags=11%, list=15%, signal=12%
GO_CYCLIC_NUCLEOTIDE_BIOSYNTHETIC_PROCESS	GO_CYCLIC_NUCLEOTIDE_BIOSYNTHETIC_PROCESS		30	0.35239	1.02687	0.41129	0.528066	1	243	tags=7%, list=1%, signal=7%
GO_REGULATION_OF_CELL_DIVISION	GO_REGULATION_OF_CELL_DIVISION		250	0.349757	1.02559	0.444227	0.528319	1	2357	tags=19%, list=14%, signal=21%
GO_NEGATIVE_REGULATION_OF_PROTEIN_MODIFICATION_BY_SMALL_PROTEIN_CONJUGATION_OR_REMOVAL	GO_NEGATIVE_REGULATION_OF_PROTEIN_MODIFICATION_BY_SMALL_PROTEIN_CONJUGATION_OR_REMOVAL		126	0.293022	1.02574	0.432749	0.528372	1	2592	tags=17%, list=15%, signal=20%
GO_REGULATION_OF_PROTEIN_BINDING	GO_REGULATION_OF_PROTEIN_BINDING		160	0.276071	1.02518	0.382766	0.5288	1	3635	tags=31%, list=21%, signal=38%
GO_ACUTE_INFLAMMATORY_RESPONSE	GO_ACUTE_INFLAMMATORY_RESPONSE	Details ...	70	0.705526	1.70985	0	0.529755	0.912	1570	tags=31%, list=9%, signal=34%
GO_FEMALE_SEX_DIFFERENTIATION	GO_FEMALE_SEX_DIFFERENTIATION		113	0.307836	1.02356	0.393762	0.531318	1	3332	tags=26%, list=19%, signal=32%
GO_EMBRYONIC_HEART_TUBE_DEVELOPMENT	GO_EMBRYONIC_HEART_TUBE_DEVELOPMENT		67	0.309793	1.02288	0.412668	0.532263	1	3674	tags=33%, list=21%, signal=42%
GO_POSITIVE_REGULATION_OF_VIRAL_GENOME_REPLICATION	GO_POSITIVE_REGULATION_OF_VIRAL_GENOME_REPLICATION		27	0.350674	1.02207	0.423828	0.532283	1	3257	tags=26%, list=19%, signal=32%
GO_NEGATIVE_REGULATION_OF_NEURON_APOPTOTIC_PROCESS	GO_NEGATIVE_REGULATION_OF_NEURON_APOPTOTIC_PROCESS		124	0.314382	1.02237	0.384774	0.532345	1	2529	tags=23%, list=15%, signal=27%
GO_REGULATION_OF_RECEPTOR_MEDIATED_ENDOCYTOSIS	GO_REGULATION_OF_RECEPTOR_MEDIATED_ENDOCYTOSIS		77	0.330844	1.02243	0.414163	0.53251	1	1666	tags=18%, list=10%, signal=20%
GO_CILIUM_MORPHOGENESIS	GO_CILIUM_MORPHOGENESIS		170	0.324197	1.02207	0.435849	0.532558	1	4422	tags=37%, list=26%, signal=49%
GO_REGULATION_OF_DEFENSE_RESPONSE_TO_VIRUS_BY_VIRUS	GO_REGULATION_OF_DEFENSE_RESPONSE_TO_VIRUS_BY_VIRUS		29	0.351508	1.0225	0.422222	0.532681	1	2724	tags=24%, list=16%, signal=29%
GO_HEME_BIOSYNTHETIC_PROCESS	GO_HEME_BIOSYNTHETIC_PROCESS		19	0.336141	1.02148	0.407115	0.533044	1	3977	tags=37%, list=23%, signal=48%
GO_RNA_PHOSPHODIESTER_BOND_HYDROLYSIS	GO_RNA_PHOSPHODIESTER_BOND_HYDROLYSIS		101	0.28227	1.02129	0.417969	0.533096	1	1682	tags=11%, list=10%, signal=12%
GO_NEPHRON_DEVELOPMENT	GO_NEPHRON_DEVELOPMENT		110	0.345993	1.02089	0.386588	0.533536	1	2383	tags=28%, list=14%, signal=33%
GO_SPROUTING_ANGIOGENESIS	GO_SPROUTING_ANGIOGENESIS		40	0.405723	1.02038	0.412826	0.534137	1	4109	tags=48%, list=24%, signal=62%
GO_DNA_CATABOLIC_PROCESS	GO_DNA_CATABOLIC_PROCESS		24	0.33153	1.01967	0.434535	0.535077	1	2155	tags=17%, list=13%, signal=19%
GO_KIDNEY_EPITHELIUM_DEVELOPMENT	GO_KIDNEY_EPITHELIUM_DEVELOPMENT		121	0.323336	1.01882	0.411765	0.536389	1	2383	tags=23%, list=14%, signal=27%
GO_CELLULAR_RESPONSE_TO_TOXIC_SUBSTANCE	GO_CELLULAR_RESPONSE_TO_TOXIC_SUBSTANCE		24	0.370497	1.01814	0.414141	0.537316	1	1891	tags=33%, list=11%, signal=37%
GO_ERBB_SIGNALING_PATHWAY	GO_ERBB_SIGNALING_PATHWAY		72	0.286877	1.01687	0.431212	0.53932	1	2452	tags=19%, list=14%, signal=23%
GO_NUCLEOSIDE_TRIPHOSPHATE_BIOSYNTHETIC_PROCESS	GO_NUCLEOSIDE_TRIPHOSPHATE_BIOSYNTHETIC_PROCESS		35	0.322304	1.01563	0.414729	0.54103	1	3064	tags=26%, list=18%, signal=31%
GO_POSITIVE_REGULATION_OF_CELL_KILLING	GO_POSITIVE_REGULATION_OF_CELL_KILLING		37	0.32694	1.01568	0.44358	0.541214	1	3992	tags=32%, list=23%, signal=42%
GO_EYE_DEVELOPMENT	GO_EYE_DEVELOPMENT		310	0.272159	1.01525	0.430799	0.541404	1	3522	tags=27%, list=20%, signal=34%
GO_RESPONSE_TO_NICOTINE	GO_RESPONSE_TO_NICOTINE		50	0.316679	1.01502	0.423625	0.541528	1	2155	tags=14%, list=13%, signal=16%
GO_POST_EMBRYONIC_DEVELOPMENT	GO_POST_EMBRYONIC_DEVELOPMENT		82	0.282664	1.01289	0.419422	0.545177	1	3484	tags=34%, list=20%, signal=43%
GO_REGULATION_OF_HEART_MORPHOGENESIS	GO_REGULATION_OF_HEART_MORPHOGENESIS		27	0.411868	1.0125	0.402299	0.545307	1	706	tags=22%, list=4%, signal=23%
GO_BONE_MINERALIZATION	GO_BONE_MINERALIZATION		36	0.382405	1.01256	0.415058	0.545494	1	2056	tags=25%, list=12%, signal=28%
GO_ACTIN_FILAMENT_ORGANIZATION	GO_ACTIN_FILAMENT_ORGANIZATION		156	0.281453	1.01213	0.413519	0.545663	1	3142	tags=24%, list=18%, signal=30%
GO_REGULATION_OF_CGMP_METABOLIC_PROCESS	GO_REGULATION_OF_CGMP_METABOLIC_PROCESS		27	0.367493	1.01184	0.43125	0.545891	1	1737	tags=19%, list=10%, signal=21%
GO_POSITIVE_REGULATION_OF_STEM_CELL_DIFFERENTIATION	GO_POSITIVE_REGULATION_OF_STEM_CELL_DIFFERENTIATION		47	0.37505	1.0112	0.418994	0.546736	1	3420	tags=38%, list=20%, signal=48%
GO_HYDROGEN_TRANSPORT	GO_HYDROGEN_TRANSPORT		107	0.248701	1.01073	0.414	0.547248	1	3068	tags=19%, list=18%, signal=23%
GO_MAMMARY_GLAND_DUCT_MORPHOGENESIS	GO_MAMMARY_GLAND_DUCT_MORPHOGENESIS		27	0.348877	1.01051	0.413726	0.547348	1	3218	tags=30%, list=19%, signal=36%
GO_CARBOHYDRATE_CATABOLIC_PROCESS	GO_CARBOHYDRATE_CATABOLIC_PROCESS	Details ...	104	0.531311	1.71159	0.00397614	0.547477	0.91	3059	tags=37%, list=18%, signal=44%
GO_CARBOHYDRATE_DERIVATIVE_TRANSPORT	GO_CARBOHYDRATE_DERIVATIVE_TRANSPORT	Details ...	48	0.515608	1.71742	0.00594059	0.547692	0.9	4036	tags=38%, list=23%, signal=49%
GO_REGULATION_OF_CYCLIN_DEPENDENT_PROTEIN_KINASE_ACTIVITY	GO_REGULATION_OF_CYCLIN_DEPENDENT_PROTEIN_KINASE_ACTIVITY		87	0.34619	1.01014	0.436	0.547709	1	2155	tags=23%, list=13%, signal=26%
GO_REGULATION_OF_CELLULAR_SENESCENCE	GO_REGULATION_OF_CELLULAR_SENESCENCE		26	0.364343	1.00997	0.441352	0.547732	1	1389	tags=15%, list=8%, signal=17%
GO_NOTOCHORD_DEVELOPMENT	GO_NOTOCHORD_DEVELOPMENT		16	0.434581	1.00976	0.418251	0.547814	1	2424	tags=38%, list=14%, signal=44%
GO_REGULATION_OF_CALCIUM_ION_TRANSPORT	GO_REGULATION_OF_CALCIUM_ION_TRANSPORT		192	0.313105	1.00896	0.433198	0.54907	1	2091	tags=19%, list=12%, signal=21%
GO_FAT_CELL_DIFFERENTIATION	GO_FAT_CELL_DIFFERENTIATION		98	0.313583	1.00859	0.414487	0.549458	1	2648	tags=23%, list=15%, signal=28%
GO_BRANCHING_INVOLVED_IN_URETERIC_BUD_MORPHOGENESIS	GO_BRANCHING_INVOLVED_IN_URETERIC_BUD_MORPHOGENESIS		42	0.355478	1.00753	0.446316	0.551139	1	2322	tags=29%, list=13%, signal=33%
GO_CELL_DEATH_IN_RESPONSE_TO_OXIDATIVE_STRESS	GO_CELL_DEATH_IN_RESPONSE_TO_OXIDATIVE_STRESS		18	0.392526	1.00652	0.442688	0.552615	1	2438	tags=33%, list=14%, signal=39%
GO_NEGATIVE_REGULATION_OF_MUSCLE_CELL_APOPTOTIC_PROCESS	GO_NEGATIVE_REGULATION_OF_MUSCLE_CELL_APOPTOTIC_PROCESS		29	0.366553	1.00589	0.455852	0.553246	1	2464	tags=24%, list=14%, signal=28%
GO_RESPONSE_TO_TESTOSTERONE	GO_RESPONSE_TO_TESTOSTERONE		37	0.326103	1.00597	0.431373	0.553371	1	2171	tags=19%, list=13%, signal=22%
GO_PROTEIN_HOMOOLIGOMERIZATION	GO_PROTEIN_HOMOOLIGOMERIZATION		235	0.243887	1.00523	0.399573	0.553591	1	2877	tags=20%, list=17%, signal=24%
GO_SCHWANN_CELL_DIFFERENTIATION	GO_SCHWANN_CELL_DIFFERENTIATION		29	0.370352	1.0054	0.436364	0.553606	1	2968	tags=31%, list=17%, signal=37%
GO_NEGATIVE_REGULATION_OF_TISSUE_REMODELING	GO_NEGATIVE_REGULATION_OF_TISSUE_REMODELING		17	0.444112	1.0055	0.457143	0.553726	1	2885	tags=41%, list=17%, signal=49%
GO_APOPTOTIC_PROCESS_INVOLVED_IN_DEVELOPMENT	GO_APOPTOTIC_PROCESS_INVOLVED_IN_DEVELOPMENT		19	0.39523	1.00481	0.420202	0.554027	1	3616	tags=42%, list=21%, signal=53%
GO_ANION_TRANSPORT	GO_ANION_TRANSPORT		456	0.276592	1.0046	0.442553	0.55411	1	2901	tags=21%, list=17%, signal=25%
GO_POSITIVE_REGULATION_OF_VIRAL_RELEASE_FROM_HOST_CELL	GO_POSITIVE_REGULATION_OF_VIRAL_RELEASE_FROM_HOST_CELL		15	0.354998	1.00438	0.454365	0.554247	1	2203	tags=13%, list=13%, signal=15%
GO_REGULATION_OF_RNA_STABILITY	GO_REGULATION_OF_RNA_STABILITY		128	0.249147	1.00368	0.438224	0.554886	1	4089	tags=26%, list=24%, signal=34%
GO_REGULATION_OF_EPITHELIAL_CELL_DIFFERENTIATION	GO_REGULATION_OF_EPITHELIAL_CELL_DIFFERENTIATION		112	0.297524	1.00376	0.435993	0.555067	1	1464	tags=13%, list=9%, signal=15%
GO_RESPONSE_TO_PAIN	GO_RESPONSE_TO_PAIN		28	0.375422	1.00289	0.434698	0.555979	1	2875	tags=25%, list=17%, signal=30%
GO_REGULATION_OF_LIGASE_ACTIVITY	GO_REGULATION_OF_LIGASE_ACTIVITY		118	0.294671	1.00252	0.462121	0.556319	1	2970	tags=18%, list=17%, signal=21%
GO_AMMONIUM_TRANSMEMBRANE_TRANSPORT	GO_AMMONIUM_TRANSMEMBRANE_TRANSPORT		24	0.355165	1.00226	0.435644	0.556471	1	2660	tags=21%, list=15%, signal=25%
GO_IMPORT_INTO_CELL	GO_IMPORT_INTO_CELL		36	0.40856	1.00158	0.443775	0.557447	1	3191	tags=33%, list=19%, signal=41%
GO_DEPHOSPHORYLATION	GO_DEPHOSPHORYLATION		250	0.241427	1.00103	0.431818	0.55786	1	3460	tags=26%, list=20%, signal=32%
GO_EMBRYONIC_ORGAN_MORPHOGENESIS	GO_EMBRYONIC_ORGAN_MORPHOGENESIS		268	0.3084	1.00118	0.444444	0.557892	1	3678	tags=29%, list=21%, signal=37%
GO_CELL_CYCLE_ARREST	GO_CELL_CYCLE_ARREST		141	0.258142	1.00041	0.431174	0.558646	1	3484	tags=23%, list=20%, signal=29%
GO_PROTEIN_LOCALIZATION_TO_CENTROSOME	GO_PROTEIN_LOCALIZATION_TO_CENTROSOME		15	0.480854	0.999468	0.5	0.55946	1	2240	tags=33%, list=13%, signal=38%
GO_REGULATION_OF_RAS_PROTEIN_SIGNAL_TRANSDUCTION	GO_REGULATION_OF_RAS_PROTEIN_SIGNAL_TRANSDUCTION		171	0.267182	0.999564	0.444672	0.5596	1	3325	tags=25%, list=19%, signal=31%
GO_PH_REDUCTION	GO_PH_REDUCTION		37	0.317792	0.998826	0.432927	0.559733	1	3646	tags=30%, list=21%, signal=38%
GO_REGULATION_OF_CAMP_MEDIATED_SIGNALING	GO_REGULATION_OF_CAMP_MEDIATED_SIGNALING		22	0.434927	0.999607	0.459959	0.559806	1	818	tags=14%, list=5%, signal=14%
GO_ANDROGEN_RECEPTOR_SIGNALING_PATHWAY	GO_ANDROGEN_RECEPTOR_SIGNALING_PATHWAY		39	0.294807	0.998834	0.450787	0.560025	1	2177	tags=13%, list=13%, signal=15%
GO_RESPONSE_TO_FIBROBLAST_GROWTH_FACTOR	GO_RESPONSE_TO_FIBROBLAST_GROWTH_FACTOR		109	0.289711	0.998002	0.466942	0.560067	1	1579	tags=14%, list=9%, signal=15%
GO_CIRCADIAN_RHYTHM	GO_CIRCADIAN_RHYTHM		128	0.278356	0.998475	0.442149	0.5601	1	2177	tags=16%, list=13%, signal=18%
GO_BETA_CATENIN_DESTRUCTION_COMPLEX_DISASSEMBLY	GO_BETA_CATENIN_DESTRUCTION_COMPLEX_DISASSEMBLY		20	0.360294	0.998059	0.451417	0.560262	1	943	tags=15%, list=5%, signal=16%
GO_REGULATION_OF_MEMBRANE_LIPID_DISTRIBUTION	GO_REGULATION_OF_MEMBRANE_LIPID_DISTRIBUTION		34	0.350417	0.998856	0.456311	0.56029	1	1704	tags=26%, list=10%, signal=29%
GO_HOMEOSTASIS_OF_NUMBER_OF_CELLS_WITHIN_A_TISSUE	GO_HOMEOSTASIS_OF_NUMBER_OF_CELLS_WITHIN_A_TISSUE		28	0.344181	0.998116	0.461694	0.560453	1	3352	tags=29%, list=19%, signal=35%
GO_CELL_AGGREGATION	GO_CELL_AGGREGATION		19	0.415536	0.996845	0.457426	0.561814	1	3352	tags=32%, list=19%, signal=39%
GO_REGULATION_OF_DEPHOSPHORYLATION	GO_REGULATION_OF_DEPHOSPHORYLATION		134	0.28833	0.99657	0.460905	0.562001	1	1940	tags=17%, list=11%, signal=19%
GO_POSITIVE_REGULATION_OF_CELLULAR_COMPONENT_BIOGENESIS	GO_POSITIVE_REGULATION_OF_CELLULAR_COMPONENT_BIOGENESIS		357	0.264094	0.996167	0.445378	0.562411	1	3678	tags=29%, list=21%, signal=36%
GO_REGULATION_OF_KERATINOCYTE_DIFFERENTIATION	GO_REGULATION_OF_KERATINOCYTE_DIFFERENTIATION		22	0.367993	0.995731	0.450102	0.562583	1	1181	tags=14%, list=7%, signal=15%
GO_POSITIVE_REGULATION_OF_DNA_REPLICATION	GO_POSITIVE_REGULATION_OF_DNA_REPLICATION		82	0.309548	0.995891	0.437137	0.562584	1	2592	tags=18%, list=15%, signal=21%
GO_BICARBONATE_TRANSPORT	GO_BICARBONATE_TRANSPORT	Details ...	41	0.672332	1.75372	0	0.563156	0.808	1141	tags=27%, list=7%, signal=29%
GO_NEGATIVE_REGULATION_OF_GTPASE_ACTIVITY	GO_NEGATIVE_REGULATION_OF_GTPASE_ACTIVITY		39	0.346235	0.995184	0.439364	0.563229	1	1557	tags=18%, list=9%, signal=20%
GO_REGULATION_OF_EPITHELIAL_TO_MESENCHYMAL_TRANSITION	GO_REGULATION_OF_EPITHELIAL_TO_MESENCHYMAL_TRANSITION		63	0.343807	0.994783	0.439122	0.563641	1	3053	tags=32%, list=18%, signal=38%
GO_SINGLE_ORGANISM_MEMBRANE_FUSION	GO_SINGLE_ORGANISM_MEMBRANE_FUSION		106	0.283923	0.994135	0.423529	0.564218	1	2529	tags=19%, list=15%, signal=22%
GO_REGULATION_OF_MORPHOGENESIS_OF_A_BRANCHING_STRUCTURE	GO_REGULATION_OF_MORPHOGENESIS_OF_A_BRANCHING_STRUCTURE		53	0.362516	0.994295	0.463654	0.564232	1	1737	tags=21%, list=10%, signal=23%
GO_NEGATIVE_REGULATION_OF_NEURON_DEATH	GO_NEGATIVE_REGULATION_OF_NEURON_DEATH		154	0.296304	0.99383	0.456612	0.564452	1	2619	tags=21%, list=15%, signal=25%
GO_POSITIVE_REGULATION_OF_MITOCHONDRIAL_MEMBRANE_PERMEABILITY	GO_POSITIVE_REGULATION_OF_MITOCHONDRIAL_MEMBRANE_PERMEABILITY		17	0.377696	0.993333	0.479924	0.564766	1	2529	tags=24%, list=15%, signal=28%
GO_REGULATION_OF_RUFFLE_ASSEMBLY	GO_REGULATION_OF_RUFFLE_ASSEMBLY		18	0.373312	0.993371	0.465979	0.564997	1	1639	tags=22%, list=10%, signal=25%
GO_CELLULAR_PROTEIN_COMPLEX_ASSEMBLY	GO_CELLULAR_PROTEIN_COMPLEX_ASSEMBLY		302	0.227812	0.992952	0.475634	0.565164	1	4441	tags=31%, list=26%, signal=42%
GO_CANONICAL_WNT_SIGNALING_PATHWAY	GO_CANONICAL_WNT_SIGNALING_PATHWAY		90	0.295114	0.992508	0.469729	0.565685	1	1737	tags=13%, list=10%, signal=15%
GO_REGULATION_OF_SMALL_GTPASE_MEDIATED_SIGNAL_TRANSDUCTION	GO_REGULATION_OF_SMALL_GTPASE_MEDIATED_SIGNAL_TRANSDUCTION		258	0.26292	0.991891	0.45929	0.566521	1	3325	tags=25%, list=19%, signal=31%
GO_CELLULAR_MODIFIED_AMINO_ACID_CATABOLIC_PROCESS	GO_CELLULAR_MODIFIED_AMINO_ACID_CATABOLIC_PROCESS		16	0.425709	0.989594	0.518672	0.570095	1	2904	tags=31%, list=17%, signal=38%
GO_REGULATION_OF_STEM_CELL_POPULATION_MAINTENANCE	GO_REGULATION_OF_STEM_CELL_POPULATION_MAINTENANCE		17	0.340538	0.989638	0.460474	0.570314	1	161	tags=6%, list=1%, signal=6%
GO_REGULATION_OF_MITOCHONDRIAL_DEPOLARIZATION	GO_REGULATION_OF_MITOCHONDRIAL_DEPOLARIZATION		17	0.428175	0.988834	0.488934	0.571182	1	2619	tags=41%, list=15%, signal=49%
GO_POSITIVE_REGULATION_OF_MYOTUBE_DIFFERENTIATION	GO_POSITIVE_REGULATION_OF_MYOTUBE_DIFFERENTIATION	Details ...	29	0.613992	1.71889	0.00390625	0.57119	0.899	2655	tags=34%, list=15%, signal=41%
GO_TRACHEA_DEVELOPMENT	GO_TRACHEA_DEVELOPMENT		20	0.37668	0.987981	0.479125	0.572351	1	3365	tags=25%, list=20%, signal=31%
GO_SMOOTHENED_SIGNALING_PATHWAY	GO_SMOOTHENED_SIGNALING_PATHWAY		63	0.293522	0.986557	0.47786	0.574624	1	3645	tags=32%, list=21%, signal=40%
GO_CARDIAC_CHAMBER_MORPHOGENESIS	GO_CARDIAC_CHAMBER_MORPHOGENESIS		100	0.31575	0.986374	0.489879	0.574647	1	3708	tags=29%, list=22%, signal=37%
GO_SENSORY_PERCEPTION_OF_TASTE	GO_SENSORY_PERCEPTION_OF_TASTE		50	0.27672	0.985963	0.503093	0.575048	1	3288	tags=14%, list=19%, signal=17%
GO_INTERMEDIATE_FILAMENT_ORGANIZATION	GO_INTERMEDIATE_FILAMENT_ORGANIZATION		18	0.419472	0.984863	0.49899	0.576783	1	1324	tags=11%, list=8%, signal=12%
GO_LENS_DEVELOPMENT_IN_CAMERA_TYPE_EYE	GO_LENS_DEVELOPMENT_IN_CAMERA_TYPE_EYE		62	0.300647	0.984182	0.46493	0.577693	1	3616	tags=29%, list=21%, signal=37%
GO_REGULATION_OF_ANION_TRANSPORT	GO_REGULATION_OF_ANION_TRANSPORT		128	0.280781	0.983888	0.441634	0.577889	1	2597	tags=18%, list=15%, signal=21%
GO_RESPONSE_TO_VITAMIN_A	GO_RESPONSE_TO_VITAMIN_A		20	0.35439	0.983069	0.485207	0.578112	1	2965	tags=20%, list=17%, signal=24%
GO_METAPHASE_PLATE_CONGRESSION	GO_METAPHASE_PLATE_CONGRESSION		41	0.457519	0.983194	0.550864	0.578207	1	3432	tags=29%, list=20%, signal=36%
GO_REGULATION_OF_STRESS_ACTIVATED_PROTEIN_KINASE_SIGNALING_CASCADE	GO_REGULATION_OF_STRESS_ACTIVATED_PROTEIN_KINASE_SIGNALING_CASCADE		189	0.260834	0.983347	0.490946	0.578267	1	2342	tags=17%, list=14%, signal=20%
GO_POSITIVE_REGULATION_OF_TRANSMEMBRANE_RECEPTOR_PROTEIN_SERINE_THREONINE_KINASE_SIGNALING_PATHWAY	GO_POSITIVE_REGULATION_OF_TRANSMEMBRANE_RECEPTOR_PROTEIN_SERINE_THREONINE_KINASE_SIGNALING_PATHWAY		93	0.317886	0.983515	0.485772	0.578273	1	1493	tags=20%, list=9%, signal=22%
GO_ODONTOGENESIS_OF_DENTIN_CONTAINING_TOOTH	GO_ODONTOGENESIS_OF_DENTIN_CONTAINING_TOOTH		72	0.317356	0.982597	0.478175	0.578656	1	3722	tags=32%, list=22%, signal=41%
GO_NEGATIVE_REGULATION_OF_CELL_GROWTH	GO_NEGATIVE_REGULATION_OF_CELL_GROWTH		161	0.270485	0.98221	0.488613	0.579052	1	2999	tags=23%, list=17%, signal=28%
GO_ORGAN_FORMATION	GO_ORGAN_FORMATION		33	0.329573	0.981262	0.495968	0.58051	1	2174	tags=21%, list=13%, signal=24%
GO_REGULATION_OF_PATHWAY_RESTRICTED_SMAD_PROTEIN_PHOSPHORYLATION	GO_REGULATION_OF_PATHWAY_RESTRICTED_SMAD_PROTEIN_PHOSPHORYLATION		57	0.336102	0.979734	0.465263	0.58308	1	2357	tags=26%, list=14%, signal=30%
GO_SENSORY_ORGAN_DEVELOPMENT	GO_SENSORY_ORGAN_DEVELOPMENT		463	0.2634	0.979392	0.505859	0.583418	1	3522	tags=27%, list=20%, signal=33%
GO_PEPTIDYL_ASPARAGINE_MODIFICATION	GO_PEPTIDYL_ASPARAGINE_MODIFICATION		38	0.324228	0.979191	0.465517	0.58352	1	5740	tags=66%, list=33%, signal=99%
GO_NEGATIVE_REGULATION_OF_CATION_TRANSMEMBRANE_TRANSPORT	GO_NEGATIVE_REGULATION_OF_CATION_TRANSMEMBRANE_TRANSPORT		57	0.314515	0.978359	0.485089	0.58412	1	2994	tags=23%, list=17%, signal=28%
GO_NEGATIVE_REGULATION_OF_AXON_GUIDANCE	GO_NEGATIVE_REGULATION_OF_AXON_GUIDANCE		26	0.402895	0.978669	0.489627	0.584175	1	3367	tags=35%, list=20%, signal=43%
GO_REGULATION_OF_MYOBLAST_DIFFERENTIATION	GO_REGULATION_OF_MYOBLAST_DIFFERENTIATION		45	0.346613	0.978466	0.471816	0.584251	1	818	tags=13%, list=5%, signal=14%
GO_REGULATION_OF_RESPONSE_TO_CYTOKINE_STIMULUS	GO_REGULATION_OF_RESPONSE_TO_CYTOKINE_STIMULUS	Details ...	125	0.591528	1.7671	0	0.585152	0.759	2744	tags=37%, list=16%, signal=43%
GO_REGULATION_OF_SYSTEM_PROCESS	GO_REGULATION_OF_SYSTEM_PROCESS		485	0.27298	0.977475	0.482402	0.58551	1	2547	tags=18%, list=15%, signal=21%
GO_NEGATIVE_REGULATION_OF_CALCIUM_ION_TRANSMEMBRANE_TRANSPORT	GO_NEGATIVE_REGULATION_OF_CALCIUM_ION_TRANSMEMBRANE_TRANSPORT		26	0.357604	0.976626	0.487379	0.586178	1	2204	tags=19%, list=13%, signal=22%
GO_EPIBOLY	GO_EPIBOLY		19	0.42195	0.976788	0.480885	0.586208	1	3083	tags=42%, list=18%, signal=51%
GO_CELL_MATURATION	GO_CELL_MATURATION		119	0.271958	0.976949	0.491461	0.586211	1	2192	tags=16%, list=13%, signal=18%
GO_POSITIVE_REGULATION_OF_NEUROLOGICAL_SYSTEM_PROCESS	GO_POSITIVE_REGULATION_OF_NEUROLOGICAL_SYSTEM_PROCESS		20	0.377674	0.975858	0.519038	0.586694	1	3827	tags=35%, list=22%, signal=45%
GO_MALE_GAMETE_GENERATION	GO_MALE_GAMETE_GENERATION		396	0.204559	0.976099	0.487713	0.586848	1	4434	tags=25%, list=26%, signal=33%
GO_AXONEMAL_DYNEIN_COMPLEX_ASSEMBLY	GO_AXONEMAL_DYNEIN_COMPLEX_ASSEMBLY		15	0.488673	0.975925	0.540797	0.586881	1	4422	tags=47%, list=26%, signal=63%
GO_PEPTIDE_METABOLIC_PROCESS	GO_PEPTIDE_METABOLIC_PROCESS		455	0.216015	0.97541	0.488095	0.587175	1	3776	tags=22%, list=22%, signal=28%
GO_ANTIGEN_PROCESSING_AND_PRESENTATION_OF_PEPTIDE_OR_POLYSACCHARIDE_ANTIGEN_VIA_MHC_CLASS_II	GO_ANTIGEN_PROCESSING_AND_PRESENTATION_OF_PEPTIDE_OR_POLYSACCHARIDE_ANTIGEN_VIA_MHC_CLASS_II		84	0.350886	0.975043	0.511583	0.587556	1	2539	tags=29%, list=15%, signal=33%
GO_VACUOLE_FUSION	GO_VACUOLE_FUSION		20	0.34492	0.974721	0.498054	0.587571	1	412	tags=5%, list=2%, signal=5%
GO_ALPHA_AMINO_ACID_CATABOLIC_PROCESS	GO_ALPHA_AMINO_ACID_CATABOLIC_PROCESS		87	0.324308	0.974874	0.438247	0.58758	1	2904	tags=23%, list=17%, signal=28%
GO_REGULATION_OF_STEROID_BIOSYNTHETIC_PROCESS	GO_REGULATION_OF_STEROID_BIOSYNTHETIC_PROCESS		48	0.32285	0.973226	0.522	0.589067	1	3039	tags=35%, list=18%, signal=43%
GO_LIPID_DIGESTION	GO_LIPID_DIGESTION		19	0.358054	0.973503	0.493014	0.589187	1	1218	tags=11%, list=7%, signal=11%
GO_POSITIVE_REGULATION_OF_CALCIUM_ION_TRANSMEMBRANE_TRANSPORT	GO_POSITIVE_REGULATION_OF_CALCIUM_ION_TRANSMEMBRANE_TRANSPORT		52	0.330439	0.973301	0.506148	0.589245	1	1891	tags=15%, list=11%, signal=17%
GO_HISTONE_H2A_UBIQUITINATION	GO_HISTONE_H2A_UBIQUITINATION		16	0.305116	0.973628	0.486274	0.589271	1	406	tags=6%, list=2%, signal=6%
GO_POSITIVE_REGULATION_OF_DNA_METABOLIC_PROCESS	GO_POSITIVE_REGULATION_OF_DNA_METABOLIC_PROCESS		167	0.277291	0.972343	0.493308	0.589474	1	2708	tags=20%, list=16%, signal=23%
GO_REGULATION_OF_EXIT_FROM_MITOSIS	GO_REGULATION_OF_EXIT_FROM_MITOSIS		15	0.460619	0.972407	0.51462	0.589672	1	1060	tags=13%, list=6%, signal=14%
GO_REGULATION_OF_ERAD_PATHWAY	GO_REGULATION_OF_ERAD_PATHWAY		27	0.300175	0.972569	0.528689	0.589684	1	3321	tags=30%, list=19%, signal=37%
GO_CYTOLYSIS	GO_CYTOLYSIS		21	0.427813	0.972663	0.49904	0.589803	1	3281	tags=38%, list=19%, signal=47%
GO_NEGATIVE_REGULATION_OF_ION_TRANSPORT	GO_NEGATIVE_REGULATION_OF_ION_TRANSPORT		118	0.306158	0.971064	0.527163	0.590909	1	1967	tags=18%, list=11%, signal=20%
GO_REGULATION_OF_RECEPTOR_ACTIVITY	GO_REGULATION_OF_RECEPTOR_ACTIVITY		112	0.293558	0.970849	0.512448	0.590991	1	2414	tags=21%, list=14%, signal=24%
GO_REGULATION_OF_MITOCHONDRIAL_MEMBRANE_PERMEABILITY_INVOLVED_IN_APOPTOTIC_PROCESS	GO_REGULATION_OF_MITOCHONDRIAL_MEMBRANE_PERMEABILITY_INVOLVED_IN_APOPTOTIC_PROCESS		21	0.353454	0.971095	0.506823	0.591163	1	1231	tags=14%, list=7%, signal=15%
GO_RESPONSE_TO_UV	GO_RESPONSE_TO_UV		116	0.296332	0.971137	0.506718	0.591389	1	3662	tags=28%, list=21%, signal=35%
GO_POSITIVE_REGULATION_OF_MONOOXYGENASE_ACTIVITY	GO_POSITIVE_REGULATION_OF_MONOOXYGENASE_ACTIVITY		27	0.338852	0.968477	0.498062	0.594578	1	4108	tags=30%, list=24%, signal=39%
GO_NEGATIVE_REGULATION_OF_MYOBLAST_DIFFERENTIATION	GO_NEGATIVE_REGULATION_OF_MYOBLAST_DIFFERENTIATION		23	0.395778	0.968572	0.481633	0.594726	1	514	tags=17%, list=3%, signal=18%
GO_CAMP_BIOSYNTHETIC_PROCESS	GO_CAMP_BIOSYNTHETIC_PROCESS		16	0.383292	0.967857	0.501901	0.594798	1	71	tags=6%, list=0%, signal=6%
GO_POSITIVE_REGULATION_OF_RELEASE_OF_CYTOCHROME_C_FROM_MITOCHONDRIA	GO_POSITIVE_REGULATION_OF_RELEASE_OF_CYTOCHROME_C_FROM_MITOCHONDRIA		26	0.368828	0.967685	0.510597	0.594817	1	3354	tags=42%, list=19%, signal=52%
GO_REGULATION_OF_RESPONSE_TO_DNA_DAMAGE_STIMULUS	GO_REGULATION_OF_RESPONSE_TO_DNA_DAMAGE_STIMULUS		129	0.276806	0.967934	0.495164	0.594968	1	4636	tags=36%, list=27%, signal=48%
GO_MEMBRANE_LIPID_BIOSYNTHETIC_PROCESS	GO_MEMBRANE_LIPID_BIOSYNTHETIC_PROCESS		100	0.265804	0.967974	0.492929	0.595201	1	3103	tags=24%, list=18%, signal=29%
GO_HEART_GROWTH	GO_HEART_GROWTH		22	0.405261	0.966713	0.504799	0.596339	1	2940	tags=27%, list=17%, signal=33%
GO_TONGUE_DEVELOPMENT	GO_TONGUE_DEVELOPMENT		18	0.380609	0.966063	0.493097	0.596557	1	2199	tags=22%, list=13%, signal=25%
GO_MITOCHONDRIAL_TRANSPORT	GO_MITOCHONDRIAL_TRANSPORT		137	0.229538	0.966118	0.492958	0.596756	1	3354	tags=19%, list=19%, signal=23%
GO_MESENCHYME_DEVELOPMENT	GO_MESENCHYME_DEVELOPMENT		179	0.311082	0.966227	0.501916	0.596856	1	3367	tags=32%, list=20%, signal=40%
GO_ORGANELLE_MEMBRANE_FUSION	GO_ORGANELLE_MEMBRANE_FUSION		81	0.289277	0.965277	0.496994	0.59769	1	2467	tags=20%, list=14%, signal=23%
GO_GLYCOLIPID_BIOSYNTHETIC_PROCESS	GO_GLYCOLIPID_BIOSYNTHETIC_PROCESS		60	0.2959	0.964736	0.516194	0.598075	1	3103	tags=27%, list=18%, signal=32%
GO_MAINTENANCE_OF_GASTROINTESTINAL_EPITHELIUM	GO_MAINTENANCE_OF_GASTROINTESTINAL_EPITHELIUM		15	0.385438	0.964537	0.518375	0.598127	1	3613	tags=27%, list=21%, signal=34%
GO_POSITIVE_REGULATION_OF_CELL_MORPHOGENESIS_INVOLVED_IN_DIFFERENTIATION	GO_POSITIVE_REGULATION_OF_CELL_MORPHOGENESIS_INVOLVED_IN_DIFFERENTIATION		152	0.286381	0.96478	0.508368	0.598302	1	2357	tags=22%, list=14%, signal=26%
GO_PHOSPHATIDYLGLYCEROL_ACYL_CHAIN_REMODELING	GO_PHOSPHATIDYLGLYCEROL_ACYL_CHAIN_REMODELING	Details ...	15	0.785893	1.75678	0	0.599434	0.795	675	tags=20%, list=4%, signal=21%
GO_FEMALE_GENITALIA_DEVELOPMENT	GO_FEMALE_GENITALIA_DEVELOPMENT		16	0.35961	0.963059	0.488934	0.600209	1	3453	tags=44%, list=20%, signal=55%
GO_GENITALIA_DEVELOPMENT	GO_GENITALIA_DEVELOPMENT		42	0.303867	0.963073	0.516393	0.600494	1	3453	tags=29%, list=20%, signal=36%
GO_REGULATION_OF_GLIAL_CELL_PROLIFERATION	GO_REGULATION_OF_GLIAL_CELL_PROLIFERATION		20	0.389952	0.960503	0.520629	0.604585	1	1506	tags=25%, list=9%, signal=27%
GO_NEGATIVE_REGULATION_OF_PROTEIN_KINASE_B_SIGNALING	GO_NEGATIVE_REGULATION_OF_PROTEIN_KINASE_B_SIGNALING		33	0.296959	0.959816	0.518367	0.605223	1	3095	tags=27%, list=18%, signal=33%
GO_POSITIVE_REGULATION_OF_GLUCOSE_METABOLIC_PROCESS	GO_POSITIVE_REGULATION_OF_GLUCOSE_METABOLIC_PROCESS		33	0.316967	0.959955	0.547094	0.605299	1	3662	tags=30%, list=21%, signal=38%
GO_POSITIVE_REGULATION_OF_LIGASE_ACTIVITY	GO_POSITIVE_REGULATION_OF_LIGASE_ACTIVITY		99	0.297066	0.95926	0.502835	0.605965	1	3533	tags=21%, list=21%, signal=27%
GO_NEGATIVE_REGULATION_OF_LIPID_METABOLIC_PROCESS	GO_NEGATIVE_REGULATION_OF_LIPID_METABOLIC_PROCESS		68	0.285845	0.959004	0.544513	0.606174	1	3039	tags=29%, list=18%, signal=36%
GO_PURINE_CONTAINING_COMPOUND_METABOLIC_PROCESS	GO_PURINE_CONTAINING_COMPOUND_METABOLIC_PROCESS		344	0.223663	0.958047	0.509921	0.60702	1	3095	tags=18%, list=18%, signal=21%
GO_RESPONSE_TO_MUSCLE_ACTIVITY	GO_RESPONSE_TO_MUSCLE_ACTIVITY		16	0.423007	0.958174	0.511202	0.607089	1	2177	tags=31%, list=13%, signal=36%
GO_CYTOKINE_PRODUCTION_INVOLVED_IN_IMMUNE_RESPONSE	GO_CYTOKINE_PRODUCTION_INVOLVED_IN_IMMUNE_RESPONSE		16	0.451828	0.957808	0.553279	0.607172	1	2387	tags=44%, list=14%, signal=51%
GO_STEROL_BIOSYNTHETIC_PROCESS	GO_STEROL_BIOSYNTHETIC_PROCESS		40	0.325567	0.958176	0.507722	0.6074	1	1827	tags=15%, list=11%, signal=17%
GO_INTRACELLULAR_STEROID_HORMONE_RECEPTOR_SIGNALING_PATHWAY	GO_INTRACELLULAR_STEROID_HORMONE_RECEPTOR_SIGNALING_PATHWAY		65	0.246939	0.956323	0.544732	0.609651	1	3599	tags=20%, list=21%, signal=25%
GO_RENAL_WATER_HOMEOSTASIS	GO_RENAL_WATER_HOMEOSTASIS		33	0.349342	0.955559	0.509579	0.610785	1	1333	tags=12%, list=8%, signal=13%
GO_POSITIVE_REGULATION_OF_SIGNAL_TRANSDUCTION_BY_P53_CLASS_MEDIATOR	GO_POSITIVE_REGULATION_OF_SIGNAL_TRANSDUCTION_BY_P53_CLASS_MEDIATOR		17	0.37606	0.95396	0.523719	0.612821	1	4674	tags=47%, list=27%, signal=65%
GO_REGULATION_OF_MUSCLE_ADAPTATION	GO_REGULATION_OF_MUSCLE_ADAPTATION		62	0.294812	0.954059	0.542169	0.612971	1	2177	tags=19%, list=13%, signal=22%
GO_POSITIVE_REGULATION_OF_EPIDERMAL_CELL_DIFFERENTIATION	GO_POSITIVE_REGULATION_OF_EPIDERMAL_CELL_DIFFERENTIATION		15	0.386125	0.954227	0.507663	0.612979	1	65	tags=7%, list=0%, signal=7%
GO_NEGATIVE_REGULATION_OF_KIDNEY_DEVELOPMENT	GO_NEGATIVE_REGULATION_OF_KIDNEY_DEVELOPMENT		17	0.381262	0.953237	0.510163	0.613853	1	4312	tags=35%, list=25%, signal=47%
GO_STEM_CELL_DIVISION	GO_STEM_CELL_DIVISION		28	0.373215	0.95219	0.53663	0.615191	1	3004	tags=39%, list=17%, signal=48%
GO_APOPTOTIC_PROCESS_INVOLVED_IN_MORPHOGENESIS	GO_APOPTOTIC_PROCESS_INVOLVED_IN_MORPHOGENESIS		15	0.377267	0.95231	0.520325	0.615293	1	3473	tags=40%, list=20%, signal=50%
GO_VENOUS_BLOOD_VESSEL_DEVELOPMENT	GO_VENOUS_BLOOD_VESSEL_DEVELOPMENT		15	0.434864	0.951849	0.531746	0.615502	1	3365	tags=47%, list=20%, signal=58%
GO_NEGATIVE_REGULATION_OF_RELEASE_OF_CYTOCHROME_C_FROM_MITOCHONDRIA	GO_NEGATIVE_REGULATION_OF_RELEASE_OF_CYTOCHROME_C_FROM_MITOCHONDRIA		16	0.365388	0.951171	0.528942	0.615832	1	4289	tags=44%, list=25%, signal=58%
GO_FUCOSYLATION	GO_FUCOSYLATION		22	0.30685	0.951282	0.526316	0.615938	1	1927	tags=14%, list=11%, signal=15%
GO_RESPONSE_TO_PROSTAGLANDIN	GO_RESPONSE_TO_PROSTAGLANDIN		34	0.340888	0.951334	0.523139	0.616148	1	1019	tags=15%, list=6%, signal=16%
GO_REGULATION_OF_DNA_METABOLIC_PROCESS	GO_REGULATION_OF_DNA_METABOLIC_PROCESS		308	0.258188	0.949902	0.531128	0.6176	1	2708	tags=18%, list=16%, signal=20%
GO_NEGATIVE_REGULATION_OF_CYTOPLASMIC_TRANSPORT	GO_NEGATIVE_REGULATION_OF_CYTOPLASMIC_TRANSPORT		109	0.248415	0.950043	0.584677	0.617669	1	3536	tags=27%, list=21%, signal=33%
GO_PHOSPHATIDYLETHANOLAMINE_ACYL_CHAIN_REMODELING	GO_PHOSPHATIDYLETHANOLAMINE_ACYL_CHAIN_REMODELING	Details ...	19	0.749674	1.77302	0	0.618024	0.738	1495	tags=26%, list=9%, signal=29%
GO_RESPONSE_TO_MUSCLE_STRETCH	GO_RESPONSE_TO_MUSCLE_STRETCH		19	0.360708	0.948459	0.541748	0.618605	1	2098	tags=21%, list=12%, signal=24%
GO_EMBRYONIC_CAMERA_TYPE_EYE_DEVELOPMENT	GO_EMBRYONIC_CAMERA_TYPE_EYE_DEVELOPMENT		35	0.355522	0.948805	0.532039	0.618641	1	3616	tags=37%, list=21%, signal=47%
GO_REGULATION_OF_STEM_CELL_DIFFERENTIATION	GO_REGULATION_OF_STEM_CELL_DIFFERENTIATION		106	0.296066	0.948073	0.550102	0.6187	1	3053	tags=26%, list=18%, signal=32%
GO_REGULATION_OF_NUCLEAR_DIVISION	GO_REGULATION_OF_NUCLEAR_DIVISION		153	0.341537	0.948211	0.551657	0.618735	1	4901	tags=37%, list=28%, signal=52%
GO_REGULATION_OF_CARDIAC_MUSCLE_CELL_ACTION_POTENTIAL	GO_REGULATION_OF_CARDIAC_MUSCLE_CELL_ACTION_POTENTIAL		19	0.380498	0.948474	0.532922	0.618897	1	1777	tags=21%, list=10%, signal=23%
GO_NUCLEAR_IMPORT	GO_NUCLEAR_IMPORT		117	0.242633	0.948824	0.575639	0.618927	1	2997	tags=21%, list=17%, signal=25%
GO_PHENOL_CONTAINING_COMPOUND_BIOSYNTHETIC_PROCESS	GO_PHENOL_CONTAINING_COMPOUND_BIOSYNTHETIC_PROCESS		32	0.35445	0.94892	0.541082	0.619069	1	1464	tags=13%, list=9%, signal=14%
GO_REGULATION_OF_CYCLIC_NUCLEOTIDE_METABOLIC_PROCESS	GO_REGULATION_OF_CYCLIC_NUCLEOTIDE_METABOLIC_PROCESS		148	0.276923	0.947625	0.529046	0.619201	1	1737	tags=13%, list=10%, signal=14%
GO_MODULATION_OF_TRANSCRIPTION_IN_OTHER_ORGANISM_INVOLVED_IN_SYMBIOTIC_INTERACTION	GO_MODULATION_OF_TRANSCRIPTION_IN_OTHER_ORGANISM_INVOLVED_IN_SYMBIOTIC_INTERACTION		21	0.324682	0.94711	0.52919	0.619575	1	2199	tags=19%, list=13%, signal=22%
GO_REGULATION_OF_FATTY_ACID_OXIDATION	GO_REGULATION_OF_FATTY_ACID_OXIDATION		27	0.345394	0.947246	0.54065	0.619627	1	3662	tags=44%, list=21%, signal=56%
GO_DETECTION_OF_MECHANICAL_STIMULUS_INVOLVED_IN_SENSORY_PERCEPTION	GO_DETECTION_OF_MECHANICAL_STIMULUS_INVOLVED_IN_SENSORY_PERCEPTION		22	0.377551	0.946519	0.533755	0.62002	1	821	tags=9%, list=5%, signal=10%
GO_NEURAL_PRECURSOR_CELL_PROLIFERATION	GO_NEURAL_PRECURSOR_CELL_PROLIFERATION		69	0.304324	0.946646	0.560928	0.620111	1	3623	tags=35%, list=21%, signal=44%
GO_REGULATION_OF_TELOMERASE_ACTIVITY	GO_REGULATION_OF_TELOMERASE_ACTIVITY		39	0.301592	0.945413	0.518293	0.621173	1	2301	tags=15%, list=13%, signal=18%
GO_MESONEPHRIC_TUBULE_MORPHOGENESIS	GO_MESONEPHRIC_TUBULE_MORPHOGENESIS		50	0.317418	0.945005	0.564417	0.621271	1	2322	tags=26%, list=13%, signal=30%
GO_POSITIVE_REGULATION_OF_CALCIUM_ION_TRANSPORT_INTO_CYTOSOL	GO_POSITIVE_REGULATION_OF_CALCIUM_ION_TRANSPORT_INTO_CYTOSOL		47	0.31269	0.94515	0.53178	0.621312	1	2091	tags=15%, list=12%, signal=17%
GO_HEART_TRABECULA_MORPHOGENESIS	GO_HEART_TRABECULA_MORPHOGENESIS		25	0.343685	0.94547	0.536779	0.621374	1	2994	tags=20%, list=17%, signal=24%
GO_POSITIVE_REGULATION_OF_WNT_SIGNALING_PATHWAY	GO_POSITIVE_REGULATION_OF_WNT_SIGNALING_PATHWAY		143	0.258129	0.945514	0.587866	0.621608	1	3204	tags=24%, list=19%, signal=30%
GO_NEGATIVE_REGULATION_OF_ADHERENS_JUNCTION_ORGANIZATION	GO_NEGATIVE_REGULATION_OF_ADHERENS_JUNCTION_ORGANIZATION		15	0.38206	0.942984	0.558282	0.622084	1	3456	tags=40%, list=20%, signal=50%
GO_PROTEIN_TRANSPORT_ALONG_MICROTUBULE	GO_PROTEIN_TRANSPORT_ALONG_MICROTUBULE		25	0.407599	0.943111	0.52552	0.622174	1	3677	tags=40%, list=21%, signal=51%
GO_CELLULAR_PROCESS_INVOLVED_IN_REPRODUCTION_IN_MULTICELLULAR_ORGANISM	GO_CELLULAR_PROCESS_INVOLVED_IN_REPRODUCTION_IN_MULTICELLULAR_ORGANISM		214	0.215023	0.944345	0.590494	0.622179	1	4161	tags=22%, list=24%, signal=29%
GO_REGULATION_OF_PROTEIN_HOMODIMERIZATION_ACTIVITY	GO_REGULATION_OF_PROTEIN_HOMODIMERIZATION_ACTIVITY		21	0.336897	0.942746	0.543307	0.622192	1	4176	tags=33%, list=24%, signal=44%
GO_SCF_DEPENDENT_PROTEASOMAL_UBIQUITIN_DEPENDENT_PROTEIN_CATABOLIC_PROCESS	GO_SCF_DEPENDENT_PROTEASOMAL_UBIQUITIN_DEPENDENT_PROTEIN_CATABOLIC_PROCESS		23	0.322848	0.943164	0.538922	0.622388	1	1337	tags=13%, list=8%, signal=14%
GO_SECONDARY_METABOLITE_BIOSYNTHETIC_PROCESS	GO_SECONDARY_METABOLITE_BIOSYNTHETIC_PROCESS		20	0.351862	0.943489	0.544898	0.622471	1	4618	tags=40%, list=27%, signal=55%
GO_RESPONSE_TO_EPIDERMAL_GROWTH_FACTOR	GO_RESPONSE_TO_EPIDERMAL_GROWTH_FACTOR		27	0.373026	0.943601	0.552734	0.622577	1	1400	tags=19%, list=8%, signal=20%
GO_NEGATIVE_REGULATION_OF_BMP_SIGNALING_PATHWAY	GO_NEGATIVE_REGULATION_OF_BMP_SIGNALING_PATHWAY		35	0.362899	0.943166	0.531317	0.622698	1	2301	tags=23%, list=13%, signal=26%
GO_STRESS_ACTIVATED_PROTEIN_KINASE_SIGNALING_CASCADE	GO_STRESS_ACTIVATED_PROTEIN_KINASE_SIGNALING_CASCADE		97	0.250397	0.943608	0.531959	0.622884	1	3303	tags=28%, list=19%, signal=34%
GO_RETINOIC_ACID_RECEPTOR_SIGNALING_PATHWAY	GO_RETINOIC_ACID_RECEPTOR_SIGNALING_PATHWAY		16	0.33405	0.943685	0.514852	0.623054	1	2616	tags=19%, list=15%, signal=22%
GO_POSITIVE_REGULATION_OF_G_PROTEIN_COUPLED_RECEPTOR_PROTEIN_SIGNALING_PATHWAY	GO_POSITIVE_REGULATION_OF_G_PROTEIN_COUPLED_RECEPTOR_PROTEIN_SIGNALING_PATHWAY		23	0.385821	0.94194	0.54251	0.623394	1	2840	tags=26%, list=17%, signal=31%
GO_REGULATION_OF_TELOMERE_CAPPING	GO_REGULATION_OF_TELOMERE_CAPPING		20	0.349961	0.941689	0.527668	0.62355	1	958	tags=10%, list=6%, signal=11%
GO_CELLULAR_AMINO_ACID_CATABOLIC_PROCESS	GO_CELLULAR_AMINO_ACID_CATABOLIC_PROCESS		104	0.309547	0.94144	0.517103	0.62369	1	2904	tags=24%, list=17%, signal=29%
GO_ORGANELLE_FUSION	GO_ORGANELLE_FUSION		107	0.259657	0.939997	0.571992	0.626059	1	2529	tags=17%, list=15%, signal=20%
GO_CELLULAR_KETONE_METABOLIC_PROCESS	GO_CELLULAR_KETONE_METABOLIC_PROCESS		60	0.299356	0.939716	0.550308	0.626279	1	3028	tags=30%, list=18%, signal=36%
GO_EMBRYONIC_DIGIT_MORPHOGENESIS	GO_EMBRYONIC_DIGIT_MORPHOGENESIS		55	0.307707	0.939293	0.606	0.626734	1	3833	tags=38%, list=22%, signal=49%
GO_NEGATIVE_REGULATION_OF_CELL_JUNCTION_ASSEMBLY	GO_NEGATIVE_REGULATION_OF_CELL_JUNCTION_ASSEMBLY		18	0.364594	0.938957	0.537374	0.627016	1	3537	tags=39%, list=21%, signal=49%
GO_BILE_ACID_METABOLIC_PROCESS	GO_BILE_ACID_METABOLIC_PROCESS		34	0.340764	0.938651	0.524008	0.627289	1	2728	tags=24%, list=16%, signal=28%
GO_NEGATIVE_REGULATION_OF_INTERLEUKIN_10_PRODUCTION	GO_NEGATIVE_REGULATION_OF_INTERLEUKIN_10_PRODUCTION		15	0.361667	0.937767	0.53507	0.628621	1	3815	tags=40%, list=22%, signal=51%
GO_NEGATIVE_REGULATION_OF_PROTEIN_POLYMERIZATION	GO_NEGATIVE_REGULATION_OF_PROTEIN_POLYMERIZATION		52	0.303844	0.937432	0.541833	0.628936	1	3468	tags=31%, list=20%, signal=38%
GO_STEROID_CATABOLIC_PROCESS	GO_STEROID_CATABOLIC_PROCESS		24	0.359298	0.936251	0.562372	0.629197	1	5356	tags=38%, list=31%, signal=54%
GO_CILIUM_ORGANIZATION	GO_CILIUM_ORGANIZATION		156	0.305914	0.935903	0.528972	0.629205	1	3947	tags=31%, list=23%, signal=40%
GO_DETECTION_OF_CHEMICAL_STIMULUS_INVOLVED_IN_SENSORY_PERCEPTION_OF_TASTE	GO_DETECTION_OF_CHEMICAL_STIMULUS_INVOLVED_IN_SENSORY_PERCEPTION_OF_TASTE		32	0.274821	0.936863	0.537037	0.629326	1	1721	tags=6%, list=10%, signal=7%
GO_STEM_CELL_DIFFERENTIATION	GO_STEM_CELL_DIFFERENTIATION		183	0.288113	0.937029	0.59381	0.629332	1	3717	tags=31%, list=22%, signal=39%
GO_MESENCHYMAL_CELL_DIFFERENTIATION	GO_MESENCHYMAL_CELL_DIFFERENTIATION		131	0.30255	0.935991	0.579654	0.629359	1	3367	tags=30%, list=20%, signal=37%
GO_PURINE_NUCLEOSIDE_MONOPHOSPHATE_BIOSYNTHETIC_PROCESS	GO_PURINE_NUCLEOSIDE_MONOPHOSPHATE_BIOSYNTHETIC_PROCESS		35	0.308829	0.936266	0.548387	0.629486	1	2913	tags=23%, list=17%, signal=27%
GO_REGULATION_OF_SKELETAL_MUSCLE_TISSUE_DEVELOPMENT	GO_REGULATION_OF_SKELETAL_MUSCLE_TISSUE_DEVELOPMENT		45	0.302995	0.935515	0.598394	0.629631	1	728	tags=11%, list=4%, signal=12%
GO_NEGATIVE_REGULATION_OF_DNA_METABOLIC_PROCESS	GO_NEGATIVE_REGULATION_OF_DNA_METABOLIC_PROCESS		102	0.245703	0.93652	0.561404	0.629667	1	2708	tags=18%, list=16%, signal=21%
GO_MYELOID_CELL_DEVELOPMENT	GO_MYELOID_CELL_DEVELOPMENT		39	0.28668	0.936273	0.538	0.629791	1	2092	tags=18%, list=12%, signal=20%
GO_NEGATIVE_REGULATION_OF_TRANSPORTER_ACTIVITY	GO_NEGATIVE_REGULATION_OF_TRANSPORTER_ACTIVITY		61	0.300316	0.93522	0.598778	0.629838	1	2994	tags=23%, list=17%, signal=28%
GO_REGULATION_OF_PROTEIN_SUMOYLATION	GO_REGULATION_OF_PROTEIN_SUMOYLATION		18	0.346529	0.934714	0.541247	0.63041	1	2508	tags=22%, list=15%, signal=26%
GO_REGULATION_OF_NOREPINEPHRINE_SECRETION	GO_REGULATION_OF_NOREPINEPHRINE_SECRETION		16	0.450331	0.934056	0.540816	0.631264	1	1703	tags=25%, list=10%, signal=28%
GO_CARDIAC_SEPTUM_MORPHOGENESIS	GO_CARDIAC_SEPTUM_MORPHOGENESIS		47	0.330539	0.933564	0.54771	0.631565	1	1820	tags=21%, list=11%, signal=24%
GO_REGULATION_OF_CALCIUM_ION_TRANSPORT_INTO_CYTOSOL	GO_REGULATION_OF_CALCIUM_ION_TRANSPORT_INTO_CYTOSOL		85	0.285362	0.933704	0.557087	0.631612	1	2204	tags=19%, list=13%, signal=21%
GO_REGULATION_OF_CELL_CYCLE_G1_S_PHASE_TRANSITION	GO_REGULATION_OF_CELL_CYCLE_G1_S_PHASE_TRANSITION		138	0.305487	0.931797	0.55	0.634214	1	3737	tags=29%, list=22%, signal=37%
GO_MORPHOGENESIS_OF_A_POLARIZED_EPITHELIUM	GO_MORPHOGENESIS_OF_A_POLARIZED_EPITHELIUM		26	0.364913	0.931852	0.561303	0.634428	1	3521	tags=35%, list=20%, signal=43%
GO_INTERMEDIATE_FILAMENT_BASED_PROCESS	GO_INTERMEDIATE_FILAMENT_BASED_PROCESS		38	0.31664	0.930536	0.55336	0.63628	1	1365	tags=13%, list=8%, signal=14%
GO_REGULATION_OF_TRANSCRIPTION_REGULATORY_REGION_DNA_BINDING	GO_REGULATION_OF_TRANSCRIPTION_REGULATORY_REGION_DNA_BINDING		35	0.340258	0.930274	0.578842	0.636458	1	1544	tags=17%, list=9%, signal=19%
[truncated: 338 more rows]

## Sheet: GSEA results for low-risk group
NAME	GS<br> follow link to MSigDB	GS DETAILS	SIZE	ES	NES	NOM p-val	FDR q-val	FWER p-val	RANK AT MAX	LEADING EDGE
GO_NEGATIVE_REGULATION_OF_TELOMERE_MAINTENANCE	GO_NEGATIVE_REGULATION_OF_TELOMERE_MAINTENANCE	Details ...	26	-0.550216	-1.76333	0.00932836	1	0.775	4556	tags=58%, list=26%, signal=78%
GO_RNA_SECONDARY_STRUCTURE_UNWINDING	GO_RNA_SECONDARY_STRUCTURE_UNWINDING	Details ...	38	-0.526837	-1.74185	0.0117878	1	0.842	4823	tags=47%, list=28%, signal=66%
GO_REGULATION_OF_PROTEIN_PHOSPHATASE_TYPE_2A_ACTIVITY	GO_REGULATION_OF_PROTEIN_PHOSPHATASE_TYPE_2A_ACTIVITY	Details ...	22	-0.602042	-1.73433	0.0019305	1	0.867	5897	tags=73%, list=34%, signal=111%
GO_NUCLEAR_TRANSCRIBED_MRNA_CATABOLIC_PROCESS_NONSENSE_MEDIATED_DECAY	GO_NUCLEAR_TRANSCRIBED_MRNA_CATABOLIC_PROCESS_NONSENSE_MEDIATED_DECAY	Details ...	81	-0.428414	-1.73279	0.0489237	0.852243	0.871	4770	tags=47%, list=28%, signal=65%
GO_PROTEIN_DEALKYLATION	GO_PROTEIN_DEALKYLATION	Details ...	26	-0.642052	-1.72806	0.0118812	0.718945	0.886	4437	tags=58%, list=26%, signal=78%
GO_HISTONE_H3_K4_METHYLATION	GO_HISTONE_H3_K4_METHYLATION	Details ...	23	-0.597	-1.71353	0.0211538	0.704896	0.909	5932	tags=74%, list=34%, signal=113%
GO_SPLICEOSOMAL_COMPLEX_ASSEMBLY	GO_SPLICEOSOMAL_COMPLEX_ASSEMBLY	Details ...	49	-0.541949	-1.71043	0.0145228	0.625134	0.915	4705	tags=65%, list=27%, signal=90%
GO_MRNA_PROCESSING	GO_MRNA_PROCESSING	Details ...	377	-0.417584	-1.70814	0.0276134	0.560286	0.922	4911	tags=46%, list=29%, signal=63%
GO_POSITIVE_REGULATION_OF_CALCIUM_ION_DEPENDENT_EXOCYTOSIS	GO_POSITIVE_REGULATION_OF_CALCIUM_ION_DEPENDENT_EXOCYTOSIS	Details ...	21	-0.808961	-1.67588	0	0.702795	0.962	926	tags=38%, list=5%, signal=40%
GO_MRNA_CIS_SPLICING_VIA_SPLICEOSOME	GO_MRNA_CIS_SPLICING_VIA_SPLICEOSOME	Details ...	16	-0.640896	-1.67515	0.010101	0.637308	0.964	4675	tags=69%, list=27%, signal=94%
GO_NEGATIVE_REGULATION_OF_TELOMERE_MAINTENANCE_VIA_TELOMERE_LENGTHENING	GO_NEGATIVE_REGULATION_OF_TELOMERE_MAINTENANCE_VIA_TELOMERE_LENGTHENING	Details ...	17	-0.605353	-1.66879	0.0189036	0.621474	0.969	4556	tags=59%, list=26%, signal=80%
GO_N_TERMINAL_PROTEIN_AMINO_ACID_MODIFICATION	GO_N_TERMINAL_PROTEIN_AMINO_ACID_MODIFICATION	Details ...	20	-0.551832	-1.6655	0.0174757	0.592616	0.97	5407	tags=60%, list=31%, signal=87%
GO_REGULATION_OF_RNA_SPLICING	GO_REGULATION_OF_RNA_SPLICING	Details ...	88	-0.465615	-1.66548	0.0367505	0.547102	0.97	2793	tags=27%, list=16%, signal=32%
GO_REGULATION_OF_CLATHRIN_MEDIATED_ENDOCYTOSIS	GO_REGULATION_OF_CLATHRIN_MEDIATED_ENDOCYTOSIS	Details ...	16	-0.698696	-1.64969	0.00957854	0.599389	0.982	2669	tags=50%, list=16%, signal=59%
GO_PEPTIDYL_LYSINE_TRIMETHYLATION	GO_PEPTIDYL_LYSINE_TRIMETHYLATION	Details ...	15	-0.616963	-1.64884	0.0272904	0.564231	0.983	5112	tags=67%, list=30%, signal=95%
GO_RNA_SPLICING_VIA_TRANSESTERIFICATION_REACTIONS	GO_RNA_SPLICING_VIA_TRANSESTERIFICATION_REACTIONS	Details ...	244	-0.430329	-1.64387	0.0603622	0.555597	0.985	4708	tags=48%, list=27%, signal=65%
GO_HISTONE_H4_ACETYLATION	GO_HISTONE_H4_ACETYLATION	Details ...	40	-0.480833	-1.63471	0.0349515	0.573168	0.991	3920	tags=43%, list=23%, signal=55%
GO_TRANSLATIONAL_INITIATION	GO_TRANSLATIONAL_INITIATION	Details ...	101	-0.446965	-1.63182	0.0670732	0.557645	0.991	5603	tags=53%, list=33%, signal=79%
GO_MRNA_SPLICE_SITE_SELECTION	GO_MRNA_SPLICE_SITE_SELECTION	Details ...	26	-0.578312	-1.61834	0.0267686	0.606706	0.993	4449	tags=73%, list=26%, signal=98%
GO_REGULATION_OF_MRNA_SPLICING_VIA_SPLICEOSOME	GO_REGULATION_OF_MRNA_SPLICING_VIA_SPLICEOSOME	Details ...	58	-0.510157	-1.61266	0.0366089	0.610579	0.994	4158	tags=41%, list=24%, signal=54%
GO_RIBONUCLEOPROTEIN_COMPLEX_SUBUNIT_ORGANIZATION	GO_RIBONUCLEOPROTEIN_COMPLEX_SUBUNIT_ORGANIZATION		166	-0.404326	-1.61234	0.0735587	0.583047	0.994	5110	tags=49%, list=30%, signal=70%
GO_POSTSYNAPTIC_MEMBRANE_ORGANIZATION	GO_POSTSYNAPTIC_MEMBRANE_ORGANIZATION		25	-0.726472	-1.60947	0.00747664	0.572595	0.994	632	tags=36%, list=4%, signal=37%
GO_HISTONE_METHYLATION	GO_HISTONE_METHYLATION		69	-0.486185	-1.60826	0.0120482	0.553807	0.994	4969	tags=49%, list=29%, signal=69%
GO_RNA_SPLICING	GO_RNA_SPLICING		325	-0.39756	-1.60307	0.0658683	0.557657	0.994	4911	tags=46%, list=29%, signal=63%
GO_PEPTIDYL_LYSINE_METHYLATION	GO_PEPTIDYL_LYSINE_METHYLATION		55	-0.462388	-1.59513	0.0222222	0.578023	0.995	5749	tags=56%, list=33%, signal=84%
GO_SNRNA_PROCESSING	GO_SNRNA_PROCESSING		20	-0.5954	-1.59145	0.0417495	0.575536	0.995	5217	tags=60%, list=30%, signal=86%
GO_POSITIVE_REGULATION_OF_RNA_SPLICING	GO_POSITIVE_REGULATION_OF_RNA_SPLICING		21	-0.539623	-1.58849	0.04	0.570026	0.995	915	tags=14%, list=5%, signal=15%
GO_PROTEIN_ALKYLATION	GO_PROTEIN_ALKYLATION		93	-0.438621	-1.58788	0.0160643	0.552993	0.996	4860	tags=46%, list=28%, signal=64%
GO_NUCLEAR_TRANSCRIBED_MRNA_CATABOLIC_PROCESS_EXONUCLEOLYTIC	GO_NUCLEAR_TRANSCRIBED_MRNA_CATABOLIC_PROCESS_EXONUCLEOLYTIC		30	-0.570923	-1.57914	0.0651731	0.578181	0.997	4535	tags=53%, list=26%, signal=72%
GO_RNA_METHYLATION	GO_RNA_METHYLATION		39	-0.497413	-1.57512	0.0429448	0.580413	0.997	4215	tags=44%, list=25%, signal=58%
GO_ORGANELLE_TRANSPORT_ALONG_MICROTUBULE	GO_ORGANELLE_TRANSPORT_ALONG_MICROTUBULE		49	-0.521748	-1.57306	0.0382409	0.572993	0.997	3210	tags=35%, list=19%, signal=43%
GO_HISTONE_H3_ACETYLATION	GO_HISTONE_H3_ACETYLATION		39	-0.459781	-1.56192	0.0407767	0.614269	0.997	3068	tags=44%, list=18%, signal=53%
GO_CEREBELLAR_CORTEX_MORPHOGENESIS	GO_CEREBELLAR_CORTEX_MORPHOGENESIS		30	-0.654509	-1.56145	0.0117878	0.598261	0.997	3016	tags=50%, list=18%, signal=61%
GO_PROTEIN_MODIFICATION_BY_SMALL_PROTEIN_REMOVAL	GO_PROTEIN_MODIFICATION_BY_SMALL_PROTEIN_REMOVAL		99	-0.397765	-1.56057	0.0397727	0.58559	0.997	4145	tags=36%, list=24%, signal=48%
GO_CEREBELLAR_CORTEX_FORMATION	GO_CEREBELLAR_CORTEX_FORMATION		22	-0.725161	-1.55839	0.0155642	0.579709	0.997	3016	tags=59%, list=18%, signal=72%
GO_PROTEIN_ACETYLATION	GO_PROTEIN_ACETYLATION		110	-0.411919	-1.55759	0.0389864	0.567666	0.997	3957	tags=44%, list=23%, signal=56%
GO_METENCEPHALON_DEVELOPMENT	GO_METENCEPHALON_DEVELOPMENT		97	-0.539912	-1.54882	0.0135659	0.598994	0.998	2363	tags=31%, list=14%, signal=36%
GO_RIBONUCLEOPROTEIN_COMPLEX_BIOGENESIS	GO_RIBONUCLEOPROTEIN_COMPLEX_BIOGENESIS		352	-0.401175	-1.5485	0.108871	0.584919	0.998	4705	tags=45%, list=27%, signal=61%
GO_RNA_3_END_PROCESSING	GO_RNA_3_END_PROCESSING		90	-0.438492	-1.54837	0.0728745	0.57063	0.998	4705	tags=42%, list=27%, signal=58%
GO_MACROMOLECULE_METHYLATION	GO_MACROMOLECULE_METHYLATION		161	-0.391365	-1.54243	0.0286885	0.586105	0.998	4860	tags=43%, list=28%, signal=59%
GO_PROTEIN_ACYLATION	GO_PROTEIN_ACYLATION		139	-0.383555	-1.52627	0.03125	0.655666	0.999	3531	tags=38%, list=21%, signal=48%
GO_TELOMERE_MAINTENANCE_VIA_TELOMERE_LENGTHENING	GO_TELOMERE_MAINTENANCE_VIA_TELOMERE_LENGTHENING		24	-0.456743	-1.52528	0.0856031	0.645385	0.999	3367	tags=29%, list=20%, signal=36%
GO_TRNA_MODIFICATION	GO_TRNA_MODIFICATION		48	-0.494782	-1.52369	0.0862745	0.638495	0.999	4467	tags=44%, list=26%, signal=59%
GO_ADULT_BEHAVIOR	GO_ADULT_BEHAVIOR		128	-0.555983	-1.52021	0.023622	0.643208	1	2363	tags=28%, list=14%, signal=32%
GO_PROTEIN_DEPOLYMERIZATION	GO_PROTEIN_DEPOLYMERIZATION		21	-0.655509	-1.5176	0.0252427	0.642778	1	1553	tags=29%, list=9%, signal=31%
GO_CELL_DIFFERENTIATION_IN_HINDBRAIN	GO_CELL_DIFFERENTIATION_IN_HINDBRAIN		21	-0.742144	-1.51695	0.0116505	0.632019	1	3319	tags=67%, list=19%, signal=83%
GO_MEMBRANE_DEPOLARIZATION_DURING_ACTION_POTENTIAL	GO_MEMBRANE_DEPOLARIZATION_DURING_ACTION_POTENTIAL		38	-0.652498	-1.51556	0.0254403	0.625298	1	2560	tags=34%, list=15%, signal=40%
GO_REGULATION_OF_ALTERNATIVE_MRNA_SPLICING_VIA_SPLICEOSOME	GO_REGULATION_OF_ALTERNATIVE_MRNA_SPLICING_VIA_SPLICEOSOME		32	-0.580486	-1.51347	0.0512821	0.623104	1	2793	tags=38%, list=16%, signal=45%
GO_AXO_DENDRITIC_TRANSPORT	GO_AXO_DENDRITIC_TRANSPORT		30	-0.495568	-1.51205	0.0520231	0.617163	1	4206	tags=40%, list=24%, signal=53%
GO_ADRENERGIC_RECEPTOR_SIGNALING_PATHWAY	GO_ADRENERGIC_RECEPTOR_SIGNALING_PATHWAY		18	-0.634413	-1.50488	0.0478088	0.642408	1	837	tags=17%, list=5%, signal=18%
GO_CELL_DIFFERENTIATION_IN_SPINAL_CORD	GO_CELL_DIFFERENTIATION_IN_SPINAL_CORD		48	-0.529839	-1.5009	0.0314342	0.651009	1	1724	tags=21%, list=10%, signal=23%
GO_POSITIVE_REGULATION_OF_EXCITATORY_POSTSYNAPTIC_POTENTIAL	GO_POSITIVE_REGULATION_OF_EXCITATORY_POSTSYNAPTIC_POTENTIAL		20	-0.802583	-1.49987	0.00767754	0.643433	1	632	tags=45%, list=4%, signal=47%
GO_CEREBELLAR_PURKINJE_CELL_LAYER_DEVELOPMENT	GO_CEREBELLAR_PURKINJE_CELL_LAYER_DEVELOPMENT		23	-0.636063	-1.49605	0.0250965	0.649417	1	3016	tags=57%, list=18%, signal=68%
GO_SPINAL_CORD_DEVELOPMENT	GO_SPINAL_CORD_DEVELOPMENT		96	-0.492297	-1.49207	0.00199203	0.657824	1	3051	tags=31%, list=18%, signal=38%
GO_CYCLIC_NUCLEOTIDE_MEDIATED_SIGNALING	GO_CYCLIC_NUCLEOTIDE_MEDIATED_SIGNALING		42	-0.544943	-1.49148	0.0118343	0.648822	1	1977	tags=26%, list=11%, signal=30%
GO_REGULATION_OF_POSTSYNAPTIC_MEMBRANE_POTENTIAL	GO_REGULATION_OF_POSTSYNAPTIC_MEMBRANE_POTENTIAL		54	-0.650981	-1.49009	0.0418251	0.644145	1	884	tags=22%, list=5%, signal=23%
GO_RNA_DEPENDENT_DNA_BIOSYNTHETIC_PROCESS	GO_RNA_DEPENDENT_DNA_BIOSYNTHETIC_PROCESS		19	-0.473123	-1.49002	0.0807692	0.63314	1	3367	tags=37%, list=20%, signal=46%
GO_COVALENT_CHROMATIN_MODIFICATION	GO_COVALENT_CHROMATIN_MODIFICATION		299	-0.364407	-1.48908	0.0469925	0.626768	1	4692	tags=43%, list=27%, signal=59%
GO_SYNAPSE_ORGANIZATION	GO_SYNAPSE_ORGANIZATION		135	-0.564022	-1.48584	0.00784314	0.632304	1	2334	tags=37%, list=14%, signal=43%
GO_MODULATION_OF_EXCITATORY_POSTSYNAPTIC_POTENTIAL	GO_MODULATION_OF_EXCITATORY_POSTSYNAPTIC_POTENTIAL		29	-0.710196	-1.48374	0.0234375	0.632195	1	632	tags=34%, list=4%, signal=36%
GO_REGULATION_OF_MRNA_METABOLIC_PROCESS	GO_REGULATION_OF_MRNA_METABOLIC_PROCESS		110	-0.405275	-1.48229	0.0697674	0.629189	1	2815	tags=26%, list=16%, signal=31%
GO_PRESYNAPTIC_PROCESS_INVOLVED_IN_SYNAPTIC_TRANSMISSION	GO_PRESYNAPTIC_PROCESS_INVOLVED_IN_SYNAPTIC_TRANSMISSION		100	-0.61482	-1.48202	0.0606654	0.620239	1	2155	tags=36%, list=13%, signal=41%
GO_NEPHRON_TUBULE_FORMATION	GO_NEPHRON_TUBULE_FORMATION		18	-0.713639	-1.48167	0.0198413	0.612071	1	545	tags=22%, list=3%, signal=23%
GO_MRNA_3_END_PROCESSING	GO_MRNA_3_END_PROCESSING		69	-0.41343	-1.47774	0.104743	0.621179	1	4705	tags=45%, list=27%, signal=62%
GO_REGULATION_OF_RYANODINE_SENSITIVE_CALCIUM_RELEASE_CHANNEL_ACTIVITY	GO_REGULATION_OF_RYANODINE_SENSITIVE_CALCIUM_RELEASE_CHANNEL_ACTIVITY		25	-0.562996	-1.47634	0.0485437	0.61792	1	523	tags=16%, list=3%, signal=16%
GO_MULTI_ORGANISM_METABOLIC_PROCESS	GO_MULTI_ORGANISM_METABOLIC_PROCESS		97	-0.378728	-1.47574	0.135729	0.611624	1	6199	tags=60%, list=36%, signal=93%
GO_TRNA_METHYLATION	GO_TRNA_METHYLATION		17	-0.541145	-1.47124	0.0949612	0.623411	1	4215	tags=53%, list=25%, signal=70%
GO_REGULATION_OF_VOLTAGE_GATED_CALCIUM_CHANNEL_ACTIVITY	GO_REGULATION_OF_VOLTAGE_GATED_CALCIUM_CHANNEL_ACTIVITY		24	-0.60817	-1.47097	0.0521235	0.615508	1	2353	tags=33%, list=14%, signal=39%
GO_REGULATION_OF_DELAYED_RECTIFIER_POTASSIUM_CHANNEL_ACTIVITY	GO_REGULATION_OF_DELAYED_RECTIFIER_POTASSIUM_CHANNEL_ACTIVITY		18	-0.653089	-1.46588	0.0555556	0.630536	1	3484	tags=56%, list=20%, signal=70%
GO_ACTION_POTENTIAL	GO_ACTION_POTENTIAL		90	-0.541297	-1.46205	0.0480769	0.639312	1	2560	tags=27%, list=15%, signal=31%
GO_ESTABLISHMENT_OF_PROTEIN_LOCALIZATION_TO_ENDOPLASMIC_RETICULUM	GO_ESTABLISHMENT_OF_PROTEIN_LOCALIZATION_TO_ENDOPLASMIC_RETICULUM		67	-0.367924	-1.45878	0.167653	0.64589	1	4770	tags=49%, list=28%, signal=68%
GO_INSULIN_SECRETION	GO_INSULIN_SECRETION		34	-0.547391	-1.45742	0.0494297	0.643244	1	1311	tags=26%, list=8%, signal=29%
GO_SYNAPTIC_VESICLE_LOCALIZATION	GO_SYNAPTIC_VESICLE_LOCALIZATION		86	-0.563542	-1.45555	0.0686275	0.643059	1	1009	tags=23%, list=6%, signal=25%
GO_NEUROTRANSMITTER_TRANSPORT	GO_NEUROTRANSMITTER_TRANSPORT		136	-0.597461	-1.45504	0.0729783	0.636728	1	2155	tags=33%, list=13%, signal=38%
GO_RRNA_METABOLIC_PROCESS	GO_RRNA_METABOLIC_PROCESS		195	-0.386474	-1.4522	0.167984	0.641797	1	5533	tags=53%, list=32%, signal=78%
GO_TRANSMISSION_OF_NERVE_IMPULSE	GO_TRANSMISSION_OF_NERVE_IMPULSE		50	-0.600793	-1.45158	0.038835	0.636259	1	2560	tags=34%, list=15%, signal=40%
GO_VENTRAL_SPINAL_CORD_DEVELOPMENT	GO_VENTRAL_SPINAL_CORD_DEVELOPMENT		43	-0.532763	-1.45153	0.0380952	0.62822	1	1724	tags=23%, list=10%, signal=26%
GO_SYNAPSE_ASSEMBLY	GO_SYNAPSE_ASSEMBLY		61	-0.576217	-1.45066	0.0246212	0.624271	1	1724	tags=30%, list=10%, signal=33%
GO_REGULATION_OF_POTASSIUM_ION_TRANSPORT	GO_REGULATION_OF_POTASSIUM_ION_TRANSPORT		80	-0.521848	-1.45066	0.0477099	0.616393	1	2675	tags=33%, list=16%, signal=38%
GO_NCRNA_PROCESSING	GO_NCRNA_PROCESSING		301	-0.382429	-1.44633	0.138	0.627609	1	5533	tags=49%, list=32%, signal=71%
GO_NEURAL_RETINA_DEVELOPMENT	GO_NEURAL_RETINA_DEVELOPMENT		48	-0.544418	-1.44048	0.0239044	0.646316	1	3080	tags=35%, list=18%, signal=43%
GO_CYCLIC_NUCLEOTIDE_CATABOLIC_PROCESS	GO_CYCLIC_NUCLEOTIDE_CATABOLIC_PROCESS		17	-0.603558	-1.43821	0.0522244	0.649204	1	1462	tags=24%, list=8%, signal=26%
GO_REGULATION_OF_CALCIUM_ION_DEPENDENT_EXOCYTOSIS	GO_REGULATION_OF_CALCIUM_ION_DEPENDENT_EXOCYTOSIS		69	-0.541632	-1.43757	0.0942308	0.644267	1	2154	tags=30%, list=13%, signal=35%
GO_CHROMATIN_MODIFICATION	GO_CHROMATIN_MODIFICATION		460	-0.372028	-1.43733	0.0627376	0.637685	1	3957	tags=36%, list=23%, signal=45%
GO_POSITIVE_REGULATION_OF_AMINE_TRANSPORT	GO_POSITIVE_REGULATION_OF_AMINE_TRANSPORT		30	-0.612148	-1.43651	0.0604288	0.634073	1	819	tags=23%, list=5%, signal=24%
GO_HISTONE_DEUBIQUITINATION	GO_HISTONE_DEUBIQUITINATION		19	-0.533779	-1.4357	0.100379	0.630275	1	4605	tags=58%, list=27%, signal=79%
GO_REGULATION_OF_POTASSIUM_ION_TRANSMEMBRANE_TRANSPORT	GO_REGULATION_OF_POTASSIUM_ION_TRANSMEMBRANE_TRANSPORT		59	-0.518435	-1.43267	0.0494071	0.636824	1	1714	tags=25%, list=10%, signal=28%
GO_HINDBRAIN_DEVELOPMENT	GO_HINDBRAIN_DEVELOPMENT		132	-0.450509	-1.43049	0.0194932	0.638892	1	2425	tags=28%, list=14%, signal=32%
GO_NEURON_CELL_CELL_ADHESION	GO_NEURON_CELL_CELL_ADHESION		15	-0.75649	-1.42922	0.0552381	0.63734	1	1048	tags=47%, list=6%, signal=50%
GO_POSITIVE_REGULATION_OF_ENDOTHELIAL_CELL_DIFFERENTIATION	GO_POSITIVE_REGULATION_OF_ENDOTHELIAL_CELL_DIFFERENTIATION		15	-0.668933	-1.42899	0.0786948	0.631273	1	3106	tags=40%, list=18%, signal=49%
GO_NEURONAL_ACTION_POTENTIAL	GO_NEURONAL_ACTION_POTENTIAL		25	-0.65649	-1.42899	0.0601504	0.624361	1	884	tags=28%, list=5%, signal=29%
GO_SYNAPTIC_VESICLE_CYCLE	GO_SYNAPTIC_VESICLE_CYCLE		74	-0.596745	-1.42865	0.0933852	0.61891	1	1009	tags=26%, list=6%, signal=27%
GO_MEMBRANE_DEPOLARIZATION	GO_MEMBRANE_DEPOLARIZATION		57	-0.550314	-1.42835	0.0455408	0.613417	1	2560	tags=32%, list=15%, signal=37%
GO_SYNAPTIC_SIGNALING	GO_SYNAPTIC_SIGNALING		394	-0.534418	-1.42706	0.0836576	0.612548	1	2344	tags=29%, list=14%, signal=33%
GO_GAMMA_AMINOBUTYRIC_ACID_SIGNALING_PATHWAY	GO_GAMMA_AMINOBUTYRIC_ACID_SIGNALING_PATHWAY		21	-0.803368	-1.42604	0.0333988	0.610429	1	1797	tags=57%, list=10%, signal=64%
GO_GLUTAMATE_RECEPTOR_SIGNALING_PATHWAY	GO_GLUTAMATE_RECEPTOR_SIGNALING_PATHWAY		41	-0.651332	-1.42469	0.0706107	0.609771	1	3050	tags=51%, list=18%, signal=62%
GO_IONOTROPIC_GLUTAMATE_RECEPTOR_SIGNALING_PATHWAY	GO_IONOTROPIC_GLUTAMATE_RECEPTOR_SIGNALING_PATHWAY		24	-0.710565	-1.42398	0.0610687	0.606611	1	2420	tags=50%, list=14%, signal=58%
GO_DENDRITE_MORPHOGENESIS	GO_DENDRITE_MORPHOGENESIS		40	-0.588442	-1.4238	0.0392927	0.601173	1	1036	tags=28%, list=6%, signal=29%
GO_DENDRITE_DEVELOPMENT	GO_DENDRITE_DEVELOPMENT		76	-0.50841	-1.42209	0.0409357	0.602265	1	1169	tags=22%, list=7%, signal=24%
GO_SIGNAL_RELEASE	GO_SIGNAL_RELEASE		153	-0.503523	-1.4202	0.0836576	0.60385	1	1313	tags=24%, list=8%, signal=26%
GO_BINDING_OF_SPERM_TO_ZONA_PELLUCIDA	GO_BINDING_OF_SPERM_TO_ZONA_PELLUCIDA		30	-0.424048	-1.41867	0.125532	0.604311	1	2939	tags=13%, list=17%, signal=16%
GO_REGULATION_OF_TRANSCRIPTION_ELONGATION_FROM_RNA_POLYMERASE_II_PROMOTER	GO_REGULATION_OF_TRANSCRIPTION_ELONGATION_FROM_RNA_POLYMERASE_II_PROMOTER		20	-0.453006	-1.41534	0.106719	0.611991	1	4692	tags=40%, list=27%, signal=55%
GO_REGULATION_OF_ARF_PROTEIN_SIGNAL_TRANSDUCTION	GO_REGULATION_OF_ARF_PROTEIN_SIGNAL_TRANSDUCTION		15	-0.546883	-1.41508	0.104247	0.607149	1	1802	tags=33%, list=10%, signal=37%
GO_GMP_METABOLIC_PROCESS	GO_GMP_METABOLIC_PROCESS		19	-0.527113	-1.41304	0.0872093	0.609296	1	3118	tags=47%, list=18%, signal=58%
[truncated: 908 more rows]
